# Supplementary material for: Drosophila nicotinic acetylcholine receptor subunits and their native interactions with insecticidal peptide toxins
Source: eLife. 2022 May 16;11:e74322. doi: 10.7554/eLife.74322 (PMC9110030; doi:10.7554/eLife.74322)
Supplement: Figure 3—figure supplement 1—source data 1. [file elife-74322-fig3-figsupp1-data1.xlsx]

## Sheet: Info
Sheet	Figure	Number of figure (short number)	Name of Figure (short name)
Sheet1	Figure 3 — figure supplement 1	Fig S1A	Coupling efficiency of a-Btx to affinity beads

## Sheet: Sheet1
Fig S1A Coupling efficiency
	a-Btx 390 nm/ 475 nm
Replicates	Uncoupled	Coupled	P value
First	4970.4	345.7	0.00106447
Second	4614.2	301.7
Third	4000.5	318.6
Fourth	3517.5	476.6
Fifth	4072.3	455
Sixth	4468.1	403.3
Seventh	3691.5	273.1
