# Supplementary material for: Drosophila nicotinic acetylcholine receptor subunits and their native interactions with insecticidal peptide toxins
Source: eLife. 2022 May 16;11:e74322. doi: 10.7554/eLife.74322 (PMC9110030; doi:10.7554/eLife.74322)
Supplement: Figure 4—figure supplement 1—source data 1. [file elife-74322-fig4-figsupp1-data1.xlsx]

## Sheet: Info
Sheet	Figure	Number of figure (short number)	Name of Figure (short name)
Sheet1	Figure 4 — figure supplement 1	Fig S1A	GO term for biological process
Sheet1	Figure 4 — figure supplement 1	Fig S1B	GO term for molecular function
Sheet2	Figure 4 — figure supplement 1	Fig S1C	Beta-barrel membrane proteins
Sheet2	Figure 4 — figure supplement 1	Fig S1D	Palmitoylated proteins
Sheet2	Figure 4 — figure supplement 1	Fig S1E	Myristoylated proteins
Sheet2	Figure 4 — figure supplement 1	Fig S1F	GPI-anchored proteins

## Sheet: Sheet1
Fig S1A GO term for biological process					Fig S1B GO term for molecular function
Biological process	Id proteins without SMA	Biological process	Id proteins with SMA		Molecular function	Id proteins without SMA	Molecular function	Id proteins with SMA
01 metabolic process	427	01 metabolic process	1393		01 catalytic activity	384	01 catalytic activity	1196
02 regulation of biological process	223	02 regulation of biological process	913		02 protein binding	189	02 protein binding	800
03 response to stimulus	195	03 response to stimulus	727		03 <Not Set>	57	03 <Not Set>	427
04 cell organization and biogenesis	146	04 cell organization and biogenesis	679		04 metal ion binding	126	04 metal ion binding	394
05 transport	103	05 transport	568		05 nucleotide binding	129	05 nucleotide binding	388
06 <Not Set>	60	06 <Not Set>	341		06 transporter activity	33	06 transporter activity	230
07 cellular component movement	33	07 cellular component movement	161		07 RNA binding	52	07 RNA binding	221
08 cell communication	29	08 cell communication	145		08 structural molecule activity	51	08 structural molecule activity	207
09 cellular homeostasis	36	09 cellular homeostasis	103		09 enzyme regulator activity	33	09 enzyme regulator activity	109
10 development	26	10 development	91		10 DNA binding	16	10 DNA binding	82
11 defense response	20	11 defense response	81		11 signal transducer activity	11	11 signal transducer activity	72
12 reproduction	17	12 reproduction	80		12 receptor activity	7	12 receptor activity	58
13 cell differentiation	17	13 cell differentiation	70		13 motor activity	7	13 motor activity	43
14 cell division	10	14 cell division	54		14 antioxidant activity	19	14 antioxidant activity	24
15 cell death	13	15 cell death	48		15 translation regulator activity	0	15 translation regulator activity	3
16 cell proliferation	6	16 cell proliferation	35		16 transcription regulator activity	0	16 transcription regulator activity	0
17 cell growth	3	17 cell growth	33		01 catalytic activity	516	01 catalytic activity	1357
18 coagulation	2	18 coagulation	7		02 protein binding	251	02 protein binding	904
19 conjugation	0	19 conjugation	0		03 <Not Set>	92	03 <Not Set>	456
01 metabolic process	588	01 metabolic process	1585		04 metal ion binding	165	04 metal ion binding	444
02 regulation of biological process	295	02 regulation of biological process	1022		05 nucleotide binding	168	05 nucleotide binding	431
03 response to stimulus	262	03 response to stimulus	798		06 transporter activity	35	06 transporter activity	273
04 cell organization and biogenesis	203	04 cell organization and biogenesis	744		07 RNA binding	84	07 RNA binding	258
05 transport	132	05 transport	649		08 structural molecule activity	72	08 structural molecule activity	212
06 <Not Set>	86	06 <Not Set>	363		09 enzyme regulator activity	40	09 enzyme regulator activity	127
07 cellular component movement	45	07 cellular component movement	185		10 DNA binding	21	10 DNA binding	102
08 cell communication	40	08 cell communication	157		11 signal transducer activity	21	11 signal transducer activity	87
09 cellular homeostasis	49	09 cellular homeostasis	114		12 receptor activity	9	12 receptor activity	78
10 development	32	10 development	104		13 motor activity	10	13 motor activity	47
11 defense response	30	11 defense response	95		14 antioxidant activity	21	14 antioxidant activity	26
12 reproduction	28	12 reproduction	88		15 translation regulator activity	1	15 translation regulator activity	5
13 cell differentiation	21	13 cell differentiation	80		16 transcription regulator activity	0	16 transcription regulator activity	0
14 cell division	16	14 cell division	64		01 catalytic activity	191	01 catalytic activity	934
15 cell death	15	15 cell death	55		02 protein binding	90	02 protein binding	607
16 cell proliferation	10	16 cell proliferation	44		03 <Not Set>	25	03 <Not Set>	300
17 cell growth	7	17 cell growth	37		04 metal ion binding	55	04 metal ion binding	306
18 coagulation	3	18 coagulation	7		05 nucleotide binding	86	05 nucleotide binding	325
19 conjugation	0	19 conjugation	0		06 transporter activity	22	06 transporter activity	194
01 metabolic process	205	01 metabolic process	1077		07 RNA binding	28	07 RNA binding	179
02 regulation of biological process	121	02 regulation of biological process	704		08 structural molecule activity	36	08 structural molecule activity	172
03 response to stimulus	108	03 response to stimulus	555		09 enzyme regulator activity	17	09 enzyme regulator activity	91
04 cell organization and biogenesis	74	04 cell organization and biogenesis	520		10 DNA binding	8	10 DNA binding	60
05 transport	63	05 transport	459		11 signal transducer activity	10	11 signal transducer activity	55
06 <Not Set>	30	06 <Not Set>	237		12 receptor activity	6	12 receptor activity	45
07 cellular component movement	21	07 cellular component movement	121		13 motor activity	6	13 motor activity	43
08 cell communication	23	08 cell communication	118		14 antioxidant activity	10	14 antioxidant activity	15
09 cellular homeostasis	16	09 cellular homeostasis	84		15 translation regulator activity	0	15 translation regulator activity	3
10 development	8	10 development	75		16 transcription regulator activity	0	16 transcription regulator activity	0
11 defense response	8	11 defense response	61		01 catalytic activity	300	01 catalytic activity	1027
12 reproduction	8	12 reproduction	65		02 protein binding	147	02 protein binding	643
13 cell differentiation	7	13 cell differentiation	56		03 <Not Set>	40	03 <Not Set>	329
14 cell division	8	14 cell division	36		04 metal ion binding	98	04 metal ion binding	320
15 cell death	8	15 cell death	39		05 nucleotide binding	115	05 nucleotide binding	333
16 cell proliferation	2	16 cell proliferation	28		06 transporter activity	25	06 transporter activity	172
17 cell growth	3	17 cell growth	21		07 RNA binding	40	07 RNA binding	200
18 coagulation	2	18 coagulation	6		08 structural molecule activity	40	08 structural molecule activity	179
19 conjugation	0	19 conjugation	0		09 enzyme regulator activity	25	09 enzyme regulator activity	99
01 metabolic process	327	01 metabolic process	1214		10 DNA binding	12	10 DNA binding	59
02 regulation of biological process	175	02 regulation of biological process	715		11 signal transducer activity	14	11 signal transducer activity	58
03 response to stimulus	164	03 response to stimulus	584		12 receptor activity	6	12 receptor activity	45
04 cell organization and biogenesis	110	04 cell organization and biogenesis	547		13 motor activity	6	13 motor activity	41
05 transport	81	05 transport	446		14 antioxidant activity	15	14 antioxidant activity	24
06 <Not Set>	45	06 <Not Set>	254		15 translation regulator activity	0	15 translation regulator activity	4
07 cellular component movement	30	07 cellular component movement	122		16 transcription regulator activity	0	16 transcription regulator activity	0
08 cell communication	29	08 cell communication	111				01 catalytic activity	985
09 cellular homeostasis	34	09 cellular homeostasis	92				02 protein binding	643
10 development	17	10 development	82				03 <Not Set>	327
11 defense response	15	11 defense response	69				04 metal ion binding	320
12 reproduction	11	12 reproduction	83				05 nucleotide binding	323
13 cell differentiation	11	13 cell differentiation	64				06 transporter activity	183
14 cell division	8	14 cell division	43				07 RNA binding	188
15 cell death	12	15 cell death	38				08 structural molecule activity	179
16 cell proliferation	7	16 cell proliferation	28				09 enzyme regulator activity	90
17 cell growth	4	17 cell growth	22				10 DNA binding	62
18 coagulation	2	18 coagulation	6				11 signal transducer activity	49
19 conjugation	0	19 conjugation	0				12 receptor activity	39
		01 metabolic process	1297				13 motor activity	41
		02 regulation of biological process	843				14 antioxidant activity	21
		03 response to stimulus	670				15 translation regulator activity	2
		04 cell organization and biogenesis	622				16 transcription regulator activity	0
		05 transport	549				01 catalytic activity	990
		06 <Not Set>	305				02 protein binding	666
		07 cellular component movement	142				03 <Not Set>	333
		08 cell communication	147				04 metal ion binding	328
		09 cellular homeostasis	97				05 nucleotide binding	338
		10 development	90				06 transporter activity	208
		11 defense response	77				07 RNA binding	205
		12 reproduction	76				08 structural molecule activity	182
		13 cell differentiation	68				09 enzyme regulator activity	95
		14 cell division	46				10 DNA binding	63
		15 cell death	50				11 signal transducer activity	61
		16 cell proliferation	33				12 receptor activity	51
		17 cell growth	29				13 motor activity	43
		18 coagulation	7				14 antioxidant activity	21
		19 conjugation	0				15 translation regulator activity	4
		01 metabolic process	1192				16 transcription regulator activity	0
		02 regulation of biological process	710				01 catalytic activity	1110
		03 response to stimulus	569				02 protein binding	761
		04 cell organization and biogenesis	526				03 <Not Set>	381
		05 transport	455				04 metal ion binding	353
		06 <Not Set>	240				05 nucleotide binding	372
		07 cellular component movement	124				06 transporter activity	234
		08 cell communication	113				07 RNA binding	208
		09 cellular homeostasis	94				08 structural molecule activity	191
		10 development	73				09 enzyme regulator activity	105
		11 defense response	69				10 DNA binding	68
		12 reproduction	81				11 signal transducer activity	71
		13 cell differentiation	56				12 receptor activity	60
		14 cell division	41				13 motor activity	47
		15 cell death	40				14 antioxidant activity	21
		16 cell proliferation	26				15 translation regulator activity	3
		17 cell growth	23				16 transcription regulator activity	0
		18 coagulation	6				01 catalytic activity	1028
		19 conjugation	0				02 protein binding	637
		01 metabolic process	1091				03 <Not Set>	314
		02 regulation of biological process	634				04 metal ion binding	329
		03 response to stimulus	513				05 nucleotide binding	326
		04 cell organization and biogenesis	472				06 transporter activity	180
		05 transport	408				07 RNA binding	196
		06 <Not Set>	205				08 structural molecule activity	171
		07 cellular component movement	108				09 enzyme regulator activity	94
		08 cell communication	95				10 DNA binding	60
		09 cellular homeostasis	88				11 signal transducer activity	47
		10 development	68				12 receptor activity	36
		11 defense response	56				13 motor activity	37
		12 reproduction	75				14 antioxidant activity	23
		13 cell differentiation	49				15 translation regulator activity	4
		14 cell division	32				16 transcription regulator activity	0
		15 cell death	32				01 catalytic activity	933
		16 cell proliferation	28				02 protein binding	571
		17 cell growth	21				03 <Not Set>	271
		18 coagulation	4				04 metal ion binding	277
		19 conjugation	0				05 nucleotide binding	304
		01 metabolic process	1354				06 transporter activity	162
		02 regulation of biological process	873				07 RNA binding	169
		03 response to stimulus	687				08 structural molecule activity	166
		04 cell organization and biogenesis	651				09 enzyme regulator activity	89
		05 transport	560				10 DNA binding	56
		06 <Not Set>	333				11 signal transducer activity	47
		07 cellular component movement	149				12 receptor activity	35
		08 cell communication	137				13 motor activity	38
		09 cellular homeostasis	104				14 antioxidant activity	20
		10 development	84				15 translation regulator activity	2
		11 defense response	83				16 transcription regulator activity	0
		12 reproduction	81				01 catalytic activity	1151
		13 cell differentiation	64				02 protein binding	760
		14 cell division	51				03 <Not Set>	429
		15 cell death	47				04 metal ion binding	376
		16 cell proliferation	29				05 nucleotide binding	379
		17 cell growth	31				06 transporter activity	238
		18 coagulation	6				07 RNA binding	224
		19 conjugation	0				08 structural molecule activity	202
							09 enzyme regulator activity	113
							10 DNA binding	82
							11 signal transducer activity	77
							12 receptor activity	62
							13 motor activity	47
							14 antioxidant activity	23
							15 translation regulator activity	4
							16 transcription regulator activity	0

## Sheet: Sheet2
Fig S1C Beta-barrel membrane proteins					Fig S1D Palmitoylated proteins					Fig S1E Myristoylated proteins					Fig S1F GPI-anchored proteins
	Number of identified proteins					Number of identified proteins					Number of identified proteins					Number of identified proteins
Replicates	Without SMA	With SMA	P value		Replicates	Without SMA	With SMA	P value		Replicates	Without SMA	With SMA	P value		Replicates	Without SMA	With SMA	P value
First	1	4	8.66968e-08		First	5	41	2.90089e-05		First	3	22	1.61498e-05		First	7	20	0.705638
Second	1	4			Second	3	52			Second	8	17			Second	12	24
Third	1	5			Third	8	38			Third	11	19			Third	28	17
Fourth	1	5			Fourth	4	44			Fourth	12	23			Fourth	29	21
Fifth	1	3			Fifth	9	32			Fifth	7	31			Fifth	22	33
Sixth	1	4			Sixth	7	28			Sixth	12	23			Sixth	36	42
Seventh		5			Seventh	10	30			Seventh		31			Seventh		32
Eighth		4			Eighth	15	22			Eighth		18			Eighth		12
Nineth		5								Nineth		19			Nineth		19
Tenth		4								Tenth		28			Tenth		24
