# Supplementary material for: Drosophila nicotinic acetylcholine receptor subunits and their native interactions with insecticidal peptide toxins
Source: eLife. 2022 May 16;11:e74322. doi: 10.7554/eLife.74322 (PMC9110030; doi:10.7554/eLife.74322)
Supplement: Figure 4—source data 1. [file elife-74322-fig4-data1.xlsx]

## Sheet: Info 
Sheet	Figure	Number of figure (short number)	Name of Figure (short name)
Sheet1	Figure 4	Fig 4A	Proteins with and without SMA
Sheet1	Figure 4	Fig 4B	MS/MS counts with and without SMA
Sheet2	Figure 4	Fig 4C	Calculated hydrophobicity score of amino acid residues found in protein sequences
Sheet3	Figure 4	Fig 4D	GO term for cellular compartment
Sheet3	Figure 4	Fig 4E	Prediction of proteins with transmembrane helices (TMHS)
Sheet4	Figure 4	Fig 4F	Scatter plot (Solubility/Hydrophobicity score)
Sheet4	Figure 4	Fig 4G	Scatter plot (Solubility/Transmembrane helices TMHS)

## Sheet: Sheet1
Fig 4A Proteins with and without SMA					Fig 4B MS/MS counts with and without SMA
	Number of identified proteins					Number of identified MS/MS counts
Replicates	Without SMA	With SMA	P value		Replicates	Without SMA	With SMA	P value
First	619	2067	0.00458182		First	32389	34428	0.918026
Second	815	2067			Second	27068	32583
Third	1414	2432			Third	35515	33266
Fourth	1753	2338			Fourth	39990	36509
Fifth	1302	2029			Fifth	36142	36590
Sixth	1716	1817			Sixth	37047	36031
Seventh		2029			Seventh		33418
Eighth		1817			Eighth		32389

## Sheet: Sheet2
Fig 4C Calculated hydrophobicity score of amino acid residues found in protein sequences
solubilized without SMA			solubilized with SMA
Protein name	Hydrophobicity score1	P value	Protein name	Hydrophobicity score2
>sp|P02842|SGS8_DROME Salivary glue protein Sgs-8 OS=Drosophila melanogaster OX=7227 GN=Sgs8 PE=2 SV=1	0.697333	4.26222e-24	>sp|P18930|NU3M_DROME NADH-ubiquinone oxidoreductase chain 3 OS=Drosophila melanogaster OX=7227 GN=mt:ND3 PE=3 SV=1	1.17094
>tr|Q9VZF9|Q9VZF9_DROME Cuticular protein 64Ad OS=Drosophila melanogaster OX=7227 GN=Cpr64Ad PE=1 SV=2	0.637652		>sp|P18930|NU3M_DROME NADH-ubiquinone oxidoreductase chain 3 OS=Drosophila melanogaster OX=7227 GN=mt:ND3 PE=3 SV=1	1.17094
>tr|B4ZJA1|B4ZJA1_DROME Seminal fluid protein 60F OS=Drosophila melanogaster OX=7227 GN=Sfp60F PE=2 SV=1	0.553968		>sp|P23380|VATL_DROME V-type proton ATPase 16 kDa proteolipid subunit OS=Drosophila melanogaster OX=7227 GN=Vha16-1 PE=2 SV=1	1.06164
>sp|Q23982|PEB2_DROME Ejaculatory bulb-specific protein 2 OS=Drosophila melanogaster OX=7227 GN=EbpII PE=2 SV=2	0.513636		>sp|P23380|VATL_DROME V-type proton ATPase 16 kDa proteolipid subunit OS=Drosophila melanogaster OX=7227 GN=Vha16-1 PE=2 SV=1	1.06164
>tr|Q6GUT7|Q6GUT7_DROME ACP53C14A OS=Drosophila melanogaster OX=7227 GN=Acp53C14a PE=2 SV=1	0.456198		>sp|P23380|VATL_DROME V-type proton ATPase 16 kDa proteolipid subunit OS=Drosophila melanogaster OX=7227 GN=Vha16-1 PE=2 SV=1	1.06164
>sp|P00408|COX2_DROME Cytochrome c oxidase subunit 2 OS=Drosophila melanogaster OX=7227 GN=mt:CoII PE=3 SV=1	0.410526		>sp|P18929|NU1M_DROME NADH-ubiquinone oxidoreductase chain 1 OS=Drosophila melanogaster OX=7227 GN=mt:ND1 PE=3 SV=3	1.05256
>tr|M9PG89|M9PG89_DROME Uncharacterized protein, isoform B OS=Drosophila melanogaster OX=7227 GN=Dmel\CG13077 PE=4 SV=1	0.40708		>sp|P18929|NU1M_DROME NADH-ubiquinone oxidoreductase chain 1 OS=Drosophila melanogaster OX=7227 GN=mt:ND1 PE=3 SV=3	1.05256
>tr|Q9VQA3|Q9VQA3_DROME Uncharacterized protein, isoform A OS=Drosophila melanogaster OX=7227 GN=anon-SAGE:Wang-110 PE=4 SV=1	0.396735		>sp|P18929|NU1M_DROME NADH-ubiquinone oxidoreductase chain 1 OS=Drosophila melanogaster OX=7227 GN=mt:ND1 PE=3 SV=3	1.05256
>sp|Q9W0V7|MTH8_DROME Probable G-protein coupled receptor Mth-like 8 OS=Drosophila melanogaster OX=7227 GN=mthl8 PE=2 SV=2	0.393089		>tr|Q8MMD0|Q8MMD0_DROME RH04491p OS=Drosophila melanogaster OX=7227 GN=BcDNA:RH04491 PE=2 SV=3	1.04365
>tr|Q0E9G8|Q0E9G8_DROME Gustatory receptor OS=Drosophila melanogaster OX=7227 GN=Gr43a PE=3 SV=1	0.376615		>sp|P18931|NU4M_DROME NADH-ubiquinone oxidoreductase chain 4 OS=Drosophila melanogaster OX=7227 GN=mt:ND4 PE=3 SV=3	1.03251
>sp|P06002|OPS1_DROME Opsin Rh1 OS=Drosophila melanogaster OX=7227 GN=ninaE PE=1 SV=1	0.370777		>sp|P18931|NU4M_DROME NADH-ubiquinone oxidoreductase chain 4 OS=Drosophila melanogaster OX=7227 GN=mt:ND4 PE=3 SV=3	1.03251
>tr|Q9VIH9|Q9VIH9_DROME GEO04151p1 OS=Drosophila melanogaster OX=7227 GN=BcDNA:GH07967 PE=2 SV=1	0.337415		>sp|P18932|NU5M_DROME NADH-ubiquinone oxidoreductase chain 5 OS=Drosophila melanogaster OX=7227 GN=mt:ND5 PE=3 SV=4	0.968357
>sp|P04814|TRYA_DROME Trypsin alpha OS=Drosophila melanogaster OX=7227 GN=alphaTry PE=2 SV=1	0.334375		>sp|P18932|NU5M_DROME NADH-ubiquinone oxidoreductase chain 5 OS=Drosophila melanogaster OX=7227 GN=mt:ND5 PE=3 SV=4	0.968357
>sp|P04814|TRYA_DROME Trypsin alpha OS=Drosophila melanogaster OX=7227 GN=alphaTry PE=2 SV=1	0.334375		>sp|P18932|NU5M_DROME NADH-ubiquinone oxidoreductase chain 5 OS=Drosophila melanogaster OX=7227 GN=mt:ND5 PE=3 SV=4	0.968357
>tr|Q9U1L2|Q9U1L2_DROME EG:BACR7A4.14 protein OS=Drosophila melanogaster OX=7227 GN=EG:BACR7A4.14 PE=1 SV=1	0.315538		>tr|Q6IKC0|Q6IKC0_DROME HDC12925 OS=Drosophila melanogaster OX=7227 GN=Dmel\CG42394 PE=2 SV=1	0.903896
>tr|Q9U1L2|Q9U1L2_DROME EG:BACR7A4.14 protein OS=Drosophila melanogaster OX=7227 GN=EG:BACR7A4.14 PE=1 SV=1	0.315538		>tr|Q6IKC0|Q6IKC0_DROME HDC12925 OS=Drosophila melanogaster OX=7227 GN=Dmel\CG42394 PE=2 SV=1	0.903896
>tr|Q9U1L2|Q9U1L2_DROME EG:BACR7A4.14 protein OS=Drosophila melanogaster OX=7227 GN=EG:BACR7A4.14 PE=1 SV=1	0.315538		>sp|P00850|ATP6_DROME ATP synthase subunit a OS=Drosophila melanogaster OX=7227 GN=mt:ATPase6 PE=3 SV=4	0.894643
>sp|P35004|TRYB_DROME Trypsin beta OS=Drosophila melanogaster OX=7227 GN=betaTry PE=2 SV=2	0.272727		>tr|Q9VZ71|Q9VZ71_DROME RE01453p OS=Drosophila melanogaster OX=7227 GN=Dmel\CG15211 PE=2 SV=1	0.866667
>tr|Q9VQT8|Q9VQT8_DROME Immune induced molecule 33, isoform A OS=Drosophila melanogaster OX=7227 GN=IM33 PE=1 SV=1	0.265854		>sp|Q9VLM5|DAD1_DROME Dolichyl-diphosphooligosaccharide--protein glycosyltransferase subunit DAD1 OS=Drosophila melanogaster OX=7227 GN=Dad1 PE=1 SV=1	0.824107
>tr|Q9VQT8|Q9VQT8_DROME Immune induced molecule 33, isoform A OS=Drosophila melanogaster OX=7227 GN=IM33 PE=1 SV=1	0.265854		>sp|Q9VLM5|DAD1_DROME Dolichyl-diphosphooligosaccharide--protein glycosyltransferase subunit DAD1 OS=Drosophila melanogaster OX=7227 GN=Dad1 PE=1 SV=1	0.824107
>tr|Q9VQT8|Q9VQT8_DROME Immune induced molecule 33, isoform A OS=Drosophila melanogaster OX=7227 GN=IM33 PE=1 SV=1	0.265854		>sp|Q9VLM5|DAD1_DROME Dolichyl-diphosphooligosaccharide--protein glycosyltransferase subunit DAD1 OS=Drosophila melanogaster OX=7227 GN=Dad1 PE=1 SV=1	0.824107
>tr|Q9VF46|Q9VF46_DROME GH25158p OS=Drosophila melanogaster OX=7227 GN=Dmel\CG5399 PE=2 SV=1	0.256422		>tr|Q9VZE9|Q9VZE9_DROME V-type proton ATPase subunit OS=Drosophila melanogaster OX=7227 GN=VhaM9.7-a PE=2 SV=1	0.795294
>tr|Q9VRS7|Q9VRS7_DROME GH01508p OS=Drosophila melanogaster OX=7227 GN=Jon65Aiii PE=2 SV=1	0.245985		>sp|P18935|CYB_DROME Cytochrome b OS=Drosophila melanogaster OX=7227 GN=mt:Cyt-b PE=3 SV=2	0.786243
>tr|Q9VD30|Q9VD30_DROME GH05294p OS=Drosophila melanogaster OX=7227 GN=rdhB PE=1 SV=1	0.224597		>sp|P18935|CYB_DROME Cytochrome b OS=Drosophila melanogaster OX=7227 GN=mt:Cyt-b PE=3 SV=2	0.786243
>tr|Q9VD30|Q9VD30_DROME GH05294p OS=Drosophila melanogaster OX=7227 GN=rdhB PE=1 SV=1	0.224597		>sp|P18935|CYB_DROME Cytochrome b OS=Drosophila melanogaster OX=7227 GN=mt:Cyt-b PE=3 SV=2	0.786243
>tr|Q9VD30|Q9VD30_DROME GH05294p OS=Drosophila melanogaster OX=7227 GN=rdhB PE=1 SV=1	0.224597		>tr|Q7JWV7|Q7JWV7_DROME Tetraspanin OS=Drosophila melanogaster OX=7227 GN=Tsp42Ed PE=1 SV=1	0.748458
>tr|Q7KTP4|Q7KTP4_DROME Reticulon-like protein OS=Drosophila melanogaster OX=7227 GN=Rtnl1 PE=1 SV=1	0.221368		>tr|Q7JWV7|Q7JWV7_DROME Tetraspanin OS=Drosophila melanogaster OX=7227 GN=Tsp42Ed PE=1 SV=1	0.748458
>tr|Q7KTP4|Q7KTP4_DROME Reticulon-like protein OS=Drosophila melanogaster OX=7227 GN=Rtnl1 PE=1 SV=1	0.221368		>tr|Q8SY19|Q8SY19_DROME Microsomal glutathione S-transferase-like, isoform A OS=Drosophila melanogaster OX=7227 GN=Mgstl PE=1 SV=1	0.729605
>tr|Q7KN94|Q7KN94_DROME Walrus, isoform A OS=Drosophila melanogaster OX=7227 GN=wal PE=1 SV=1	0.216667		>tr|Q8SY19|Q8SY19_DROME Microsomal glutathione S-transferase-like, isoform A OS=Drosophila melanogaster OX=7227 GN=Mgstl PE=1 SV=1	0.729605
>tr|Q7KN94|Q7KN94_DROME Walrus, isoform A OS=Drosophila melanogaster OX=7227 GN=wal PE=1 SV=1	0.216667		>tr|Q8SY19|Q8SY19_DROME Microsomal glutathione S-transferase-like, isoform A OS=Drosophila melanogaster OX=7227 GN=Mgstl PE=1 SV=1	0.729605
>tr|Q7KN94|Q7KN94_DROME Electron transfer flavoprotein subunit alpha OS=Drosophila melanogaster OX=7227 GN=wal PE=1 SV=1	0.216667		>sp|P00399|COX1_DROME Cytochrome c oxidase subunit 1 OS=Drosophila melanogaster OX=7227 GN=mt:CoI PE=2 SV=2	0.726614
>sp|P12426|APT_DROME Adenine phosphoribosyltransferase OS=Drosophila melanogaster OX=7227 GN=Aprt PE=2 SV=3	0.2		>sp|P00399|COX1_DROME Cytochrome c oxidase subunit 1 OS=Drosophila melanogaster OX=7227 GN=mt:CoI PE=2 SV=2	0.726614
>sp|Q9V447|KRH2_DROME Krueppel homolog 2 OS=Drosophila melanogaster OX=7227 GN=Kr-h2 PE=1 SV=1	0.18913		>sp|P00399|COX1_DROME Cytochrome c oxidase subunit 1 OS=Drosophila melanogaster OX=7227 GN=mt:CoI PE=2 SV=2	0.726614
>sp|Q9VV36|RETIN_DROME Retinin OS=Drosophila melanogaster OX=7227 GN=retinin PE=1 SV=2	0.187435		>tr|M9PCB0|M9PCB0_DROME Uncharacterized protein OS=Drosophila melanogaster OX=7227 GN=Dmel\CG43922 PE=4 SV=1	0.720988
>sp|Q9VV36|RETIN_DROME Retinin OS=Drosophila melanogaster OX=7227 GN=retinin PE=1 SV=2	0.187435		>tr|Q6NR72|Q6NR72_DROME Entomoglyceroporin 4, isoform A OS=Drosophila melanogaster OX=7227 GN=Eglp4 PE=1 SV=1	0.68755
>tr|Q9VRS6|Q9VRS6_DROME Jonah 65Aiv OS=Drosophila melanogaster OX=7227 GN=Jon65Aiv PE=1 SV=1	0.185609		>tr|Q6NR72|Q6NR72_DROME Entomoglyceroporin 4, isoform A OS=Drosophila melanogaster OX=7227 GN=Eglp4 PE=1 SV=1	0.68755
>sp|Q9VA37|DJ1B_DROME Protein dj-1beta OS=Drosophila melanogaster OX=7227 GN=dj-1beta PE=1 SV=3	0.182888		>tr|Q6NR72|Q6NR72_DROME Entomoglyceroporin 4, isoform A OS=Drosophila melanogaster OX=7227 GN=Eglp4 PE=1 SV=1	0.68755
>sp|Q9VA37|DJ1B_DROME Protein dj-1beta OS=Drosophila melanogaster OX=7227 GN=dj-1beta PE=1 SV=3	0.182888		>tr|Q0E9A2|Q0E9A2_DROME No extended memory, isoform C OS=Drosophila melanogaster OX=7227 GN=nemy PE=4 SV=1	0.687143
>sp|Q9VA37|DJ1B_DROME Protein dj-1beta OS=Drosophila melanogaster OX=7227 GN=dj-1beta PE=1 SV=3	0.182888		>tr|Q0E9A2|Q0E9A2_DROME No extended memory, isoform C OS=Drosophila melanogaster OX=7227 GN=nemy PE=4 SV=1	0.687143
>tr|Q9VNF3|Q9VNF3_DROME RE01652p OS=Drosophila melanogaster OX=7227 GN=Dmel\CG12171 PE=1 SV=1	0.181712		>tr|Q0E9A2|Q0E9A2_DROME No extended memory, isoform C OS=Drosophila melanogaster OX=7227 GN=nemy PE=4 SV=1	0.687143
>tr|Q9VNF3|Q9VNF3_DROME RE01652p OS=Drosophila melanogaster OX=7227 GN=Dmel\CG12171 PE=1 SV=1	0.181712		>tr|Q9VGP3|Q9VGP3_DROME FI02016p OS=Drosophila melanogaster OX=7227 GN=Dmel\CG6723 PE=2 SV=1	0.667291
>tr|Q8SX57|Q8SX57_DROME LD44221p OS=Drosophila melanogaster OX=7227 GN=CG11005 PE=1 SV=1	0.181712		>tr|Q9VGP3|Q9VGP3_DROME FI02016p OS=Drosophila melanogaster OX=7227 GN=Dmel\CG6723 PE=2 SV=1	0.667291
>tr|Q9VNF3|Q9VNF3_DROME RE01652p OS=Drosophila melanogaster OX=7227 GN=Dmel\CG12171 PE=1 SV=1	0.181712		>tr|Q9V9Y0|Q9V9Y0_DROME GH11014p OS=Drosophila melanogaster OX=7227 GN=Dmel\CG1607 PE=1 SV=1	0.656238
>tr|Q8SX57|Q8SX57_DROME LD44221p OS=Drosophila melanogaster OX=7227 GN=CG11005 PE=1 SV=1	0.181712		>tr|Q9I7U2|Q9I7U2_DROME GH23190p OS=Drosophila melanogaster OX=7227 GN=Dmel\CG1275 PE=1 SV=1	0.655906
>tr|Q6GUR9|Q6GUR9_DROME ACP53C14B OS=Drosophila melanogaster OX=7227 GN=Acp53C14b PE=1 SV=1	0.179545		>tr|Q9I7U2|Q9I7U2_DROME GH23190p OS=Drosophila melanogaster OX=7227 GN=Dmel\CG1275 PE=1 SV=1	0.655906
>tr|Q6GUR9|Q6GUR9_DROME ACP53C14B OS=Drosophila melanogaster OX=7227 GN=Acp53C14b PE=1 SV=1	0.179545		>tr|Q9I7U2|Q9I7U2_DROME GH23190p OS=Drosophila melanogaster OX=7227 GN=Dmel\CG1275 PE=1 SV=1	0.655906
>sp|P00334|ADH_DROME Alcohol dehydrogenase OS=Drosophila melanogaster OX=7227 GN=Adh PE=1 SV=2	0.177344		>tr|Q9V9U1|Q9V9U1_DROME FI02923p OS=Drosophila melanogaster OX=7227 GN=Smvt PE=2 SV=1	0.654822
>sp|P00334|ADH_DROME Alcohol dehydrogenase OS=Drosophila melanogaster OX=7227 GN=Adh PE=1 SV=2	0.177344		>sp|O18405|SURF4_DROME Surfeit locus protein 4 homolog OS=Drosophila melanogaster OX=7227 GN=Surf4 PE=2 SV=1	0.639259
>sp|P00334|ADH_DROME Alcohol dehydrogenase OS=Drosophila melanogaster OX=7227 GN=Adh PE=1 SV=2	0.177344		>sp|O18405|SURF4_DROME Surfeit locus protein 4 homolog OS=Drosophila melanogaster OX=7227 GN=Surf4 PE=2 SV=1	0.639259
>tr|Q9VWP2|Q9VWP2_DROME RH57257p OS=Drosophila melanogaster OX=7227 GN=Dmel\CG7322 PE=1 SV=1	0.176446		>sp|O18405|SURF4_DROME Surfeit locus protein 4 homolog OS=Drosophila melanogaster OX=7227 GN=Surf4 PE=2 SV=1	0.639259
>tr|Q9VWP2|Q9VWP2_DROME RH57257p OS=Drosophila melanogaster OX=7227 GN=Dmel\CG7322 PE=1 SV=1	0.176446		>tr|Q6IHY5|Q6IHY5_DROME HDC00331 OS=Drosophila melanogaster OX=7227 GN=Dmel\CG34172 PE=1 SV=1	0.617742
>tr|Q9VWP2|Q9VWP2_DROME RH57257p OS=Drosophila melanogaster OX=7227 GN=Dmel\CG7322 PE=1 SV=1	0.176446		>tr|Q6IHY5|Q6IHY5_DROME HDC00331 OS=Drosophila melanogaster OX=7227 GN=Dmel\CG34172 PE=1 SV=1	0.617742
>tr|Q9VU29|Q9VU29_DROME Malate dehydrogenase OS=Drosophila melanogaster OX=7227 GN=Dmel\CG10749 PE=2 SV=1	0.167723		>tr|Q6IHY5|Q6IHY5_DROME HDC00331 OS=Drosophila melanogaster OX=7227 GN=Dmel\CG34172 PE=1 SV=1	0.617742
>tr|Q9VU29|Q9VU29_DROME Malate dehydrogenase OS=Drosophila melanogaster OX=7227 GN=Dmel\CG10749 PE=2 SV=1	0.167723		>tr|Q9VID1|Q9VID1_DROME Tetraspanin OS=Drosophila melanogaster OX=7227 GN=Tsp39D PE=2 SV=3	0.604681
>tr|Q9VU29|Q9VU29_DROME Malate dehydrogenase OS=Drosophila melanogaster OX=7227 GN=Dmel\CG10749 PE=2 SV=1	0.167723		>sp|Q95T12|FLOWR_DROME Calcium channel flower OS=Drosophila melanogaster OX=7227 GN=fwe PE=1 SV=1	0.6
>tr|Q7JUS9|Q7JUS9_DROME MIP16332p OS=Drosophila melanogaster OX=7227 GN=Mpcp1 PE=1 SV=1	0.149198		>sp|Q95T12|FLOWR_DROME Calcium channel flower OS=Drosophila melanogaster OX=7227 GN=fwe PE=1 SV=1	0.6
>sp|O46199|A53E_DROME Accessory gland protein Acp53Ea OS=Drosophila melanogaster OX=7227 GN=Acp53Ea PE=2 SV=1	0.1475		>tr|Q7YTZ0|Q7YTZ0_DROME GH09436p OS=Drosophila melanogaster OX=7227 GN=Dmel\CG7888 PE=2 SV=1	0.598052
>tr|Q9W4U2|Q9W4U2_DROME RH09070p OS=Drosophila melanogaster OX=7227 GN=BcDNA:RH09070 PE=1 SV=2	0.14739		>tr|Q7YTZ0|Q7YTZ0_DROME GH09436p OS=Drosophila melanogaster OX=7227 GN=Dmel\CG7888 PE=2 SV=1	0.598052
>tr|Q9W4U2|Q9W4U2_DROME RH09070p OS=Drosophila melanogaster OX=7227 GN=BcDNA:RH09070 PE=1 SV=2	0.14739		>tr|Q7YTZ0|Q7YTZ0_DROME GH09436p OS=Drosophila melanogaster OX=7227 GN=Dmel\CG7888 PE=2 SV=1	0.598052
>tr|Q9W4U2|Q9W4U2_DROME RH09070p OS=Drosophila melanogaster OX=7227 GN=BcDNA:RH09070 PE=1 SV=2	0.14739		>tr|Q7JV41|Q7JV41_DROME CAAX prenyl protease OS=Drosophila melanogaster OX=7227 GN=ste24c PE=2 SV=1	0.592544
>sp|Q9V429|THIO2_DROME Thioredoxin-2 OS=Drosophila melanogaster OX=7227 GN=Trx-2 PE=1 SV=3	0.142453		>tr|Q8STG9|Q8STG9_DROME DSec61alpha OS=Drosophila melanogaster OX=7227 GN=Sec61alpha PE=1 SV=1	0.579202
>sp|Q95028|LDH_DROME L-lactate dehydrogenase OS=Drosophila melanogaster OX=7227 GN=Ldh PE=2 SV=1	0.140964		>tr|Q8STG9|Q8STG9_DROME DSec61alpha OS=Drosophila melanogaster OX=7227 GN=Sec61alpha PE=1 SV=1	0.579202
>sp|Q95028|LDH_DROME L-lactate dehydrogenase OS=Drosophila melanogaster OX=7227 GN=Ldh PE=2 SV=1	0.140964		>sp|Q9VT04|PATH_DROME Proton-coupled amino acid transporter-like protein pathetic OS=Drosophila melanogaster OX=7227 GN=path PE=1 SV=1	0.572399
>sp|Q95028|LDH_DROME L-lactate dehydrogenase OS=Drosophila melanogaster OX=7227 GN=Ldh PE=2 SV=1	0.140964		>sp|Q9VT04|PATH_DROME Proton-coupled amino acid transporter-like protein pathetic OS=Drosophila melanogaster OX=7227 GN=path PE=1 SV=1	0.572399
>tr|O77425|O77425_DROME Ribokinase OS=Drosophila melanogaster OX=7227 GN=Dmel\CG13369 PE=2 SV=1	0.135855		>tr|Q9W3R0|Q9W3R0_DROME FI02094p OS=Drosophila melanogaster OX=7227 GN=cg9657 PE=2 SV=2	0.562396
>tr|O77425|O77425_DROME Ribokinase OS=Drosophila melanogaster OX=7227 GN=Dmel\CG13369 PE=2 SV=1	0.135855		>tr|Q9W3R0|Q9W3R0_DROME FI02094p OS=Drosophila melanogaster OX=7227 GN=cg9657 PE=2 SV=2	0.562396
>tr|Q9V3F8|Q9V3F8_DROME Pyrroline-5-carboxylate reductase OS=Drosophila melanogaster OX=7227 GN=P5cr PE=1 SV=1	0.134286		>tr|E1JH55|E1JH55_DROME Aquaporin OS=Drosophila melanogaster OX=7227 GN=AQP PE=3 SV=1	0.556767
>tr|Q9V3F8|Q9V3F8_DROME Pyrroline-5-carboxylate reductase OS=Drosophila melanogaster OX=7227 GN=P5cr PE=1 SV=1	0.134286		>tr|E1JH55|E1JH55_DROME Aquaporin OS=Drosophila melanogaster OX=7227 GN=AQP PE=3 SV=1	0.556767
>tr|Q9V3F8|Q9V3F8_DROME Pyrroline-5-carboxylate reductase OS=Drosophila melanogaster OX=7227 GN=P5cr PE=1 SV=1	0.134286		>tr|E1JH55|E1JH55_DROME Aquaporin OS=Drosophila melanogaster OX=7227 GN=AQP PE=3 SV=1	0.556767
>tr|Q8IR95|Q8IR95_DROME GEO09608p1 OS=Drosophila melanogaster OX=7227 GN=ssp7 PE=1 SV=1	0.134091		>tr|B4ZJA1|B4ZJA1_DROME Seminal fluid protein 60F OS=Drosophila melanogaster OX=7227 GN=Sfp60F PE=2 SV=1	0.553968
>sp|Q9VVW8|NNRD_DROME ATP-dependent (S)-NAD(P)H-hydrate dehydratase OS=Drosophila melanogaster OX=7227 GN=Naxd PE=2 SV=1	0.133		>tr|B4ZJA1|B4ZJA1_DROME Seminal fluid protein 60F OS=Drosophila melanogaster OX=7227 GN=Sfp60F PE=2 SV=1	0.553968
>tr|Q9VQT7|Q9VQT7_DROME RH15675p OS=Drosophila melanogaster OX=7227 GN=Dmel\CG16713 PE=1 SV=1	0.131707		>tr|Q9V3E5|Q9V3E5_DROME Tetraspanin OS=Drosophila melanogaster OX=7227 GN=Tsp66E PE=2 SV=1	0.548315
>tr|Q9VDE2|Q9VDE2_DROME Uncharacterized protein, isoform B OS=Drosophila melanogaster OX=7227 GN=Dmel\CG5793 PE=1 SV=3	0.131364		>tr|Q7JVN6|Q7JVN6_DROME GH17672p OS=Drosophila melanogaster OX=7227 GN=CT30783 PE=1 SV=1	0.547251
>tr|Q9VDE2|Q9VDE2_DROME Uncharacterized protein, isoform B OS=Drosophila melanogaster OX=7227 GN=Dmel\CG5793 PE=1 SV=3	0.131364		>tr|Q7JVN6|Q7JVN6_DROME GH17672p OS=Drosophila melanogaster OX=7227 GN=CT30783 PE=1 SV=1	0.547251
>tr|Q9VT15|Q9VT15_DROME GH14734p OS=Drosophila melanogaster OX=7227 GN=Dmel\CG3088 PE=2 SV=1	0.131349		>tr|Q9VU35|Q9VU35_DROME RH34413p OS=Drosophila melanogaster OX=7227 GN=Dmel\CG11267 PE=1 SV=1	0.543689
>tr|Q9VT15|Q9VT15_DROME GH14734p OS=Drosophila melanogaster OX=7227 GN=Dmel\CG3088 PE=2 SV=1	0.131349		>sp|Q9VES1|AR6P1_DROME ARL-6-interacting protein 1 homolog OS=Drosophila melanogaster OX=7227 GN=CG10326 PE=2 SV=1	0.543655
>tr|Q9VT15|Q9VT15_DROME GH14734p OS=Drosophila melanogaster OX=7227 GN=Dmel\CG3088 PE=2 SV=1	0.131349		>sp|Q9VES1|AR6P1_DROME ARL-6-interacting protein 1 homolog OS=Drosophila melanogaster OX=7227 GN=CG10326 PE=2 SV=1	0.543655
>tr|Q9VRS4|Q9VRS4_DROME Machete OS=Drosophila melanogaster OX=7227 GN=yip7 PE=1 SV=1	0.131111		>sp|Q9VES1|AR6P1_DROME ARL-6-interacting protein 1 homolog OS=Drosophila melanogaster OX=7227 GN=CG10326 PE=2 SV=1	0.543655
>tr|Q9W258|Q9W258_DROME Babos, isoform A OS=Drosophila melanogaster OX=7227 GN=babos PE=2 SV=2	0.121939		>sp|Q9VVT2|INDY1_DROME Protein I'm not dead yet OS=Drosophila melanogaster OX=7227 GN=Indy PE=2 SV=2	0.540508
>tr|Q6IHT7|Q6IHT7_DROME HDC01001 OS=Drosophila melanogaster OX=7227 GN=Sfp26Ad PE=4 SV=1	0.112397		>sp|Q9VVT2|INDY1_DROME Protein I'm not dead yet OS=Drosophila melanogaster OX=7227 GN=Indy PE=2 SV=2	0.540508
>sp|Q9V8M5|3HIDH_DROME Probable 3-hydroxyisobutyrate dehydrogenase, mitochondrial OS=Drosophila melanogaster OX=7227 GN=CG15093 PE=2 SV=2	0.112037		>tr|Q7K1D7|Q7K1D7_DROME GH15861p OS=Drosophila melanogaster OX=7227 GN=Dmel\CG1358 PE=1 SV=1	0.534647
>sp|Q9V8M5|3HIDH_DROME Probable 3-hydroxyisobutyrate dehydrogenase, mitochondrial OS=Drosophila melanogaster OX=7227 GN=CG15093 PE=2 SV=2	0.112037		>tr|Q7K1D7|Q7K1D7_DROME GH15861p OS=Drosophila melanogaster OX=7227 GN=Dmel\CG1358 PE=1 SV=1	0.534647
>sp|Q9V8M5|3HIDH_DROME Probable 3-hydroxyisobutyrate dehydrogenase, mitochondrial OS=Drosophila melanogaster OX=7227 GN=CG15093 PE=2 SV=2	0.112037		>sp|P00417|COX3_DROME Cytochrome c oxidase subunit 3 OS=Drosophila melanogaster OX=7227 GN=mt:CoIII PE=3 SV=1	0.533969
>tr|H5V8B8|H5V8B8_DROME MIP33436p1 OS=Drosophila melanogaster OX=7227 GN=Pp2A-29B PE=1 SV=1	0.110769		>sp|P00417|COX3_DROME Cytochrome c oxidase subunit 3 OS=Drosophila melanogaster OX=7227 GN=mt:CoIII PE=3 SV=1	0.533969
>tr|H5V8B8|H5V8B8_DROME MIP33436p1 OS=Drosophila melanogaster OX=7227 GN=Pp2A-29B PE=1 SV=1	0.110769		>sp|Q9VDD7|S35B1_DROME Solute carrier family 35 member B1 homolog OS=Drosophila melanogaster OX=7227 GN=meigo PE=2 SV=1	0.533432
>tr|H5V8B8|H5V8B8_DROME MIP33436p1 OS=Drosophila melanogaster OX=7227 GN=Pp2A-29B PE=1 SV=1	0.110769		>tr|Q9VV21|Q9VV21_DROME GEO07736p1 OS=Drosophila melanogaster OX=7227 GN=Dmel\CG4962 PE=2 SV=1	0.529268
>tr|Q9VKI8|Q9VKI8_DROME GH03305p OS=Drosophila melanogaster OX=7227 GN=GH26 PE=1 SV=1	0.109036		>tr|Q9VS47|Q9VS47_DROME LD39967p OS=Drosophila melanogaster OX=7227 GN=mrva PE=2 SV=1	0.514854
>tr|Q9VKI8|Q9VKI8_DROME GH03305p OS=Drosophila melanogaster OX=7227 GN=GH26 PE=1 SV=1	0.109036		>tr|Q9VS47|Q9VS47_DROME LD39967p OS=Drosophila melanogaster OX=7227 GN=mrva PE=2 SV=1	0.514854
>tr|Q9VKI8|Q9VKI8_DROME GH03305p OS=Drosophila melanogaster OX=7227 GN=GH26 PE=1 SV=1	0.109036		>tr|Q961H2|Q961H2_DROME GH23453p OS=Drosophila melanogaster OX=7227 GN=CG8054 PE=1 SV=1	0.514004
>tr|Q9W370|Q9W370_DROME GEO12084p1 OS=Drosophila melanogaster OX=7227 GN=Dmel\CG15369 PE=1 SV=1	0.105738		>sp|Q23982|PEB2_DROME Ejaculatory bulb-specific protein 2 OS=Drosophila melanogaster OX=7227 GN=EbpII PE=2 SV=2	0.513636
>tr|Q9W370|Q9W370_DROME GEO12084p1 OS=Drosophila melanogaster OX=7227 GN=Dmel\CG15369 PE=1 SV=1	0.105738		>sp|Q23982|PEB2_DROME Ejaculatory bulb-specific protein 2 OS=Drosophila melanogaster OX=7227 GN=EbpII PE=2 SV=2	0.513636
>tr|Q9W370|Q9W370_DROME GEO12084p1 OS=Drosophila melanogaster OX=7227 GN=Dmel\CG15369 PE=1 SV=1	0.105738		>tr|X2JFT8|X2JFT8_DROME Uncharacterized protein, isoform C OS=Drosophila melanogaster OX=7227 GN=Dmel\CG4928 PE=1 SV=1	0.507677
>sp|P22700|ATC1_DROME Calcium-transporting ATPase sarcoplasmic/endoplasmic reticulum type OS=Drosophila melanogaster OX=7227 GN=SERCA PE=1 SV=2	0.10451		>tr|X2JFT8|X2JFT8_DROME Uncharacterized protein, isoform C OS=Drosophila melanogaster OX=7227 GN=Dmel\CG4928 PE=1 SV=1	0.507677
>sp|P56538|IF6_DROME Eukaryotic translation initiation factor 6 OS=Drosophila melanogaster OX=7227 GN=eIF6 PE=2 SV=3	0.0991837		>tr|Q8SY97|Q8SY97_DROME GEO08264p1 OS=Drosophila melanogaster OX=7227 GN=Dmel\CG33178 PE=2 SV=1	0.506667
>sp|P56538|IF6_DROME Eukaryotic translation initiation factor 6 OS=Drosophila melanogaster OX=7227 GN=eIF6 PE=2 SV=3	0.0991837		>sp|Q8SX37|CDIPT_DROME CDP-diacylglycerol--inositol 3-phosphatidyltransferase OS=Drosophila melanogaster OX=7227 GN=Pis PE=1 SV=1	0.505804
>tr|Q9VEB1|Q9VEB1_DROME IP09655p OS=Drosophila melanogaster OX=7227 GN=Mdh2 PE=1 SV=1	0.0991071		>sp|Q8SX37|CDIPT_DROME CDP-diacylglycerol--inositol 3-phosphatidyltransferase OS=Drosophila melanogaster OX=7227 GN=Pis PE=1 SV=1	0.505804
>tr|Q9VEB1|Q9VEB1_DROME IP09655p OS=Drosophila melanogaster OX=7227 GN=Mdh2 PE=1 SV=1	0.0991071		>tr|Q9VXG9|Q9VXG9_DROME GH25683p OS=Drosophila melanogaster OX=7227 GN=Dmel\CG4239 PE=2 SV=1	0.494565
>tr|Q9VEB1|Q9VEB1_DROME IP09655p OS=Drosophila melanogaster OX=7227 GN=Mdh2 PE=1 SV=1	0.0991071		>tr|Q9VXG9|Q9VXG9_DROME GH25683p OS=Drosophila melanogaster OX=7227 GN=Dmel\CG4239 PE=2 SV=1	0.494565
>sp|O18404|HCD2_DROME 3-hydroxyacyl-CoA dehydrogenase type-2 OS=Drosophila melanogaster OX=7227 GN=scu PE=1 SV=1	0.0984314		>tr|Q9VXG9|Q9VXG9_DROME GH25683p OS=Drosophila melanogaster OX=7227 GN=Dmel\CG4239 PE=2 SV=1	0.494565
>sp|O18404|HCD2_DROME 3-hydroxyacyl-CoA dehydrogenase type-2 OS=Drosophila melanogaster OX=7227 GN=scu PE=1 SV=1	0.0984314		>tr|Q9V3X2|Q9V3X2_DROME Tetraspanin OS=Drosophila melanogaster OX=7227 GN=Tsp96F PE=1 SV=1	0.48806
>sp|O18404|HCD2_DROME 3-hydroxyacyl-CoA dehydrogenase type-2 OS=Drosophila melanogaster OX=7227 GN=scu PE=1 SV=1	0.0984314		>tr|Q9V3X2|Q9V3X2_DROME Tetraspanin OS=Drosophila melanogaster OX=7227 GN=Tsp96F PE=1 SV=1	0.48806
>tr|M9NEV7|M9NEV7_DROME Uncharacterized protein, isoform B OS=Drosophila melanogaster OX=7227 GN=BcDNA:RE71975 PE=1 SV=1	0.0973913		>tr|Q8IMC1|Q8IMC1_DROME Transporter OS=Drosophila melanogaster OX=7227 GN=Gat PE=1 SV=2	0.484055
>tr|M9NEV7|M9NEV7_DROME Uncharacterized protein, isoform B OS=Drosophila melanogaster OX=7227 GN=BcDNA:RE71975 PE=1 SV=1	0.0973913		>tr|Q9VXV4|Q9VXV4_DROME RH04535p OS=Drosophila melanogaster OX=7227 GN=Dmel\CG11655 PE=1 SV=1	0.477363
>tr|Q9VL70|Q9VL70_DROME HL08109p OS=Drosophila melanogaster OX=7227 GN=yip2 PE=1 SV=1	0.0952261		>tr|Q9VXV4|Q9VXV4_DROME RH04535p OS=Drosophila melanogaster OX=7227 GN=Dmel\CG11655 PE=1 SV=1	0.477363
>tr|Q9VL70|Q9VL70_DROME HL08109p OS=Drosophila melanogaster OX=7227 GN=yip2 PE=1 SV=1	0.0952261		>tr|Q9VXV4|Q9VXV4_DROME RH04535p OS=Drosophila melanogaster OX=7227 GN=Dmel\CG11655 PE=1 SV=1	0.477363
>tr|Q9VL70|Q9VL70_DROME HL08109p OS=Drosophila melanogaster OX=7227 GN=yip2 PE=1 SV=1	0.0952261		>tr|Q5LJX8|Q5LJX8_DROME Zydeco, isoform F OS=Drosophila melanogaster OX=7227 GN=zyd PE=3 SV=3	0.476937
>tr|Q9VRT2|Q9VRT2_DROME RE65433p OS=Drosophila melanogaster OX=7227 GN=Dmel\CG10472 PE=1 SV=1	0.0934483		>tr|Q9VBK1|Q9VBK1_DROME LP24461p OS=Drosophila melanogaster OX=7227 GN=CG14539 PE=2 SV=3	0.468338
>tr|O97479|O97479_DROME FI05212p OS=Drosophila melanogaster OX=7227 GN=Sodh-1 PE=1 SV=1	0.0877778		>tr|Q9VBK1|Q9VBK1_DROME LP24461p OS=Drosophila melanogaster OX=7227 GN=CG14539 PE=2 SV=3	0.468338
>tr|O97479|O97479_DROME FI05212p OS=Drosophila melanogaster OX=7227 GN=Sodh-1 PE=1 SV=1	0.0877778		>tr|Q9VKD2|Q9VKD2_DROME Very-long-chain (3R)-3-hydroxyacyl-CoA dehydratase OS=Drosophila melanogaster OX=7227 GN=Hacd1 PE=1 SV=1	0.466939
>tr|Q7KE33|Q7KE33_DROME Odorant binding protein c OS=Drosophila melanogaster OX=7227 GN=Obp51a PE=2 SV=1	0.0846154		>tr|Q9VKD2|Q9VKD2_DROME Very-long-chain (3R)-3-hydroxyacyl-CoA dehydratase OS=Drosophila melanogaster OX=7227 GN=Hacd1 PE=1 SV=1	0.466939
>tr|Q7KE33|Q7KE33_DROME Odorant binding protein c OS=Drosophila melanogaster OX=7227 GN=Obp51a PE=2 SV=1	0.0846154		>tr|Q9VR44|Q9VR44_DROME GH05102p OS=Drosophila melanogaster OX=7227 GN=CT10168 PE=1 SV=1	0.466126
>tr|Q7KE33|Q7KE33_DROME Odorant binding protein c OS=Drosophila melanogaster OX=7227 GN=Obp51a PE=2 SV=1	0.0846154		>tr|Q9VR44|Q9VR44_DROME GH05102p OS=Drosophila melanogaster OX=7227 GN=CT10168 PE=1 SV=1	0.466126
>tr|Q9VRD0|Q9VRD0_DROME RE66795p OS=Drosophila melanogaster OX=7227 GN=Ser6 PE=2 SV=1	0.0818533		>tr|Q7JZY1|Q7JZY1_DROME RE06389p OS=Drosophila melanogaster OX=7227 GN=Dmel\CG2310 PE=1 SV=1	0.465339
>tr|Q9VK99|Q9VK99_DROME Atilla, isoform B OS=Drosophila melanogaster OX=7227 GN=atilla PE=4 SV=3	0.0776224		>tr|Q9VHF5|Q9VHF5_DROME LD42595p OS=Drosophila melanogaster OX=7227 GN=pasi2 PE=2 SV=1	0.458527
>tr|Q8SXR1|Q8SXR1_DROME Neural lazarillo, isoform A OS=Drosophila melanogaster OX=7227 GN=NLaz PE=1 SV=1	0.0767857		>tr|Q9VHF5|Q9VHF5_DROME LD42595p OS=Drosophila melanogaster OX=7227 GN=pasi2 PE=2 SV=1	0.458527
>tr|Q8SXR1|Q8SXR1_DROME Neural lazarillo, isoform A OS=Drosophila melanogaster OX=7227 GN=NLaz PE=1 SV=1	0.0767857		>tr|Q9VHF5|Q9VHF5_DROME LD42595p OS=Drosophila melanogaster OX=7227 GN=pasi2 PE=2 SV=1	0.458527
>tr|Q9VSU6|Q9VSU6_DROME Dihydropteridine reductase OS=Drosophila melanogaster OX=7227 GN=Dhpr PE=1 SV=1	0.0702128		>sp|Q9W1K0|TM14_DROME Transmembrane protein 14 homolog OS=Drosophila melanogaster OX=7227 GN=CG5532 PE=3 SV=1	0.458036
>tr|Q9VSU6|Q9VSU6_DROME Dihydropteridine reductase OS=Drosophila melanogaster OX=7227 GN=Dhpr PE=1 SV=1	0.0702128		>tr|Q6GUT7|Q6GUT7_DROME ACP53C14A OS=Drosophila melanogaster OX=7227 GN=Acp53C14a PE=2 SV=1	0.456198
>tr|Q9VSU6|Q9VSU6_DROME Dihydropteridine reductase OS=Drosophila melanogaster OX=7227 GN=Dhpr PE=1 SV=1	0.0702128		>tr|Q6GUT7|Q6GUT7_DROME ACP53C14A OS=Drosophila melanogaster OX=7227 GN=Acp53C14a PE=2 SV=1	0.456198
>sp|P12613|TCPA_DROME T-complex protein 1 subunit alpha OS=Drosophila melanogaster OX=7227 GN=CCT1 PE=2 SV=2	0.0698384		>tr|Q6GUT7|Q6GUT7_DROME ACP53C14A OS=Drosophila melanogaster OX=7227 GN=Acp53C14a PE=2 SV=1	0.456198
>tr|A0A0B4LGB7|A0A0B4LGB7_DROME Calcium-transporting ATPase OS=Drosophila melanogaster OX=7227 GN=SERCA PE=1 SV=1	0.0691692		>sp|Q9VZE7|CTLH1_DROME CTL-like protein 1 OS=Drosophila melanogaster OX=7227 GN=CG1311 PE=2 SV=1	0.45152
>tr|A0A0B4LGB7|A0A0B4LGB7_DROME Calcium-transporting ATPase OS=Drosophila melanogaster OX=7227 GN=SERCA PE=1 SV=1	0.0691692		>sp|Q9VZE7|CTLH1_DROME CTL-like protein 1 OS=Drosophila melanogaster OX=7227 GN=CG1311 PE=2 SV=1	0.45152
>sp|Q24439|ATPO_DROME ATP synthase subunit O, mitochondrial OS=Drosophila melanogaster OX=7227 GN=ATPsynO PE=2 SV=2	0.0617225		>tr|Q9VZ34|Q9VZ34_DROME RH72958p OS=Drosophila melanogaster OX=7227 GN=Dmel\CG2076 PE=1 SV=1	0.45044
>sp|Q24439|ATPO_DROME ATP synthase subunit O, mitochondrial OS=Drosophila melanogaster OX=7227 GN=ATPsynO PE=2 SV=2	0.0617225		>tr|Q9VZ34|Q9VZ34_DROME RH72958p OS=Drosophila melanogaster OX=7227 GN=Dmel\CG2076 PE=1 SV=1	0.45044
>sp|Q24439|ATPO_DROME ATP synthase subunit O, mitochondrial OS=Drosophila melanogaster OX=7227 GN=ATPsynO PE=2 SV=2	0.0617225		>sp|Q9VE46|SC5A7_DROME High-affinity choline transporter 1 OS=Drosophila melanogaster OX=7227 GN=CG7708 PE=2 SV=2	0.449186
>sp|P46415|ADHX_DROME Alcohol dehydrogenase class-3 OS=Drosophila melanogaster OX=7227 GN=Fdh PE=1 SV=3	0.0614776		>sp|Q9VE46|SC5A7_DROME High-affinity choline transporter 1 OS=Drosophila melanogaster OX=7227 GN=ChT PE=2 SV=2	0.449186
>sp|P46415|ADHX_DROME Alcohol dehydrogenase class-3 OS=Drosophila melanogaster OX=7227 GN=Fdh PE=1 SV=3	0.0614776		>tr|O77062|O77062_DROME Amino acid transporter OS=Drosophila melanogaster OX=7227 GN=Eaat1 PE=1 SV=1	0.448017
>sp|P46415|ADHX_DROME Alcohol dehydrogenase class-3 OS=Drosophila melanogaster OX=7227 GN=Fdh PE=1 SV=3	0.0614776		>tr|O77062|O77062_DROME Amino acid transporter OS=Drosophila melanogaster OX=7227 GN=Eaat1 PE=1 SV=1	0.448017
>tr|Q9VDC0|Q9VDC0_DROME GH01837p OS=Drosophila melanogaster OX=7227 GN=FOHSDR PE=1 SV=1	0.0608		>tr|O77062|O77062_DROME Amino acid transporter OS=Drosophila melanogaster OX=7227 GN=Eaat1 PE=1 SV=1	0.448017
>tr|Q9VDC0|Q9VDC0_DROME GH01837p OS=Drosophila melanogaster OX=7227 GN=FOHSDR PE=1 SV=1	0.0608		>tr|Q9V4E7|Q9V4E7_DROME Transporter OS=Drosophila melanogaster OX=7227 GN=Gat PE=1 SV=4	0.437579
>tr|Q9VDC0|Q9VDC0_DROME GH01837p OS=Drosophila melanogaster OX=7227 GN=FOHSDR PE=1 SV=1	0.0608		>tr|Q9V4E7|Q9V4E7_DROME Transporter OS=Drosophila melanogaster OX=7227 GN=Gat PE=1 SV=4	0.437579
>tr|Q9VZ19|Q9VZ19_DROME Antdh OS=Drosophila melanogaster OX=7227 GN=antdh PE=1 SV=1	0.0604		>tr|Q9VTF5|Q9VTF5_DROME RE42071p OS=Drosophila melanogaster OX=7227 GN=Dmel\CG7638 PE=2 SV=2	0.436492
>tr|A1ZB73|A1ZB73_DROME Glutathione S transferase E8, isoform A OS=Drosophila melanogaster OX=7227 GN=GstE8 PE=4 SV=1	0.0603604		>tr|Q9VZE2|Q9VZE2_DROME GEO04055p1 OS=Drosophila melanogaster OX=7227 GN=Dmel\CG15012 PE=1 SV=2	0.433553
>tr|Q9VU35|Q9VU35_DROME RH34413p OS=Drosophila melanogaster OX=7227 GN=Dmel\CG11267 PE=1 SV=1	0.0543689		>tr|Q9VZE2|Q9VZE2_DROME GEO04055p1 OS=Drosophila melanogaster OX=7227 GN=Dmel\CG15012 PE=1 SV=2	0.433553
>tr|Q9VU35|Q9VU35_DROME RH34413p OS=Drosophila melanogaster OX=7227 GN=Dmel\CG11267 PE=1 SV=1	0.0543689		>tr|Q7K1I4|Q7K1I4_DROME Tetraspanin OS=Drosophila melanogaster OX=7227 GN=Tsp42Ea PE=1 SV=1	0.425664
>tr|Q9VKX2|Q9VKX2_DROME Malate dehydrogenase OS=Drosophila melanogaster OX=7227 GN=Mdh1 PE=1 SV=2	0.0540059		>tr|Q7K1I4|Q7K1I4_DROME Tetraspanin OS=Drosophila melanogaster OX=7227 GN=Tsp42Ea PE=1 SV=1	0.425664
>tr|Q9VKX2|Q9VKX2_DROME Malate dehydrogenase OS=Drosophila melanogaster OX=7227 GN=Mdh1 PE=1 SV=2	0.0540059		>tr|Q7K1I4|Q7K1I4_DROME Tetraspanin OS=Drosophila melanogaster OX=7227 GN=Tsp42Ea PE=1 SV=1	0.425664
>tr|Q9VKX2|Q9VKX2_DROME Malate dehydrogenase OS=Drosophila melanogaster OX=7227 GN=Mdh1 PE=1 SV=2	0.0540059		>sp|P00408|COX2_DROME Cytochrome c oxidase subunit 2 OS=Drosophila melanogaster OX=7227 GN=mt:CoII PE=3 SV=1	0.410526
>sp|Q9W3C7|PPT1_DROME Palmitoyl-protein thioesterase 1 OS=Drosophila melanogaster OX=7227 GN=Ppt1 PE=2 SV=2	0.0528662		>sp|P00408|COX2_DROME Cytochrome c oxidase subunit 2 OS=Drosophila melanogaster OX=7227 GN=mt:CoII PE=3 SV=1	0.410526
>tr|A0A0B4KHI6|A0A0B4KHI6_DROME Uncharacterized protein, isoform C OS=Drosophila melanogaster OX=7227 GN=BcDNA:RH02566 PE=1 SV=1	0.0525424		>sp|P00408|COX2_DROME Cytochrome c oxidase subunit 2 OS=Drosophila melanogaster OX=7227 GN=mt:CoII PE=3 SV=1	0.410526
>tr|A0A0B4KHI6|A0A0B4KHI6_DROME Uncharacterized protein, isoform C OS=Drosophila melanogaster OX=7227 GN=BcDNA:RH02566 PE=1 SV=1	0.0525424		>tr|M9PG89|M9PG89_DROME Uncharacterized protein, isoform B OS=Drosophila melanogaster OX=7227 GN=Dmel\CG13077 PE=4 SV=1	0.40708
>sp|Q26365|ADT_DROME ADP,ATP carrier protein OS=Drosophila melanogaster OX=7227 GN=sesB PE=2 SV=4	0.050641		>tr|Q9VLY1|Q9VLY1_DROME HL02931p OS=Drosophila melanogaster OX=7227 GN=Dmel\CG7214 PE=2 SV=1	0.406338
>sp|Q26365|ADT_DROME ADP,ATP carrier protein OS=Drosophila melanogaster OX=7227 GN=sesB PE=2 SV=4	0.050641		>tr|Q9VQA3|Q9VQA3_DROME Uncharacterized protein, isoform A OS=Drosophila melanogaster OX=7227 GN=anon-SAGE:Wang-110 PE=4 SV=1	0.396735
>sp|Q26365|ADT_DROME ADP,ATP carrier protein OS=Drosophila melanogaster OX=7227 GN=sesB PE=2 SV=4	0.050641		>tr|Q9VQA3|Q9VQA3_DROME Uncharacterized protein, isoform A OS=Drosophila melanogaster OX=7227 GN=anon-SAGE:Wang-110 PE=4 SV=1	0.396735
>tr|Q9VA42|Q9VA42_DROME Niemann-Pick type C-2g, isoform A OS=Drosophila melanogaster OX=7227 GN=Npc2g PE=1 SV=1	0.0490566		>tr|Q9VQA3|Q9VQA3_DROME Uncharacterized protein, isoform A OS=Drosophila melanogaster OX=7227 GN=anon-SAGE:Wang-110 PE=4 SV=1	0.396735
>tr|Q9VA42|Q9VA42_DROME Niemann-Pick type C-2g, isoform A OS=Drosophila melanogaster OX=7227 GN=Npc2g PE=1 SV=1	0.0490566		>sp|Q9VWE9|S61G2_DROME Protein transport protein Sec61 gamma-2 subunit OS=Drosophila melanogaster OX=7227 GN=Sec61gamma PE=3 SV=1	0.394118
>tr|Q9VA42|Q9VA42_DROME Niemann-Pick type C-2g, isoform A OS=Drosophila melanogaster OX=7227 GN=Npc2g PE=1 SV=1	0.0490566		>sp|Q9W4C5|NAAT1_DROME Sodium-dependent nutrient amino acid transporter 1 OS=Drosophila melanogaster OX=7227 GN=NAAT1 PE=1 SV=2	0.391264
>tr|Q7KNR7|Q7KNR7_DROME Photoreceptor dehydrogenase, isoform C OS=Drosophila melanogaster OX=7227 GN=Pdh PE=1 SV=1	0.0490421		>tr|A1Z9D9|A1Z9D9_DROME Bb in a boxcar, isoform A OS=Drosophila melanogaster OX=7227 GN=bbc PE=1 SV=1	0.381055
>tr|Q7KNR7|Q7KNR7_DROME Photoreceptor dehydrogenase, isoform C OS=Drosophila melanogaster OX=7227 GN=Pdh PE=1 SV=1	0.0490421		>tr|A1Z9D9|A1Z9D9_DROME Bb in a boxcar, isoform A OS=Drosophila melanogaster OX=7227 GN=bbc PE=1 SV=1	0.381055
>sp|Q01604|PGK_DROME Phosphoglycerate kinase OS=Drosophila melanogaster OX=7227 GN=Pgk PE=2 SV=2	0.0489157		>tr|Q961R9|Q961R9_DROME GH09241p OS=Drosophila melanogaster OX=7227 GN=CT19169 PE=1 SV=1	0.37964
>sp|Q01604|PGK_DROME Phosphoglycerate kinase OS=Drosophila melanogaster OX=7227 GN=Pgk PE=2 SV=2	0.0489157		>tr|Q961R9|Q961R9_DROME GH09241p OS=Drosophila melanogaster OX=7227 GN=CT19169 PE=1 SV=1	0.37964
>sp|Q01604|PGK_DROME Phosphoglycerate kinase OS=Drosophila melanogaster OX=7227 GN=Pgk PE=2 SV=2	0.0489157		>tr|Q961R9|Q961R9_DROME GH09241p OS=Drosophila melanogaster OX=7227 GN=CT19169 PE=1 SV=1	0.37964
>tr|Q9W0L3|Q9W0L3_DROME Uncharacterized protein OS=Drosophila melanogaster OX=7227 GN=Dmel\CG13905 PE=4 SV=2	0.0483193		>sp|Q9VQ57|DERL1_DROME Derlin-1 OS=Drosophila melanogaster OX=7227 GN=Der-1 PE=2 SV=1	0.373469
>tr|Q0E9G4|Q0E9G4_DROME CG1600-PA OS=Drosophila melanogaster OX=7227 GN=Drat PE=1 SV=1	0.0464567		>tr|Q9VE26|Q9VE26_DROME Uncharacterized protein OS=Drosophila melanogaster OX=7227 GN=Dmel\CG14292 PE=4 SV=1	0.373214
>tr|Q0E9G4|Q0E9G4_DROME CG1600-PA OS=Drosophila melanogaster OX=7227 GN=Drat PE=1 SV=1	0.0464567		>tr|Q9VU17|Q9VU17_DROME HL01062p OS=Drosophila melanogaster OX=7227 GN=CT30701 PE=1 SV=1	0.3718
>tr|Q0E9G4|Q0E9G4_DROME CG1600-PA OS=Drosophila melanogaster OX=7227 GN=Drat PE=1 SV=1	0.0464567		>tr|Q9VU17|Q9VU17_DROME HL01062p OS=Drosophila melanogaster OX=7227 GN=CT30701 PE=1 SV=1	0.3718
>tr|Q9VV75|Q9VV75_DROME AT02348p OS=Drosophila melanogaster OX=7227 GN=UQCR-C2 PE=1 SV=1	0.0447727		>tr|Q9W3W7|Q9W3W7_DROME LP14756p OS=Drosophila melanogaster OX=7227 GN=Dmel\CG14439 PE=2 SV=1	0.371589
>tr|Q9VV75|Q9VV75_DROME AT02348p OS=Drosophila melanogaster OX=7227 GN=UQCR-C2 PE=1 SV=1	0.0447727		>sp|P06002|OPS1_DROME Opsin Rh1 OS=Drosophila melanogaster OX=7227 GN=ninaE PE=1 SV=1	0.370777
>tr|Q9VV75|Q9VV75_DROME AT02348p OS=Drosophila melanogaster OX=7227 GN=UQCR-C2 PE=1 SV=1	0.0447727		>sp|P06002|OPS1_DROME Opsin Rh1 OS=Drosophila melanogaster OX=7227 GN=ninaE PE=1 SV=1	0.370777
>sp|P13706|GPDA_DROME Glycerol-3-phosphate dehydrogenase [NAD(+)], cytoplasmic OS=Drosophila melanogaster OX=7227 GN=Gpdh PE=1 SV=3	0.0438017		>sp|P06002|OPS1_DROME Opsin Rh1 OS=Drosophila melanogaster OX=7227 GN=ninaE PE=1 SV=1	0.370777
>sp|P13706|GPDA_DROME Glycerol-3-phosphate dehydrogenase [NAD(+)], cytoplasmic OS=Drosophila melanogaster OX=7227 GN=Gpdh PE=1 SV=3	0.0438017		>tr|Q8IR72|Q8IR72_DROME FI19011p1 OS=Drosophila melanogaster OX=7227 GN=Dmel\CG32638 PE=1 SV=2	0.359119
>sp|P13706|GPDA_DROME Glycerol-3-phosphate dehydrogenase [NAD(+)], cytoplasmic OS=Drosophila melanogaster OX=7227 GN=Gpdh PE=1 SV=3	0.0438017		>tr|Q8IR72|Q8IR72_DROME FI19011p1 OS=Drosophila melanogaster OX=7227 GN=Dmel\CG32638 PE=1 SV=2	0.359119
>tr|Q7K5K3|Q7K5K3_DROME Pyruvate dehydrogenase E1 component subunit beta OS=Drosophila melanogaster OX=7227 GN=Pdhb PE=1 SV=1	0.0413699		>tr|Q8IR72|Q8IR72_DROME FI19011p1 OS=Drosophila melanogaster OX=7227 GN=Dmel\CG32638 PE=1 SV=2	0.359119
>tr|Q7K5K3|Q7K5K3_DROME Pyruvate dehydrogenase E1 component subunit beta OS=Drosophila melanogaster OX=7227 GN=Pdhb PE=1 SV=1	0.0413699		>tr|Q9VPQ7|Q9VPQ7_DROME SD07518p OS=Drosophila melanogaster OX=7227 GN=Spp PE=1 SV=1	0.344216
>tr|Q7K5K3|Q7K5K3_DROME Pyruvate dehydrogenase E1 component subunit beta OS=Drosophila melanogaster OX=7227 GN=Pdhb PE=1 SV=1	0.0413699		>tr|Q9VPQ7|Q9VPQ7_DROME SD07518p OS=Drosophila melanogaster OX=7227 GN=Spp PE=1 SV=1	0.344216
>sp|Q9V3W0|UK114_DROME RutC family protein UK114 OS=Drosophila melanogaster OX=7227 GN=UK114 PE=2 SV=1	0.0405797		>tr|Q9VII1|Q9VII1_DROME FI02856p OS=Drosophila melanogaster OX=7227 GN=Dmel\CG9336 PE=1 SV=1	0.341216
>sp|Q9V3W0|UK114_DROME RutC family protein UK114 OS=Drosophila melanogaster OX=7227 GN=UK114 PE=2 SV=1	0.0405797		>tr|Q9VII1|Q9VII1_DROME FI02856p OS=Drosophila melanogaster OX=7227 GN=Dmel\CG9336 PE=1 SV=1	0.341216
>sp|Q9V3W0|UK114_DROME RutC family protein UK114 OS=Drosophila melanogaster OX=7227 GN=UK114 PE=2 SV=1	0.0405797		>tr|Q9VIH9|Q9VIH9_DROME GEO04151p1 OS=Drosophila melanogaster OX=7227 GN=BcDNA:GH07967 PE=2 SV=1	0.337415
>tr|Q9VII5|Q9VII5_DROME GEO08323p1 OS=Drosophila melanogaster OX=7227 GN=Dmel\CG31676 PE=2 SV=3	0.0396226		>sp|Q7K1V5|JAGN_DROME Protein jagunal OS=Drosophila melanogaster OX=7227 GN=jagn PE=1 SV=1	0.334518
>sp|Q8SY61|OB56D_DROME General odorant-binding protein 56d OS=Drosophila melanogaster OX=7227 GN=Obp56d PE=1 SV=2	0.0381679		>tr|Q9VGS3|Q9VGS3_DROME RH44771p OS=Drosophila melanogaster OX=7227 GN=SdhC PE=1 SV=2	0.32807
>sp|Q8SY61|OB56D_DROME General odorant-binding protein 56d OS=Drosophila melanogaster OX=7227 GN=Obp56d PE=1 SV=2	0.0381679		>tr|Q9VGS3|Q9VGS3_DROME RH44771p OS=Drosophila melanogaster OX=7227 GN=SdhC PE=1 SV=2	0.32807
>sp|Q8SY61|OB56D_DROME General odorant-binding protein 56d OS=Drosophila melanogaster OX=7227 GN=Obp56d PE=1 SV=2	0.0381679		>tr|Q9VGS3|Q9VGS3_DROME RH44771p OS=Drosophila melanogaster OX=7227 GN=SdhC PE=1 SV=2	0.32807
>tr|Q9W3N9|Q9W3N9_DROME LD24105p OS=Drosophila melanogaster OX=7227 GN=154229_at PE=1 SV=1	0.0363415		>tr|A1Z8J8|A1Z8J8_DROME Peptidase S1 domain-containing protein OS=Drosophila melanogaster OX=7227 GN=Dmel\CG30025 PE=3 SV=1	0.326482
>tr|Q9W3N9|Q9W3N9_DROME LD24105p OS=Drosophila melanogaster OX=7227 GN=154229_at PE=1 SV=1	0.0363415		>tr|A1Z8J8|A1Z8J8_DROME Peptidase S1 domain-containing protein OS=Drosophila melanogaster OX=7227 GN=Dmel\CG30025 PE=3 SV=1	0.326482
>tr|Q9W3N9|Q9W3N9_DROME LD24105p OS=Drosophila melanogaster OX=7227 GN=154229_at PE=1 SV=1	0.0363415		>tr|M9PHM0|M9PHM0_DROME Uncharacterized protein, isoform B OS=Drosophila melanogaster OX=7227 GN=Dmel\CG12531 PE=4 SV=1	0.323921
>sp|Q9U6L5|PEB1_DROME Ejaculatory bulb-specific protein 1 OS=Drosophila melanogaster OX=7227 GN=Ebp PE=1 SV=1	0.0360743		>tr|M9PHM0|M9PHM0_DROME Uncharacterized protein, isoform B OS=Drosophila melanogaster OX=7227 GN=Dmel\CG12531 PE=4 SV=1	0.323921
>sp|Q9U6L5|PEB1_DROME Ejaculatory bulb-specific protein 1 OS=Drosophila melanogaster OX=7227 GN=Ebp PE=1 SV=1	0.0360743		>tr|Q5BIE4|Q5BIE4_DROME RE40577p OS=Drosophila melanogaster OX=7227 GN=CT42567 PE=1 SV=1	0.323014
>sp|Q9U6L5|PEB1_DROME Ejaculatory bulb-specific protein 1 OS=Drosophila melanogaster OX=7227 GN=Ebp PE=1 SV=1	0.0360743		>tr|Q5BIE4|Q5BIE4_DROME RE40577p OS=Drosophila melanogaster OX=7227 GN=CT42567 PE=1 SV=1	0.323014
>tr|Q9VVL7|Q9VVL7_DROME Dihydrolipoyl dehydrogenase OS=Drosophila melanogaster OX=7227 GN=E3 PE=1 SV=1	0.0339286		>tr|Q9VUM2|Q9VUM2_DROME RH56103p OS=Drosophila melanogaster OX=7227 GN=Dmel\CG6878 PE=1 SV=1	0.322785
>tr|Q9VVL7|Q9VVL7_DROME Dihydrolipoyl dehydrogenase OS=Drosophila melanogaster OX=7227 GN=E3 PE=1 SV=1	0.0339286		>tr|Q9Y163|Q9Y163_DROME BcDNA.GH02636 OS=Drosophila melanogaster OX=7227 GN=hoe1 PE=1 SV=1	0.321793
>tr|Q9VVL7|Q9VVL7_DROME Dihydrolipoyl dehydrogenase OS=Drosophila melanogaster OX=7227 GN=E3 PE=1 SV=1	0.0339286		>tr|Q9Y163|Q9Y163_DROME BcDNA.GH02636 OS=Drosophila melanogaster OX=7227 GN=hoe1 PE=1 SV=1	0.321793
>sp|Q05825|ATPB_DROME ATP synthase subunit beta, mitochondrial OS=Drosophila melanogaster OX=7227 GN=ATPsynbeta PE=1 SV=3	0.0336634		>tr|Q9Y163|Q9Y163_DROME BcDNA.GH02636 OS=Drosophila melanogaster OX=7227 GN=hoe1 PE=1 SV=1	0.321793
>sp|Q05825|ATPB_DROME ATP synthase subunit beta, mitochondrial OS=Drosophila melanogaster OX=7227 GN=ATPsynbeta PE=1 SV=3	0.0336634		>tr|Q7K172|Q7K172_DROME CAAX prenyl protease OS=Drosophila melanogaster OX=7227 GN=ste24a PE=1 SV=1	0.321729
>sp|Q05825|ATPB_DROME ATP synthase subunit beta, mitochondrial OS=Drosophila melanogaster OX=7227 GN=ATPsynbeta PE=1 SV=3	0.0336634		>tr|Q7K172|Q7K172_DROME CAAX prenyl protease OS=Drosophila melanogaster OX=7227 GN=ste24a PE=1 SV=1	0.321729
>tr|Q9VCK6|Q9VCK6_DROME LD34157p OS=Drosophila melanogaster OX=7227 GN=Dmel\CG10184 PE=1 SV=1	0.0315927		>tr|Q7K172|Q7K172_DROME CAAX prenyl protease OS=Drosophila melanogaster OX=7227 GN=ste24a PE=1 SV=1	0.321729
>tr|Q9VCK6|Q9VCK6_DROME LD34157p OS=Drosophila melanogaster OX=7227 GN=Dmel\CG10184 PE=1 SV=1	0.0315927		>sp|Q9VWK6|PGP2L_DROME Post-GPI attachment to proteins factor 2-like OS=Drosophila melanogaster OX=7227 GN=CG7990 PE=2 SV=4	0.32
>tr|Q9VCK6|Q9VCK6_DROME LD34157p OS=Drosophila melanogaster OX=7227 GN=Dmel\CG10184 PE=1 SV=1	0.0315927		>tr|Q9U1L2|Q9U1L2_DROME EG:BACR7A4.14 protein OS=Drosophila melanogaster OX=7227 GN=EG:BACR7A4.14 PE=1 SV=1	0.315538
>tr|Q8IPP8|Q8IPP8_DROME Uncharacterized protein OS=Drosophila melanogaster OX=7227 GN=Dmel\CG31548 PE=1 SV=1	0.0308594		>tr|Q9U1L2|Q9U1L2_DROME EG:BACR7A4.14 protein OS=Drosophila melanogaster OX=7227 GN=EG:BACR7A4.14 PE=1 SV=1	0.315538
>tr|Q8IPP8|Q8IPP8_DROME Uncharacterized protein OS=Drosophila melanogaster OX=7227 GN=Dmel\CG31548 PE=1 SV=1	0.0308594		>tr|Q9U1L2|Q9U1L2_DROME EG:BACR7A4.14 protein OS=Drosophila melanogaster OX=7227 GN=EG:BACR7A4.14 PE=1 SV=1	0.315538
>tr|Q8IPP8|Q8IPP8_DROME Uncharacterized protein OS=Drosophila melanogaster OX=7227 GN=Dmel\CG31548 PE=1 SV=1	0.0308594		>sp|P91657|OPS5_DROME Opsin Rh5 OS=Drosophila melanogaster OX=7227 GN=Rh5 PE=2 SV=1	0.312304
>tr|Q960M4|Q960M4_DROME Peroxiredoxin OS=Drosophila melanogaster OX=7227 GN=Prx5 PE=1 SV=1	0.0305263		>tr|Q9VRM3|Q9VRM3_DROME Sinuous OS=Drosophila melanogaster OX=7227 GN=sinu PE=1 SV=3	0.308502
>tr|Q960M4|Q960M4_DROME Peroxiredoxin OS=Drosophila melanogaster OX=7227 GN=Prx5 PE=1 SV=1	0.0305263		>tr|Q9VRM3|Q9VRM3_DROME Sinuous OS=Drosophila melanogaster OX=7227 GN=sinu PE=1 SV=3	0.308502
>tr|Q960M4|Q960M4_DROME Peroxiredoxin OS=Drosophila melanogaster OX=7227 GN=Prx5 PE=1 SV=1	0.0305263		>tr|Q9VRM3|Q9VRM3_DROME Sinuous OS=Drosophila melanogaster OX=7227 GN=sinu PE=1 SV=3	0.308502
>sp|P07486|G3P1_DROME Glyceraldehyde-3-phosphate dehydrogenase 1 OS=Drosophila melanogaster OX=7227 GN=Gapdh1 PE=2 SV=2	0.0304217		>tr|Q7JWM4|Q7JWM4_DROME RE32413p OS=Drosophila melanogaster OX=7227 GN=Dmel\CG13217 PE=2 SV=1	0.30531
>sp|P07486|G3P1_DROME Glyceraldehyde-3-phosphate dehydrogenase 1 OS=Drosophila melanogaster OX=7227 GN=Gapdh1 PE=2 SV=2	0.0304217		>tr|Q7JWM4|Q7JWM4_DROME RE32413p OS=Drosophila melanogaster OX=7227 GN=Dmel\CG13217 PE=2 SV=1	0.30531
>sp|P07486|G3P1_DROME Glyceraldehyde-3-phosphate dehydrogenase 1 OS=Drosophila melanogaster OX=7227 GN=Gapdh1 PE=2 SV=2	0.0304217		>tr|Q9V3N6|Q9V3N6_DROME Transmembrane 9 superfamily member OS=Drosophila melanogaster OX=7227 GN=TM9SF4 PE=1 SV=1	0.300159
>sp|O46202|A62F_DROME Accessory gland protein Acp62F OS=Drosophila melanogaster OX=7227 GN=Acp62F PE=2 SV=1	0.0295652		>tr|Q9VZG2|Q9VZG2_DROME Cuticular protein 64Aa OS=Drosophila melanogaster OX=7227 GN=Cpr64Aa PE=2 SV=1	0.293229
>tr|Q9VUW2|Q9VUW2_DROME Inositol-1-monophosphatase OS=Drosophila melanogaster OX=7227 GN=IMP PE=1 SV=1	0.028169		>tr|Q9VZG2|Q9VZG2_DROME Cuticular protein 64Aa OS=Drosophila melanogaster OX=7227 GN=Cpr64Aa PE=2 SV=1	0.293229
>tr|Q9VUW2|Q9VUW2_DROME Inositol-1-monophosphatase OS=Drosophila melanogaster OX=7227 GN=IMP PE=1 SV=1	0.028169		>tr|Q9W0B2|Q9W0B2_DROME LD19311p OS=Drosophila melanogaster OX=7227 GN=anon-WO0118547.268 PE=1 SV=1	0.290576
>tr|Q9VUE4|Q9VUE4_DROME Uncharacterized protein OS=Drosophila melanogaster OX=7227 GN=Dmel\CG3868 PE=4 SV=1	0.0252149		>tr|Q9VMW1|Q9VMW1_DROME Reticulon-like protein OS=Drosophila melanogaster OX=7227 GN=Rtnl1 PE=1 SV=2	0.288393
>tr|Q9VU38|Q9VU38_DROME Adenosine kinase, isoform B OS=Drosophila melanogaster OX=7227 GN=AdenoK PE=1 SV=1	0.024058		>tr|Q9VMW1|Q9VMW1_DROME Reticulon-like protein OS=Drosophila melanogaster OX=7227 GN=Rtnl1 PE=1 SV=2	0.288393
>tr|Q9VU38|Q9VU38_DROME Adenosine kinase, isoform B OS=Drosophila melanogaster OX=7227 GN=AdenoK PE=1 SV=1	0.024058		>tr|Q9VCS2|Q9VCS2_DROME IP10670p OS=Drosophila melanogaster OX=7227 GN=Dmel\CG13833 PE=2 SV=1	0.28567
>tr|X2J516|X2J516_DROME Trifunctional purine biosynthetic protein adenosine-3 OS=Drosophila melanogaster OX=7227 GN=Gart PE=1 SV=1	0.0203252		>tr|Q9VRE0|Q9VRE0_DROME Catalytic subunit 3A of the oligosaccharyltransferase complex, isoform A OS=Drosophila melanogaster OX=7227 GN=Stt3A PE=1 SV=1	0.285273
>tr|X2J516|X2J516_DROME Trifunctional purine biosynthetic protein adenosine-3 OS=Drosophila melanogaster OX=7227 GN=Gart PE=1 SV=1	0.0203252		>tr|Q9VRE0|Q9VRE0_DROME Catalytic subunit 3A of the oligosaccharyltransferase complex, isoform A OS=Drosophila melanogaster OX=7227 GN=Stt3A PE=1 SV=1	0.285273
>tr|X2J516|X2J516_DROME Trifunctional purine biosynthetic protein adenosine-3 OS=Drosophila melanogaster OX=7227 GN=Gart PE=1 SV=1	0.0203252		>sp|Q9VCG4|NDC1_DROME Nucleoporin Ndc1 OS=Drosophila melanogaster OX=7227 GN=Ndc1 PE=1 SV=1	0.285121
>tr|Q9VKW3|Q9VKW3_DROME Replication factor C subunit 3 OS=Drosophila melanogaster OX=7227 GN=RfC3 PE=1 SV=2	0.0195783		>sp|P84345|ATP8_DROME ATP synthase protein 8 OS=Drosophila melanogaster OX=7227 GN=mt:ATPase8 PE=3 SV=1	0.281132
>sp|P07487|G3P2_DROME Glyceraldehyde-3-phosphate dehydrogenase 2 OS=Drosophila melanogaster OX=7227 GN=Gapdh2 PE=1 SV=2	0.0177711		>sp|P35004|TRYB_DROME Trypsin beta OS=Drosophila melanogaster OX=7227 GN=betaTry PE=2 SV=2	0.272727
>sp|P07487|G3P2_DROME Glyceraldehyde-3-phosphate dehydrogenase 2 OS=Drosophila melanogaster OX=7227 GN=Gapdh2 PE=1 SV=2	0.0177711		>tr|Q9VX29|Q9VX29_DROME RE33814p OS=Drosophila melanogaster OX=7227 GN=Dmel\CG12990 PE=2 SV=2	0.268024
>sp|P07487|G3P2_DROME Glyceraldehyde-3-phosphate dehydrogenase 2 OS=Drosophila melanogaster OX=7227 GN=Gapdh2 PE=1 SV=2	0.0177711		>tr|Q9VX29|Q9VX29_DROME RE33814p OS=Drosophila melanogaster OX=7227 GN=Dmel\CG12990 PE=2 SV=2	0.268024
>sp|Q9V9X4|MTNA_DROME Methylthioribose-1-phosphate isomerase OS=Drosophila melanogaster OX=7227 GN=CG11334 PE=2 SV=1	0.0164835		>tr|Q9VQT8|Q9VQT8_DROME Immune induced molecule 33, isoform A OS=Drosophila melanogaster OX=7227 GN=IM33 PE=1 SV=1	0.265854
>sp|P24156|L2CC_DROME Protein l(2)37Cc OS=Drosophila melanogaster OX=7227 GN=l(2)37Cc PE=2 SV=2	0.0112319		>tr|Q9VQT8|Q9VQT8_DROME Immune induced molecule 33, isoform A OS=Drosophila melanogaster OX=7227 GN=IM33 PE=1 SV=1	0.265854
>sp|O18388|IMB_DROME Importin subunit beta OS=Drosophila melanogaster OX=7227 GN=Fs(2)Ket PE=1 SV=2	0.0106335		>tr|Q9VQT8|Q9VQT8_DROME Immune induced molecule 33, isoform A OS=Drosophila melanogaster OX=7227 GN=IM33 PE=1 SV=1	0.265854
>sp|O18388|IMB_DROME Importin subunit beta OS=Drosophila melanogaster OX=7227 GN=Fs(2)Ket PE=1 SV=2	0.0106335		>tr|A8JNT1|A8JNT1_DROME Uncharacterized protein, isoform B OS=Drosophila melanogaster OX=7227 GN=Dmel\CG12355 PE=3 SV=1	0.264216
>tr|Q9W0H6|Q9W0H6_DROME Uncharacterized protein OS=Drosophila melanogaster OX=7227 GN=Dmel\CG9149 PE=1 SV=2	0.00688776		>tr|A8JNT1|A8JNT1_DROME Uncharacterized protein, isoform B OS=Drosophila melanogaster OX=7227 GN=Dmel\CG12355 PE=3 SV=1	0.264216
>tr|Q9W0H6|Q9W0H6_DROME Uncharacterized protein OS=Drosophila melanogaster OX=7227 GN=Dmel\CG9149 PE=1 SV=2	0.00688776		>tr|A8JNT1|A8JNT1_DROME Uncharacterized protein, isoform B OS=Drosophila melanogaster OX=7227 GN=Dmel\CG12355 PE=3 SV=1	0.264216
>tr|Q9W0H6|Q9W0H6_DROME Uncharacterized protein OS=Drosophila melanogaster OX=7227 GN=Dmel\CG9149 PE=1 SV=2	0.00688776		>sp|P56079|CDSA_DROME Phosphatidate cytidylyltransferase, photoreceptor-specific OS=Drosophila melanogaster OX=7227 GN=CdsA PE=1 SV=2	0.26085
>sp|Q94522|SUCA_DROME Succinate--CoA ligase [ADP/GDP-forming] subunit alpha, mitochondrial OS=Drosophila melanogaster OX=7227 GN=Scsalpha1 PE=2 SV=3	0.00609756		>sp|P56079|CDS_DROME Phosphatidate cytidylyltransferase, photoreceptor-specific OS=Drosophila melanogaster OX=7227 GN=Cds PE=1 SV=2	0.26085
>sp|Q94522|SUCA_DROME Succinate--CoA ligase [ADP/GDP-forming] subunit alpha, mitochondrial OS=Drosophila melanogaster OX=7227 GN=Scsalpha1 PE=2 SV=3	0.00609756		>sp|P56079|CDS_DROME Phosphatidate cytidylyltransferase, photoreceptor-specific OS=Drosophila melanogaster OX=7227 GN=Cds PE=1 SV=2	0.26085
>sp|Q94522|SUCA_DROME Succinate--CoA ligase [ADP/GDP-forming] subunit alpha, mitochondrial OS=Drosophila melanogaster OX=7227 GN=Scsalpha1 PE=2 SV=3	0.00609756		>tr|Q8SY53|Q8SY53_DROME GH11935p OS=Drosophila melanogaster OX=7227 GN=Ostgamma PE=1 SV=1	0.258182
>tr|X2J986|X2J986_DROME Fat body protein 2, isoform B OS=Drosophila melanogaster OX=7227 GN=Fbp2 PE=3 SV=1	0.00585937		>tr|Q8SY53|Q8SY53_DROME GH11935p OS=Drosophila melanogaster OX=7227 GN=Ostgamma PE=1 SV=1	0.258182
>tr|X2J986|X2J986_DROME Fat body protein 2, isoform B OS=Drosophila melanogaster OX=7227 GN=Fbp2 PE=3 SV=1	0.00585937		>tr|Q8SY53|Q8SY53_DROME GH11935p OS=Drosophila melanogaster OX=7227 GN=Ostgamma PE=1 SV=1	0.258182
>tr|X2J986|X2J986_DROME Fat body protein 2, isoform B OS=Drosophila melanogaster OX=7227 GN=Fbp2 PE=3 SV=1	0.00585937		>tr|Q9VF46|Q9VF46_DROME GH25158p OS=Drosophila melanogaster OX=7227 GN=Dmel\CG5399 PE=2 SV=1	0.256422
>tr|A1Z934|A1Z934_DROME SD19268p OS=Drosophila melanogaster OX=7227 GN=Dmel\CG8778 PE=1 SV=1	0.00468227		>tr|Q6NP72|Q6NP72_DROME GEO09659p1 OS=Drosophila melanogaster OX=7227 GN=Dmel\CG13220 PE=1 SV=1	0.248366
>tr|A0A0B4JCW4|A0A0B4JCW4_DROME Succinate--CoA ligase [ADP-forming] subunit beta, mitochondrial OS=Drosophila melanogaster OX=7227 GN=ScsbetaA PE=1 SV=1	0.0037694		>tr|Q6NP72|Q6NP72_DROME GEO09659p1 OS=Drosophila melanogaster OX=7227 GN=Dmel\CG13220 PE=1 SV=1	0.248366
>tr|A0A0B4JCW4|A0A0B4JCW4_DROME Succinate--CoA ligase [ADP-forming] subunit beta, mitochondrial OS=Drosophila melanogaster OX=7227 GN=ScsbetaA PE=1 SV=1	0.0037694		>sp|Q9VMV6|SELT_DROME Thioredoxin reductase-like selenoprotein T homolog CG3887 OS=Drosophila melanogaster OX=7227 GN=SelT PE=2 SV=1	0.247475
>tr|A0A0B4JCW4|A0A0B4JCW4_DROME Succinate--CoA ligase [ADP-forming] subunit beta, mitochondrial OS=Drosophila melanogaster OX=7227 GN=ScsbetaA PE=1 SV=1	0.0037694		>sp|Q9VMV6|SELT_DROME Thioredoxin reductase-like selenoprotein T homolog CG3887 OS=Drosophila melanogaster OX=7227 GN=SelT PE=2 SV=1	0.247475
>tr|Q9VX69|Q9VX69_DROME FI01450p OS=Drosophila melanogaster OX=7227 GN=Dmel\CG5162 PE=1 SV=1	0.00291971		>sp|Q9VMV6|SELT_DROME Thioredoxin reductase-like selenoprotein T homolog CG3887 OS=Drosophila melanogaster OX=7227 GN=SelT PE=2 SV=1	0.247475
>tr|Q9VX69|Q9VX69_DROME FI01450p OS=Drosophila melanogaster OX=7227 GN=Dmel\CG5162 PE=1 SV=1	0.00291971		>tr|A1Z9M2|A1Z9M2_DROME Receptor expression-enhancing protein OS=Drosophila melanogaster OX=7227 GN=ReepB PE=3 SV=1	0.247191
>tr|Q9VX69|Q9VX69_DROME FI01450p OS=Drosophila melanogaster OX=7227 GN=Dmel\CG5162 PE=1 SV=1	0.00291971		>tr|A1Z9M2|A1Z9M2_DROME Receptor expression-enhancing protein OS=Drosophila melanogaster OX=7227 GN=ReepB PE=3 SV=1	0.247191
>tr|Q961W5|Q961W5_DROME GH02452p OS=Drosophila melanogaster OX=7227 GN=S-Lap3 PE=1 SV=1	0.00224299		>tr|A1Z9M2|A1Z9M2_DROME Receptor expression-enhancing protein OS=Drosophila melanogaster OX=7227 GN=ReepB PE=3 SV=1	0.247191
>tr|Q961W5|Q961W5_DROME GH02452p OS=Drosophila melanogaster OX=7227 GN=S-Lap3 PE=1 SV=1	0.00224299		>tr|Q8IQ51|Q8IQ51_DROME IP21943p OS=Drosophila melanogaster OX=7227 GN=Dmel\CG32523 PE=2 SV=1	0.24313
>sp|P48554|RAC2_DROME Ras-related protein Rac2 OS=Drosophila melanogaster OX=7227 GN=Rac2 PE=1 SV=1	0.00208333		>sp|Q9VQ62|NPC2_DROME NPC intracellular cholesterol transporter 2 homolog a OS=Drosophila melanogaster OX=7227 GN=Npc2a PE=2 SV=1	0.237162
>tr|Q9VEK3|Q9VEK3_DROME Peptidase A1 domain-containing protein OS=Drosophila melanogaster OX=7227 GN=Dmel\CG5863 PE=3 SV=1	0.00177215		>sp|Q9VQ62|NPC2_DROME NPC intracellular cholesterol transporter 2 homolog a OS=Drosophila melanogaster OX=7227 GN=Npc2a PE=2 SV=1	0.237162
>sp|Q9VMY9|GUAD_DROME Guanine deaminase OS=Drosophila melanogaster OX=7227 GN=DhpD PE=1 SV=1	0.0015625		>tr|Q9XZ53|Q9XZ53_DROME Catalytic subunit 3B of the oligosaccharyltransferase complex OS=Drosophila melanogaster OX=7227 GN=Stt3B PE=1 SV=1	0.234755
>sp|Q9VMY9|GUAD_DROME Guanine deaminase OS=Drosophila melanogaster OX=7227 GN=DhpD PE=1 SV=1	0.0015625		>tr|Q9XZ53|Q9XZ53_DROME Catalytic subunit 3B of the oligosaccharyltransferase complex OS=Drosophila melanogaster OX=7227 GN=Stt3B PE=1 SV=1	0.234755
>sp|Q9VMY9|GUAD_DROME Guanine deaminase OS=Drosophila melanogaster OX=7227 GN=DhpD PE=1 SV=1	0.0015625		>tr|Q9XZ53|Q9XZ53_DROME Catalytic subunit 3B of the oligosaccharyltransferase complex OS=Drosophila melanogaster OX=7227 GN=Stt3B PE=1 SV=1	0.234755
>sp|Q9U3Z7|NH2L1_DROME NHP2-like protein 1 homolog OS=Drosophila melanogaster OX=7227 GN=hoip PE=2 SV=1	-0.000787402		>tr|Q9VX13|Q9VX13_DROME FI05221p OS=Drosophila melanogaster OX=7227 GN=Dmel\CG15814 PE=2 SV=1	0.234579
>sp|Q9U3Z7|NH2L1_DROME NHP2-like protein 1 homolog OS=Drosophila melanogaster OX=7227 GN=hoip PE=2 SV=1	-0.000787402		>tr|Q9VRN1|Q9VRN1_DROME Transmembrane 9 superfamily member OS=Drosophila melanogaster OX=7227 GN=TM9SF3 PE=1 SV=2	0.23125
>sp|Q9U3Z7|NH2L1_DROME NHP2-like protein 1 homolog OS=Drosophila melanogaster OX=7227 GN=hoip PE=2 SV=1	-0.000787402		>tr|Q9VRN1|Q9VRN1_DROME Transmembrane 9 superfamily member OS=Drosophila melanogaster OX=7227 GN=TM9SF3 PE=1 SV=2	0.23125
>tr|Q8MLS2|Q8MLS2_DROME Ribose-5-phosphate isomerase, isoform B OS=Drosophila melanogaster OX=7227 GN=Rpi PE=1 SV=3	-0.00124481		>sp|Q9VBN7|SAMC_DROME S-adenosylmethionine mitochondrial carrier protein homolog OS=Drosophila melanogaster OX=7227 GN=CG4743 PE=2 SV=2	0.230742
>tr|Q8MLS2|Q8MLS2_DROME Ribose-5-phosphate isomerase, isoform B OS=Drosophila melanogaster OX=7227 GN=Rpi PE=1 SV=3	-0.00124481		>tr|Q6IJR5|Q6IJR5_DROME HDC14388 OS=Drosophila melanogaster OX=7227 GN=Dmel\CG34284 PE=4 SV=1	0.229032
>tr|Q8MLS2|Q8MLS2_DROME Ribose-5-phosphate isomerase, isoform B OS=Drosophila melanogaster OX=7227 GN=Rpi PE=1 SV=3	-0.00124481		>tr|Q9W1J0|Q9W1J0_DROME Transporter OS=Drosophila melanogaster OX=7227 GN=GlyT PE=3 SV=2	0.228367
>tr|Q8IQN8|Q8IQN8_DROME Photoreceptor dehydrogenase, isoform B OS=Drosophila melanogaster OX=7227 GN=Pdh PE=1 SV=1	-0.00180505		>tr|Q9W1J0|Q9W1J0_DROME Transporter OS=Drosophila melanogaster OX=7227 GN=GlyT PE=3 SV=2	0.228367
>tr|Q6NNV7|Q6NNV7_DROME RH03309p OS=Drosophila melanogaster OX=7227 GN=FOHSDR PE=1 SV=1	-0.00809717		>tr|A1Z9M6|A1Z9M6_DROME Vesicular GABA transporter OS=Drosophila melanogaster OX=7227 GN=VGAT PE=4 SV=1	0.226594
>tr|D0Z756|D0Z756_DROME MIP14966p OS=Drosophila melanogaster OX=7227 GN=CG14762-RA PE=1 SV=1	-0.00943775		>tr|Q9VD30|Q9VD30_DROME GH05294p OS=Drosophila melanogaster OX=7227 GN=rdhB PE=1 SV=1	0.224597
>tr|D0Z756|D0Z756_DROME MIP14966p OS=Drosophila melanogaster OX=7227 GN=CG14762-RA PE=1 SV=1	-0.00943775		>tr|Q9VD30|Q9VD30_DROME GH05294p OS=Drosophila melanogaster OX=7227 GN=rdhB PE=1 SV=1	0.224597
>tr|A0A0B4K623|A0A0B4K623_DROME Pugilist, isoform E OS=Drosophila melanogaster OX=7227 GN=pug PE=1 SV=1	-0.0126425		>tr|Q9VD30|Q9VD30_DROME GH05294p OS=Drosophila melanogaster OX=7227 GN=rdhB PE=1 SV=1	0.224597
>tr|A0A0B4K623|A0A0B4K623_DROME Pugilist, isoform E OS=Drosophila melanogaster OX=7227 GN=pug PE=1 SV=1	-0.0126425		>tr|O76137|O76137_DROME Tetraspanin OS=Drosophila melanogaster OX=7227 GN=TM4SF PE=2 SV=1	0.222028
>tr|A0A0B4K623|A0A0B4K623_DROME Pugilist, isoform E OS=Drosophila melanogaster OX=7227 GN=pug PE=1 SV=1	-0.0126425		>tr|O76137|O76137_DROME Tetraspanin OS=Drosophila melanogaster OX=7227 GN=TM4SF PE=2 SV=1	0.222028
>tr|Q9W2X6|Q9W2X6_DROME ATP synthase, delta subunit, isoform A OS=Drosophila melanogaster OX=7227 GN=ATPsyndelta PE=1 SV=1	-0.0127389		>sp|P04950|OPS3_DROME Opsin Rh3 OS=Drosophila melanogaster OX=7227 GN=Rh3 PE=1 SV=1	0.22141
>tr|Q7K485|Q7K485_DROME CathD, isoform A OS=Drosophila melanogaster OX=7227 GN=cathD PE=1 SV=1	-0.0142857		>sp|P04950|OPS3_DROME Opsin Rh3 OS=Drosophila melanogaster OX=7227 GN=Rh3 PE=1 SV=1	0.22141
>tr|Q7K485|Q7K485_DROME CathD, isoform A OS=Drosophila melanogaster OX=7227 GN=cathD PE=1 SV=1	-0.0142857		>tr|Q9VCR9|Q9VCR9_DROME RH48101p OS=Drosophila melanogaster OX=7227 GN=Dmel\CG17121 PE=1 SV=1	0.22133
>tr|Q9Y171|Q9Y171_DROME BcDNA.GH02220 OS=Drosophila melanogaster OX=7227 GN=OXA1L PE=2 SV=1	-0.0154195		>tr|Q9VCR9|Q9VCR9_DROME RH48101p OS=Drosophila melanogaster OX=7227 GN=Dmel\CG17121 PE=1 SV=1	0.22133
>tr|Q9VV47|Q9VV47_DROME GH15220p OS=Drosophila melanogaster OX=7227 GN=Dmel\CG4842 PE=1 SV=2	-0.0162162		>tr|Q9VCR9|Q9VCR9_DROME RH48101p OS=Drosophila melanogaster OX=7227 GN=Dmel\CG17121 PE=1 SV=1	0.22133
>tr|Q9W077|Q9W077_DROME Cuticular protein 62Bc, isoform A OS=Drosophila melanogaster OX=7227 GN=Cpr62Bc PE=1 SV=1	-0.0177778		>tr|E2QCM9|E2QCM9_DROME Diuretic hormone 44 receptor 2, isoform B OS=Drosophila melanogaster OX=7227 GN=Dh44-R2 PE=3 SV=1	0.217857
>tr|Q9W077|Q9W077_DROME Cuticular protein 62Bc, isoform A OS=Drosophila melanogaster OX=7227 GN=Cpr62Bc PE=1 SV=1	-0.0177778		>sp|Q9VAF0|S39AD_DROME Zinc transporter ZIP13 homolog OS=Drosophila melanogaster OX=7227 GN=Zip99C PE=2 SV=1	0.217183
>tr|Q9VA41|Q9VA41_DROME GEO08227p1 OS=Drosophila melanogaster OX=7227 GN=Npc2h PE=1 SV=1	-0.0178344		>tr|Q7KN94|Q7KN94_DROME Walrus, isoform A OS=Drosophila melanogaster OX=7227 GN=wal PE=1 SV=1	0.216667
>tr|Q7K8X7|Q7K8X7_DROME Glutathione S transferase E9 OS=Drosophila melanogaster OX=7227 GN=GstE9 PE=1 SV=1	-0.0180995		>tr|Q7KN94|Q7KN94_DROME Electron transfer flavoprotein subunit alpha OS=Drosophila melanogaster OX=7227 GN=wal PE=1 SV=1	0.216667
>tr|Q7K8X7|Q7K8X7_DROME Glutathione S transferase E9 OS=Drosophila melanogaster OX=7227 GN=GstE9 PE=1 SV=1	-0.0180995		>tr|Q7KN94|Q7KN94_DROME Electron transfer flavoprotein subunit alpha OS=Drosophila melanogaster OX=7227 GN=wal PE=1 SV=1	0.216667
>tr|Q7K8X7|Q7K8X7_DROME Glutathione S transferase E9 OS=Drosophila melanogaster OX=7227 GN=GstE9 PE=1 SV=1	-0.0180995		>sp|Q27333|NT56_DROME Lethal(2)neighbour of tid protein OS=Drosophila melanogaster OX=7227 GN=l(2)not PE=1 SV=1	0.212745
>tr|Q8IPU0|Q8IPU0_DROME Uncharacterized protein, isoform B OS=Drosophila melanogaster OX=7227 GN=Dmel\CG10512 PE=1 SV=1	-0.0186352		>sp|Q27333|NT56_DROME Lethal(2)neighbour of tid protein OS=Drosophila melanogaster OX=7227 GN=l(2)not PE=1 SV=1	0.212745
>tr|Q8IPU0|Q8IPU0_DROME Uncharacterized protein, isoform B OS=Drosophila melanogaster OX=7227 GN=Dmel\CG10512 PE=1 SV=1	-0.0186352		>sp|Q27333|NT56_DROME Lethal(2)neighbour of tid protein OS=Drosophila melanogaster OX=7227 GN=l(2)not PE=1 SV=1	0.212745
>tr|C0PDF4|C0PDF4_DROME MIP06482p OS=Drosophila melanogaster OX=7227 GN=CG18815-RA PE=1 SV=1	-0.0235294		>sp|Q9GQQ0|SPIN_DROME Protein spinster OS=Drosophila melanogaster OX=7227 GN=spin PE=1 SV=1	0.211736
>tr|C0PDF4|C0PDF4_DROME MIP06482p OS=Drosophila melanogaster OX=7227 GN=CG18815-RA PE=1 SV=1	-0.0235294		>sp|Q9GQQ0|SPIN_DROME Protein spinster OS=Drosophila melanogaster OX=7227 GN=spin PE=1 SV=1	0.211736
>tr|C0PDF4|C0PDF4_DROME MIP06482p OS=Drosophila melanogaster OX=7227 GN=CG18815-RA PE=1 SV=1	-0.0235294		>sp|Q9GQQ0|SPIN_DROME Protein spinster OS=Drosophila melanogaster OX=7227 GN=spin PE=1 SV=1	0.211736
>tr|Q494I1|Q494I1_DROME GH08786p OS=Drosophila melanogaster OX=7227 GN=Dmel\CG2747 PE=1 SV=1	-0.023584		>tr|Q8IRD0|Q8IRD0_DROME RH17559p OS=Drosophila melanogaster OX=7227 GN=Dmel\CG32267 PE=1 SV=1	0.210204
>tr|Q9VYU9|Q9VYU9_DROME RH17287p OS=Drosophila melanogaster OX=7227 GN=Dmel\CG9360 PE=1 SV=1	-0.0258964		>tr|Q8IRD0|Q8IRD0_DROME RH17559p OS=Drosophila melanogaster OX=7227 GN=Dmel\CG32267 PE=1 SV=1	0.210204
>tr|Q9VYU9|Q9VYU9_DROME RH17287p OS=Drosophila melanogaster OX=7227 GN=Dmel\CG9360 PE=1 SV=1	-0.0258964		>tr|Q8SY69|Q8SY69_DROME MICOS complex subunit MIC10 OS=Drosophila melanogaster OX=7227 GN=RH61753p PE=2 SV=1	0.208333
>sp|Q9VXJ0|DHB4_DROME Peroxisomal multifunctional enzyme type 2 OS=Drosophila melanogaster OX=7227 GN=Mfe2 PE=1 SV=1	-0.026087		>sp|Q8IQC1|TVP23_DROME Uncharacterized Golgi apparatus membrane protein-like protein CG5021 OS=Drosophila melanogaster OX=7227 GN=CG5021 PE=2 SV=2	0.202242
>sp|Q9VXJ0|DHB4_DROME Peroxisomal multifunctional enzyme type 2 OS=Drosophila melanogaster OX=7227 GN=Mfe2 PE=1 SV=1	-0.026087		>sp|Q8IQC1|TVP23_DROME Uncharacterized Golgi apparatus membrane protein-like protein CG5021 OS=Drosophila melanogaster OX=7227 GN=CG5021 PE=2 SV=2	0.202242
>tr|Q9V470|Q9V470_DROME Succinate--CoA ligase [GDP-forming] subunit beta, mitochondrial OS=Drosophila melanogaster OX=7227 GN=ScsbetaG PE=1 SV=1	-0.0266827		>tr|Q9W4P0|Q9W4P0_DROME LD22456p OS=Drosophila melanogaster OX=7227 GN=Dmel\CG2938 PE=2 SV=1	0.20174
>tr|Q9V470|Q9V470_DROME Succinate--CoA ligase [GDP-forming] subunit beta, mitochondrial OS=Drosophila melanogaster OX=7227 GN=ScsbetaG PE=1 SV=1	-0.0266827		>sp|P12426|APT_DROME Adenine phosphoribosyltransferase OS=Drosophila melanogaster OX=7227 GN=Aprt PE=2 SV=3	0.2
>tr|Q7K2V9|Q7K2V9_DROME Mevalonate kinase OS=Drosophila melanogaster OX=7227 GN=CG16804 PE=2 SV=1	-0.0269231		>sp|Q9V7S5|PICO_DROME Putative inorganic phosphate cotransporter OS=Drosophila melanogaster OX=7227 GN=Picot PE=2 SV=1	0.197543
>tr|Q7K2V9|Q7K2V9_DROME Mevalonate kinase OS=Drosophila melanogaster OX=7227 GN=CG16804 PE=2 SV=1	-0.0269231		>tr|O76899|O76899_DROME EG:80H7.2 protein OS=Drosophila melanogaster OX=7227 GN=pck PE=4 SV=1	0.193359
>sp|Q9NFT7|HXK2_DROME Hexokinase type 2 OS=Drosophila melanogaster OX=7227 GN=Hex-t2 PE=2 SV=4	-0.027572		>tr|O76899|O76899_DROME EG:80H7.2 protein OS=Drosophila melanogaster OX=7227 GN=pck PE=4 SV=1	0.193359
>tr|Q500X4|Q500X4_DROME AT20029p OS=Drosophila melanogaster OX=7227 GN=S-Lap7 PE=1 SV=1	-0.0280835		>tr|Q86P18|Q86P18_DROME RE14039p OS=Drosophila melanogaster OX=7227 GN=CG6166 PE=2 SV=1	0.190991
>tr|Q500X4|Q500X4_DROME AT20029p OS=Drosophila melanogaster OX=7227 GN=S-Lap7 PE=1 SV=1	-0.0280835		>tr|Q86P18|Q86P18_DROME RE14039p OS=Drosophila melanogaster OX=7227 GN=CG6166 PE=2 SV=1	0.190991
>sp|Q0E8C8|SP77B_DROME Serine protease inhibitor 77Ba OS=Drosophila melanogaster OX=7227 GN=Spn77Ba PE=2 SV=1	-0.0284444		>tr|Q9W441|Q9W441_DROME Tetraspanin OS=Drosophila melanogaster OX=7227 GN=Tsp5D PE=2 SV=4	0.190813
>sp|Q0E8C8|SP77B_DROME Serine protease inhibitor 77Ba OS=Drosophila melanogaster OX=7227 GN=Spn77Ba PE=2 SV=1	-0.0284444		>tr|Q9W441|Q9W441_DROME Tetraspanin OS=Drosophila melanogaster OX=7227 GN=Tsp5D PE=2 SV=4	0.190813
>tr|Q24253|Q24253_DROME AP complex subunit beta OS=Drosophila melanogaster OX=7227 GN=AP-1-2beta PE=1 SV=1	-0.0295331		>tr|Q9W441|Q9W441_DROME Tetraspanin OS=Drosophila melanogaster OX=7227 GN=Tsp5D PE=2 SV=4	0.190813
>tr|Q24253|Q24253_DROME AP complex subunit beta OS=Drosophila melanogaster OX=7227 GN=AP-1-2beta PE=1 SV=1	-0.0295331		>sp|Q9V447|KRH2_DROME Krueppel homolog 2 OS=Drosophila melanogaster OX=7227 GN=Kr-h2 PE=1 SV=1	0.18913
>sp|Q9W0C7|OPI10_DROME Protein OPI10 homolog OS=Drosophila melanogaster OX=7227 GN=CG13926 PE=3 SV=1	-0.0314721		>sp|Q9V447|KRH2_DROME Krueppel homolog 2 OS=Drosophila melanogaster OX=7227 GN=Kr-h2 PE=1 SV=1	0.18913
>tr|A0A0B4KGG9|A0A0B4KGG9_DROME C-terminal binding protein, isoform F OS=Drosophila melanogaster OX=7227 GN=CtBP PE=1 SV=1	-0.0318538		>sp|Q9V447|KRH2_DROME Krueppel homolog 2 OS=Drosophila melanogaster OX=7227 GN=Kr-h2 PE=1 SV=1	0.18913
>tr|A0A0B4KGG9|A0A0B4KGG9_DROME C-terminal binding protein, isoform F OS=Drosophila melanogaster OX=7227 GN=CtBP PE=1 SV=1	-0.0318538		>sp|Q9VV36|RETIN_DROME Retinin OS=Drosophila melanogaster OX=7227 GN=retinin PE=1 SV=2	0.187435
>tr|A0A0B4KGG9|A0A0B4KGG9_DROME C-terminal binding protein, isoform F OS=Drosophila melanogaster OX=7227 GN=CtBP PE=1 SV=1	-0.0318538		>sp|Q9VV36|RETIN_DROME Retinin OS=Drosophila melanogaster OX=7227 GN=retinin PE=1 SV=2	0.187435
>tr|Q9VIC9|Q9VIC9_DROME 10-formyltetrahydrofolate dehydrogenase OS=Drosophila melanogaster OX=7227 GN=Dmel\CG8665 PE=1 SV=3	-0.0319825		>sp|Q9VV36|RETIN_DROME Retinin OS=Drosophila melanogaster OX=7227 GN=retinin PE=1 SV=2	0.187435
>sp|Q9XZU1|XPO2_DROME Exportin-2 OS=Drosophila melanogaster OX=7227 GN=Cse1 PE=2 SV=2	-0.0322051		>tr|Q9VVM2|Q9VVM2_DROME LP12049p OS=Drosophila melanogaster OX=7227 GN=Dmel\CG5506 PE=1 SV=1	0.185556
>sp|Q9W1G0|TALDO_DROME Probable transaldolase OS=Drosophila melanogaster OX=7227 GN=Taldo PE=2 SV=2	-0.034139		>tr|Q9VVM2|Q9VVM2_DROME LP12049p OS=Drosophila melanogaster OX=7227 GN=Dmel\CG5506 PE=1 SV=1	0.185556
>sp|Q9W1G0|TALDO_DROME Probable transaldolase OS=Drosophila melanogaster OX=7227 GN=Taldo PE=2 SV=2	-0.034139		>sp|Q9VA37|DJ1B_DROME Protein dj-1beta OS=Drosophila melanogaster OX=7227 GN=dj-1beta PE=1 SV=3	0.182888
>sp|Q9W1G0|TALDO_DROME Probable transaldolase OS=Drosophila melanogaster OX=7227 GN=Taldo PE=2 SV=2	-0.034139		>sp|Q9VA37|DJ1B_DROME Protein dj-1beta OS=Drosophila melanogaster OX=7227 GN=dj-1beta PE=1 SV=3	0.182888
>tr|Q9VC18|Q9VC18_DROME RE29555p OS=Drosophila melanogaster OX=7227 GN=BEST:GH11240 PE=1 SV=1	-0.0345763		>sp|Q9VA37|DJ1B_DROME Protein dj-1beta OS=Drosophila melanogaster OX=7227 GN=dj-1beta PE=1 SV=3	0.182888
>tr|Q9VC18|Q9VC18_DROME RE29555p OS=Drosophila melanogaster OX=7227 GN=BEST:GH11240 PE=1 SV=1	-0.0345763		>tr|Q9VNF3|Q9VNF3_DROME RE01652p OS=Drosophila melanogaster OX=7227 GN=Dmel\CG12171 PE=1 SV=1	0.181712
>tr|Q9VC18|Q9VC18_DROME RE29555p OS=Drosophila melanogaster OX=7227 GN=BEST:GH11240 PE=1 SV=1	-0.0345763		>tr|Q9VNF3|Q9VNF3_DROME RE01652p OS=Drosophila melanogaster OX=7227 GN=Dmel\CG12171 PE=1 SV=1	0.181712
>tr|Q7K3B7|Q7K3B7_DROME 2-hydroxyacyl-CoA lyase OS=Drosophila melanogaster OX=7227 GN=Hacl PE=1 SV=1	-0.0348592		>tr|Q9VNF3|Q9VNF3_DROME RE01652p OS=Drosophila melanogaster OX=7227 GN=Dmel\CG12171 PE=1 SV=1	0.181712
>tr|Q9VD58|Q9VD58_DROME GH26270p OS=Drosophila melanogaster OX=7227 GN=Idh3b PE=1 SV=1	-0.0351351		>tr|Q8SX57|Q8SX57_DROME LD44221p OS=Drosophila melanogaster OX=7227 GN=CG11005 PE=1 SV=1	0.181712
>tr|Q9VD58|Q9VD58_DROME GH26270p OS=Drosophila melanogaster OX=7227 GN=Idh3b PE=1 SV=1	-0.0351351		>tr|O97066|O97066_DROME Signal peptidase complex catalytic subunit SEC11 OS=Drosophila melanogaster OX=7227 GN=twr PE=1 SV=1	0.181081
>tr|Q9VD58|Q9VD58_DROME GH26270p OS=Drosophila melanogaster OX=7227 GN=Idh3b PE=1 SV=1	-0.0351351		>tr|O97066|O97066_DROME Signal peptidase complex catalytic subunit SEC11 OS=Drosophila melanogaster OX=7227 GN=twr PE=1 SV=1	0.181081
>sp|Q9VI25|NCDN_DROME Neurochondrin homolog OS=Drosophila melanogaster OX=7227 GN=Neurochondrin PE=2 SV=1	-0.0356846		>tr|O97066|O97066_DROME Signal peptidase complex catalytic subunit SEC11 OS=Drosophila melanogaster OX=7227 GN=twr PE=1 SV=1	0.181081
>sp|Q9VI25|NCDN_DROME Neurochondrin homolog OS=Drosophila melanogaster OX=7227 GN=Neurochondrin PE=2 SV=1	-0.0356846		>sp|Q9XY35|QCR9_DROME Cytochrome b-c1 complex subunit 9 OS=Drosophila melanogaster OX=7227 GN=ox PE=3 SV=1	0.18
>tr|Q9V3D8|Q9V3D8_DROME GH27579p OS=Drosophila melanogaster OX=7227 GN=grsm PE=1 SV=1	-0.0362007		>sp|Q9XY35|QCR9_DROME Cytochrome b-c1 complex subunit 9 OS=Drosophila melanogaster OX=7227 GN=ox PE=3 SV=1	0.18
>tr|Q9V3D8|Q9V3D8_DROME GH27579p OS=Drosophila melanogaster OX=7227 GN=grsm PE=1 SV=1	-0.0362007		>sp|Q9XY35|QCR9_DROME Cytochrome b-c1 complex subunit 9 OS=Drosophila melanogaster OX=7227 GN=ox PE=3 SV=1	0.18
>tr|Q9V3D8|Q9V3D8_DROME GH27579p OS=Drosophila melanogaster OX=7227 GN=grsm PE=1 SV=1	-0.0362007		>tr|Q6GUR9|Q6GUR9_DROME ACP53C14B OS=Drosophila melanogaster OX=7227 GN=Acp53C14b PE=1 SV=1	0.179545
>sp|Q9W058|SCOT_DROME Succinyl-CoA:3-ketoacid-coenzyme A transferase, mitochondrial OS=Drosophila melanogaster OX=7227 GN=SCOT PE=1 SV=1	-0.0364341		>tr|Q6GUR9|Q6GUR9_DROME ACP53C14B OS=Drosophila melanogaster OX=7227 GN=Acp53C14b PE=1 SV=1	0.179545
>sp|P35381|ATPA_DROME ATP synthase subunit alpha, mitochondrial OS=Drosophila melanogaster OX=7227 GN=blw PE=1 SV=2	-0.0365942		>tr|Q6GUR9|Q6GUR9_DROME ACP53C14B OS=Drosophila melanogaster OX=7227 GN=Acp53C14b PE=1 SV=1	0.179545
>sp|P35381|ATPA_DROME ATP synthase subunit alpha, mitochondrial OS=Drosophila melanogaster OX=7227 GN=blw PE=1 SV=2	-0.0365942		>sp|P00334|ADH_DROME Alcohol dehydrogenase OS=Drosophila melanogaster OX=7227 GN=Adh PE=1 SV=2	0.177344
>sp|P35381|ATPA_DROME ATP synthase subunit alpha, mitochondrial OS=Drosophila melanogaster OX=7227 GN=blw PE=1 SV=2	-0.0365942		>sp|P00334|ADH_DROME Alcohol dehydrogenase OS=Drosophila melanogaster OX=7227 GN=Adh PE=1 SV=2	0.177344
>tr|Q7K511|Q7K511_DROME CG3835-RA OS=Drosophila melanogaster OX=7227 GN=D2hgdh PE=1 SV=1	-0.0377111		>sp|P00334|ADH_DROME Alcohol dehydrogenase OS=Drosophila melanogaster OX=7227 GN=Adh PE=1 SV=2	0.177344
>tr|Q7K511|Q7K511_DROME CG3835-RA OS=Drosophila melanogaster OX=7227 GN=D2hgdh PE=1 SV=1	-0.0377111		>tr|Q9VWP2|Q9VWP2_DROME RH57257p OS=Drosophila melanogaster OX=7227 GN=Dmel\CG7322 PE=1 SV=1	0.176446
>tr|Q7K511|Q7K511_DROME CG3835-RA OS=Drosophila melanogaster OX=7227 GN=D2hgdh PE=1 SV=1	-0.0377111		>tr|Q9VWP2|Q9VWP2_DROME RH57257p OS=Drosophila melanogaster OX=7227 GN=Dmel\CG7322 PE=1 SV=1	0.176446
>tr|M9PER1|M9PER1_DROME Autophagy-related 18a, isoform E OS=Drosophila melanogaster OX=7227 GN=Atg18a PE=1 SV=1	-0.038255		>tr|Q9VWP2|Q9VWP2_DROME RH57257p OS=Drosophila melanogaster OX=7227 GN=Dmel\CG7322 PE=1 SV=1	0.176446
>tr|Q95RV5|Q95RV5_DROME Ribulose-phosphate 3-epimerase OS=Drosophila melanogaster OX=7227 GN=Rpe PE=1 SV=1	-0.038914		>sp|Q9VCY8|ADRL_DROME Adiponectin receptor protein OS=Drosophila melanogaster OX=7227 GN=AdipoR PE=1 SV=2	0.175
>tr|Q95RV5|Q95RV5_DROME Ribulose-phosphate 3-epimerase OS=Drosophila melanogaster OX=7227 GN=Rpe PE=1 SV=1	-0.038914		>tr|Q9W4A6|Q9W4A6_DROME Otopetrin-like a, isoform A OS=Drosophila melanogaster OX=7227 GN=OtopLa PE=1 SV=1	0.16976
>sp|P13607|ATNA_DROME Sodium/potassium-transporting ATPase subunit alpha OS=Drosophila melanogaster OX=7227 GN=Atpalpha PE=1 SV=3 -0.049759846301633	-0.0394124		>tr|Q9W4A6|Q9W4A6_DROME Otopetrin-like a, isoform A OS=Drosophila melanogaster OX=7227 GN=OtopLa PE=1 SV=1	0.16976
>sp|Q24208|IF2G_DROME Eukaryotic translation initiation factor 2 subunit 3 OS=Drosophila melanogaster OX=7227 GN=eIF2gamma PE=2 SV=1	-0.0404211		>tr|Q9W4A6|Q9W4A6_DROME Otopetrin-like a, isoform A OS=Drosophila melanogaster OX=7227 GN=OtopLa PE=1 SV=1	0.16976
>sp|Q24208|IF2G_DROME Eukaryotic translation initiation factor 2 subunit 3 OS=Drosophila melanogaster OX=7227 GN=eIF2gamma PE=2 SV=1	-0.0404211		>tr|Q9VU29|Q9VU29_DROME Malate dehydrogenase OS=Drosophila melanogaster OX=7227 GN=Dmel\CG10749 PE=2 SV=1	0.167723
>sp|Q24208|IF2G_DROME Eukaryotic translation initiation factor 2 subunit 3 OS=Drosophila melanogaster OX=7227 GN=eIF2gamma PE=2 SV=1	-0.0404211		>tr|Q9VU29|Q9VU29_DROME Malate dehydrogenase OS=Drosophila melanogaster OX=7227 GN=Dmel\CG10749 PE=2 SV=1	0.167723
>sp|O62619|KPYK_DROME Pyruvate kinase OS=Drosophila melanogaster OX=7227 GN=PyK PE=2 SV=2	-0.0424015		>tr|Q9VU29|Q9VU29_DROME Malate dehydrogenase OS=Drosophila melanogaster OX=7227 GN=Dmel\CG10749 PE=2 SV=1	0.167723
>sp|O62619|KPYK_DROME Pyruvate kinase OS=Drosophila melanogaster OX=7227 GN=PyK PE=2 SV=2	-0.0424015		>tr|Q7KTL6|Q7KTL6_DROME LP02791p OS=Drosophila melanogaster OX=7227 GN=Nha1 PE=2 SV=1	0.165254
>sp|O62619|KPYK_DROME Pyruvate kinase OS=Drosophila melanogaster OX=7227 GN=PyK PE=2 SV=2	-0.0424015		>sp|P36179|2AAA_DROME Serine/threonine-protein phosphatase PP2A 65 kDa regulatory subunit OS=Drosophila melanogaster OX=7227 GN=Pp2A-29B PE=2 SV=4	0.165144
>sp|Q9XYZ5|DDB1_DROME DNA damage-binding protein 1 OS=Drosophila melanogaster OX=7227 GN=pic PE=1 SV=1	-0.0446491		>tr|Q0E8E8|Q0E8E8_DROME MIP08013p1 OS=Drosophila melanogaster OX=7227 GN=Mpcp2 PE=1 SV=1	0.164326
>tr|Q9VTV9|Q9VTV9_DROME Delta-aminolevulinic acid dehydratase OS=Drosophila melanogaster OX=7227 GN=Pbgs PE=1 SV=1	-0.0452599		>tr|Q0E8E8|Q0E8E8_DROME MIP08013p1 OS=Drosophila melanogaster OX=7227 GN=Mpcp2 PE=1 SV=1	0.164326
>tr|Q9VTV9|Q9VTV9_DROME Delta-aminolevulinic acid dehydratase OS=Drosophila melanogaster OX=7227 GN=Pbgs PE=1 SV=1	-0.0452599		>tr|Q0E8E8|Q0E8E8_DROME MIP08013p1 OS=Drosophila melanogaster OX=7227 GN=Mpcp2 PE=1 SV=1	0.164326
>tr|Q9W5T4|Q9W5T4_DROME RE33981p OS=Drosophila melanogaster OX=7227 GN=anon-EST:Posey268 PE=1 SV=2	-0.0460251		>tr|Q9W464|Q9W464_DROME Glycosylphosphatidylinositol anchor attachment 1 OS=Drosophila melanogaster OX=7227 GN=GAA1 PE=1 SV=1	0.162315
>tr|Q9W5T4|Q9W5T4_DROME RE33981p OS=Drosophila melanogaster OX=7227 GN=anon-EST:Posey268 PE=1 SV=2	-0.0460251		>tr|Q7KLX3|Q7KLX3_DROME GEO05407p1 OS=Drosophila melanogaster OX=7227 GN=Tapdelta PE=1 SV=1	0.159639
>tr|Q9W5T4|Q9W5T4_DROME RE33981p OS=Drosophila melanogaster OX=7227 GN=anon-EST:Posey268 PE=1 SV=2	-0.0460251		>tr|Q7KLX3|Q7KLX3_DROME GEO05407p1 OS=Drosophila melanogaster OX=7227 GN=Tapdelta PE=1 SV=1	0.159639
>tr|Q9VGQ1|Q9VGQ1_DROME GM01350p OS=Drosophila melanogaster OX=7227 GN=alpha-KGDHC PE=1 SV=1	-0.0461538		>tr|Q7KLX3|Q7KLX3_DROME GEO05407p1 OS=Drosophila melanogaster OX=7227 GN=Tapdelta PE=1 SV=1	0.159639
>tr|Q9VGQ1|Q9VGQ1_DROME GM01350p OS=Drosophila melanogaster OX=7227 GN=alpha-KGDHC PE=1 SV=1	-0.0461538		>tr|Q9VF20|Q9VF20_DROME Heavy metal tolerance factor 1 OS=Drosophila melanogaster OX=7227 GN=Hmt-1 PE=1 SV=1	0.159469
>tr|Q9VGQ1|Q9VGQ1_DROME GM01350p OS=Drosophila melanogaster OX=7227 GN=alpha-KGDHC PE=1 SV=1	-0.0461538		>tr|Q9VPD3|Q9VPD3_DROME LD10327p OS=Drosophila melanogaster OX=7227 GN=l(3)77CDf PE=1 SV=1	0.156827
>tr|Q9W5B4|Q9W5B4_DROME GH18858p OS=Drosophila melanogaster OX=7227 GN=EG:103E12.2 PE=1 SV=1	-0.0489028		>tr|Q8IN96|Q8IN96_DROME Pyrroline-5-carboxylate reductase-like 2, isoform B OS=Drosophila melanogaster OX=7227 GN=P5cr-2 PE=1 SV=1	0.155172
>tr|Q9VRJ4|Q9VRJ4_DROME SD02021p OS=Drosophila melanogaster OX=7227 GN=Dmel\CG10672 PE=1 SV=1	-0.0495268		>tr|Q8IN96|Q8IN96_DROME Pyrroline-5-carboxylate reductase-like 2, isoform B OS=Drosophila melanogaster OX=7227 GN=P5cr-2 PE=1 SV=1	0.155172
>tr|A1Z8U4|A1Z8U4_DROME Chaperonin containing TCP1 subunit 5, isoform B OS=Drosophila melanogaster OX=7227 GN=CCT5 PE=1 SV=1	-0.0496094		>tr|Q8IN96|Q8IN96_DROME Pyrroline-5-carboxylate reductase-like 2, isoform B OS=Drosophila melanogaster OX=7227 GN=P5cr-2 PE=1 SV=1	0.155172
>sp|P13607|ATNA_DROME Sodium/potassium-transporting ATPase subunit alpha OS=Drosophila melanogaster OX=7227 GN=Atpalpha PE=1 SV=3	-0.0497598		>sp|Q9VN12|NCKXH_DROME Probable sodium/potassium/calcium exchanger CG1090 OS=Drosophila melanogaster OX=7227 GN=CG1090 PE=2 SV=4	0.155134
>sp|P13607|ATNA_DROME Sodium/potassium-transporting ATPase subunit alpha OS=Drosophila melanogaster OX=7227 GN=Atpalpha PE=1 SV=3	-0.0497598		>sp|Q9VN12|NCKXH_DROME Probable sodium/potassium/calcium exchanger CG1090 OS=Drosophila melanogaster OX=7227 GN=CG1090 PE=2 SV=4	0.155134
>tr|Q9VMX9|Q9VMX9_DROME Jonah 25Biii OS=Drosophila melanogaster OX=7227 GN=Jon25Biii PE=1 SV=1	-0.0527132		>sp|Q9VN12|NCKXH_DROME Probable sodium/potassium/calcium exchanger CG1090 OS=Drosophila melanogaster OX=7227 GN=CG1090 PE=2 SV=4	0.155134
>tr|Q9W3Z3|Q9W3Z3_DROME Serine--pyruvate aminotransferase OS=Drosophila melanogaster OX=7227 GN=Spat PE=1 SV=1	-0.0527919		>sp|O17444|VACHT_DROME Vesicular acetylcholine transporter OS=Drosophila melanogaster OX=7227 GN=VAChT PE=2 SV=2	0.152422
>tr|Q9W3Z3|Q9W3Z3_DROME Serine--pyruvate aminotransferase OS=Drosophila melanogaster OX=7227 GN=Spat PE=1 SV=1	-0.0527919		>sp|O17444|VACHT_DROME Vesicular acetylcholine transporter OS=Drosophila melanogaster OX=7227 GN=VAChT PE=2 SV=2	0.152422
>tr|E1JJR9|E1JJR9_DROME Uncharacterized protein, isoform B OS=Drosophila melanogaster OX=7227 GN=Dmel\CG17065 PE=4 SV=1	-0.0531323		>sp|O17444|VACHT_DROME Vesicular acetylcholine transporter OS=Drosophila melanogaster OX=7227 GN=VAChT PE=2 SV=2	0.152422
>tr|Q9W3L4|Q9W3L4_DROME GH20802p OS=Drosophila melanogaster OX=7227 GN=Dmel\CG2233 PE=1 SV=1	-0.0533816		>tr|Q7JUS9|Q7JUS9_DROME MIP16332p OS=Drosophila melanogaster OX=7227 GN=Mpcp1 PE=1 SV=1	0.149198
>tr|Q9W3L4|Q9W3L4_DROME GH20802p OS=Drosophila melanogaster OX=7227 GN=Dmel\CG2233 PE=1 SV=1	-0.0533816		>tr|Q7JUS9|Q7JUS9_DROME MIP16332p OS=Drosophila melanogaster OX=7227 GN=Mpcp1 PE=1 SV=1	0.149198
>tr|Q9W3L4|Q9W3L4_DROME GH20802p OS=Drosophila melanogaster OX=7227 GN=Dmel\CG2233 PE=1 SV=1	-0.0533816		>tr|Q7JUS9|Q7JUS9_DROME MIP16332p OS=Drosophila melanogaster OX=7227 GN=Mpcp1 PE=1 SV=1	0.149198
>tr|Q9Y143|Q9Y143_DROME BcDNA.GH05536 OS=Drosophila melanogaster OX=7227 GN=CT18390 PE=1 SV=1	-0.0534351		>tr|Q9VZD9|Q9VZD9_DROME Peroxisomal membrane protein 34, isoform A OS=Drosophila melanogaster OX=7227 GN=PMP34 PE=3 SV=2	0.148726
>tr|Q9Y143|Q9Y143_DROME BcDNA.GH05536 OS=Drosophila melanogaster OX=7227 GN=CT18390 PE=1 SV=1	-0.0534351		>tr|Q9VZD9|Q9VZD9_DROME Peroxisomal membrane protein 34, isoform A OS=Drosophila melanogaster OX=7227 GN=PMP34 PE=3 SV=2	0.148726
>sp|P08570|RLA1_DROME 60S acidic ribosomal protein P1 OS=Drosophila melanogaster OX=7227 GN=RpLP1 PE=1 SV=2	-0.0544643		>tr|Q9VZD9|Q9VZD9_DROME Peroxisomal membrane protein 34, isoform A OS=Drosophila melanogaster OX=7227 GN=PMP34 PE=3 SV=2	0.148726
>tr|Q5U179|Q5U179_DROME RE22408p OS=Drosophila melanogaster OX=7227 GN=SmydA-7 PE=2 SV=1	-0.0559426		>sp|Q9VSH2|GR66A_DROME Gustatory receptor for bitter taste 66a OS=Drosophila melanogaster OX=7227 GN=Gr66a PE=2 SV=3	0.148387
>tr|Q7KV95|Q7KV95_DROME Purine nucleoside phosphorylase OS=Drosophila melanogaster OX=7227 GN=CG16760 PE=1 SV=1	-0.0567073		>tr|Q9VHW0|Q9VHW0_DROME AT07710p OS=Drosophila melanogaster OX=7227 GN=Dmel\CG7910 PE=2 SV=1	0.148302
>tr|Q9VVT6|Q9VVT6_DROME GEO08966p1 OS=Drosophila melanogaster OX=7227 GN=Grx1 PE=2 SV=1	-0.0605263		>tr|Q9VHW0|Q9VHW0_DROME AT07710p OS=Drosophila melanogaster OX=7227 GN=Dmel\CG7910 PE=2 SV=1	0.148302
>tr|Q9VVT6|Q9VVT6_DROME GEO08966p1 OS=Drosophila melanogaster OX=7227 GN=Grx1 PE=2 SV=1	-0.0605263		>tr|Q9VHW0|Q9VHW0_DROME AT07710p OS=Drosophila melanogaster OX=7227 GN=Dmel\CG7910 PE=2 SV=1	0.148302
>sp|Q9VW26|OAT_DROME Ornithine aminotransferase, mitochondrial OS=Drosophila melanogaster OX=7227 GN=Oat PE=2 SV=1	-0.0614849		>sp|O46199|A53E_DROME Accessory gland protein Acp53Ea OS=Drosophila melanogaster OX=7227 GN=Acp53Ea PE=2 SV=1	0.1475
>sp|Q9VW26|OAT_DROME Ornithine aminotransferase, mitochondrial OS=Drosophila melanogaster OX=7227 GN=Oat PE=2 SV=1	-0.0614849		>sp|O46199|A53E_DROME Accessory gland protein Acp53Ea OS=Drosophila melanogaster OX=7227 GN=Acp53Ea PE=2 SV=1	0.1475
>tr|M9PF46|M9PF46_DROME Uncharacterized protein, isoform G OS=Drosophila melanogaster OX=7227 GN=Prps PE=1 SV=1	-0.0630027		>sp|O46199|A53E_DROME Accessory gland protein Acp53Ea OS=Drosophila melanogaster OX=7227 GN=Acp53Ea PE=2 SV=1	0.1475
>tr|M9PF46|M9PF46_DROME Uncharacterized protein, isoform G OS=Drosophila melanogaster OX=7227 GN=Prps PE=1 SV=1	-0.0630027		>tr|Q9W4U2|Q9W4U2_DROME RH09070p OS=Drosophila melanogaster OX=7227 GN=BcDNA:RH09070 PE=1 SV=2	0.14739
>tr|M9PF46|M9PF46_DROME Uncharacterized protein, isoform G OS=Drosophila melanogaster OX=7227 GN=Prps PE=1 SV=1	-0.0630027		>tr|Q9VJ59|Q9VJ59_DROME PRA1 family protein OS=Drosophila melanogaster OX=7227 GN=Jwa PE=1 SV=5	0.14739
>tr|Q9W1H8|Q9W1H8_DROME GH13256p OS=Drosophila melanogaster OX=7227 GN=Mtpbeta PE=1 SV=1	-0.0637527		>tr|Q9W4U2|Q9W4U2_DROME RH09070p OS=Drosophila melanogaster OX=7227 GN=BcDNA:RH09070 PE=1 SV=2	0.14739
>tr|Q9W1H8|Q9W1H8_DROME GH13256p OS=Drosophila melanogaster OX=7227 GN=Mtpbeta PE=1 SV=1	-0.0637527		>tr|Q9VJ59|Q9VJ59_DROME PRA1 family protein OS=Drosophila melanogaster OX=7227 GN=Jwa PE=1 SV=5	0.14739
>tr|Q9W1H8|Q9W1H8_DROME GH13256p OS=Drosophila melanogaster OX=7227 GN=Mtpbeta PE=1 SV=1	-0.0637527		>tr|Q9VJ59|Q9VJ59_DROME PRA1 family protein OS=Drosophila melanogaster OX=7227 GN=Jwa PE=1 SV=5	0.14739
>tr|Q9VMX8|Q9VMX8_DROME Jonah 25Bii, isoform A OS=Drosophila melanogaster OX=7227 GN=Jon25Bii PE=1 SV=1	-0.0644928		>tr|Q9W4U2|Q9W4U2_DROME RH09070p OS=Drosophila melanogaster OX=7227 GN=BcDNA:RH09070 PE=1 SV=2	0.14739
>sp|Q9VCA5|SYFB_DROME Phenylalanine--tRNA ligase beta subunit OS=Drosophila melanogaster OX=7227 GN=beta-PheRS PE=1 SV=1	-0.065365		>tr|Q500Y7|Q500Y7_DROME GEO11443p1 OS=Drosophila melanogaster OX=7227 GN=UQCR-6.4 PE=2 SV=1	0.145614
>sp|Q9VCA5|SYFB_DROME Phenylalanine--tRNA ligase beta subunit OS=Drosophila melanogaster OX=7227 GN=beta-PheRS PE=1 SV=1	-0.065365		>tr|Q500Y7|Q500Y7_DROME GEO11443p1 OS=Drosophila melanogaster OX=7227 GN=UQCR-6.4 PE=2 SV=1	0.145614
>tr|A1Z9G3|A1Z9G3_DROME FI19901p1 OS=Drosophila melanogaster OX=7227 GN=S-Lap5 PE=2 SV=1	-0.0664845		>tr|Q500Y7|Q500Y7_DROME GEO11443p1 OS=Drosophila melanogaster OX=7227 GN=UQCR-6.4 PE=2 SV=1	0.145614
>tr|A1Z9G3|A1Z9G3_DROME FI19901p1 OS=Drosophila melanogaster OX=7227 GN=S-Lap5 PE=2 SV=1	-0.0664845		>tr|Q9VKM3|Q9VKM3_DROME ATP synthase subunit OS=Drosophila melanogaster OX=7227 GN=ATPsynG PE=1 SV=1	0.145455
>tr|Q9VS44|Q9VS44_DROME Uncharacterized protein OS=Drosophila melanogaster OX=7227 GN=Dmel\CG8607 PE=1 SV=2	-0.0669091		>tr|Q9VKM3|Q9VKM3_DROME ATP synthase subunit OS=Drosophila melanogaster OX=7227 GN=ATPsynG PE=1 SV=1	0.145455
>sp|Q7K486|ARMC6_DROME Armadillo repeat-containing protein 6 homolog OS=Drosophila melanogaster OX=7227 GN=CG5721 PE=1 SV=1	-0.0670259		>tr|Q9VKM3|Q9VKM3_DROME ATP synthase subunit OS=Drosophila melanogaster OX=7227 GN=ATPsynG PE=1 SV=1	0.145455
>sp|Q9W2Y3|NNRE_DROME NAD(P)H-hydrate epimerase OS=Drosophila melanogaster OX=7227 GN=Naxe PE=2 SV=2	-0.0673913		>tr|Q9VV87|Q9VV87_DROME Elongation of very long chain fatty acids protein OS=Drosophila melanogaster OX=7227 GN=Baldspot PE=2 SV=2	0.145253
>sp|Q9TVM2|XPO1_DROME Exportin-1 OS=Drosophila melanogaster OX=7227 GN=emb PE=1 SV=1	-0.0674506		>tr|Q9VV87|Q9VV87_DROME Elongation of very long chain fatty acids protein OS=Drosophila melanogaster OX=7227 GN=Baldspot PE=2 SV=2	0.145253
>sp|Q9TVM2|XPO1_DROME Exportin-1 OS=Drosophila melanogaster OX=7227 GN=emb PE=1 SV=1	-0.0674506		>tr|Q9VV87|Q9VV87_DROME Elongation of very long chain fatty acids protein OS=Drosophila melanogaster OX=7227 GN=Baldspot PE=2 SV=2	0.145253
>sp|Q9VMN5|CH60C_DROME 60 kDa heat shock protein homolog 2, mitochondrial OS=Drosophila melanogaster OX=7227 GN=Hsp60C PE=2 SV=2	-0.0677083		>tr|Q9VHR9|Q9VHR9_DROME Cytochrome c oxidase subunit 7A-like OS=Drosophila melanogaster OX=7227 GN=COX7AL PE=2 SV=1	0.14434
>sp|Q9VMN5|CH60C_DROME 60 kDa heat shock protein homolog 2, mitochondrial OS=Drosophila melanogaster OX=7227 GN=Hsp60C PE=2 SV=2	-0.0677083		>sp|Q9V429|THIO2_DROME Thioredoxin-2 OS=Drosophila melanogaster OX=7227 GN=Trx-2 PE=1 SV=3	0.142453
>sp|Q9VMN5|CH60C_DROME 60 kDa heat shock protein homolog 2, mitochondrial OS=Drosophila melanogaster OX=7227 GN=Hsp60C PE=2 SV=2	-0.0677083		>sp|Q9V429|THIO2_DROME Thioredoxin-2 OS=Drosophila melanogaster OX=7227 GN=Trx-2 PE=1 SV=3	0.142453
>sp|Q9VAN0|SERC_DROME Probable phosphoserine aminotransferase OS=Drosophila melanogaster OX=7227 GN=CG11899 PE=2 SV=1	-0.0686813		>sp|Q9V429|THIO2_DROME Thioredoxin-2 OS=Drosophila melanogaster OX=7227 GN=Trx-2 PE=1 SV=3	0.142453
>sp|Q9VAN0|SERC_DROME Probable phosphoserine aminotransferase OS=Drosophila melanogaster OX=7227 GN=CG11899 PE=2 SV=1	-0.0686813		>tr|A8QI34|A8QI34_DROME Sodium/potassium-transporting ATPase subunit alpha OS=Drosophila melanogaster OX=7227 GN=JYalpha PE=3 SV=2	0.142022
>sp|Q9VAN0|SERC_DROME Probable phosphoserine aminotransferase OS=Drosophila melanogaster OX=7227 GN=CG11899 PE=2 SV=1	-0.0686813		>tr|A8QI34|A8QI34_DROME Sodium/potassium-transporting ATPase subunit alpha OS=Drosophila melanogaster OX=7227 GN=JYalpha PE=3 SV=2	0.142022
>sp|Q7KW39|MMSA_DROME Probable methylmalonate-semialdehyde dehydrogenase [acylating], mitochondrial OS=Drosophila melanogaster OX=7227 GN=CG17896 PE=2 SV=1	-0.0690385		>tr|A8QI34|A8QI34_DROME Sodium/potassium-transporting ATPase subunit alpha OS=Drosophila melanogaster OX=7227 GN=JYalpha PE=3 SV=2	0.142022
>sp|Q7KW39|MMSA_DROME Probable methylmalonate-semialdehyde dehydrogenase [acylating], mitochondrial OS=Drosophila melanogaster OX=7227 GN=CG17896 PE=2 SV=1	-0.0690385		>sp|Q9VZM5|PIGB_DROME GPI mannosyltransferase 3 OS=Drosophila melanogaster OX=7227 GN=PIG-B PE=2 SV=2	0.141711
>sp|Q7KW39|MMSA_DROME Probable methylmalonate-semialdehyde dehydrogenase [acylating], mitochondrial OS=Drosophila melanogaster OX=7227 GN=CG17896 PE=2 SV=1	-0.0690385		>sp|Q9VZM5|PIGB_DROME GPI mannosyltransferase 3 OS=Drosophila melanogaster OX=7227 GN=PIG-B PE=2 SV=2	0.141711
>tr|X2J9A5|X2J9A5_DROME Uncharacterized protein, isoform B OS=Drosophila melanogaster OX=7227 GN=CCG31673 PE=1 SV=1	-0.0698462		>sp|Q95028|LDH_DROME L-lactate dehydrogenase OS=Drosophila melanogaster OX=7227 GN=ImpL3 PE=2 SV=1	0.140964
>tr|X2J9A5|X2J9A5_DROME Uncharacterized protein, isoform B OS=Drosophila melanogaster OX=7227 GN=CCG31673 PE=1 SV=1	-0.0698462		>sp|Q95028|LDH_DROME L-lactate dehydrogenase OS=Drosophila melanogaster OX=7227 GN=Ldh PE=2 SV=1	0.140964
>tr|A1ZBQ4|A1ZBQ4_DROME Odorant-binding protein 56g OS=Drosophila melanogaster OX=7227 GN=Obp56g PE=4 SV=1	-0.0704545		>sp|Q95028|LDH_DROME L-lactate dehydrogenase OS=Drosophila melanogaster OX=7227 GN=Ldh PE=2 SV=1	0.140964
>tr|Q9VN44|Q9VN44_DROME FI07923p OS=Drosophila melanogaster OX=7227 GN=Karybeta3 PE=1 SV=1	-0.0714932		>sp|Q9V427|INX2_DROME Innexin inx2 OS=Drosophila melanogaster OX=7227 GN=Inx2 PE=1 SV=1	0.140872
>tr|Q9VN44|Q9VN44_DROME FI07923p OS=Drosophila melanogaster OX=7227 GN=Karybeta3 PE=1 SV=1	-0.0714932		>sp|Q9V427|INX2_DROME Innexin inx2 OS=Drosophila melanogaster OX=7227 GN=Inx2 PE=1 SV=1	0.140872
>tr|Q9VFN5|Q9VFN5_DROME AT30951p OS=Drosophila melanogaster OX=7227 GN=anon-WO0140519.48 PE=1 SV=1	-0.0715686		>sp|Q9V427|INX2_DROME Innexin inx2 OS=Drosophila melanogaster OX=7227 GN=Inx2 PE=1 SV=1	0.140872
>tr|Q9VFN5|Q9VFN5_DROME AT30951p OS=Drosophila melanogaster OX=7227 GN=anon-WO0140519.48 PE=1 SV=1	-0.0715686		>tr|Q9VCY7|Q9VCY7_DROME Elongation of very long chain fatty acids protein OS=Drosophila melanogaster OX=7227 GN=bond PE=2 SV=1	0.13913
>tr|Q8IRN0|Q8IRN0_DROME FI06485p OS=Drosophila melanogaster OX=7227 GN=CG7090 PE=1 SV=1	-0.0722892		>tr|Q9VCY7|Q9VCY7_DROME Elongation of very long chain fatty acids protein OS=Drosophila melanogaster OX=7227 GN=bond PE=2 SV=1	0.13913
>tr|Q9VWT3|Q9VWT3_DROME Gamma-glutamyl transpeptidase, isoform A OS=Drosophila melanogaster OX=7227 GN=Ggt-1 PE=2 SV=2	-0.0734024		>tr|Q9V3F8|Q9V3F8_DROME Pyrroline-5-carboxylate reductase OS=Drosophila melanogaster OX=7227 GN=P5cr PE=1 SV=1	0.134286
>tr|Q7PLB8|Q7PLB8_DROME Fatty acid synthase 3 OS=Drosophila melanogaster OX=7227 GN=FASN3 PE=1 SV=3	-0.0754804		>sp|Q9VAS7|INX3_DROME Innexin inx3 OS=Drosophila melanogaster OX=7227 GN=Inx3 PE=1 SV=1	0.132911
>tr|Q7PLB8|Q7PLB8_DROME Fatty acid synthase 3 OS=Drosophila melanogaster OX=7227 GN=FASN3 PE=1 SV=3	-0.0754804		>tr|Q9VDE2|Q9VDE2_DROME Uncharacterized protein, isoform B OS=Drosophila melanogaster OX=7227 GN=Dmel\CG5793 PE=1 SV=3	0.131364
>tr|Q7PLB8|Q7PLB8_DROME Fatty acid synthase 3 OS=Drosophila melanogaster OX=7227 GN=FASN3 PE=1 SV=3	-0.0754804		>tr|Q9VDE2|Q9VDE2_DROME Uncharacterized protein, isoform B OS=Drosophila melanogaster OX=7227 GN=Dmel\CG5793 PE=1 SV=3	0.131364
>tr|Q9VAG9|Q9VAG9_DROME LD34542p OS=Drosophila melanogaster OX=7227 GN=Dmel\CG7789 PE=1 SV=1	-0.075817		>tr|Q9VDE2|Q9VDE2_DROME Uncharacterized protein, isoform B OS=Drosophila melanogaster OX=7227 GN=Dmel\CG5793 PE=1 SV=3	0.131364
>tr|Q9VAG9|Q9VAG9_DROME LD34542p OS=Drosophila melanogaster OX=7227 GN=Dmel\CG7789 PE=1 SV=1	-0.075817		>tr|Q9VT15|Q9VT15_DROME GH14734p OS=Drosophila melanogaster OX=7227 GN=Dmel\CG3088 PE=2 SV=1	0.131349
>sp|P29613|TPIS_DROME Triosephosphate isomerase OS=Drosophila melanogaster OX=7227 GN=Tpi PE=1 SV=3	-0.0773279		>tr|Q9VT15|Q9VT15_DROME GH14734p OS=Drosophila melanogaster OX=7227 GN=Dmel\CG3088 PE=2 SV=1	0.131349
>sp|P29613|TPIS_DROME Triosephosphate isomerase OS=Drosophila melanogaster OX=7227 GN=Tpi PE=1 SV=3	-0.0773279		>tr|Q9VT15|Q9VT15_DROME GH14734p OS=Drosophila melanogaster OX=7227 GN=Dmel\CG3088 PE=2 SV=1	0.131349
>sp|P29613|TPIS_DROME Triosephosphate isomerase OS=Drosophila melanogaster OX=7227 GN=Tpi PE=1 SV=3	-0.0773279		>tr|Q9VRS4|Q9VRS4_DROME Machete OS=Drosophila melanogaster OX=7227 GN=yip7 PE=1 SV=1	0.131111
>tr|Q9GNH8|Q9GNH8_DROME Phosphotransferase OS=Drosophila melanogaster OX=7227 GN=Hex-A PE=1 SV=1	-0.0779018		>tr|Q9VRS4|Q9VRS4_DROME Machete OS=Drosophila melanogaster OX=7227 GN=yip7 PE=1 SV=1	0.131111
>tr|Q9V397|Q9V397_DROME BcDNA.GH12558 OS=Drosophila melanogaster OX=7227 GN=Mtpalpha PE=1 SV=1	-0.0786718		>sp|Q9VR07|INE_DROME Sodium- and chloride-dependent GABA transporter ine OS=Drosophila melanogaster OX=7227 GN=ine PE=1 SV=1	0.128526
>tr|Q9V397|Q9V397_DROME BcDNA.GH12558 OS=Drosophila melanogaster OX=7227 GN=Mtpalpha PE=1 SV=1	-0.0786718		>tr|E1JIQ2|E1JIQ2_DROME GluClalpha, isoform F OS=Drosophila melanogaster OX=7227 GN=GluClalpha PE=3 SV=1	0.126361
>tr|Q9V397|Q9V397_DROME BcDNA.GH12558 OS=Drosophila melanogaster OX=7227 GN=Mtpalpha PE=1 SV=1	-0.0786718		>tr|E1JIQ2|E1JIQ2_DROME GluClalpha, isoform F OS=Drosophila melanogaster OX=7227 GN=GluClalpha PE=3 SV=1	0.126361
>tr|E6EK17|E6EK17_DROME Calcium-transporting ATPase OS=Drosophila melanogaster OX=7227 GN=PMCA PE=1 SV=1	-0.0786858		>tr|Q9VGF7|Q9VGF7_DROME Glutamate carrier 1, isoform A OS=Drosophila melanogaster OX=7227 GN=GC1 PE=1 SV=1	0.126168
>tr|Q9VIS3|Q9VIS3_DROME Fructose-1,6-bisphosphatase OS=Drosophila melanogaster OX=7227 GN=fbp PE=1 SV=1	-0.0790419		>tr|Q9VGF7|Q9VGF7_DROME Glutamate carrier 1, isoform A OS=Drosophila melanogaster OX=7227 GN=GC1 PE=1 SV=1	0.126168
>tr|Q9VIS3|Q9VIS3_DROME Fructose-1,6-bisphosphatase OS=Drosophila melanogaster OX=7227 GN=fbp PE=1 SV=1	-0.0790419		>tr|Q9VGF7|Q9VGF7_DROME Glutamate carrier 1, isoform A OS=Drosophila melanogaster OX=7227 GN=GC1 PE=1 SV=1	0.126168
>tr|Q9VIS3|Q9VIS3_DROME Fructose-1,6-bisphosphatase OS=Drosophila melanogaster OX=7227 GN=fbp PE=1 SV=1	-0.0790419		>tr|Q9VV51|Q9VV51_DROME 1-Acylglycerol-3-phosphate O-acyltransferase 3, isoform A OS=Drosophila melanogaster OX=7227 GN=Agpat3 PE=1 SV=1	0.125389
>tr|Q9VW57|Q9VW57_DROME Grasp65 OS=Drosophila melanogaster OX=7227 GN=Grasp65 PE=1 SV=1	-0.0793478		>tr|Q9VV51|Q9VV51_DROME 1-Acylglycerol-3-phosphate O-acyltransferase 3, isoform A OS=Drosophila melanogaster OX=7227 GN=Agpat3 PE=1 SV=1	0.125389
>tr|Q9VII7|Q9VII7_DROME Serpin 38F, isoform A OS=Drosophila melanogaster OX=7227 GN=Spn38F PE=3 SV=3	-0.0798387		>tr|Q9VV51|Q9VV51_DROME 1-Acylglycerol-3-phosphate O-acyltransferase 3, isoform A OS=Drosophila melanogaster OX=7227 GN=Agpat3 PE=1 SV=1	0.125389
>tr|Q9VII7|Q9VII7_DROME Serpin 38F, isoform A OS=Drosophila melanogaster OX=7227 GN=Spn38F PE=3 SV=3	-0.0798387		>tr|Q0E8H7|Q0E8H7_DROME FI19426p1 OS=Drosophila melanogaster OX=7227 GN=SP1173 PE=2 SV=1	0.125101
>sp|Q9V3Y3|DFP_DROME Defense protein l(2)34Fc OS=Drosophila melanogaster OX=7227 GN=l(2)34Fc PE=2 SV=1	-0.0798742		>sp|Q8MSU3|FRRS1_DROME Putative ferric-chelate reductase 1 homolog OS=Drosophila melanogaster OX=7227 GN=CG8399 PE=2 SV=1	0.124884
>sp|Q7KR04|RS15B_DROME 40S ribosomal protein S15Ab OS=Drosophila melanogaster OX=7227 GN=RpS15Ab PE=2 SV=3	-0.08		>sp|Q8MSU3|FRRS1_DROME Putative ferric-chelate reductase 1 homolog OS=Drosophila melanogaster OX=7227 GN=CG8399 PE=2 SV=1	0.124884
>tr|Q0KHZ6|Q0KHZ6_DROME Uncharacterized protein, isoform A OS=Drosophila melanogaster OX=7227 GN=ETFB PE=1 SV=1	-0.0802372		>tr|Q9W5C2|Q9W5C2_DROME Translocating chain-associated membrane protein OS=Drosophila melanogaster OX=7227 GN=TRAM PE=1 SV=1	0.124728
>tr|Q0KHZ6|Q0KHZ6_DROME Uncharacterized protein, isoform A OS=Drosophila melanogaster OX=7227 GN=ETFB PE=1 SV=1	-0.0802372		>tr|Q9W5C2|Q9W5C2_DROME Translocating chain-associated membrane protein OS=Drosophila melanogaster OX=7227 GN=TRAM PE=1 SV=1	0.124728
>tr|Q0KHZ6|Q0KHZ6_DROME Electron transfer flavoprotein subunit beta OS=Drosophila melanogaster OX=7227 GN=ETFB PE=1 SV=1	-0.0802372		>tr|Q9VPR1|Q9VPR1_DROME GH02075p OS=Drosophila melanogaster OX=7227 GN=Tspo PE=1 SV=1	0.122162
>tr|A1ZB70|A1ZB70_DROME Glutathione S transferase E5 OS=Drosophila melanogaster OX=7227 GN=GstE5 PE=1 SV=1	-0.0815315		>tr|Q9VPR1|Q9VPR1_DROME GH02075p OS=Drosophila melanogaster OX=7227 GN=Tspo PE=1 SV=1	0.122162
>tr|Q9VUW4|Q9VUW4_DROME Inositol-1-monophosphatase OS=Drosophila melanogaster OX=7227 GN=IMP PE=1 SV=1	-0.0819444		>tr|Q9VPR1|Q9VPR1_DROME GH02075p OS=Drosophila melanogaster OX=7227 GN=Tspo PE=1 SV=1	0.122162
>tr|Q9VXC9|Q9VXC9_DROME RH40504p OS=Drosophila melanogaster OX=7227 GN=SP99 PE=2 SV=1	-0.0828685		>tr|Q9W258|Q9W258_DROME Babos, isoform A OS=Drosophila melanogaster OX=7227 GN=babos PE=2 SV=2	0.121939
>tr|Q9VXC9|Q9VXC9_DROME RH40504p OS=Drosophila melanogaster OX=7227 GN=SP99 PE=2 SV=1	-0.0828685		>tr|Q9W258|Q9W258_DROME Babos, isoform A OS=Drosophila melanogaster OX=7227 GN=babos PE=2 SV=2	0.121939
>tr|A1Z8Z9|A1Z8Z9_DROME Uncharacterized protein OS=Drosophila melanogaster OX=7227 GN=mdcds_23070 PE=1 SV=1	-0.0829907		>sp|P22815|BOSS_DROME Protein bride of sevenless OS=Drosophila melanogaster OX=7227 GN=boss PE=2 SV=3	0.119531
>tr|A1Z8Z9|A1Z8Z9_DROME Uncharacterized protein OS=Drosophila melanogaster OX=7227 GN=mdcds_23070 PE=1 SV=1	-0.0829907		>sp|P22815|BOSS_DROME Protein bride of sevenless OS=Drosophila melanogaster OX=7227 GN=boss PE=2 SV=3	0.119531
>tr|Q9VFQ9|Q9VFQ9_DROME Dipeptidase B, isoform A OS=Drosophila melanogaster OX=7227 GN=Dip-B PE=1 SV=2	-0.084252		>sp|P22815|BOSS_DROME Protein bride of sevenless OS=Drosophila melanogaster OX=7227 GN=boss PE=2 SV=3	0.119531
>tr|Q9VFQ9|Q9VFQ9_DROME Dipeptidase B, isoform A OS=Drosophila melanogaster OX=7227 GN=Dip-B PE=1 SV=2	-0.084252		>tr|Q9VNQ3|Q9VNQ3_DROME ER membrane protein complex subunit 4 OS=Drosophila melanogaster OX=7227 GN=EMC4 PE=1 SV=1	0.11747
>tr|Q9VFQ9|Q9VFQ9_DROME Dipeptidase B, isoform A OS=Drosophila melanogaster OX=7227 GN=Dip-B PE=1 SV=2	-0.084252		>tr|Q9VNQ3|Q9VNQ3_DROME ER membrane protein complex subunit 4 OS=Drosophila melanogaster OX=7227 GN=EMC4 PE=1 SV=1	0.11747
>sp|Q9VF71|CUTC_DROME Copper homeostasis protein cutC homolog OS=Drosophila melanogaster OX=7227 GN=CG6136 PE=2 SV=1	-0.0844106		>tr|Q9W3N1|Q9W3N1_DROME RH59310p OS=Drosophila melanogaster OX=7227 GN=spidey PE=1 SV=1	0.114019
>sp|Q95RA9|GILT1_DROME GILT-like protein 1 OS=Drosophila melanogaster OX=7227 GN=GILT1 PE=1 SV=1	-0.086		>tr|Q9W3N1|Q9W3N1_DROME RH59310p OS=Drosophila melanogaster OX=7227 GN=spidey PE=1 SV=1	0.114019
>sp|Q95RA9|GILT1_DROME GILT-like protein 1 OS=Drosophila melanogaster OX=7227 GN=GILT1 PE=1 SV=1	-0.086		>tr|Q9W3N1|Q9W3N1_DROME RH59310p OS=Drosophila melanogaster OX=7227 GN=spidey PE=1 SV=1	0.114019
>sp|Q95RA9|GILT1_DROME GILT-like protein 1 OS=Drosophila melanogaster OX=7227 GN=GILT1 PE=1 SV=1	-0.086		>tr|Q9VHG4|Q9VHG4_DROME ATPase H+ transporting accessory protein 2 OS=Drosophila melanogaster OX=7227 GN=ATP6AP2 PE=1 SV=1	0.113125
>tr|Q7K088|Q7K088_DROME GEO08224p1 OS=Drosophila melanogaster OX=7227 GN=Obp56e PE=1 SV=1	-0.0863636		>sp|Q9VHG4|RENR_DROME ATPase H(+)-transporting accessory protein 2 OS=Drosophila melanogaster OX=7227 GN=ATP6AP2 PE=1 SV=1	0.113125
>tr|Q7K088|Q7K088_DROME GEO08224p1 OS=Drosophila melanogaster OX=7227 GN=Obp56e PE=1 SV=1	-0.0863636		>tr|Q9VES7|Q9VES7_DROME Fatty acyl-CoA reductase OS=Drosophila melanogaster OX=7227 GN=Dmel\CG17562 PE=2 SV=2	0.112625
>tr|Q7K088|Q7K088_DROME GEO08224p1 OS=Drosophila melanogaster OX=7227 GN=Obp56e PE=1 SV=1	-0.0863636		>tr|Q6IHT7|Q6IHT7_DROME HDC01001 OS=Drosophila melanogaster OX=7227 GN=Sfp26Ad PE=4 SV=1	0.112397
>tr|Q7KIS4|Q7KIS4_DROME N-terminal amidohydrolase 1, isoform C OS=Drosophila melanogaster OX=7227 GN=Ntan1 PE=1 SV=1	-0.0874194		>tr|Q6IHT7|Q6IHT7_DROME HDC01001 OS=Drosophila melanogaster OX=7227 GN=Sfp26Ad PE=4 SV=1	0.112397
>tr|Q9VXI1|Q9VXI1_DROME Beta hydroxy acid dehydrogenase 1, isoform A OS=Drosophila melanogaster OX=7227 GN=Had1 PE=1 SV=2	-0.087619		>sp|Q9V8M5|3HIDH_DROME Probable 3-hydroxyisobutyrate dehydrogenase, mitochondrial OS=Drosophila melanogaster OX=7227 GN=CG15093 PE=2 SV=2	0.112037
>tr|Q9VXI1|Q9VXI1_DROME Beta hydroxy acid dehydrogenase 1, isoform A OS=Drosophila melanogaster OX=7227 GN=Had1 PE=1 SV=2	-0.087619		>sp|Q9V8M5|3HIDH_DROME Probable 3-hydroxyisobutyrate dehydrogenase, mitochondrial OS=Drosophila melanogaster OX=7227 GN=CG15093 PE=2 SV=2	0.112037
>tr|Q9VXI1|Q9VXI1_DROME Beta hydroxy acid dehydrogenase 1, isoform A OS=Drosophila melanogaster OX=7227 GN=Had1 PE=1 SV=2	-0.087619		>sp|Q9V8M5|3HIDH_DROME Probable 3-hydroxyisobutyrate dehydrogenase, mitochondrial OS=Drosophila melanogaster OX=7227 GN=CG15093 PE=2 SV=2	0.112037
>tr|Q9VQ78|Q9VQ78_DROME LD16031p OS=Drosophila melanogaster OX=7227 GN=TBCD PE=1 SV=1	-0.0877208		>tr|H5V8B8|H5V8B8_DROME MIP33436p1 OS=Drosophila melanogaster OX=7227 GN=Pp2A-29B PE=1 SV=1	0.110769
>tr|Q8I725|Q8I725_DROME Uncharacterized protein OS=Drosophila melanogaster OX=7227 GN=Dmel\CG1236 PE=1 SV=2	-0.0887608		>tr|H5V8B8|H5V8B8_DROME MIP33436p1 OS=Drosophila melanogaster OX=7227 GN=Pp2A-29B PE=1 SV=1	0.110769
>tr|Q8I725|Q8I725_DROME Uncharacterized protein OS=Drosophila melanogaster OX=7227 GN=Dmel\CG1236 PE=1 SV=2	-0.0887608		>tr|Q9VKI8|Q9VKI8_DROME GH03305p OS=Drosophila melanogaster OX=7227 GN=GH26 PE=1 SV=1	0.109036
>tr|Q8I725|Q8I725_DROME Uncharacterized protein OS=Drosophila melanogaster OX=7227 GN=Dmel\CG1236 PE=1 SV=2	-0.0887608		>tr|Q9VKI8|Q9VKI8_DROME GH03305p OS=Drosophila melanogaster OX=7227 GN=GH26 PE=1 SV=1	0.109036
>tr|Q95R35|Q95R35_DROME AT09752p OS=Drosophila melanogaster OX=7227 GN=S-Lap4 PE=1 SV=1	-0.0891221		>tr|Q9VKI8|Q9VKI8_DROME GH03305p OS=Drosophila melanogaster OX=7227 GN=GH26 PE=1 SV=1	0.109036
>tr|Q95R35|Q95R35_DROME AT09752p OS=Drosophila melanogaster OX=7227 GN=S-Lap4 PE=1 SV=1	-0.0891221		>tr|Q8IPE2|Q8IPE2_DROME Nicotinic acetylcholine receptor alpha6, isoform C OS=Drosophila melanogaster OX=7227 GN=nAChRalpha6 PE=3 SV=2	0.108097
>sp|Q9VG17|CP304_DROME Probable cytochrome P450 304a1 OS=Drosophila melanogaster OX=7227 GN=Cyp304a1 PE=2 SV=2	-0.0898039		>tr|Q9V3Y4|Q9V3Y4_DROME LD43650p OS=Drosophila melanogaster OX=7227 GN=Mtch PE=1 SV=1	0.107595
>tr|A1ZB71|A1ZB71_DROME Glutathione S transferase E6 OS=Drosophila melanogaster OX=7227 GN=GstE6 PE=1 SV=1	-0.0900901		>tr|Q9V3Y4|Q9V3Y4_DROME LD43650p OS=Drosophila melanogaster OX=7227 GN=Mtch PE=1 SV=1	0.107595
>tr|A1ZB71|A1ZB71_DROME Glutathione S transferase E6 OS=Drosophila melanogaster OX=7227 GN=GstE6 PE=1 SV=1	-0.0900901		>tr|Q9V3Y4|Q9V3Y4_DROME LD43650p OS=Drosophila melanogaster OX=7227 GN=Mtch PE=1 SV=1	0.107595
>tr|A1ZB71|A1ZB71_DROME Glutathione S transferase E6 OS=Drosophila melanogaster OX=7227 GN=GstE6 PE=1 SV=1	-0.0900901		>tr|Q9W370|Q9W370_DROME GEO12084p1 OS=Drosophila melanogaster OX=7227 GN=Dmel\CG15369 PE=1 SV=1	0.105738
>tr|Q9VU92|Q9VU92_DROME Uncharacterized protein OS=Drosophila melanogaster OX=7227 GN=FOHSDR PE=3 SV=2	-0.0904762		>tr|Q9W370|Q9W370_DROME GEO12084p1 OS=Drosophila melanogaster OX=7227 GN=Dmel\CG15369 PE=1 SV=1	0.105738
>tr|Q9VU92|Q9VU92_DROME Uncharacterized protein OS=Drosophila melanogaster OX=7227 GN=FOHSDR PE=3 SV=2	-0.0904762		>tr|Q9W370|Q9W370_DROME GEO12084p1 OS=Drosophila melanogaster OX=7227 GN=Dmel\CG15369 PE=1 SV=1	0.105738
>tr|Q9VFW4|Q9VFW4_DROME MIP09035p OS=Drosophila melanogaster OX=7227 GN=poly PE=1 SV=1	-0.0916335		>sp|P22700|ATC1_DROME Calcium-transporting ATPase sarcoplasmic/endoplasmic reticulum type OS=Drosophila melanogaster OX=7227 GN=Ca-P60A PE=1 SV=2	0.10451
>sp|Q9I7S8|PUR6_DROME Multifunctional protein ADE2 OS=Drosophila melanogaster OX=7227 GN=ade5 PE=2 SV=2	-0.093007		>sp|P22700|ATC1_DROME Calcium-transporting ATPase sarcoplasmic/endoplasmic reticulum type OS=Drosophila melanogaster OX=7227 GN=SERCA PE=1 SV=2	0.10451
>sp|Q9I7S8|PUR6_DROME Multifunctional protein ADE2 OS=Drosophila melanogaster OX=7227 GN=ade5 PE=2 SV=2	-0.093007		>sp|P22700|ATC1_DROME Calcium-transporting ATPase sarcoplasmic/endoplasmic reticulum type OS=Drosophila melanogaster OX=7227 GN=SERCA PE=1 SV=2	0.10451
>sp|Q9I7S8|PUR6_DROME Multifunctional protein ADE2 OS=Drosophila melanogaster OX=7227 GN=ade5 PE=2 SV=2	-0.093007		>sp|P27716|INX1_DROME Innexin inx1 OS=Drosophila melanogaster OX=7227 GN=ogre PE=1 SV=1	0.104144
>tr|Q9VVL5|Q9VVL5_DROME FI11325p OS=Drosophila melanogaster OX=7227 GN=Dmel\CG5567 PE=1 SV=1	-0.0957576		>sp|P27716|INX1_DROME Innexin inx1 OS=Drosophila melanogaster OX=7227 GN=ogre PE=1 SV=1	0.104144
>tr|Q9VVL5|Q9VVL5_DROME FI11325p OS=Drosophila melanogaster OX=7227 GN=Dmel\CG5567 PE=1 SV=1	-0.0957576		>tr|Q9VZ24|Q9VZ24_DROME GEO11412p1 OS=Drosophila melanogaster OX=7227 GN=Dmel\CG15201 PE=2 SV=1	0.102655
>tr|Q9VVL5|Q9VVL5_DROME FI11325p OS=Drosophila melanogaster OX=7227 GN=Dmel\CG5567 PE=1 SV=1	-0.0957576		>tr|Q9VZ24|Q9VZ24_DROME GEO11412p1 OS=Drosophila melanogaster OX=7227 GN=Dmel\CG15201 PE=2 SV=1	0.102655
>tr|Q0E8T1|Q0E8T1_DROME Uncharacterized protein, isoform B OS=Drosophila melanogaster OX=7227 GN=anon-SAGE:Wang-122 PE=3 SV=1	-0.095858		>tr|Q9VZ24|Q9VZ24_DROME GEO11412p1 OS=Drosophila melanogaster OX=7227 GN=Dmel\CG15201 PE=2 SV=1	0.102655
>tr|Q9VDT1|Q9VDT1_DROME Arc42 OS=Drosophila melanogaster OX=7227 GN=Arc42 PE=1 SV=1	-0.0960494		>tr|Q9VPJ9|Q9VPJ9_DROME Uncharacterized protein, isoform B OS=Drosophila melanogaster OX=7227 GN=CK02656 PE=1 SV=2	0.102292
>sp|P41572|6PGD_DROME 6-phosphogluconate dehydrogenase, decarboxylating OS=Drosophila melanogaster OX=7227 GN=Pgd PE=2 SV=1	-0.0960499		>tr|Q9VPJ9|Q9VPJ9_DROME Uncharacterized protein, isoform B OS=Drosophila melanogaster OX=7227 GN=CK02656 PE=1 SV=2	0.102292
>sp|P41572|6PGD_DROME 6-phosphogluconate dehydrogenase, decarboxylating OS=Drosophila melanogaster OX=7227 GN=Pgd PE=2 SV=1	-0.0960499		>tr|Q9VPJ9|Q9VPJ9_DROME Uncharacterized protein, isoform B OS=Drosophila melanogaster OX=7227 GN=CK02656 PE=1 SV=2	0.102292
>sp|P41572|6PGD_DROME 6-phosphogluconate dehydrogenase, decarboxylating OS=Drosophila melanogaster OX=7227 GN=Pgd PE=2 SV=1	-0.0960499		>tr|Q9V449|Q9V449_DROME MET75Ca protein OS=Drosophila melanogaster OX=7227 GN=Met75Ca PE=1 SV=1	0.101961
>tr|Q86BM0|Q86BM0_DROME Uncharacterized protein, isoform A OS=Drosophila melanogaster OX=7227 GN=gh06087 PE=3 SV=1	-0.0980861		>tr|Q9V449|Q9V449_DROME MET75Ca protein OS=Drosophila melanogaster OX=7227 GN=Met75Ca PE=1 SV=1	0.101961
>sp|Q7YTY6|SP42D_DROME Serine protease inhibitor 42Dd OS=Drosophila melanogaster OX=7227 GN=Spn42Dd PE=2 SV=1	-0.0983871		>tr|Q86BQ3|Q86BQ3_DROME Uncharacterized protein, isoform A OS=Drosophila melanogaster OX=7227 GN=Dmel\CG13284 PE=3 SV=1	0.100308
>sp|Q7YTY6|SP42D_DROME Serine protease inhibitor 42Dd OS=Drosophila melanogaster OX=7227 GN=Spn42Dd PE=2 SV=1	-0.0983871		>tr|Q86BQ3|Q86BQ3_DROME Uncharacterized protein, isoform A OS=Drosophila melanogaster OX=7227 GN=Dmel\CG13284 PE=3 SV=1	0.100308
>sp|Q7YTY6|SP42D_DROME Serine protease inhibitor 42Dd OS=Drosophila melanogaster OX=7227 GN=Spn42Dd PE=2 SV=1	-0.0983871		>sp|P56538|IF6_DROME Eukaryotic translation initiation factor 6 OS=Drosophila melanogaster OX=7227 GN=eIF6 PE=2 SV=3	0.0991837
>sp|Q7YTY6|SP42D_DROME Serine protease inhibitor 42Dd OS=Drosophila melanogaster OX=7227 GN=Spn42Dd PE=2 SV=1	-0.0983871		>sp|P56538|IF6_DROME Eukaryotic translation initiation factor 6 OS=Drosophila melanogaster OX=7227 GN=eIF6 PE=2 SV=3	0.0991837
>sp|P23779|CYTL_DROME Cystatin-like protein OS=Drosophila melanogaster OX=7227 GN=Cys PE=2 SV=2	-0.0984127		>sp|P56538|IF6_DROME Eukaryotic translation initiation factor 6 OS=Drosophila melanogaster OX=7227 GN=eIF6 PE=2 SV=3	0.0991837
>sp|Q9VWH4|IDH3A_DROME Probable isocitrate dehydrogenase [NAD] subunit alpha, mitochondrial OS=Drosophila melanogaster OX=7227 GN=Idh3a PE=2 SV=1	-0.1		>tr|Q9VEB1|Q9VEB1_DROME IP09655p OS=Drosophila melanogaster OX=7227 GN=Mdh2 PE=1 SV=1	0.0991071
>sp|Q9VWH4|IDH3A_DROME Probable isocitrate dehydrogenase [NAD] subunit alpha, mitochondrial OS=Drosophila melanogaster OX=7227 GN=Idh3a PE=2 SV=1	-0.1		>tr|Q9VEB1|Q9VEB1_DROME IP09655p OS=Drosophila melanogaster OX=7227 GN=Mdh2 PE=1 SV=1	0.0991071
>sp|Q9VWH4|IDH3A_DROME Probable isocitrate dehydrogenase [NAD] subunit alpha, mitochondrial OS=Drosophila melanogaster OX=7227 GN=Idh3a PE=2 SV=1	-0.1		>tr|Q9VEB1|Q9VEB1_DROME IP09655p OS=Drosophila melanogaster OX=7227 GN=Mdh2 PE=1 SV=1	0.0991071
>sp|P19889|RLA0_DROME 60S acidic ribosomal protein P0 OS=Drosophila melanogaster OX=7227 GN=RpLP0 PE=1 SV=1	-0.100315		>sp|Q9VVX5|MBOA5_DROME Lysophospholipid acyltransferase 5 OS=Drosophila melanogaster OX=7227 GN=nes PE=1 SV=1	0.0985915
>sp|P19889|RLA0_DROME 60S acidic ribosomal protein P0 OS=Drosophila melanogaster OX=7227 GN=RpLP0 PE=1 SV=1	-0.100315		>sp|O18404|HCD2_DROME 3-hydroxyacyl-CoA dehydrogenase type-2 OS=Drosophila melanogaster OX=7227 GN=scu PE=1 SV=1	0.0984314
>sp|P19889|RLA0_DROME 60S acidic ribosomal protein P0 OS=Drosophila melanogaster OX=7227 GN=RpLP0 PE=1 SV=1	-0.100315		>sp|O18404|HCD2_DROME 3-hydroxyacyl-CoA dehydrogenase type-2 OS=Drosophila melanogaster OX=7227 GN=scu PE=1 SV=1	0.0984314
>tr|Q7JXZ2|Q7JXZ2_DROME Ecdysone-induced protein 55E, isoform A OS=Drosophila melanogaster OX=7227 GN=Eip55E PE=1 SV=1	-0.100509		>sp|O18404|HCD2_DROME 3-hydroxyacyl-CoA dehydrogenase type-2 OS=Drosophila melanogaster OX=7227 GN=scu PE=1 SV=1	0.0984314
>tr|Q7JXZ2|Q7JXZ2_DROME Ecdysone-induced protein 55E, isoform A OS=Drosophila melanogaster OX=7227 GN=Eip55E PE=1 SV=1	-0.100509		>tr|Q9VV49|Q9VV49_DROME 1-Acylglycerol-3-phosphate O-acyltransferase 4, isoform A OS=Drosophila melanogaster OX=7227 GN=Agpat4 PE=2 SV=1	0.0984211
>tr|Q7JXZ2|Q7JXZ2_DROME Ecdysone-induced protein 55E, isoform A OS=Drosophila melanogaster OX=7227 GN=Eip55E PE=1 SV=1	-0.100509		>tr|Q9VV49|Q9VV49_DROME 1-Acylglycerol-3-phosphate O-acyltransferase 4, isoform A OS=Drosophila melanogaster OX=7227 GN=Agpat4 PE=2 SV=1	0.0984211
>tr|Q9VC92|Q9VC92_DROME GH15945p OS=Drosophila melanogaster OX=7227 GN=Dmel\CG6432 PE=2 SV=1	-0.101039		>tr|M9NEV7|M9NEV7_DROME Uncharacterized protein, isoform B OS=Drosophila melanogaster OX=7227 GN=BcDNA:RE71975 PE=1 SV=1	0.0973913
>tr|Q9VC92|Q9VC92_DROME GH15945p OS=Drosophila melanogaster OX=7227 GN=Dmel\CG6432 PE=2 SV=1	-0.101039		>tr|O62526|O62526_DROME ADP/ATP translocase OS=Drosophila melanogaster OX=7227 GN=Ant2 PE=2 SV=1	0.0964169
>tr|Q9W3H4|Q9W3H4_DROME LD36273p OS=Drosophila melanogaster OX=7227 GN=sni PE=1 SV=1	-0.101619		>tr|Q9VAU1|Q9VAU1_DROME Snustorr, isoform A OS=Drosophila melanogaster OX=7227 GN=snu PE=1 SV=1	0.0955446
>tr|A1ZB68|A1ZB68_DROME FI01423p OS=Drosophila melanogaster OX=7227 GN=GstE3 PE=1 SV=1	-0.101818		>tr|Q9VAU1|Q9VAU1_DROME Snustorr, isoform A OS=Drosophila melanogaster OX=7227 GN=snu PE=1 SV=1	0.0955446
>tr|A1ZB68|A1ZB68_DROME FI01423p OS=Drosophila melanogaster OX=7227 GN=GstE3 PE=1 SV=1	-0.101818		>tr|Q9VL70|Q9VL70_DROME HL08109p OS=Drosophila melanogaster OX=7227 GN=yip2 PE=1 SV=1	0.0952261
>tr|A1ZB68|A1ZB68_DROME FI01423p OS=Drosophila melanogaster OX=7227 GN=GstE3 PE=1 SV=1	-0.101818		>tr|Q9VL70|Q9VL70_DROME HL08109p OS=Drosophila melanogaster OX=7227 GN=yip2 PE=1 SV=1	0.0952261
>sp|Q8INF7|DAAF5_DROME Dynein assembly factor 5, axonemal OS=Drosophila melanogaster OX=7227 GN=HEATR2 PE=2 SV=1	-0.102367		>tr|Q9VL70|Q9VL70_DROME HL08109p OS=Drosophila melanogaster OX=7227 GN=yip2 PE=1 SV=1	0.0952261
>sp|P80455|RS12_DROME 40S ribosomal protein S12 OS=Drosophila melanogaster OX=7227 GN=RpS12 PE=1 SV=2	-0.102878		>tr|Q9VKR0|Q9VKR0_DROME ER membrane protein complex subunit 3 OS=Drosophila melanogaster OX=7227 GN=EMC3 PE=1 SV=1	0.0951417
>tr|Q9VMS1|Q9VMS1_DROME Cyclope, isoform A OS=Drosophila melanogaster OX=7227 GN=cype PE=1 SV=3	-0.103896		>tr|Q9VKR0|Q9VKR0_DROME ER membrane protein complex subunit 3 OS=Drosophila melanogaster OX=7227 GN=EMC3 PE=1 SV=1	0.0951417
>tr|Q7KUC2|Q7KUC2_DROME FI04467p OS=Drosophila melanogaster OX=7227 GN=Pdxk PE=1 SV=1	-0.105592		>tr|Q9VKR0|Q9VKR0_DROME ER membrane protein complex subunit 3 OS=Drosophila melanogaster OX=7227 GN=EMC3 PE=1 SV=1	0.0951417
>tr|Q7KUC2|Q7KUC2_DROME FI04467p OS=Drosophila melanogaster OX=7227 GN=Pdxk PE=1 SV=1	-0.105592		>sp|P04755|ACH3_DROME Acetylcholine receptor subunit beta-like 1 OS=Drosophila melanogaster OX=7227 GN=nAChRbeta1 PE=2 SV=1	0.090595
>tr|Q7KUC2|Q7KUC2_DROME FI04467p OS=Drosophila melanogaster OX=7227 GN=Pdxk PE=1 SV=1	-0.105592		>sp|P04755|ACH3_DROME Acetylcholine receptor subunit beta-like 1 OS=Drosophila melanogaster OX=7227 GN=nAChRbeta1 PE=2 SV=1	0.090595
>tr|Q9VXQ5|Q9VXQ5_DROME Chaperonin containing TCP1 subunit 6 OS=Drosophila melanogaster OX=7227 GN=CCT6 PE=1 SV=1	-0.106379		>sp|P04755|ACH3_DROME Acetylcholine receptor subunit beta-like 1 OS=Drosophila melanogaster OX=7227 GN=nAChRbeta1 PE=2 SV=1	0.090595
>sp|Q27580|SAHH_DROME Adenosylhomocysteinase OS=Drosophila melanogaster OX=7227 GN=Ahcy PE=1 SV=2	-0.107176		>tr|A0A0B4K790|A0A0B4K790_DROME Na/Ca-exchange protein, isoform E OS=Drosophila melanogaster OX=7227 GN=Calx PE=1 SV=1	0.0905504
>sp|Q27580|SAHH_DROME Adenosylhomocysteinase OS=Drosophila melanogaster OX=7227 GN=Ahcy PE=1 SV=2	-0.107176		>tr|A0A0B4K790|A0A0B4K790_DROME Na/Ca-exchange protein, isoform E OS=Drosophila melanogaster OX=7227 GN=Calx PE=1 SV=1	0.0905504
>sp|Q27580|SAHH_DROME Adenosylhomocysteinase OS=Drosophila melanogaster OX=7227 GN=Ahcy PE=1 SV=2	-0.107176		>tr|A0A0B4K790|A0A0B4K790_DROME Na/Ca-exchange protein, isoform E OS=Drosophila melanogaster OX=7227 GN=Calx PE=1 SV=1	0.0905504
>sp|Q94511|NDUS1_DROME NADH-ubiquinone oxidoreductase 75 kDa subunit, mitochondrial OS=Drosophila melanogaster OX=7227 GN=ND-75 PE=2 SV=3	-0.10725		>sp|Q9VWU1|PSH_DROME Serine protease persephone OS=Drosophila melanogaster OX=7227 GN=psh PE=1 SV=1	0.0890863
>sp|Q94511|NDUS1_DROME NADH-ubiquinone oxidoreductase 75 kDa subunit, mitochondrial OS=Drosophila melanogaster OX=7227 GN=ND-75 PE=2 SV=3	-0.10725		>tr|X2JA11|X2JA11_DROME Uncharacterized protein, isoform B OS=Drosophila melanogaster OX=7227 GN=EG:BACR19J1.2 PE=1 SV=1	0.0881857
>sp|Q94511|NDUS1_DROME NADH-ubiquinone oxidoreductase 75 kDa subunit, mitochondrial OS=Drosophila melanogaster OX=7227 GN=ND-75 PE=2 SV=3	-0.10725		>tr|X2JA11|X2JA11_DROME Uncharacterized protein, isoform B OS=Drosophila melanogaster OX=7227 GN=EG:BACR19J1.2 PE=1 SV=1	0.0881857
>tr|Q9VRS9|Q9VRS9_DROME Jonah 65Ai, isoform A OS=Drosophila melanogaster OX=7227 GN=Jon65Ai PE=2 SV=1	-0.107252		>tr|O97479|O97479_DROME FI05212p OS=Drosophila melanogaster OX=7227 GN=Sodh-1 PE=1 SV=1	0.0877778
>tr|Q7KN85|Q7KN85_DROME ATP-citrate synthase OS=Drosophila melanogaster OX=7227 GN=ATPCL PE=1 SV=1	-0.107644		>tr|O97479|O97479_DROME FI05212p OS=Drosophila melanogaster OX=7227 GN=Sodh-1 PE=1 SV=1	0.0877778
>tr|Q7KN85|Q7KN85_DROME ATP-citrate synthase OS=Drosophila melanogaster OX=7227 GN=ATPCL PE=1 SV=1	-0.107644		>tr|O97479|O97479_DROME FI05212p OS=Drosophila melanogaster OX=7227 GN=Sodh-1 PE=1 SV=1	0.0877778
>tr|Q7KN85|Q7KN85_DROME ATP-citrate synthase OS=Drosophila melanogaster OX=7227 GN=ATPCL PE=1 SV=1	-0.107644		>tr|Q9VHB1|Q9VHB1_DROME Mitochondrial pyruvate carrier OS=Drosophila melanogaster OX=7227 GN=Dmel\CG9399 PE=1 SV=1	0.0863636
>tr|P91632|P91632_DROME Mushroom-body expressed, isoform A OS=Drosophila melanogaster OX=7227 GN=mub PE=1 SV=1	-0.108549		>tr|Q9VHB1|Q9VHB1_DROME Mitochondrial pyruvate carrier OS=Drosophila melanogaster OX=7227 GN=Dmel\CG9399 PE=1 SV=1	0.0863636
>tr|Q7K2S9|Q7K2S9_DROME AT30376p OS=Drosophila melanogaster OX=7227 GN=loopin-1 PE=1 SV=1	-0.108555		>tr|Q9VHB1|Q9VHB1_DROME Mitochondrial pyruvate carrier OS=Drosophila melanogaster OX=7227 GN=Dmel\CG9399 PE=1 SV=1	0.0863636
>tr|Q7K2S9|Q7K2S9_DROME AT30376p OS=Drosophila melanogaster OX=7227 GN=loopin-1 PE=1 SV=1	-0.108555		>tr|A0A0B4LEY7|A0A0B4LEY7_DROME Uncharacterized protein, isoform C OS=Drosophila melanogaster OX=7227 GN=Dmel\CG13743 PE=4 SV=1	0.0860465
>tr|Q7K2S9|Q7K2S9_DROME AT30376p OS=Drosophila melanogaster OX=7227 GN=loopin-1 PE=1 SV=1	-0.108555		>tr|Q0KHY8|Q0KHY8_DROME Uncharacterized protein, isoform B OS=Drosophila melanogaster OX=7227 GN=CG2176 PE=1 SV=1	0.0858156
>tr|Q9VXH7|Q9VXH7_DROME FI17510p1 OS=Drosophila melanogaster OX=7227 GN=Dmel\CG9917 PE=1 SV=1	-0.108638		>tr|Q0KHY8|Q0KHY8_DROME Uncharacterized protein, isoform B OS=Drosophila melanogaster OX=7227 GN=CG2176 PE=1 SV=1	0.0858156
>tr|Q9V3I0|Q9V3I0_DROME EG:BACR42I17.2 protein OS=Drosophila melanogaster OX=7227 GN=EG:BACR42I17.2 PE=2 SV=1	-0.108654		>tr|Q0KHY8|Q0KHY8_DROME Uncharacterized protein, isoform B OS=Drosophila melanogaster OX=7227 GN=CG2176 PE=1 SV=1	0.0858156
>tr|Q9VHN7|Q9VHN7_DROME LP07963p OS=Drosophila melanogaster OX=7227 GN=anon-WO0118547.344 PE=1 SV=3	-0.108786		>tr|Q7KE33|Q7KE33_DROME Odorant binding protein c OS=Drosophila melanogaster OX=7227 GN=Obp51a PE=2 SV=1	0.0846154
>tr|Q9VHN7|Q9VHN7_DROME LP07963p OS=Drosophila melanogaster OX=7227 GN=anon-WO0118547.344 PE=1 SV=3	-0.108786		>tr|Q7KE33|Q7KE33_DROME Odorant binding protein c OS=Drosophila melanogaster OX=7227 GN=Obp51a PE=2 SV=1	0.0846154
>tr|Q9VHN7|Q9VHN7_DROME LP07963p OS=Drosophila melanogaster OX=7227 GN=anon-WO0118547.344 PE=1 SV=3	-0.108786		>tr|Q7KE33|Q7KE33_DROME Odorant binding protein c OS=Drosophila melanogaster OX=7227 GN=Obp51a PE=2 SV=1	0.0846154
>tr|O96692|O96692_DROME RE63021p OS=Drosophila melanogaster OX=7227 GN=Rap2l PE=1 SV=1	-0.108791		>tr|Q9VE80|Q9VE80_DROME Uncharacterized protein, isoform B OS=Drosophila melanogaster OX=7227 GN=Dmel\CG7675 PE=1 SV=2	0.0833333
>tr|Q9VCV4|Q9VCV4_DROME Iron regulatory protein 1A OS=Drosophila melanogaster OX=7227 GN=Irp-1A PE=1 SV=1	-0.108869		>tr|Q9VE80|Q9VE80_DROME Uncharacterized protein, isoform B OS=Drosophila melanogaster OX=7227 GN=Dmel\CG7675 PE=1 SV=2	0.0833333
>tr|Q9VCV4|Q9VCV4_DROME Iron regulatory protein 1A OS=Drosophila melanogaster OX=7227 GN=Irp-1A PE=1 SV=1	-0.108869		>tr|Q9VE80|Q9VE80_DROME Uncharacterized protein, isoform B OS=Drosophila melanogaster OX=7227 GN=Dmel\CG7675 PE=1 SV=2	0.0833333
>tr|Q9VB96|Q9VB96_DROME Uncharacterized protein, isoform A OS=Drosophila melanogaster OX=7227 GN=Dmel\CG31075 PE=1 SV=2	-0.109897		>tr|Q9W228|Q9W228_DROME RE07815p OS=Drosophila melanogaster OX=7227 GN=Ugt317A1 PE=1 SV=3	0.0824197
>tr|Q9VB96|Q9VB96_DROME Uncharacterized protein, isoform A OS=Drosophila melanogaster OX=7227 GN=Dmel\CG31075 PE=1 SV=2	-0.109897		>sp|Q9VVW3|SFXN2_DROME Sideroflexin-2 OS=Drosophila melanogaster OX=7227 GN=Sfxn2 PE=2 SV=2	0.0819572
>tr|Q9VB96|Q9VB96_DROME Uncharacterized protein, isoform A OS=Drosophila melanogaster OX=7227 GN=Dmel\CG31075 PE=1 SV=2	-0.109897		>sp|Q9VVW3|SFXN2_DROME Sideroflexin-2 OS=Drosophila melanogaster OX=7227 GN=Sfxn2 PE=2 SV=2	0.0819572
>tr|Q9VRD6|Q9VRD6_DROME GEO05124p1 OS=Drosophila melanogaster OX=7227 GN=Ntf-2 PE=1 SV=1	-0.111538		>sp|Q9VVW3|SFXN2_DROME Sideroflexin-2 OS=Drosophila melanogaster OX=7227 GN=Sfxn2 PE=2 SV=2	0.0819572
>tr|Q9VRD6|Q9VRD6_DROME GEO05124p1 OS=Drosophila melanogaster OX=7227 GN=Ntf-2 PE=1 SV=1	-0.111538		>tr|Q9Y166|Q9Y166_DROME BcDNA.GH02431 OS=Drosophila melanogaster OX=7227 GN=Dic1 PE=1 SV=1	0.0814286
>tr|Q9VRD6|Q9VRD6_DROME GEO05124p1 OS=Drosophila melanogaster OX=7227 GN=Ntf-2 PE=1 SV=1	-0.111538		>tr|Q9Y166|Q9Y166_DROME BcDNA.GH02431 OS=Drosophila melanogaster OX=7227 GN=Dic1 PE=1 SV=1	0.0814286
>tr|Q9V3Q4|Q9V3Q4_DROME GH25379p OS=Drosophila melanogaster OX=7227 GN=Jafrac2 PE=1 SV=1	-0.112397		>tr|Q9Y166|Q9Y166_DROME BcDNA.GH02431 OS=Drosophila melanogaster OX=7227 GN=Dic1 PE=1 SV=1	0.0814286
>tr|Q9V3Q4|Q9V3Q4_DROME GH25379p OS=Drosophila melanogaster OX=7227 GN=Jafrac2 PE=1 SV=1	-0.112397		>tr|Q9VK69|Q9VK69_DROME T-complex protein 1 subunit delta OS=Drosophila melanogaster OX=7227 GN=CCT4 PE=1 SV=1	0.0804878
>tr|Q9V3Q4|Q9V3Q4_DROME GH25379p OS=Drosophila melanogaster OX=7227 GN=Jafrac2 PE=1 SV=1	-0.112397		>tr|Q9VK69|Q9VK69_DROME T-complex protein 1 subunit delta OS=Drosophila melanogaster OX=7227 GN=CCT4 PE=1 SV=1	0.0804878
>tr|Q9VMH2|Q9VMH2_DROME Actin-related protein 2/3 complex subunit 4 OS=Drosophila melanogaster OX=7227 GN=Arpc4 PE=1 SV=1	-0.1125		>tr|Q9VK69|Q9VK69_DROME T-complex protein 1 subunit delta OS=Drosophila melanogaster OX=7227 GN=CCT4 PE=1 SV=1	0.0804878
>tr|Q0KIE7|Q0KIE7_DROME Ankyrin, isoform B OS=Drosophila melanogaster OX=7227 GN=Ank PE=1 SV=1	-0.113041		>tr|Q8SYC5|Q8SYC5_DROME RE68347p OS=Drosophila melanogaster OX=7227 GN=Dmel\CG14253 PE=2 SV=1	0.0786967
>tr|Q9VM14|Q9VM14_DROME AT21758p OS=Drosophila melanogaster OX=7227 GN=muc PE=1 SV=1	-0.114258		>tr|Q9VG86|Q9VG86_DROME Fatty acyl-CoA reductase OS=Drosophila melanogaster OX=7227 GN=anon-WO0140519.58 PE=1 SV=3	0.0786427
>sp|O02649|CH60A_DROME Heat shock protein 60A OS=Drosophila melanogaster OX=7227 GN=Hsp60A PE=1 SV=3	-0.115183		>tr|Q9VG86|Q9VG86_DROME Fatty acyl-CoA reductase OS=Drosophila melanogaster OX=7227 GN=anon-WO0140519.58 PE=1 SV=3	0.0786427
>sp|O02649|CH60A_DROME Heat shock protein 60A OS=Drosophila melanogaster OX=7227 GN=Hsp60A PE=1 SV=3	-0.115183		>tr|Q9VG86|Q9VG86_DROME Fatty acyl-CoA reductase OS=Drosophila melanogaster OX=7227 GN=anon-WO0140519.58 PE=1 SV=3	0.0786427
>sp|O02649|CH60A_DROME Heat shock protein 60A OS=Drosophila melanogaster OX=7227 GN=Hsp60A PE=1 SV=3	-0.115183		>tr|Q9VM58|Q9VM58_DROME 3-Hydroxymethyl-3-methylglutaryl-CoA lyase, isoform A OS=Drosophila melanogaster OX=7227 GN=Hmgcl PE=1 SV=2	0.0786378
>tr|Q9VBP6|Q9VBP6_DROME Succinate-semialdehyde dehydrogenase OS=Drosophila melanogaster OX=7227 GN=Ssadh PE=1 SV=1	-0.115324		>tr|Q9VM58|Q9VM58_DROME 3-Hydroxymethyl-3-methylglutaryl-CoA lyase, isoform A OS=Drosophila melanogaster OX=7227 GN=Hmgcl PE=1 SV=2	0.0786378
>tr|Q9VBP6|Q9VBP6_DROME Succinate-semialdehyde dehydrogenase OS=Drosophila melanogaster OX=7227 GN=Ssadh PE=1 SV=1	-0.115324		>tr|Q9V9R3|Q9V9R3_DROME Adenylate cyclase OS=Drosophila melanogaster OX=7227 GN=Ac3 PE=3 SV=1	0.0785775
>tr|Q9VBP6|Q9VBP6_DROME Succinate-semialdehyde dehydrogenase OS=Drosophila melanogaster OX=7227 GN=Ssadh PE=1 SV=1	-0.115324		>tr|Q9VK99|Q9VK99_DROME Atilla, isoform B OS=Drosophila melanogaster OX=7227 GN=atilla PE=4 SV=3	0.0776224
>tr|Q9VL44|Q9VL44_DROME MIP05602p OS=Drosophila melanogaster OX=7227 GN=Spn31A PE=2 SV=1	-0.115445		>tr|Q9VK99|Q9VK99_DROME Atilla, isoform B OS=Drosophila melanogaster OX=7227 GN=atilla PE=4 SV=3	0.0776224
>sp|Q9VJI9|NUBP1_DROME Cytosolic Fe-S cluster assembly factor NUBP1 homolog OS=Drosophila melanogaster OX=7227 GN=CG17904 PE=1 SV=1	-0.115756		>tr|Q9VK56|Q9VK56_DROME Multidrug-Resistance like protein 1, isoform A OS=Drosophila melanogaster OX=7227 GN=MRP PE=1 SV=4	0.0773402
>sp|Q9VJI9|NUBP1_DROME Cytosolic Fe-S cluster assembly factor NUBP1 homolog OS=Drosophila melanogaster OX=7227 GN=CG17904 PE=1 SV=1	-0.115756		>tr|Q9VK56|Q9VK56_DROME Multidrug-Resistance like protein 1, isoform A OS=Drosophila melanogaster OX=7227 GN=MRP PE=1 SV=4	0.0773402
>sp|P61851|SODC_DROME Superoxide dismutase [Cu-Zn] OS=Drosophila melanogaster OX=7227 GN=Sod1 PE=1 SV=2	-0.11634		>tr|Q8SXR1|Q8SXR1_DROME Neural lazarillo, isoform A OS=Drosophila melanogaster OX=7227 GN=NLaz PE=1 SV=1	0.0767857
>sp|P61851|SODC_DROME Superoxide dismutase [Cu-Zn] OS=Drosophila melanogaster OX=7227 GN=Sod1 PE=1 SV=2	-0.11634		>tr|Q8SXR1|Q8SXR1_DROME Neural lazarillo, isoform A OS=Drosophila melanogaster OX=7227 GN=NLaz PE=1 SV=1	0.0767857
>sp|P61851|SODC_DROME Superoxide dismutase [Cu-Zn] OS=Drosophila melanogaster OX=7227 GN=Sod1 PE=1 SV=2	-0.11634		>tr|Q8SXR1|Q8SXR1_DROME Neural lazarillo, isoform A OS=Drosophila melanogaster OX=7227 GN=NLaz PE=1 SV=1	0.0767857
>tr|Q9VQL6|Q9VQL6_DROME Fatty acid synthase 2, isoform A OS=Drosophila melanogaster OX=7227 GN=FASN2 PE=1 SV=1	-0.116397		>tr|E1JHB4|E1JHB4_DROME Piezo-type mechanosensitive ion channel component OS=Drosophila melanogaster OX=7227 GN=Piezo PE=1 SV=1	0.0763217
>tr|Q9W1H9|Q9W1H9_DROME SD18780p OS=Drosophila melanogaster OX=7227 GN=Dmel\CG5569 PE=2 SV=1	-0.116837		>tr|M9PJ56|M9PJ56_DROME Otopetrin-like a, isoform E OS=Drosophila melanogaster OX=7227 GN=OtopLa PE=1 SV=1	0.0730337
>sp|Q9VPS5|CH60B_DROME 60 kDa heat shock protein homolog 1, mitochondrial OS=Drosophila melanogaster OX=7227 GN=Hsp60B PE=2 SV=1	-0.118056		>tr|M9PJ56|M9PJ56_DROME Otopetrin-like a, isoform E OS=Drosophila melanogaster OX=7227 GN=OtopLa PE=1 SV=1	0.0730337
>sp|Q9VPS5|CH60B_DROME 60 kDa heat shock protein homolog 1, mitochondrial OS=Drosophila melanogaster OX=7227 GN=Hsp60B PE=2 SV=1	-0.118056		>tr|M9PJ56|M9PJ56_DROME Otopetrin-like a, isoform E OS=Drosophila melanogaster OX=7227 GN=OtopLa PE=1 SV=1	0.0730337
>tr|Q9VNW6|Q9VNW6_DROME Delta-1-pyrroline-5-carboxylate synthase OS=Drosophila melanogaster OX=7227 GN=Dmel\CG7470 PE=1 SV=1	-0.118299		>tr|A0A0B4KEZ8|A0A0B4KEZ8_DROME Painless, isoform B OS=Drosophila melanogaster OX=7227 GN=pain PE=3 SV=1	0.0720191
>tr|Q9VNW6|Q9VNW6_DROME Delta-1-pyrroline-5-carboxylate synthase OS=Drosophila melanogaster OX=7227 GN=Dmel\CG7470 PE=1 SV=1	-0.118299		>tr|A0A0B4KEZ8|A0A0B4KEZ8_DROME Painless, isoform B OS=Drosophila melanogaster OX=7227 GN=pain PE=3 SV=1	0.0720191
>tr|Q9VNW6|Q9VNW6_DROME Delta-1-pyrroline-5-carboxylate synthase OS=Drosophila melanogaster OX=7227 GN=Dmel\CG7470 PE=1 SV=1	-0.118299		>tr|Q9VSU6|Q9VSU6_DROME Dihydropteridine reductase OS=Drosophila melanogaster OX=7227 GN=Dhpr PE=1 SV=1	0.0702128
>tr|Q967S0|Q967S0_DROME Amidophosphoribosyltransferase OS=Drosophila melanogaster OX=7227 GN=Prat2 PE=2 SV=1	-0.11883		>tr|Q9VSU6|Q9VSU6_DROME Dihydropteridine reductase OS=Drosophila melanogaster OX=7227 GN=Dhpr PE=1 SV=1	0.0702128
>tr|Q967S0|Q967S0_DROME Amidophosphoribosyltransferase OS=Drosophila melanogaster OX=7227 GN=Prat2 PE=2 SV=1	-0.11883		>tr|Q9VSU6|Q9VSU6_DROME Dihydropteridine reductase OS=Drosophila melanogaster OX=7227 GN=Dhpr PE=1 SV=1	0.0702128
>tr|Q967S0|Q967S0_DROME Amidophosphoribosyltransferase OS=Drosophila melanogaster OX=7227 GN=Prat2 PE=2 SV=1	-0.11883		>sp|P12613|TCPA_DROME T-complex protein 1 subunit alpha OS=Drosophila melanogaster OX=7227 GN=CCT1 PE=2 SV=2	0.0698384
>tr|Q9VHK7|Q9VHK7_DROME GEO07179p1 OS=Drosophila melanogaster OX=7227 GN=anon-EST:Posey161 PE=1 SV=1	-0.119149		>sp|P12613|TCPA_DROME T-complex protein 1 subunit alpha OS=Drosophila melanogaster OX=7227 GN=CCT1 PE=2 SV=2	0.0698384
>tr|Q9VB10|Q9VB10_DROME GH01709p OS=Drosophila melanogaster OX=7227 GN=Dmel\CG5590 PE=1 SV=1	-0.119417		>sp|P12613|TCPA_DROME T-complex protein 1 subunit alpha OS=Drosophila melanogaster OX=7227 GN=CCT1 PE=2 SV=2	0.0698384
>tr|A4V0U4|A4V0U4_DROME Leukotriene A(4) hydrolase OS=Drosophila melanogaster OX=7227 GN=Dmel\CG10602 PE=1 SV=1	-0.12186		>tr|A0A0B4LGB7|A0A0B4LGB7_DROME Calcium-transporting ATPase OS=Drosophila melanogaster OX=7227 GN=SERCA PE=1 SV=1	0.0691692
>tr|A4V0U4|A4V0U4_DROME Leukotriene A(4) hydrolase OS=Drosophila melanogaster OX=7227 GN=Dmel\CG10602 PE=1 SV=1	-0.12186		>tr|A0A0B4LGB7|A0A0B4LGB7_DROME Calcium-transporting ATPase OS=Drosophila melanogaster OX=7227 GN=SERCA PE=1 SV=1	0.0691692
>tr|A4V0U4|A4V0U4_DROME Leukotriene A(4) hydrolase OS=Drosophila melanogaster OX=7227 GN=Dmel\CG10602 PE=1 SV=1	-0.12186		>tr|A0A0B4LGB7|A0A0B4LGB7_DROME Calcium-transporting ATPase OS=Drosophila melanogaster OX=7227 GN=SERCA PE=1 SV=1	0.0691692
>tr|A1Z6N5|A1Z6N5_DROME FI13301p OS=Drosophila melanogaster OX=7227 GN=Dmel\CG3270 PE=1 SV=1	-0.122273		>tr|Q9VA76|Q9VA76_DROME IP18706p OS=Drosophila melanogaster OX=7227 GN=crhbp PE=2 SV=2	0.0679887
>tr|A1Z6N5|A1Z6N5_DROME FI13301p OS=Drosophila melanogaster OX=7227 GN=Dmel\CG3270 PE=1 SV=1	-0.122273		>tr|Q8MLQ5|Q8MLQ5_DROME Kazachoc, isoform D OS=Drosophila melanogaster OX=7227 GN=kcc PE=1 SV=1	0.0679702
>tr|A1Z6N5|A1Z6N5_DROME FI13301p OS=Drosophila melanogaster OX=7227 GN=Dmel\CG3270 PE=1 SV=1	-0.122273		>tr|Q8MLQ5|Q8MLQ5_DROME Kazachoc, isoform D OS=Drosophila melanogaster OX=7227 GN=kcc PE=1 SV=1	0.0679702
>tr|Q9VFV1|Q9VFV1_DROME RE55542p OS=Drosophila melanogaster OX=7227 GN=yellow-e PE=2 SV=1	-0.122453		>tr|Q8MLQ5|Q8MLQ5_DROME Kazachoc, isoform D OS=Drosophila melanogaster OX=7227 GN=kcc PE=1 SV=1	0.0679702
>tr|Q9VFV1|Q9VFV1_DROME RE55542p OS=Drosophila melanogaster OX=7227 GN=yellow-e PE=2 SV=1	-0.122453		>sp|Q24439|ATPO_DROME ATP synthase subunit O, mitochondrial OS=Drosophila melanogaster OX=7227 GN=ATPsynO PE=2 SV=2	0.0617225
>sp|P25007|PPIA_DROME Peptidyl-prolyl cis-trans isomerase OS=Drosophila melanogaster OX=7227 GN=Cyp1 PE=1 SV=2	-0.122467		>sp|Q24439|ATPO_DROME ATP synthase subunit O, mitochondrial OS=Drosophila melanogaster OX=7227 GN=ATPsynO PE=2 SV=2	0.0617225
>sp|P25007|PPIA_DROME Peptidyl-prolyl cis-trans isomerase OS=Drosophila melanogaster OX=7227 GN=Cyp1 PE=1 SV=2	-0.122467		>sp|Q24439|ATPO_DROME ATP synthase subunit O, mitochondrial OS=Drosophila melanogaster OX=7227 GN=ATPsynO PE=2 SV=2	0.0617225
>sp|P25007|PPIA_DROME Peptidyl-prolyl cis-trans isomerase OS=Drosophila melanogaster OX=7227 GN=Cyp1 PE=1 SV=2	-0.122467		>sp|P46415|ADHX_DROME Alcohol dehydrogenase class-3 OS=Drosophila melanogaster OX=7227 GN=Fdh PE=1 SV=3	0.0614776
>sp|P91938|TRXR1_DROME Thioredoxin reductase 1, mitochondrial OS=Drosophila melanogaster OX=7227 GN=Trxr-1 PE=1 SV=2	-0.122651		>sp|P46415|ADHX_DROME Alcohol dehydrogenase class-3 OS=Drosophila melanogaster OX=7227 GN=Fdh PE=1 SV=3	0.0614776
>sp|P91938|TRXR1_DROME Thioredoxin reductase 1, mitochondrial OS=Drosophila melanogaster OX=7227 GN=Trxr-1 PE=1 SV=2	-0.122651		>sp|P46415|ADHX_DROME Alcohol dehydrogenase class-3 OS=Drosophila melanogaster OX=7227 GN=Fdh PE=1 SV=3	0.0614776
>sp|P91938|TRXR1_DROME Thioredoxin reductase 1, mitochondrial OS=Drosophila melanogaster OX=7227 GN=Trxr-1 PE=1 SV=2	-0.122651		>tr|Q9VDC0|Q9VDC0_DROME GH01837p OS=Drosophila melanogaster OX=7227 GN=FOHSDR PE=1 SV=1	0.0608
>tr|Q9VI64|Q9VI64_DROME LD30995p OS=Drosophila melanogaster OX=7227 GN=Dmel\CG10098 PE=1 SV=1	-0.123229		>tr|Q9VDC0|Q9VDC0_DROME GH01837p OS=Drosophila melanogaster OX=7227 GN=FOHSDR PE=1 SV=1	0.0608
>tr|Q9VI64|Q9VI64_DROME LD30995p OS=Drosophila melanogaster OX=7227 GN=Dmel\CG10098 PE=1 SV=1	-0.123229		>tr|Q9VDC0|Q9VDC0_DROME GH01837p OS=Drosophila melanogaster OX=7227 GN=FOHSDR PE=1 SV=1	0.0608
>tr|Q9VI64|Q9VI64_DROME LD30995p OS=Drosophila melanogaster OX=7227 GN=Dmel\CG10098 PE=1 SV=1	-0.123229		>tr|Q9VJ21|Q9VJ21_DROME Uncharacterized protein, isoform B OS=Drosophila melanogaster OX=7227 GN=CG17338 PE=4 SV=4	0.0584278
>tr|Q9W0H2|Q9W0H2_DROME HECT and RLD domain containing E3 ubiquitin ligase 4, isoform A OS=Drosophila melanogaster OX=7227 GN=Herc4 PE=1 SV=2	-0.123535		>sp|Q9VP65|TR112_DROME Multifunctional methyltransferase subunit TRM112-like protein OS=Drosophila melanogaster OX=7227 GN=CG12975 PE=2 SV=1	0.0572581
>sp|Q95083|PSA5_DROME Proteasome subunit alpha type-5 OS=Drosophila melanogaster OX=7227 GN=Prosalpha5 PE=2 SV=2	-0.12377		>sp|Q9VP65|TR112_DROME Multifunctional methyltransferase subunit TRM112-like protein OS=Drosophila melanogaster OX=7227 GN=CG12975 PE=2 SV=1	0.0572581
>sp|Q95083|PSA5_DROME Proteasome subunit alpha type-5 OS=Drosophila melanogaster OX=7227 GN=Prosalpha5 PE=2 SV=2	-0.12377		>sp|Q00748|MDR65_DROME Multidrug resistance protein homolog 65 OS=Drosophila melanogaster OX=7227 GN=Mdr65 PE=1 SV=2	0.0567588
>sp|Q95083|PSA5_DROME Proteasome subunit alpha type-5 OS=Drosophila melanogaster OX=7227 GN=Prosalpha5 PE=2 SV=2	-0.12377		>sp|Q00748|MDR65_DROME Multidrug resistance protein homolog 65 OS=Drosophila melanogaster OX=7227 GN=Mdr65 PE=1 SV=2	0.0567588
>sp|O01666|ATPG_DROME ATP synthase subunit gamma, mitochondrial OS=Drosophila melanogaster OX=7227 GN=ATPsyngamma PE=2 SV=2	-0.123906		>tr|Q7K110|Q7K110_DROME Dolichyl-diphosphooligosaccharide--protein glycosyltransferase subunit 2 OS=Drosophila melanogaster OX=7227 GN=OstDelta PE=1 SV=1	0.0559937
>sp|O01666|ATPG_DROME ATP synthase subunit gamma, mitochondrial OS=Drosophila melanogaster OX=7227 GN=ATPsyngamma PE=2 SV=2	-0.123906		>tr|Q7K110|Q7K110_DROME Dolichyl-diphosphooligosaccharide--protein glycosyltransferase subunit 2 OS=Drosophila melanogaster OX=7227 GN=OstDelta PE=1 SV=1	0.0559937
>sp|O01666|ATPG_DROME ATP synthase subunit gamma, mitochondrial OS=Drosophila melanogaster OX=7227 GN=ATPsyngamma PE=2 SV=2	-0.123906		>tr|Q7K110|Q7K110_DROME Dolichyl-diphosphooligosaccharide--protein glycosyltransferase subunit 2 OS=Drosophila melanogaster OX=7227 GN=OstDelta PE=1 SV=1	0.0559937
>sp|C0HKF7|SER1_DROME Serine protease 1 OS=Drosophila melanogaster OX=7227 GN=Jon99Cii PE=2 SV=1	-0.124151		>tr|Q9VU35|Q9VU35_DROME RH34413p OS=Drosophila melanogaster OX=7227 GN=Dmel\CG11267 PE=1 SV=1	0.0543689
>sp|C0HKF7|SER1_DROME Serine protease 1 OS=Drosophila melanogaster OX=7227 GN=Jon99Cii PE=2 SV=1	-0.124151		>tr|Q9VU35|Q9VU35_DROME RH34413p OS=Drosophila melanogaster OX=7227 GN=Dmel\CG11267 PE=1 SV=1	0.0543689
>tr|Q7JVZ8|Q7JVZ8_DROME Glutathione S transferase E11, isoform A OS=Drosophila melanogaster OX=7227 GN=GstE11 PE=1 SV=1	-0.124889		>tr|Q8SWX6|Q8SWX6_DROME GH08893p OS=Drosophila melanogaster OX=7227 GN=Dmel\CG11790 PE=1 SV=1	0.0543046
>tr|Q7JVZ8|Q7JVZ8_DROME Glutathione S transferase E11, isoform A OS=Drosophila melanogaster OX=7227 GN=GstE11 PE=1 SV=1	-0.124889		>tr|Q9VK11|Q9VK11_DROME GH15921p OS=Drosophila melanogaster OX=7227 GN=cg16820 PE=2 SV=2	0.0540453
>tr|Q7JVZ8|Q7JVZ8_DROME Glutathione S transferase E11, isoform A OS=Drosophila melanogaster OX=7227 GN=GstE11 PE=1 SV=1	-0.124889		>tr|Q9VK11|Q9VK11_DROME GH15921p OS=Drosophila melanogaster OX=7227 GN=cg16820 PE=2 SV=2	0.0540453
>sp|O76879|CCCP_DROME Circadian clock-controlled protein OS=Drosophila melanogaster OX=7227 GN=anon-3B1.2 PE=2 SV=2	-0.125385		>tr|Q9VK11|Q9VK11_DROME GH15921p OS=Drosophila melanogaster OX=7227 GN=cg16820 PE=2 SV=2	0.0540453
>sp|O76879|CCCP_DROME Circadian clock-controlled protein OS=Drosophila melanogaster OX=7227 GN=anon-3B1.2 PE=2 SV=2	-0.125385		>tr|Q9VKX2|Q9VKX2_DROME Malate dehydrogenase OS=Drosophila melanogaster OX=7227 GN=Mdh1 PE=1 SV=2	0.0540059
>tr|Q9VG79|Q9VG79_DROME Dipeptidase C, isoform A OS=Drosophila melanogaster OX=7227 GN=Dip-C PE=1 SV=2	-0.126477		>tr|Q9VKX2|Q9VKX2_DROME Malate dehydrogenase OS=Drosophila melanogaster OX=7227 GN=Mdh1 PE=1 SV=2	0.0540059
>tr|Q9VG79|Q9VG79_DROME Dipeptidase C, isoform A OS=Drosophila melanogaster OX=7227 GN=Dip-C PE=1 SV=2	-0.126477		>tr|Q9VKX2|Q9VKX2_DROME Malate dehydrogenase OS=Drosophila melanogaster OX=7227 GN=Mdh1 PE=1 SV=2	0.0540059
>tr|Q9VKY3|Q9VKY3_DROME ATP-dependent Clp protease proteolytic subunit OS=Drosophila melanogaster OX=7227 GN=ClpP PE=1 SV=1	-0.127273		>sp|P15425|CYPR_DROME Peptidyl-prolyl cis-trans isomerase, rhodopsin-specific isozyme OS=Drosophila melanogaster OX=7227 GN=ninaA PE=1 SV=1	0.0531646
>tr|Q9VKY3|Q9VKY3_DROME ATP-dependent Clp protease proteolytic subunit OS=Drosophila melanogaster OX=7227 GN=ClpP PE=1 SV=1	-0.127273		>sp|P15425|CYPR_DROME Peptidyl-prolyl cis-trans isomerase, rhodopsin-specific isozyme OS=Drosophila melanogaster OX=7227 GN=ninaA PE=1 SV=1	0.0531646
>sp|Q9V6U9|MECR_DROME Enoyl-[acyl-carrier-protein] reductase, mitochondrial OS=Drosophila melanogaster OX=7227 GN=CG16935 PE=3 SV=2	-0.127451		>sp|Q9W3C7|PPT1_DROME Palmitoyl-protein thioesterase 1 OS=Drosophila melanogaster OX=7227 GN=Ppt1 PE=2 SV=2	0.0528662
>sp|Q9V6U9|MECR_DROME Enoyl-[acyl-carrier-protein] reductase, mitochondrial OS=Drosophila melanogaster OX=7227 GN=CG16935 PE=3 SV=2	-0.127451		>sp|Q9W3C7|PPT1_DROME Palmitoyl-protein thioesterase 1 OS=Drosophila melanogaster OX=7227 GN=Ppt1 PE=2 SV=2	0.0528662
>sp|Q9V6U9|MECR_DROME Enoyl-[acyl-carrier-protein] reductase, mitochondrial OS=Drosophila melanogaster OX=7227 GN=CG16935 PE=3 SV=2	-0.127451		>sp|Q9W3C7|PPT1_DROME Palmitoyl-protein thioesterase 1 OS=Drosophila melanogaster OX=7227 GN=Ppt1 PE=2 SV=2	0.0528662
>tr|Q9W330|Q9W330_DROME Phosphotransferase OS=Drosophila melanogaster OX=7227 GN=Hex-A PE=1 SV=1	-0.127726		>sp|Q26365|ADT_DROME ADP,ATP carrier protein OS=Drosophila melanogaster OX=7227 GN=sesB PE=2 SV=4	0.050641
>tr|Q9W330|Q9W330_DROME Phosphotransferase OS=Drosophila melanogaster OX=7227 GN=Hex-A PE=1 SV=1	-0.127726		>sp|Q26365|ADT_DROME ADP,ATP carrier protein OS=Drosophila melanogaster OX=7227 GN=sesB PE=2 SV=4	0.050641
>tr|Q7PLP4|Q7PLP4_DROME Uncharacterized protein, isoform B OS=Drosophila melanogaster OX=7227 GN=Dmel\CG41099 PE=1 SV=1	-0.127813		>sp|Q26365|ADT_DROME ADP,ATP carrier protein OS=Drosophila melanogaster OX=7227 GN=sesB PE=2 SV=4	0.050641
>tr|Q7PLP4|Q7PLP4_DROME Uncharacterized protein, isoform B OS=Drosophila melanogaster OX=7227 GN=Dmel\CG41099 PE=1 SV=1	-0.127813		>tr|Q95U54|Q95U54_DROME GH06271p OS=Drosophila melanogaster OX=7227 GN=Mms19 PE=1 SV=1	0.0505735
>sp|P10351|XDH_DROME Xanthine dehydrogenase OS=Drosophila melanogaster OX=7227 GN=ry PE=2 SV=2	-0.128015		>tr|Q95U54|Q95U54_DROME GH06271p OS=Drosophila melanogaster OX=7227 GN=Mms19 PE=1 SV=1	0.0505735
>tr|Q9VGZ3|Q9VGZ3_DROME Iron regulatory protein 1B OS=Drosophila melanogaster OX=7227 GN=Irp-1B PE=1 SV=1	-0.128476		>tr|Q9W3K9|Q9W3K9_DROME FI02989p OS=Drosophila melanogaster OX=7227 GN=Ldsdh1 PE=1 SV=1	0.0496875
>tr|Q9VGZ3|Q9VGZ3_DROME Iron regulatory protein 1B OS=Drosophila melanogaster OX=7227 GN=Irp-1B PE=1 SV=1	-0.128476		>tr|Q9W3K9|Q9W3K9_DROME FI02989p OS=Drosophila melanogaster OX=7227 GN=Ldsdh1 PE=1 SV=1	0.0496875
>tr|Q9VGZ3|Q9VGZ3_DROME Iron regulatory protein 1B OS=Drosophila melanogaster OX=7227 GN=Irp-1B PE=1 SV=1	-0.128476		>tr|Q9W3K9|Q9W3K9_DROME FI02989p OS=Drosophila melanogaster OX=7227 GN=Ldsdh1 PE=1 SV=1	0.0496875
>tr|Q9W0M4|Q9W0M4_DROME LP10861p OS=Drosophila melanogaster OX=7227 GN=Dmel\CG13887 PE=1 SV=1	-0.128509		>tr|X2JAE9|X2JAE9_DROME Uncharacterized protein, isoform C OS=Drosophila melanogaster OX=7227 GN=CG10441 PE=4 SV=1	0.0495466
>tr|Q9VPY2|Q9VPY2_DROME Phospholipase A2 activator protein, isoform A OS=Drosophila melanogaster OX=7227 GN=Plap PE=1 SV=1	-0.12859		>tr|X2JAE9|X2JAE9_DROME Uncharacterized protein, isoform C OS=Drosophila melanogaster OX=7227 GN=CG10441 PE=4 SV=1	0.0495466
>tr|Q9VPY2|Q9VPY2_DROME Phospholipase A2 activator protein, isoform A OS=Drosophila melanogaster OX=7227 GN=Plap PE=1 SV=1	-0.12859		>tr|Q9VA42|Q9VA42_DROME Niemann-Pick type C-2g, isoform A OS=Drosophila melanogaster OX=7227 GN=Npc2g PE=1 SV=1	0.0490566
>sp|Q7JWD3|ASNA_DROME ATPase ASNA1 homolog OS=Drosophila melanogaster OX=7227 GN=CG1598 PE=2 SV=1	-0.128869		>tr|Q9VA42|Q9VA42_DROME Niemann-Pick type C-2g, isoform A OS=Drosophila melanogaster OX=7227 GN=Npc2g PE=1 SV=1	0.0490566
>tr|Q9VVU1|Q9VVU1_DROME FI09602p OS=Drosophila melanogaster OX=7227 GN=GH07925p PE=1 SV=1	-0.128986		>tr|Q9VA42|Q9VA42_DROME Niemann-Pick type C-2g, isoform A OS=Drosophila melanogaster OX=7227 GN=Npc2g PE=1 SV=1	0.0490566
>tr|Q9VVU1|Q9VVU1_DROME FI09602p OS=Drosophila melanogaster OX=7227 GN=GH07925p PE=1 SV=1	-0.128986		>tr|Q7KNR7|Q7KNR7_DROME Photoreceptor dehydrogenase, isoform C OS=Drosophila melanogaster OX=7227 GN=Pdh PE=1 SV=1	0.0490421
>tr|Q9VVU1|Q9VVU1_DROME FI09602p OS=Drosophila melanogaster OX=7227 GN=GH07925p PE=1 SV=1	-0.128986		>tr|Q7KNR7|Q7KNR7_DROME Photoreceptor dehydrogenase, isoform C OS=Drosophila melanogaster OX=7227 GN=Pdh PE=1 SV=1	0.0490421
>tr|Q9VJ31|Q9VJ31_DROME CG10623 protein OS=Drosophila melanogaster OX=7227 GN=Dmel\CG10623 PE=1 SV=1	-0.130514		>tr|Q7KNR7|Q7KNR7_DROME Photoreceptor dehydrogenase, isoform C OS=Drosophila melanogaster OX=7227 GN=Pdh PE=1 SV=1	0.0490421
>tr|Q9VJI5|Q9VJI5_DROME LD43175p OS=Drosophila melanogaster OX=7227 GN=yellow-b PE=2 SV=1	-0.130905		>sp|Q01604|PGK_DROME Phosphoglycerate kinase OS=Drosophila melanogaster OX=7227 GN=Pgk PE=2 SV=2	0.0489157
>tr|Q9W374|Q9W374_DROME Dihydropyrimidine dehydrogenase [NADP(+)] OS=Drosophila melanogaster OX=7227 GN=su(r) PE=1 SV=2	-0.130941		>sp|Q01604|PGK_DROME Phosphoglycerate kinase OS=Drosophila melanogaster OX=7227 GN=Pgk PE=2 SV=2	0.0489157
>tr|Q9W374|Q9W374_DROME Dihydropyrimidine dehydrogenase [NADP(+)] OS=Drosophila melanogaster OX=7227 GN=su(r) PE=1 SV=2	-0.130941		>sp|Q01604|PGK_DROME Phosphoglycerate kinase OS=Drosophila melanogaster OX=7227 GN=Pgk PE=2 SV=2	0.0489157
>tr|Q9W374|Q9W374_DROME Dihydropyrimidine dehydrogenase [NADP(+)] OS=Drosophila melanogaster OX=7227 GN=su(r) PE=1 SV=2	-0.130941		>tr|Q7KSQ0|Q7KSQ0_DROME LD46175p OS=Drosophila melanogaster OX=7227 GN=sea PE=1 SV=1	0.0485804
>sp|Q9NK57|NIF3L_DROME NIF3-like protein 1 OS=Drosophila melanogaster OX=7227 GN=anon-35F/36A PE=1 SV=3	-0.131849		>tr|Q7KSQ0|Q7KSQ0_DROME LD46175p OS=Drosophila melanogaster OX=7227 GN=sea PE=1 SV=1	0.0485804
>sp|Q9NK57|NIF3L_DROME NIF3-like protein 1 OS=Drosophila melanogaster OX=7227 GN=anon-35F/36A PE=1 SV=3	-0.131849		>tr|Q7KSQ0|Q7KSQ0_DROME LD46175p OS=Drosophila melanogaster OX=7227 GN=sea PE=1 SV=1	0.0485804
>sp|Q9NK57|NIF3L_DROME NIF3-like protein 1 OS=Drosophila melanogaster OX=7227 GN=anon-35F/36A PE=1 SV=3	-0.131849		>tr|Q0E9G4|Q0E9G4_DROME CG1600-PA OS=Drosophila melanogaster OX=7227 GN=Drat PE=1 SV=1	0.0464567
>tr|Q9VB64|Q9VB64_DROME Uncharacterized protein, isoform A OS=Drosophila melanogaster OX=7227 GN=CG31063 PE=1 SV=3	-0.133019		>tr|Q9VV75|Q9VV75_DROME AT02348p OS=Drosophila melanogaster OX=7227 GN=UQCR-C2 PE=1 SV=1	0.0447727
>tr|Q9VIM0|Q9VIM0_DROME GH14278p OS=Drosophila melanogaster OX=7227 GN=38C.55 PE=1 SV=1	-0.133263		>tr|Q9VV75|Q9VV75_DROME AT02348p OS=Drosophila melanogaster OX=7227 GN=UQCR-C2 PE=1 SV=1	0.0447727
>tr|Q9VMG0|Q9VMG0_DROME Arylalkylamine N-acetyltransferase-like 2, isoform A OS=Drosophila melanogaster OX=7227 GN=AANATL2 PE=4 SV=1	-0.134722		>tr|Q9VV75|Q9VV75_DROME AT02348p OS=Drosophila melanogaster OX=7227 GN=UQCR-C2 PE=1 SV=1	0.0447727
>sp|Q9W265|HOT_DROME Probable hydroxyacid-oxoacid transhydrogenase, mitochondrial OS=Drosophila melanogaster OX=7227 GN=T3dh PE=2 SV=1	-0.135991		>tr|A1Z8D3|A1Z8D3_DROME FMN hydroxy acid dehydrogenase domain-containing protein OS=Drosophila melanogaster OX=7227 GN=Dmel\CG18003 PE=1 SV=1	0.0445355
>tr|Q9VQL7|Q9VQL7_DROME Fatty acid synthase 1, isoform A OS=Drosophila melanogaster OX=7227 GN=FASN1 PE=1 SV=1	-0.1363		>tr|A1Z8D3|A1Z8D3_DROME FMN hydroxy acid dehydrogenase domain-containing protein OS=Drosophila melanogaster OX=7227 GN=Dmel\CG18003 PE=1 SV=1	0.0445355
>tr|Q9VQL7|Q9VQL7_DROME Fatty acid synthase 1, isoform A OS=Drosophila melanogaster OX=7227 GN=FASN1 PE=1 SV=1	-0.1363		>sp|P13706|GPDA_DROME Glycerol-3-phosphate dehydrogenase [NAD(+)], cytoplasmic OS=Drosophila melanogaster OX=7227 GN=Gpdh PE=1 SV=3	0.0438017
>tr|Q9VQL7|Q9VQL7_DROME Fatty acid synthase 1, isoform A OS=Drosophila melanogaster OX=7227 GN=FASN1 PE=1 SV=1	-0.1363		>sp|P13706|GPDA_DROME Glycerol-3-phosphate dehydrogenase [NAD(+)], cytoplasmic OS=Drosophila melanogaster OX=7227 GN=Gpdh PE=1 SV=3	0.0438017
>tr|Q8STA5|Q8STA5_DROME RH02823p OS=Drosophila melanogaster OX=7227 GN=HINT1 PE=1 SV=1	-0.136667		>sp|P13706|GPDA_DROME Glycerol-3-phosphate dehydrogenase [NAD(+)], cytoplasmic OS=Drosophila melanogaster OX=7227 GN=Gpdh PE=1 SV=3	0.0438017
>tr|Q8STA5|Q8STA5_DROME RH02823p OS=Drosophila melanogaster OX=7227 GN=HINT1 PE=1 SV=1	-0.136667		>tr|Q9VBV8|Q9VBV8_DROME Mannosyltransferase OS=Drosophila melanogaster OX=7227 GN=Alg9 PE=2 SV=1	0.0425361
>sp|P33269|CP4D1_DROME Cytochrome P450 4d1 OS=Drosophila melanogaster OX=7227 GN=Cyp4d1 PE=2 SV=2	-0.137109		>tr|Q9VBV8|Q9VBV8_DROME Mannosyltransferase OS=Drosophila melanogaster OX=7227 GN=Alg9 PE=2 SV=1	0.0425361
>tr|Q9XZ68|Q9XZ68_DROME Geranylgeranyl transferase type-2 subunit beta OS=Drosophila melanogaster OX=7227 GN=betaggt-II PE=1 SV=1	-0.137176		>tr|Q7K5K3|Q7K5K3_DROME Pyruvate dehydrogenase E1 component subunit beta OS=Drosophila melanogaster OX=7227 GN=Pdhb PE=1 SV=1	0.0413699
>tr|Q0E8U4|Q0E8U4_DROME FI09636p OS=Drosophila melanogaster OX=7227 GN=Dmel\CG17224 PE=1 SV=1	-0.137333		>tr|Q7K5K3|Q7K5K3_DROME Pyruvate dehydrogenase E1 component subunit beta OS=Drosophila melanogaster OX=7227 GN=Pdhb PE=1 SV=1	0.0413699
>sp|P36951|HYI_DROME Putative hydroxypyruvate isomerase OS=Drosophila melanogaster OX=7227 GN=Gip PE=2 SV=1	-0.1375		>tr|Q7K5K3|Q7K5K3_DROME Pyruvate dehydrogenase E1 component subunit beta OS=Drosophila melanogaster OX=7227 GN=Pdhb PE=1 SV=1	0.0413699
>sp|P36951|HYI_DROME Putative hydroxypyruvate isomerase OS=Drosophila melanogaster OX=7227 GN=Gip PE=2 SV=1	-0.1375		>sp|Q9V3W0|UK114_DROME RutC family protein UK114 OS=Drosophila melanogaster OX=7227 GN=UK114 PE=2 SV=1	0.0405797
>tr|A0AQH0|A0AQH0_DROME Proteasome subunit beta OS=Drosophila melanogaster OX=7227 GN=Prosbeta1 PE=1 SV=1	-0.1375		>sp|Q9V3W0|UK114_DROME RutC family protein UK114 OS=Drosophila melanogaster OX=7227 GN=UK114 PE=2 SV=1	0.0405797
>sp|P36951|HYI_DROME Putative hydroxypyruvate isomerase OS=Drosophila melanogaster OX=7227 GN=Gip PE=2 SV=1	-0.1375		>sp|Q9V3W0|UK114_DROME RutC family protein UK114 OS=Drosophila melanogaster OX=7227 GN=UK114 PE=2 SV=1	0.0405797
>tr|A0AQH0|A0AQH0_DROME Proteasome subunit beta OS=Drosophila melanogaster OX=7227 GN=Prosbeta1 PE=1 SV=1	-0.1375		>tr|Q7K3N4|Q7K3N4_DROME GH26015p OS=Drosophila melanogaster OX=7227 GN=Dmel\CG8888 PE=1 SV=1	0.0399485
>tr|Q9VH26|Q9VH26_DROME Carbonic anhydrase 7, isoform A OS=Drosophila melanogaster OX=7227 GN=CAH7 PE=3 SV=2	-0.137829		>tr|Q7K3N4|Q7K3N4_DROME GH26015p OS=Drosophila melanogaster OX=7227 GN=Dmel\CG8888 PE=1 SV=1	0.0399485
>sp|Q9VUY9|PGM_DROME Phosphoglucomutase OS=Drosophila melanogaster OX=7227 GN=Pgm1 PE=1 SV=1	-0.137857		>tr|Q7K3N4|Q7K3N4_DROME GH26015p OS=Drosophila melanogaster OX=7227 GN=Dmel\CG8888 PE=1 SV=1	0.0399485
>sp|Q9VUY9|PGM_DROME Phosphoglucomutase OS=Drosophila melanogaster OX=7227 GN=Pgm1 PE=1 SV=1	-0.137857		>tr|Q9VII5|Q9VII5_DROME GEO08323p1 OS=Drosophila melanogaster OX=7227 GN=Dmel\CG31676 PE=2 SV=3	0.0396226
>sp|Q9VUY9|PGM_DROME Phosphoglucomutase OS=Drosophila melanogaster OX=7227 GN=Pgm1 PE=1 SV=1	-0.137857		>sp|Q8SY61|OB56D_DROME General odorant-binding protein 56d OS=Drosophila melanogaster OX=7227 GN=Obp56d PE=1 SV=2	0.0381679
>tr|Q9VDC6|Q9VDC6_DROME Ebony OS=Drosophila melanogaster OX=7227 GN=e PE=1 SV=1	-0.137998		>sp|Q8SY61|OB56D_DROME General odorant-binding protein 56d OS=Drosophila melanogaster OX=7227 GN=Obp56d PE=1 SV=2	0.0381679
>tr|Q9VDC6|Q9VDC6_DROME Ebony OS=Drosophila melanogaster OX=7227 GN=e PE=1 SV=1	-0.137998		>sp|Q8SY61|OB56D_DROME General odorant-binding protein 56d OS=Drosophila melanogaster OX=7227 GN=Obp56d PE=1 SV=2	0.0381679
>tr|Q9VDC6|Q9VDC6_DROME Ebony OS=Drosophila melanogaster OX=7227 GN=e PE=1 SV=1	-0.137998		>tr|Q9VL61|Q9VL61_DROME FI22810p1 OS=Drosophila melanogaster OX=7227 GN=Dmel\CG5853 PE=2 SV=1	0.037881
>tr|Q9VIH1|Q9VIH1_DROME CG9273 protein OS=Drosophila melanogaster OX=7227 GN=RPA2 PE=1 SV=2	-0.138211		>tr|Q9VL61|Q9VL61_DROME FI22810p1 OS=Drosophila melanogaster OX=7227 GN=Dmel\CG5853 PE=2 SV=1	0.037881
>tr|Q7K5N8|Q7K5N8_DROME GH01592p OS=Drosophila melanogaster OX=7227 GN=BEST:GH19547 PE=1 SV=1	-0.139231		>tr|Q9VL61|Q9VL61_DROME FI22810p1 OS=Drosophila melanogaster OX=7227 GN=Dmel\CG5853 PE=2 SV=1	0.037881
>tr|Q7K5N8|Q7K5N8_DROME GH01592p OS=Drosophila melanogaster OX=7227 GN=BEST:GH19547 PE=1 SV=1	-0.139231		>tr|Q8IML5|Q8IML5_DROME V-type proton ATPase subunit a OS=Drosophila melanogaster OX=7227 GN=Vha100-1 PE=1 SV=1	0.0364946
>sp|O97067|PTH2_DROME Probable peptidyl-tRNA hydrolase 2 OS=Drosophila melanogaster OX=7227 GN=CG1307 PE=2 SV=2	-0.139247		>tr|Q9W3N9|Q9W3N9_DROME LD24105p OS=Drosophila melanogaster OX=7227 GN=154229_at PE=1 SV=1	0.0363415
>sp|P16914|ELAV_DROME Protein elav OS=Drosophila melanogaster OX=7227 GN=elav PE=2 SV=1	-0.139752		>tr|Q9W3N9|Q9W3N9_DROME LD24105p OS=Drosophila melanogaster OX=7227 GN=154229_at PE=1 SV=1	0.0363415
>sp|P16914|ELAV_DROME Protein elav OS=Drosophila melanogaster OX=7227 GN=elav PE=2 SV=1	-0.139752		>tr|Q7JWI7|Q7JWI7_DROME Hermes, isoform A OS=Drosophila melanogaster OX=7227 GN=hrm PE=1 SV=1	0.0363222
>sp|Q08694|LYSB_DROME Lysozyme B OS=Drosophila melanogaster OX=7227 GN=LysB PE=2 SV=2	-0.14		>sp|Q9U6L5|PEB1_DROME Ejaculatory bulb-specific protein 1 OS=Drosophila melanogaster OX=7227 GN=Ebp PE=1 SV=1	0.0360743
>sp|Q08694|LYSB_DROME Lysozyme B OS=Drosophila melanogaster OX=7227 GN=LysB PE=2 SV=2	-0.14		>sp|Q9U6L5|PEB1_DROME Ejaculatory bulb-specific protein 1 OS=Drosophila melanogaster OX=7227 GN=Ebp PE=1 SV=1	0.0360743
>tr|Q9VAW3|Q9VAW3_DROME GH12731p OS=Drosophila melanogaster OX=7227 GN=Gfat2 PE=1 SV=1	-0.141142		>sp|Q9U6L5|PEB1_DROME Ejaculatory bulb-specific protein 1 OS=Drosophila melanogaster OX=7227 GN=Ebp PE=1 SV=1	0.0360743
>tr|Q9VAW3|Q9VAW3_DROME GH12731p OS=Drosophila melanogaster OX=7227 GN=Gfat2 PE=1 SV=1	-0.141142		>tr|Q9VLJ7|Q9VLJ7_DROME Fatty acyl-CoA reductase OS=Drosophila melanogaster OX=7227 GN=Sgp PE=2 SV=2	0.034608
>sp|Q9VZ64|6PGL_DROME Probable 6-phosphogluconolactonase OS=Drosophila melanogaster OX=7227 GN=CG17333 PE=2 SV=1	-0.141564		>tr|Q9VLJ7|Q9VLJ7_DROME Fatty acyl-CoA reductase OS=Drosophila melanogaster OX=7227 GN=Sgp PE=2 SV=2	0.034608
>sp|Q9VZ64|6PGL_DROME Probable 6-phosphogluconolactonase OS=Drosophila melanogaster OX=7227 GN=CG17333 PE=2 SV=1	-0.141564		>tr|Q9VLJ7|Q9VLJ7_DROME Fatty acyl-CoA reductase OS=Drosophila melanogaster OX=7227 GN=Sgp PE=2 SV=2	0.034608
>sp|Q9VZ64|6PGL_DROME Probable 6-phosphogluconolactonase OS=Drosophila melanogaster OX=7227 GN=CG17333 PE=2 SV=1	-0.141564		>tr|Q9VA93|Q9VA93_DROME FA_desaturase domain-containing protein OS=Drosophila melanogaster OX=7227 GN=Dmel\CG15531 PE=3 SV=1	0.0341317
>tr|Q9VY92|Q9VY92_DROME GEO07753p1 OS=Drosophila melanogaster OX=7227 GN=Dmel\CG11151 PE=1 SV=1	-0.142609		>tr|Q9VA93|Q9VA93_DROME FA_desaturase domain-containing protein OS=Drosophila melanogaster OX=7227 GN=Dmel\CG15531 PE=3 SV=1	0.0341317
>tr|Q9VY92|Q9VY92_DROME GEO07753p1 OS=Drosophila melanogaster OX=7227 GN=Dmel\CG11151 PE=1 SV=1	-0.142609		>tr|Q9VVL7|Q9VVL7_DROME Dihydrolipoyl dehydrogenase OS=Drosophila melanogaster OX=7227 GN=E3 PE=1 SV=1	0.0339286
>tr|Q9VY92|Q9VY92_DROME GEO07753p1 OS=Drosophila melanogaster OX=7227 GN=Dmel\CG11151 PE=1 SV=1	-0.142609		>tr|Q9VVL7|Q9VVL7_DROME Dihydrolipoyl dehydrogenase OS=Drosophila melanogaster OX=7227 GN=E3 PE=1 SV=1	0.0339286
>tr|A0A0B4LI06|A0A0B4LI06_DROME Pasilla, isoform T OS=Drosophila melanogaster OX=7227 GN=ps PE=1 SV=1	-0.143019		>tr|Q9VVL7|Q9VVL7_DROME Dihydrolipoyl dehydrogenase OS=Drosophila melanogaster OX=7227 GN=E3 PE=1 SV=1	0.0339286
>tr|Q9VJZ6|Q9VJZ6_DROME LD40224p OS=Drosophila melanogaster OX=7227 GN=Grx4 PE=1 SV=1	-0.143981		>sp|Q05825|ATPB_DROME ATP synthase subunit beta, mitochondrial OS=Drosophila melanogaster OX=7227 GN=ATPsynbeta PE=1 SV=3	0.0336634
>tr|Q9VJZ6|Q9VJZ6_DROME LD40224p OS=Drosophila melanogaster OX=7227 GN=Grx4 PE=1 SV=1	-0.143981		>sp|Q05825|ATPB_DROME ATP synthase subunit beta, mitochondrial OS=Drosophila melanogaster OX=7227 GN=ATPsynbeta PE=1 SV=3	0.0336634
>tr|Q9VYG8|Q9VYG8_DROME CG15717-PA OS=Drosophila melanogaster OX=7227 GN=Dmel\CG15717 PE=1 SV=1	-0.144048		>sp|Q05825|ATPB_DROME ATP synthase subunit beta, mitochondrial OS=Drosophila melanogaster OX=7227 GN=ATPsynbeta PE=1 SV=3	0.0336634
>tr|Q9VIJ0|Q9VIJ0_DROME Uncharacterized protein, isoform A OS=Drosophila melanogaster OX=7227 GN=Dmel\CG9331 PE=1 SV=3	-0.145055		>tr|Q8IML4|Q8IML4_DROME V-type proton ATPase subunit a OS=Drosophila melanogaster OX=7227 GN=Vha100-1 PE=1 SV=1	0.0331765
>tr|Q9VIJ0|Q9VIJ0_DROME Uncharacterized protein, isoform A OS=Drosophila melanogaster OX=7227 GN=Dmel\CG9331 PE=1 SV=3	-0.145055		>tr|Q8IML4|Q8IML4_DROME V-type proton ATPase subunit a OS=Drosophila melanogaster OX=7227 GN=Vha100-1 PE=1 SV=1	0.0331765
>tr|Q9VIJ0|Q9VIJ0_DROME Uncharacterized protein, isoform A OS=Drosophila melanogaster OX=7227 GN=Dmel\CG9331 PE=1 SV=3	-0.145055		>sp|Q9U6A0|NCKX_DROME Sodium/potassium/calcium exchanger Nckx30C OS=Drosophila melanogaster OX=7227 GN=Nckx30C PE=2 SV=4	0.0324631
>tr|Q8SXQ1|Q8SXQ1_DROME Aldehyde dehydrogenase 7 family member A1 OS=Drosophila melanogaster OX=7227 GN=Aldh7A1 PE=1 SV=1	-0.14537		>sp|Q9U6A0|NCKX_DROME Sodium/potassium/calcium exchanger Nckx30C OS=Drosophila melanogaster OX=7227 GN=Nckx30C PE=2 SV=4	0.0324631
>tr|Q8SXQ1|Q8SXQ1_DROME Aldehyde dehydrogenase 7 family member A1 OS=Drosophila melanogaster OX=7227 GN=Aldh7A1 PE=1 SV=1	-0.14537		>tr|Q9VCK6|Q9VCK6_DROME LD34157p OS=Drosophila melanogaster OX=7227 GN=Dmel\CG10184 PE=1 SV=1	0.0315927
>tr|Q8SXQ1|Q8SXQ1_DROME Aldehyde dehydrogenase 7 family member A1 OS=Drosophila melanogaster OX=7227 GN=Aldh7A1 PE=1 SV=1	-0.14537		>tr|Q9VCK6|Q9VCK6_DROME LD34157p OS=Drosophila melanogaster OX=7227 GN=Dmel\CG10184 PE=1 SV=1	0.0315927
>sp|Q8SYG2|CSN3_DROME COP9 signalosome complex subunit 3 OS=Drosophila melanogaster OX=7227 GN=CSN3 PE=2 SV=2	-0.145618		>tr|Q9VCK6|Q9VCK6_DROME LD34157p OS=Drosophila melanogaster OX=7227 GN=Dmel\CG10184 PE=1 SV=1	0.0315927
>tr|Q7JR58|Q7JR58_DROME Enoyl-CoA hydratase, short chain 1, isoform A OS=Drosophila melanogaster OX=7227 GN=Echs1 PE=1 SV=1	-0.145763		>tr|Q9VG87|Q9VG87_DROME Fatty acyl-CoA reductase OS=Drosophila melanogaster OX=7227 GN=CG32919 PE=2 SV=2	0.0314741
>tr|Q7JR58|Q7JR58_DROME Enoyl-CoA hydratase, short chain 1, isoform A OS=Drosophila melanogaster OX=7227 GN=Echs1 PE=1 SV=1	-0.145763		>tr|Q9VG87|Q9VG87_DROME Fatty acyl-CoA reductase OS=Drosophila melanogaster OX=7227 GN=CG32919 PE=2 SV=2	0.0314741
>tr|Q7JR58|Q7JR58_DROME Enoyl-CoA hydratase, short chain 1, isoform A OS=Drosophila melanogaster OX=7227 GN=Echs1 PE=1 SV=1	-0.145763		>tr|Q9VG87|Q9VG87_DROME Fatty acyl-CoA reductase OS=Drosophila melanogaster OX=7227 GN=CG32919 PE=2 SV=2	0.0314741
>tr|Q9VAC1|Q9VAC1_DROME GM14349p OS=Drosophila melanogaster OX=7227 GN=anon-WO0153538.36 PE=1 SV=1	-0.147589		>tr|Q8IPP8|Q8IPP8_DROME Uncharacterized protein OS=Drosophila melanogaster OX=7227 GN=Dmel\CG31548 PE=1 SV=1	0.0308594
>tr|Q9VAC1|Q9VAC1_DROME GM14349p OS=Drosophila melanogaster OX=7227 GN=anon-WO0153538.36 PE=1 SV=1	-0.147589		>tr|Q8IPP8|Q8IPP8_DROME Uncharacterized protein OS=Drosophila melanogaster OX=7227 GN=Dmel\CG31548 PE=1 SV=1	0.0308594
>tr|Q9VAC1|Q9VAC1_DROME GM14349p OS=Drosophila melanogaster OX=7227 GN=anon-WO0153538.36 PE=1 SV=1	-0.147589		>tr|Q8IPP8|Q8IPP8_DROME Uncharacterized protein OS=Drosophila melanogaster OX=7227 GN=Dmel\CG31548 PE=1 SV=1	0.0308594
>tr|Q7JYW9|Q7JYW9_DROME Phosphotransferase OS=Drosophila melanogaster OX=7227 GN=Hex-C PE=1 SV=1	-0.147797		>tr|Q960M4|Q960M4_DROME Peroxiredoxin OS=Drosophila melanogaster OX=7227 GN=Prx5 PE=1 SV=1	0.0305263
>tr|Q7JYW9|Q7JYW9_DROME Phosphotransferase OS=Drosophila melanogaster OX=7227 GN=Hex-C PE=1 SV=1	-0.147797		>tr|Q960M4|Q960M4_DROME Peroxiredoxin OS=Drosophila melanogaster OX=7227 GN=Prx5 PE=1 SV=1	0.0305263
>tr|Q7JYW9|Q7JYW9_DROME Phosphotransferase OS=Drosophila melanogaster OX=7227 GN=Hex-C PE=1 SV=1	-0.147797		>tr|Q960M4|Q960M4_DROME Peroxiredoxin OS=Drosophila melanogaster OX=7227 GN=Prx5 PE=1 SV=1	0.0305263
>tr|Q9VMH9|Q9VMH9_DROME Uncharacterized protein OS=Drosophila melanogaster OX=7227 GN=Dmel\CG9150 PE=3 SV=2	-0.147809		>sp|P07486|G3P1_DROME Glyceraldehyde-3-phosphate dehydrogenase 1 OS=Drosophila melanogaster OX=7227 GN=Gapdh1 PE=2 SV=2	0.0304217
>tr|Q9VMH9|Q9VMH9_DROME Uncharacterized protein OS=Drosophila melanogaster OX=7227 GN=Dmel\CG9150 PE=3 SV=2	-0.147809		>sp|P07486|G3P1_DROME Glyceraldehyde-3-phosphate dehydrogenase 1 OS=Drosophila melanogaster OX=7227 GN=Gapdh1 PE=2 SV=2	0.0304217
>tr|Q9VMH9|Q9VMH9_DROME Uncharacterized protein OS=Drosophila melanogaster OX=7227 GN=Dmel\CG9150 PE=3 SV=2	-0.147809		>sp|P07486|G3P1_DROME Glyceraldehyde-3-phosphate dehydrogenase 1 OS=Drosophila melanogaster OX=7227 GN=Gapdh1 PE=2 SV=2	0.0304217
>sp|Q9W1X4|NU214_DROME Nuclear pore complex protein Nup214 OS=Drosophila melanogaster OX=7227 GN=Nup214 PE=1 SV=2	-0.147867		>tr|Q9I7I3|Q9I7I3_DROME GH12831p OS=Drosophila melanogaster OX=7227 GN=CG17837 PE=2 SV=2	0.0296928
>tr|Q9VIG3|Q9VIG3_DROME IP12580p1 OS=Drosophila melanogaster OX=7227 GN=Dmel\CG9259 PE=2 SV=1	-0.148341		>sp|O46202|A62F_DROME Accessory gland protein Acp62F OS=Drosophila melanogaster OX=7227 GN=Acp62F PE=2 SV=1	0.0295652
>tr|Q9W247|Q9W247_DROME FI03324p OS=Drosophila melanogaster OX=7227 GN=Dmel\CG4752 PE=1 SV=2	-0.148609		>sp|O46202|A62F_DROME Accessory gland protein Acp62F OS=Drosophila melanogaster OX=7227 GN=Acp62F PE=2 SV=1	0.0295652
>tr|Q9W247|Q9W247_DROME FI03324p OS=Drosophila melanogaster OX=7227 GN=Dmel\CG4752 PE=1 SV=2	-0.148609		>sp|O46202|A62F_DROME Accessory gland protein Acp62F OS=Drosophila melanogaster OX=7227 GN=Acp62F PE=2 SV=1	0.0295652
>sp|P25843|PROF_DROME Profilin OS=Drosophila melanogaster OX=7227 GN=chic PE=1 SV=1	-0.149206		>tr|Q9VRW2|Q9VRW2_DROME Uncharacterized protein, isoform A OS=Drosophila melanogaster OX=7227 GN=Dmel\CG10226 PE=4 SV=1	0.0290909
>sp|P25843|PROF_DROME Profilin OS=Drosophila melanogaster OX=7227 GN=chic PE=1 SV=1	-0.149206		>tr|Q9VRW2|Q9VRW2_DROME Uncharacterized protein, isoform A OS=Drosophila melanogaster OX=7227 GN=Dmel\CG10226 PE=4 SV=1	0.0290909
>sp|P25843|PROF_DROME Profilin OS=Drosophila melanogaster OX=7227 GN=chic PE=1 SV=1	-0.149206		>tr|Q7KVB1|Q7KVB1_DROME ATP binding cassette subfamily B member 7, isoform B OS=Drosophila melanogaster OX=7227 GN=ABCB7 PE=1 SV=1	0.0284908
>tr|M9PE54|M9PE54_DROME Uncharacterized protein, isoform B OS=Drosophila melanogaster OX=7227 GN=BVRA PE=1 SV=1	-0.149258		>tr|Q7KVB1|Q7KVB1_DROME ATP binding cassette subfamily B member 7, isoform B OS=Drosophila melanogaster OX=7227 GN=ABCB7 PE=1 SV=1	0.0284908
>tr|M9PE54|M9PE54_DROME Uncharacterized protein, isoform B OS=Drosophila melanogaster OX=7227 GN=BVRA PE=1 SV=1	-0.149258		>tr|Q7KVB1|Q7KVB1_DROME ATP binding cassette subfamily B member 7, isoform B OS=Drosophila melanogaster OX=7227 GN=ABCB7 PE=1 SV=1	0.0284908
>tr|M9PE54|M9PE54_DROME Uncharacterized protein, isoform B OS=Drosophila melanogaster OX=7227 GN=BVRA PE=1 SV=1	-0.149258		>sp|Q9VN13|SFXN1_DROME Sideroflexin-1-3 OS=Drosophila melanogaster OX=7227 GN=Sfxn1-3 PE=2 SV=1	0.0283489
>tr|M9PG67|M9PG67_DROME Uncharacterized protein, isoform D OS=Drosophila melanogaster OX=7227 GN=Dmel\CG5618 PE=1 SV=1	-0.15		>sp|Q9VN13|SFXN1_DROME Sideroflexin-1-3 OS=Drosophila melanogaster OX=7227 GN=Sfxn1-3 PE=2 SV=1	0.0283489
>tr|M9PG67|M9PG67_DROME Uncharacterized protein, isoform D OS=Drosophila melanogaster OX=7227 GN=Dmel\CG5618 PE=1 SV=1	-0.15		>sp|Q9VN13|SFXN1_DROME Sideroflexin-1-3 OS=Drosophila melanogaster OX=7227 GN=Sfxn1-3 PE=2 SV=1	0.0283489
>sp|P12982|PP12_DROME Serine/threonine-protein phosphatase alpha-2 isoform OS=Drosophila melanogaster OX=7227 GN=Pp1-87B PE=1 SV=1	-0.150662		>tr|Q9VE75|Q9VE75_DROME V-type proton ATPase subunit a OS=Drosophila melanogaster OX=7227 GN=Vha100-2 PE=1 SV=2	0.0269784
>sp|P12982|PP12_DROME Serine/threonine-protein phosphatase alpha-2 isoform OS=Drosophila melanogaster OX=7227 GN=Pp1-87B PE=1 SV=1	-0.150662		>tr|Q9VE75|Q9VE75_DROME V-type proton ATPase subunit a OS=Drosophila melanogaster OX=7227 GN=Vha100-2 PE=1 SV=2	0.0269784
>sp|P31409|VATB_DROME V-type proton ATPase subunit B OS=Drosophila melanogaster OX=7227 GN=Vha55 PE=2 SV=1	-0.150816		>tr|Q9VE75|Q9VE75_DROME V-type proton ATPase subunit a OS=Drosophila melanogaster OX=7227 GN=Vha100-2 PE=1 SV=2	0.0269784
>sp|P31409|VATB_DROME V-type proton ATPase subunit B OS=Drosophila melanogaster OX=7227 GN=Vha55 PE=2 SV=1	-0.150816		>tr|A1Z9U2|A1Z9U2_DROME Jet fuel, isoform A OS=Drosophila melanogaster OX=7227 GN=jef PE=1 SV=1	0.0269029
>sp|P31409|VATB_DROME V-type proton ATPase subunit B OS=Drosophila melanogaster OX=7227 GN=Vha55 PE=2 SV=1	-0.150816		>tr|A1Z9U2|A1Z9U2_DROME Jet fuel, isoform A OS=Drosophila melanogaster OX=7227 GN=jef PE=1 SV=1	0.0269029
>tr|Q9VZJ8|Q9VZJ8_DROME RH40737p OS=Drosophila melanogaster OX=7227 GN=Dmel\CG11594 PE=1 SV=1	-0.151095		>tr|A1Z9U2|A1Z9U2_DROME Jet fuel, isoform A OS=Drosophila melanogaster OX=7227 GN=jef PE=1 SV=1	0.0269029
>tr|Q9VZJ8|Q9VZJ8_DROME RH40737p OS=Drosophila melanogaster OX=7227 GN=Dmel\CG11594 PE=1 SV=1	-0.151095		>tr|Q9VPX0|Q9VPX0_DROME GH26159p OS=Drosophila melanogaster OX=7227 GN=Iris PE=2 SV=1	0.0254237
>tr|Q9VZJ8|Q9VZJ8_DROME RH40737p OS=Drosophila melanogaster OX=7227 GN=Dmel\CG11594 PE=1 SV=1	-0.151095		>tr|Q9VJ46|Q9VJ46_DROME UDP-glucuronosyltransferase OS=Drosophila melanogaster OX=7227 GN=Ugt36D1 PE=2 SV=1	0.0252408
>tr|Q7JWD6|Q7JWD6_DROME Elongin C, isoform A OS=Drosophila melanogaster OX=7227 GN=EloC PE=1 SV=1	-0.151282		>tr|Q9VUE4|Q9VUE4_DROME Uncharacterized protein OS=Drosophila melanogaster OX=7227 GN=Dmel\CG3868 PE=4 SV=1	0.0252149
>tr|Q7JWD6|Q7JWD6_DROME Elongin C, isoform A OS=Drosophila melanogaster OX=7227 GN=EloC PE=1 SV=1	-0.151282		>tr|Q9VU38|Q9VU38_DROME Adenosine kinase, isoform B OS=Drosophila melanogaster OX=7227 GN=AdenoK PE=1 SV=1	0.024058
>tr|Q9VB69|Q9VB69_DROME Malic enzyme OS=Drosophila melanogaster OX=7227 GN=Men-b PE=1 SV=1	-0.152026		>tr|Q9VU38|Q9VU38_DROME Adenosine kinase, isoform B OS=Drosophila melanogaster OX=7227 GN=AdenoK PE=1 SV=1	0.024058
>tr|Q9VEJ0|Q9VEJ0_DROME Peroxiredoxin 3 OS=Drosophila melanogaster OX=7227 GN=Prx3 PE=1 SV=2	-0.152137		>tr|Q9VU38|Q9VU38_DROME Adenosine kinase, isoform B OS=Drosophila melanogaster OX=7227 GN=AdenoK PE=1 SV=1	0.024058
>tr|Q9VEJ0|Q9VEJ0_DROME Peroxiredoxin 3 OS=Drosophila melanogaster OX=7227 GN=Prx3 PE=1 SV=2	-0.152137		>tr|Q9VKJ6|Q9VKJ6_DROME Cation-transporting ATPase OS=Drosophila melanogaster OX=7227 GN=Dmel\CG6230 PE=1 SV=1	0.0235918
>tr|Q9VEJ0|Q9VEJ0_DROME Peroxiredoxin 3 OS=Drosophila melanogaster OX=7227 GN=Prx3 PE=1 SV=2	-0.152137		>sp|Q960W6|FACR3_DROME Putative fatty acyl-CoA reductase CG8306 OS=Drosophila melanogaster OX=7227 GN=CG8306 PE=2 SV=1	0.022093
>tr|Q9VIX4|Q9VIX4_DROME Acyl-coenzyme A oxidase OS=Drosophila melanogaster OX=7227 GN=Dmel\CG17544 PE=1 SV=2	-0.152381		>sp|Q960W6|FACR3_DROME Putative fatty acyl-CoA reductase CG8306 OS=Drosophila melanogaster OX=7227 GN=CG8306 PE=2 SV=1	0.022093
>tr|Q9VIX4|Q9VIX4_DROME Acyl-coenzyme A oxidase OS=Drosophila melanogaster OX=7227 GN=Dmel\CG17544 PE=1 SV=2	-0.152381		>sp|Q960W6|FACR3_DROME Putative fatty acyl-CoA reductase CG8306 OS=Drosophila melanogaster OX=7227 GN=CG8306 PE=2 SV=1	0.022093
>tr|Q9W022|Q9W022_DROME GEO01508p1 OS=Drosophila melanogaster OX=7227 GN=Dmel\CG8993 PE=1 SV=1	-0.152817		>sp|Q9VQG4|COLT_DROME Congested-like trachea protein OS=Drosophila melanogaster OX=7227 GN=colt PE=2 SV=1	0.0218954
>tr|Q9W022|Q9W022_DROME GEO01508p1 OS=Drosophila melanogaster OX=7227 GN=Dmel\CG8993 PE=1 SV=1	-0.152817		>sp|Q9VQG4|COLT_DROME Congested-like trachea protein OS=Drosophila melanogaster OX=7227 GN=colt PE=2 SV=1	0.0218954
>sp|P15364|AMAL_DROME Protein amalgam OS=Drosophila melanogaster OX=7227 GN=Ama PE=2 SV=2	-0.153153		>sp|Q9VQG4|COLT_DROME Congested-like trachea protein OS=Drosophila melanogaster OX=7227 GN=colt PE=2 SV=1	0.0218954
>tr|Q9VA67|Q9VA67_DROME Jonah 99Fii OS=Drosophila melanogaster OX=7227 GN=Jon99Fii PE=2 SV=1	-0.155431		>tr|A0A0B4K6E6|A0A0B4K6E6_DROME Uncharacterized protein, isoform C OS=Drosophila melanogaster OX=7227 GN=BcDNA:RH54117 PE=1 SV=1	0.0207547
>sp|P08879|NDKA_DROME Nucleoside diphosphate kinase OS=Drosophila melanogaster OX=7227 GN=awd PE=1 SV=3	-0.155556		>tr|A0A0B4K6E6|A0A0B4K6E6_DROME Uncharacterized protein, isoform C OS=Drosophila melanogaster OX=7227 GN=BcDNA:RH54117 PE=1 SV=1	0.0207547
>sp|P08879|NDKA_DROME Nucleoside diphosphate kinase OS=Drosophila melanogaster OX=7227 GN=awd PE=1 SV=3	-0.155556		>tr|X2J516|X2J516_DROME Trifunctional purine biosynthetic protein adenosine-3 OS=Drosophila melanogaster OX=7227 GN=Gart PE=1 SV=1	0.0203252
>sp|P08879|NDKA_DROME Nucleoside diphosphate kinase OS=Drosophila melanogaster OX=7227 GN=awd PE=1 SV=3	-0.155556		>tr|X2J516|X2J516_DROME Trifunctional purine biosynthetic protein adenosine-3 OS=Drosophila melanogaster OX=7227 GN=Gart PE=1 SV=1	0.0203252
>tr|Q9XYZ9|Q9XYZ9_DROME Glutathione S transferase E12, isoform A OS=Drosophila melanogaster OX=7227 GN=GstE12 PE=1 SV=1	-0.156502		>tr|X2J516|X2J516_DROME Trifunctional purine biosynthetic protein adenosine-3 OS=Drosophila melanogaster OX=7227 GN=Gart PE=1 SV=1	0.0203252
>tr|Q9XYZ9|Q9XYZ9_DROME Glutathione S transferase E12, isoform A OS=Drosophila melanogaster OX=7227 GN=GstE12 PE=1 SV=1	-0.156502		>tr|M9PG15|M9PG15_DROME Secretory pathway calcium atpase, isoform G OS=Drosophila melanogaster OX=7227 GN=SPoCk PE=3 SV=1	0.0194915
>sp|Q9Y0Y2|PURA_DROME Adenylosuccinate synthetase OS=Drosophila melanogaster OX=7227 GN=AdSS PE=2 SV=1	-0.156823		>tr|M9PG15|M9PG15_DROME Secretory pathway calcium atpase, isoform G OS=Drosophila melanogaster OX=7227 GN=SPoCk PE=3 SV=1	0.0194915
>sp|Q9Y0Y2|PURA_DROME Adenylosuccinate synthetase OS=Drosophila melanogaster OX=7227 GN=AdSS PE=2 SV=1	-0.156823		>tr|Q9VZL3|Q9VZL3_DROME Sc2 OS=Drosophila melanogaster OX=7227 GN=Sc2 PE=1 SV=1	0.0192053
>tr|Q9VHF7|Q9VHF7_DROME RE08710p OS=Drosophila melanogaster OX=7227 GN=Dmel\CG16749 PE=1 SV=1	-0.158113		>tr|Q9VZL3|Q9VZL3_DROME Sc2 OS=Drosophila melanogaster OX=7227 GN=Sc2 PE=1 SV=1	0.0192053
>sp|Q9VKJ3|NU160_DROME Nuclear pore complex protein Nup160 homolog OS=Drosophila melanogaster OX=7227 GN=Nup160 PE=1 SV=1	-0.158469		>tr|Q9VZL3|Q9VZL3_DROME Sc2 OS=Drosophila melanogaster OX=7227 GN=Sc2 PE=1 SV=1	0.0192053
>tr|Q8IQZ1|Q8IQZ1_DROME Glutathione synthetase OS=Drosophila melanogaster OX=7227 GN=Gss2 PE=1 SV=2	-0.158656		>sp|P07487|G3P2_DROME Glyceraldehyde-3-phosphate dehydrogenase 2 OS=Drosophila melanogaster OX=7227 GN=Gapdh2 PE=1 SV=2	0.0177711
>tr|Q8IQZ1|Q8IQZ1_DROME Glutathione synthetase OS=Drosophila melanogaster OX=7227 GN=Gss2 PE=1 SV=2	-0.158656		>sp|P07487|G3P2_DROME Glyceraldehyde-3-phosphate dehydrogenase 2 OS=Drosophila melanogaster OX=7227 GN=Gapdh2 PE=1 SV=2	0.0177711
>tr|Q8IQZ1|Q8IQZ1_DROME Glutathione synthetase OS=Drosophila melanogaster OX=7227 GN=Gss2 PE=1 SV=2	-0.158656		>sp|P07487|G3P2_DROME Glyceraldehyde-3-phosphate dehydrogenase 2 OS=Drosophila melanogaster OX=7227 GN=Gapdh2 PE=1 SV=2	0.0177711
>tr|Q9VGK3|Q9VGK3_DROME Peptidylprolyl isomerase OS=Drosophila melanogaster OX=7227 GN=Dmel\CG14715 PE=1 SV=1	-0.158696		>tr|Q9VX02|Q9VX02_DROME GEO04759p1 OS=Drosophila melanogaster OX=7227 GN=bs13c01.y1 PE=1 SV=1	0.0176829
>tr|Q9VUM4|Q9VUM4_DROME AT16346p OS=Drosophila melanogaster OX=7227 GN=Dmel\CG6888 PE=2 SV=1	-0.159184		>sp|Q9V9X4|MTNA_DROME Methylthioribose-1-phosphate isomerase OS=Drosophila melanogaster OX=7227 GN=CG11334 PE=2 SV=1	0.0164835
>tr|Q9VUM4|Q9VUM4_DROME AT16346p OS=Drosophila melanogaster OX=7227 GN=Dmel\CG6888 PE=2 SV=1	-0.159184		>sp|Q9V9X4|MTNA_DROME Methylthioribose-1-phosphate isomerase OS=Drosophila melanogaster OX=7227 GN=CG11334 PE=2 SV=1	0.0164835
>tr|Q9VUM4|Q9VUM4_DROME AT16346p OS=Drosophila melanogaster OX=7227 GN=Dmel\CG6888 PE=2 SV=1	-0.159184		>sp|Q9V9X4|MTNA_DROME Methylthioribose-1-phosphate isomerase OS=Drosophila melanogaster OX=7227 GN=CG11334 PE=2 SV=1	0.0164835
>tr|Q7KSB5|Q7KSB5_DROME S-formylglutathione hydrolase OS=Drosophila melanogaster OX=7227 GN=Dmel\CG4390 PE=1 SV=1	-0.159394		>tr|Q7PLL6|Q7PLL6_DROME Uncharacterized protein, isoform A OS=Drosophila melanogaster OX=7227 GN=l(3)80Fj PE=1 SV=2	0.015057
>sp|Q9VCK2|GILT3_DROME GILT-like protein 3 OS=Drosophila melanogaster OX=7227 GN=GILT3 PE=2 SV=1	-0.160185		>tr|Q9W1E8|Q9W1E8_DROME Adaptor protein complex AP-3 small chain sigma3 OS=Drosophila melanogaster OX=7227 GN=or PE=1 SV=2	0.0141361
>tr|Q9W3X6|Q9W3X6_DROME FI05334p OS=Drosophila melanogaster OX=7227 GN=Fum1 PE=1 SV=3	-0.160202		>tr|Q9VJ45|Q9VJ45_DROME UDP-glucuronosyltransferase OS=Drosophila melanogaster OX=7227 GN=Ugt36E1 PE=2 SV=2	0.0125725
>tr|Q9W3X6|Q9W3X6_DROME FI05334p OS=Drosophila melanogaster OX=7227 GN=Fum1 PE=1 SV=3	-0.160202		>tr|Q9VJ45|Q9VJ45_DROME UDP-glucuronosyltransferase OS=Drosophila melanogaster OX=7227 GN=Ugt36E1 PE=2 SV=2	0.0125725
>tr|Q9W3X6|Q9W3X6_DROME FI05334p OS=Drosophila melanogaster OX=7227 GN=Fum1 PE=1 SV=3	-0.160202		>tr|Q9VJ45|Q9VJ45_DROME UDP-glucuronosyltransferase OS=Drosophila melanogaster OX=7227 GN=Ugt36E1 PE=2 SV=2	0.0125725
>tr|Q9VHA2|Q9VHA2_DROME GH08387p OS=Drosophila melanogaster OX=7227 GN=SpdS PE=1 SV=2	-0.163134		>tr|Q7JYZ0|Q7JYZ0_DROME GEO08206p1 OS=Drosophila melanogaster OX=7227 GN=l(2)k04810 PE=2 SV=1	0.0124224
>tr|Q9VHA2|Q9VHA2_DROME GH08387p OS=Drosophila melanogaster OX=7227 GN=SpdS PE=1 SV=2	-0.163134		>sp|P24156|L2CC_DROME Protein l(2)37Cc OS=Drosophila melanogaster OX=7227 GN=l(2)37Cc PE=2 SV=2	0.0112319
>tr|Q8INA9|Q8INA9_DROME Fasciclin 1, isoform C OS=Drosophila melanogaster OX=7227 GN=Fas1 PE=1 SV=1	-0.164122		>sp|P24156|L2CC_DROME Protein l(2)37Cc OS=Drosophila melanogaster OX=7227 GN=l(2)37Cc PE=2 SV=2	0.0112319
>tr|Q9VPW2|Q9VPW2_DROME Cysteine protease OS=Drosophila melanogaster OX=7227 GN=Atg4a PE=1 SV=1	-0.164477		>sp|P24156|L2CC_DROME Protein l(2)37Cc OS=Drosophila melanogaster OX=7227 GN=l(2)37Cc PE=2 SV=2	0.0112319
>tr|Q9W260|Q9W260_DROME GH03113p OS=Drosophila melanogaster OX=7227 GN=wrapper PE=1 SV=2	-0.1646		>sp|O18388|IMB_DROME Importin subunit beta OS=Drosophila melanogaster OX=7227 GN=Fs(2)Ket PE=1 SV=2	0.0106335
>tr|Q9W260|Q9W260_DROME GH03113p OS=Drosophila melanogaster OX=7227 GN=wrapper PE=1 SV=2	-0.1646		>sp|O18388|IMB_DROME Importin subunit beta OS=Drosophila melanogaster OX=7227 GN=Fs(2)Ket PE=1 SV=2	0.0106335
>tr|Q9W260|Q9W260_DROME GH03113p OS=Drosophila melanogaster OX=7227 GN=wrapper PE=1 SV=2	-0.1646		>sp|O18388|IMB_DROME Importin subunit beta OS=Drosophila melanogaster OX=7227 GN=Fs(2)Ket PE=1 SV=2	0.0106335
>sp|P54351|NSF2_DROME Vesicle-fusing ATPase 2 OS=Drosophila melanogaster OX=7227 GN=Nsf2 PE=2 SV=2	-0.16516		>tr|Q9VMD5|Q9VMD5_DROME Farjavit, isoform A OS=Drosophila melanogaster OX=7227 GN=frj PE=2 SV=1	0.00756646
>tr|Q7KSM5|Q7KSM5_DROME Activator of SUMO 1 OS=Drosophila melanogaster OX=7227 GN=Aos1 PE=1 SV=1	-0.165875		>tr|Q9VUZ0|Q9VUZ0_DROME Translocon-associated protein subunit beta OS=Drosophila melanogaster OX=7227 GN=SsRbeta PE=1 SV=2	0.00736842
>tr|Q9VGC2|Q9VGC2_DROME RE05302p OS=Drosophila melanogaster OX=7227 GN=Dmel\CG4860 PE=2 SV=1	-0.166024		>tr|Q9VUZ0|Q9VUZ0_DROME Translocon-associated protein subunit beta OS=Drosophila melanogaster OX=7227 GN=SsRbeta PE=1 SV=2	0.00736842
>sp|Q9VU41|ZMY10_DROME Zinc finger MYND domain-containing protein 10 homolog OS=Drosophila melanogaster OX=7227 GN=Zmynd10 PE=1 SV=1	-0.167406		>tr|Q9VUZ0|Q9VUZ0_DROME Translocon-associated protein subunit beta OS=Drosophila melanogaster OX=7227 GN=SsRbeta PE=1 SV=2	0.00736842
>tr|Q9VSD6|Q9VSD6_DROME D-Importin 7/RanBP7 OS=Drosophila melanogaster OX=7227 GN=msk PE=1 SV=1	-0.168637		>tr|Q9W0H6|Q9W0H6_DROME Uncharacterized protein OS=Drosophila melanogaster OX=7227 GN=Dmel\CG9149 PE=1 SV=2	0.00688776
>tr|Q9VSD6|Q9VSD6_DROME D-Importin 7/RanBP7 OS=Drosophila melanogaster OX=7227 GN=msk PE=1 SV=1	-0.168637		>tr|Q9W0H6|Q9W0H6_DROME Uncharacterized protein OS=Drosophila melanogaster OX=7227 GN=Dmel\CG9149 PE=1 SV=2	0.00688776
>sp|Q9VQC4|GLCTK_DROME Glycerate kinase OS=Drosophila melanogaster OX=7227 GN=Glyctk PE=2 SV=1	-0.169405		>tr|Q9W0H6|Q9W0H6_DROME Uncharacterized protein OS=Drosophila melanogaster OX=7227 GN=Dmel\CG9149 PE=1 SV=2	0.00688776
>tr|Q9VTI5|Q9VTI5_DROME DI01318p1 OS=Drosophila melanogaster OX=7227 GN=Fum3 PE=2 SV=1	-0.170426		>tr|Q9V3Q9|Q9V3Q9_DROME IP03705p OS=Drosophila melanogaster OX=7227 GN=GABA-B-R1 PE=2 SV=3	0.00665874
>tr|Q9VTI5|Q9VTI5_DROME DI01318p1 OS=Drosophila melanogaster OX=7227 GN=Fum3 PE=2 SV=1	-0.170426		>tr|Q9V3Q9|Q9V3Q9_DROME IP03705p OS=Drosophila melanogaster OX=7227 GN=GABA-B-R1 PE=2 SV=3	0.00665874
>tr|Q0KI96|Q0KI96_DROME Pasilla, isoform K OS=Drosophila melanogaster OX=7227 GN=ps PE=1 SV=1	-0.170909		>tr|Q9VX17|Q9VX17_DROME LD36024p OS=Drosophila melanogaster OX=7227 GN=Dmel\CG6398 PE=2 SV=1	0.00655172
>tr|Q9VLG9|Q9VLG9_DROME Argininosuccinate lyase, isoform B OS=Drosophila melanogaster OX=7227 GN=Argl PE=1 SV=3	-0.171002		>tr|Q9VX17|Q9VX17_DROME LD36024p OS=Drosophila melanogaster OX=7227 GN=Dmel\CG6398 PE=2 SV=1	0.00655172
>tr|Q9VLG9|Q9VLG9_DROME Argininosuccinate lyase, isoform B OS=Drosophila melanogaster OX=7227 GN=Argl PE=1 SV=3	-0.171002		>sp|Q94522|SUCA_DROME Succinate--CoA ligase [ADP/GDP-forming] subunit alpha, mitochondrial OS=Drosophila melanogaster OX=7227 GN=Scsalpha1 PE=2 SV=3	0.00609756
>tr|Q9VLG9|Q9VLG9_DROME Argininosuccinate lyase, isoform B OS=Drosophila melanogaster OX=7227 GN=Argl PE=1 SV=3	-0.171002		>sp|Q94522|SUCA_DROME Succinate--CoA ligase [ADP/GDP-forming] subunit alpha, mitochondrial OS=Drosophila melanogaster OX=7227 GN=Scsalpha1 PE=2 SV=3	0.00609756
>sp|Q9V3J1|VATH_DROME V-type proton ATPase subunit H OS=Drosophila melanogaster OX=7227 GN=VhaSFD PE=2 SV=2	-0.171368		>sp|Q94522|SUCA_DROME Succinate--CoA ligase [ADP/GDP-forming] subunit alpha, mitochondrial OS=Drosophila melanogaster OX=7227 GN=Scsalpha1 PE=2 SV=3	0.00609756
>sp|Q9V3J1|VATH_DROME V-type proton ATPase subunit H OS=Drosophila melanogaster OX=7227 GN=VhaSFD PE=2 SV=2	-0.171368		>tr|X2J986|X2J986_DROME Fat body protein 2, isoform B OS=Drosophila melanogaster OX=7227 GN=Fbp2 PE=3 SV=1	0.00585937
>sp|Q9V3J1|VATH_DROME V-type proton ATPase subunit H OS=Drosophila melanogaster OX=7227 GN=VhaSFD PE=2 SV=2	-0.171368		>tr|X2J986|X2J986_DROME Fat body protein 2, isoform B OS=Drosophila melanogaster OX=7227 GN=Fbp2 PE=3 SV=1	0.00585937
>sp|P18824|ARM_DROME Armadillo segment polarity protein OS=Drosophila melanogaster OX=7227 GN=arm PE=1 SV=1	-0.171412		>tr|Q9W2J4|Q9W2J4_DROME UDP-glucuronosyltransferase OS=Drosophila melanogaster OX=7227 GN=Ugt49B1 PE=1 SV=2	0.00469925
>sp|P18824|ARM_DROME Armadillo segment polarity protein OS=Drosophila melanogaster OX=7227 GN=arm PE=1 SV=1	-0.171412		>tr|Q9W2J4|Q9W2J4_DROME UDP-glucuronosyltransferase OS=Drosophila melanogaster OX=7227 GN=Ugt49B1 PE=1 SV=2	0.00469925
>sp|P18824|ARM_DROME Armadillo segment polarity protein OS=Drosophila melanogaster OX=7227 GN=arm PE=1 SV=1	-0.171412		>tr|Q9W2J4|Q9W2J4_DROME UDP-glucuronosyltransferase OS=Drosophila melanogaster OX=7227 GN=Ugt49B1 PE=1 SV=2	0.00469925
>sp|P83967|ACT6_DROME Actin, indirect flight muscle OS=Drosophila melanogaster OX=7227 GN=Act88F PE=1 SV=1	-0.171543		>tr|A1Z934|A1Z934_DROME SD19268p OS=Drosophila melanogaster OX=7227 GN=Dmel\CG8778 PE=1 SV=1	0.00468227
>sp|P83967|ACT6_DROME Actin, indirect flight muscle OS=Drosophila melanogaster OX=7227 GN=Act88F PE=1 SV=1	-0.171543		>tr|A1Z934|A1Z934_DROME SD19268p OS=Drosophila melanogaster OX=7227 GN=Dmel\CG8778 PE=1 SV=1	0.00468227
>sp|P83967|ACT6_DROME Actin, indirect flight muscle OS=Drosophila melanogaster OX=7227 GN=Act88F PE=1 SV=1	-0.171543		>tr|A1Z934|A1Z934_DROME SD19268p OS=Drosophila melanogaster OX=7227 GN=Dmel\CG8778 PE=1 SV=1	0.00468227
>tr|Q9VZV9|Q9VZV9_DROME HL01494p OS=Drosophila melanogaster OX=7227 GN=Dmel\CG1271 PE=2 SV=2	-0.171763		>tr|A0A0B4JCW4|A0A0B4JCW4_DROME Succinate--CoA ligase [ADP-forming] subunit beta, mitochondrial OS=Drosophila melanogaster OX=7227 GN=ScsbetaA PE=1 SV=1	0.0037694
>tr|Q7JZN0|Q7JZN0_DROME Protein transport protein Sec61 subunit beta OS=Drosophila melanogaster OX=7227 GN=Sec61beta PE=1 SV=1	-0.172		>tr|A0A0B4JCW4|A0A0B4JCW4_DROME Succinate--CoA ligase [ADP-forming] subunit beta, mitochondrial OS=Drosophila melanogaster OX=7227 GN=ScsbetaA PE=1 SV=1	0.0037694
>sp|Q27884|PPP6_DROME Serine/threonine-protein phosphatase 6 catalytic subunit OS=Drosophila melanogaster OX=7227 GN=PpV PE=2 SV=1	-0.172607		>tr|A0A0B4JCW4|A0A0B4JCW4_DROME Succinate--CoA ligase [ADP-forming] subunit beta, mitochondrial OS=Drosophila melanogaster OX=7227 GN=ScsbetaA PE=1 SV=1	0.0037694
>tr|Q9VPH9|Q9VPH9_DROME GH21475p OS=Drosophila melanogaster OX=7227 GN=Spn77Bc PE=1 SV=3	-0.174279		>tr|Q9VX69|Q9VX69_DROME FI01450p OS=Drosophila melanogaster OX=7227 GN=Dmel\CG5162 PE=1 SV=1	0.00291971
>tr|Q9VSR5|Q9VSR5_DROME GM03767p OS=Drosophila melanogaster OX=7227 GN=mRpL12 PE=1 SV=1	-0.174725		>tr|Q9VX69|Q9VX69_DROME FI01450p OS=Drosophila melanogaster OX=7227 GN=Dmel\CG5162 PE=1 SV=1	0.00291971
>tr|Q9VSM7|Q9VSM7_DROME GH13849p OS=Drosophila melanogaster OX=7227 GN=S-Lap2 PE=2 SV=1	-0.175181		>tr|Q9VX69|Q9VX69_DROME FI01450p OS=Drosophila melanogaster OX=7227 GN=Dmel\CG5162 PE=1 SV=1	0.00291971
>tr|Q9VSM7|Q9VSM7_DROME GH13849p OS=Drosophila melanogaster OX=7227 GN=S-Lap2 PE=2 SV=1	-0.175181		>tr|Q9VAD4|Q9VAD4_DROME Eukaryotic translation initiation factor 2B subunit alpha OS=Drosophila melanogaster OX=7227 GN=eIF2Balpha PE=1 SV=1	0.00228758
>tr|Q9VSM7|Q9VSM7_DROME GH13849p OS=Drosophila melanogaster OX=7227 GN=S-Lap2 PE=2 SV=1	-0.175181		>tr|Q9VAD4|Q9VAD4_DROME Eukaryotic translation initiation factor 2B subunit alpha OS=Drosophila melanogaster OX=7227 GN=eIF2Balpha PE=1 SV=1	0.00228758
>tr|Q5LJP0|Q5LJP0_DROME Male fertility factor kl2 OS=Drosophila melanogaster OX=7227 GN=kl-2 PE=4 SV=5	-0.175353		>sp|P48554|RAC2_DROME Ras-related protein Rac2 OS=Drosophila melanogaster OX=7227 GN=Rac2 PE=1 SV=1	0.00208333
>sp|P46461|NSF1_DROME Vesicle-fusing ATPase 1 OS=Drosophila melanogaster OX=7227 GN=comt PE=2 SV=1	-0.175436		>sp|P48554|RAC2_DROME Ras-related protein Rac2 OS=Drosophila melanogaster OX=7227 GN=Rac2 PE=1 SV=1	0.00208333
>sp|P46461|NSF1_DROME Vesicle-fusing ATPase 1 OS=Drosophila melanogaster OX=7227 GN=comt PE=2 SV=1	-0.175436		>sp|P48554|RAC2_DROME Ras-related protein Rac2 OS=Drosophila melanogaster OX=7227 GN=Rac2 PE=1 SV=1	0.00208333
>tr|Q9VEP6|Q9VEP6_DROME Adenylosuccinate lyase OS=Drosophila melanogaster OX=7227 GN=AdSL PE=1 SV=1	-0.175468		>sp|Q9VMY9|GUAD_DROME Guanine deaminase OS=Drosophila melanogaster OX=7227 GN=DhpD PE=1 SV=1	0.0015625
>tr|Q9VEP6|Q9VEP6_DROME Adenylosuccinate lyase OS=Drosophila melanogaster OX=7227 GN=AdSL PE=1 SV=1	-0.175468		>sp|Q9VMY9|GUAD_DROME Guanine deaminase OS=Drosophila melanogaster OX=7227 GN=DhpD PE=1 SV=1	0.0015625
>tr|Q9VEP6|Q9VEP6_DROME Adenylosuccinate lyase OS=Drosophila melanogaster OX=7227 GN=AdSL PE=1 SV=1	-0.175468		>tr|Q9VXC7|Q9VXC7_DROME RE37738p OS=Drosophila melanogaster OX=7227 GN=Dmel\CG9673 PE=1 SV=1	0.000766284
>sp|P53501|ACT3_DROME Actin-57B OS=Drosophila melanogaster OX=7227 GN=Act57B PE=1 SV=1	-0.175798		>tr|Q9VJX7|Q9VJX7_DROME AT04835p OS=Drosophila melanogaster OX=7227 GN=Hsp60D PE=2 SV=1	5.0935e-17
>sp|P53501|ACT3_DROME Actin-57B OS=Drosophila melanogaster OX=7227 GN=Act57B PE=1 SV=1	-0.175798		>tr|Q9VCL4|Q9VCL4_DROME IP12025p OS=Drosophila melanogaster OX=7227 GN=Ugt303B1 PE=2 SV=2	-0.000385356
>sp|P53501|ACT3_DROME Actin-57B OS=Drosophila melanogaster OX=7227 GN=Act57B PE=1 SV=1	-0.175798		>sp|Q9U3Z7|NH2L1_DROME NHP2-like protein 1 homolog OS=Drosophila melanogaster OX=7227 GN=hoip PE=2 SV=1	-0.000787402
>tr|Q7KMP8|Q7KMP8_DROME 26S proteasome regulatory complex subunit p39A OS=Drosophila melanogaster OX=7227 GN=Rpn9 PE=1 SV=1	-0.175916		>sp|Q9U3Z7|NH2L1_DROME NHP2-like protein 1 homolog OS=Drosophila melanogaster OX=7227 GN=hoip PE=2 SV=1	-0.000787402
>tr|Q7KMP8|Q7KMP8_DROME 26S proteasome regulatory complex subunit p39A OS=Drosophila melanogaster OX=7227 GN=Rpn9 PE=1 SV=1	-0.175916		>sp|Q9U3Z7|NH2L1_DROME NHP2-like protein 1 homolog OS=Drosophila melanogaster OX=7227 GN=hoip PE=2 SV=1	-0.000787402
>tr|Q9Y119|Q9Y119_DROME BcDNA.GH08860 OS=Drosophila melanogaster OX=7227 GN=Tps1 PE=1 SV=1	-0.176391		>tr|Q8MLS2|Q8MLS2_DROME Ribose-5-phosphate isomerase, isoform B OS=Drosophila melanogaster OX=7227 GN=Rpi PE=1 SV=3	-0.00124481
>tr|Q9Y119|Q9Y119_DROME BcDNA.GH08860 OS=Drosophila melanogaster OX=7227 GN=Tps1 PE=1 SV=1	-0.176391		>tr|Q8MLS2|Q8MLS2_DROME Ribose-5-phosphate isomerase, isoform B OS=Drosophila melanogaster OX=7227 GN=Rpi PE=1 SV=3	-0.00124481
>tr|Q9Y119|Q9Y119_DROME BcDNA.GH08860 OS=Drosophila melanogaster OX=7227 GN=Tps1 PE=1 SV=1	-0.176391		>sp|Q9U4L6|TO401_DROME Mitochondrial import receptor subunit TOM40 homolog 1 OS=Drosophila melanogaster OX=7227 GN=Tom40 PE=2 SV=2	-0.00232558
>sp|Q9VVW1|A76A_DROME Accessory gland protein Acp76A OS=Drosophila melanogaster OX=7227 GN=Acp76A PE=2 SV=2	-0.176684		>sp|Q9U4L6|TO401_DROME Mitochondrial import receptor subunit TOM40 homolog 1 OS=Drosophila melanogaster OX=7227 GN=Tom40 PE=2 SV=2	-0.00232558
>tr|O77434|O77434_DROME EG:34F3.8 protein OS=Drosophila melanogaster OX=7227 GN=Sec22 PE=1 SV=2	-0.176777		>sp|Q9U4L6|TO401_DROME Mitochondrial import receptor subunit TOM40 homolog 1 OS=Drosophila melanogaster OX=7227 GN=Tom40 PE=2 SV=2	-0.00232558
>tr|O77434|O77434_DROME EG:34F3.8 protein OS=Drosophila melanogaster OX=7227 GN=Sec22 PE=1 SV=2	-0.176777		>tr|Q9VCC6|Q9VCC6_DROME GM05240p OS=Drosophila melanogaster OX=7227 GN=Dmel\CG6178 PE=1 SV=1	-0.00367647
>tr|Q9VT25|Q9VT25_DROME Peptidase S1 domain-containing protein OS=Drosophila melanogaster OX=7227 GN=Dmel\CG18180 PE=1 SV=1	-0.176894		>tr|Q9VCC6|Q9VCC6_DROME GM05240p OS=Drosophila melanogaster OX=7227 GN=Dmel\CG6178 PE=1 SV=1	-0.00367647
>tr|Q9VIQ8|Q9VIQ8_DROME Cytochrome c oxidase subunit 4, isoform A OS=Drosophila melanogaster OX=7227 GN=COX4 PE=1 SV=1	-0.177473		>tr|Q9VCC6|Q9VCC6_DROME GM05240p OS=Drosophila melanogaster OX=7227 GN=Dmel\CG6178 PE=1 SV=1	-0.00367647
>tr|Q9VLQ7|Q9VLQ7_DROME Serpin 28F OS=Drosophila melanogaster OX=7227 GN=Spn28F PE=3 SV=2	-0.1776		>tr|Q9W0L6|Q9W0L6_DROME GH22266p OS=Drosophila melanogaster OX=7227 GN=Dmel\CG13907 PE=1 SV=1	-0.00502451
>sp|Q7KML2|ACOX1_DROME Probable peroxisomal acyl-coenzyme A oxidase 1 OS=Drosophila melanogaster OX=7227 GN=CG5009 PE=1 SV=1	-0.177728		>tr|Q9W0L6|Q9W0L6_DROME GH22266p OS=Drosophila melanogaster OX=7227 GN=Dmel\CG13907 PE=1 SV=1	-0.00502451
>tr|Q9VFF0|Q9VFF0_DROME GH01077p OS=Drosophila melanogaster OX=7227 GN=UQCR-C1 PE=1 SV=2	-0.177872		>tr|Q9W0L6|Q9W0L6_DROME GH22266p OS=Drosophila melanogaster OX=7227 GN=Dmel\CG13907 PE=1 SV=1	-0.00502451
>tr|Q9VFF0|Q9VFF0_DROME GH01077p OS=Drosophila melanogaster OX=7227 GN=UQCR-C1 PE=1 SV=2	-0.177872		>tr|Q8SZM2|Q8SZM2_DROME RH04334p OS=Drosophila melanogaster OX=7227 GN=Vajk2 PE=1 SV=1	-0.00592593
>tr|Q9VFF0|Q9VFF0_DROME GH01077p OS=Drosophila melanogaster OX=7227 GN=UQCR-C1 PE=1 SV=2	-0.177872		>tr|Q8IMV2|Q8IMV2_DROME Pickpocket 22, isoform B OS=Drosophila melanogaster OX=7227 GN=ppk22 PE=3 SV=2	-0.00766488
>tr|Q9VA95|Q9VA95_DROME Trafficking protein particle complex subunit OS=Drosophila melanogaster OX=7227 GN=Bet5 PE=2 SV=1	-0.177931		>sp|Q8IQ56|TMM11_DROME Transmembrane protein 11 homolog, mitochondrial OS=Drosophila melanogaster OX=7227 GN=Pmi PE=1 SV=3	-0.00769231
>tr|Q9VGF1|Q9VGF1_DROME GH17980p OS=Drosophila melanogaster OX=7227 GN=Dmel\CG3397 PE=1 SV=1	-0.17807		>sp|Q8IQ56|TMM11_DROME Transmembrane protein 11 homolog, mitochondrial OS=Drosophila melanogaster OX=7227 GN=Pmi PE=1 SV=3	-0.00769231
>tr|Q9VVP9|Q9VVP9_DROME RE30433p OS=Drosophila melanogaster OX=7227 GN=Dmel\CG4306 PE=1 SV=1	-0.178182		>sp|Q8IQ56|TMM11_DROME Transmembrane protein 11 homolog, mitochondrial OS=Drosophila melanogaster OX=7227 GN=Pmi PE=1 SV=3	-0.00769231
>tr|Q7KK90|Q7KK90_DROME GH14654p OS=Drosophila melanogaster OX=7227 GN=GstE1 PE=1 SV=1	-0.178571		>tr|Q6NNV7|Q6NNV7_DROME RH03309p OS=Drosophila melanogaster OX=7227 GN=FOHSDR PE=1 SV=1	-0.00809717
>tr|Q9W227|Q9W227_DROME Peptidyl-prolyl cis-trans isomerase OS=Drosophila melanogaster OX=7227 GN=Dmel\CG2852 PE=1 SV=1	-0.179512		>tr|Q9W2U8|Q9W2U8_DROME Neb-cGP, isoform A OS=Drosophila melanogaster OX=7227 GN=Neb-cGP PE=1 SV=1	-0.00833333
>tr|Q9W227|Q9W227_DROME Peptidyl-prolyl cis-trans isomerase OS=Drosophila melanogaster OX=7227 GN=Dmel\CG2852 PE=1 SV=1	-0.179512		>tr|Q9W2U8|Q9W2U8_DROME Neb-cGP, isoform A OS=Drosophila melanogaster OX=7227 GN=Neb-cGP PE=1 SV=1	-0.00833333
>tr|E1JIZ5|E1JIZ5_DROME Malic enzyme OS=Drosophila melanogaster OX=7227 GN=Men-b PE=1 SV=1	-0.179871		>tr|Q9W2U8|Q9W2U8_DROME Neb-cGP, isoform A OS=Drosophila melanogaster OX=7227 GN=Neb-cGP PE=1 SV=1	-0.00833333
>tr|E1JIZ5|E1JIZ5_DROME Malic enzyme OS=Drosophila melanogaster OX=7227 GN=Men-b PE=1 SV=1	-0.179871		>tr|D0Z756|D0Z756_DROME MIP14966p OS=Drosophila melanogaster OX=7227 GN=CG14762-RA PE=1 SV=1	-0.00943775
>tr|Q9VD29|Q9VD29_DROME RE74312p OS=Drosophila melanogaster OX=7227 GN=Sar1 PE=1 SV=1	-0.180311		>tr|D0Z756|D0Z756_DROME MIP14966p OS=Drosophila melanogaster OX=7227 GN=CG14762-RA PE=1 SV=1	-0.00943775
>tr|Q24173|Q24173_DROME Beta subunit of type I geranylgeranyl transferase, isoform A OS=Drosophila melanogaster OX=7227 GN=betaggt-I PE=2 SV=1	-0.181266		>tr|D0Z756|D0Z756_DROME MIP14966p OS=Drosophila melanogaster OX=7227 GN=CG14762-RA PE=1 SV=1	-0.00943775
>tr|E1JHT6|E1JHT6_DROME Reticulon-like protein OS=Drosophila melanogaster OX=7227 GN=Rtnl1 PE=1 SV=1	-0.181713		>tr|Q9VGS9|Q9VGS9_DROME LD21102p OS=Drosophila melanogaster OX=7227 GN=Ugt35A1 PE=1 SV=1	-0.0122905
>sp|O76454|PHS_DROME Pterin-4-alpha-carbinolamine dehydratase OS=Drosophila melanogaster OX=7227 GN=Pcd PE=1 SV=2	-0.181771		>tr|Q9VGS9|Q9VGS9_DROME LD21102p OS=Drosophila melanogaster OX=7227 GN=Ugt35A1 PE=1 SV=1	-0.0122905
>sp|Q9U616|GCSH_DROME Glycine cleavage system H protein, mitochondrial OS=Drosophila melanogaster OX=7227 GN=ppl PE=2 SV=1	-0.181818		>tr|A0A0B4K623|A0A0B4K623_DROME Pugilist, isoform E OS=Drosophila melanogaster OX=7227 GN=pug PE=1 SV=1	-0.0126425
>tr|Q9W2M4|Q9W2M4_DROME Uncharacterized protein OS=Drosophila melanogaster OX=7227 GN=Dmel\CG10527 PE=1 SV=1	-0.182095		>tr|A0A0B4K623|A0A0B4K623_DROME Pugilist, isoform E OS=Drosophila melanogaster OX=7227 GN=pug PE=1 SV=1	-0.0126425
>tr|Q9W2M4|Q9W2M4_DROME Uncharacterized protein OS=Drosophila melanogaster OX=7227 GN=Dmel\CG10527 PE=1 SV=1	-0.182095		>tr|A0A0B4K623|A0A0B4K623_DROME Pugilist, isoform E OS=Drosophila melanogaster OX=7227 GN=pug PE=1 SV=1	-0.0126425
>tr|Q9W2M4|Q9W2M4_DROME Uncharacterized protein OS=Drosophila melanogaster OX=7227 GN=Dmel\CG10527 PE=1 SV=1	-0.182095		>tr|Q9W2X6|Q9W2X6_DROME ATP synthase, delta subunit, isoform A OS=Drosophila melanogaster OX=7227 GN=ATPsyndelta PE=1 SV=1	-0.0127389
>sp|Q9W385|FRDA_DROME Frataxin homolog, mitochondrial OS=Drosophila melanogaster OX=7227 GN=fh PE=1 SV=1	-0.182105		>tr|Q9W2X6|Q9W2X6_DROME ATP synthase, delta subunit, isoform A OS=Drosophila melanogaster OX=7227 GN=ATPsyndelta PE=1 SV=1	-0.0127389
>sp|P15372|ARRA_DROME Phosrestin-2 OS=Drosophila melanogaster OX=7227 GN=Arr1 PE=1 SV=1	-0.182418		>tr|Q9W2X6|Q9W2X6_DROME ATP synthase, delta subunit, isoform A OS=Drosophila melanogaster OX=7227 GN=ATPsyndelta PE=1 SV=1	-0.0127389
>sp|P29742|CLH_DROME Clathrin heavy chain OS=Drosophila melanogaster OX=7227 GN=Chc PE=1 SV=1	-0.18242		>tr|Q8T0K1|Q8T0K1_DROME GH26184p OS=Drosophila melanogaster OX=7227 GN=Dmel\CG2010 PE=2 SV=1	-0.0136986
>sp|P29742|CLH_DROME Clathrin heavy chain OS=Drosophila melanogaster OX=7227 GN=Chc PE=1 SV=1	-0.18242		>tr|Q8T0K1|Q8T0K1_DROME GH26184p OS=Drosophila melanogaster OX=7227 GN=FipoQ PE=2 SV=1	-0.0136986
>sp|P29742|CLH_DROME Clathrin heavy chain OS=Drosophila melanogaster OX=7227 GN=Chc PE=1 SV=1	-0.18242		>tr|Q8T0K1|Q8T0K1_DROME GH26184p OS=Drosophila melanogaster OX=7227 GN=FipoQ PE=2 SV=1	-0.0136986
>tr|M9PGX9|M9PGX9_DROME Anoctamin OS=Drosophila melanogaster OX=7227 GN=Dmel\CG10353 PE=3 SV=1	-0.182725		>tr|Q9VLP2|Q9VLP2_DROME GEO08076p1 OS=Drosophila melanogaster OX=7227 GN=Dmel\CG7781 PE=1 SV=1	-0.0142857
>tr|A0A0B4KH94|A0A0B4KH94_DROME Fasciclin 1, isoform G OS=Drosophila melanogaster OX=7227 GN=Fas1 PE=1 SV=1	-0.182905		>tr|Q7K485|Q7K485_DROME CathD, isoform A OS=Drosophila melanogaster OX=7227 GN=cathD PE=1 SV=1	-0.0142857
>tr|A0A0B4KH94|A0A0B4KH94_DROME Fasciclin 1, isoform G OS=Drosophila melanogaster OX=7227 GN=Fas1 PE=1 SV=1	-0.182905		>tr|Q7K485|Q7K485_DROME CathD, isoform A OS=Drosophila melanogaster OX=7227 GN=cathD PE=1 SV=1	-0.0142857
>tr|Q9VXZ8|Q9VXZ8_DROME BcDNA.GH02901 OS=Drosophila melanogaster OX=7227 GN=pdgy PE=1 SV=2	-0.183417		>tr|Q7K485|Q7K485_DROME CathD, isoform A OS=Drosophila melanogaster OX=7227 GN=cathD PE=1 SV=1	-0.0142857
>tr|Q9VXZ8|Q9VXZ8_DROME BcDNA.GH02901 OS=Drosophila melanogaster OX=7227 GN=pdgy PE=1 SV=2	-0.183417		>tr|Q9VLP2|Q9VLP2_DROME GEO08076p1 OS=Drosophila melanogaster OX=7227 GN=Dmel\CG7781 PE=1 SV=1	-0.0142857
>tr|Q9VMX7|Q9VMX7_DROME Jonah 25Bi OS=Drosophila melanogaster OX=7227 GN=Jon25Bi PE=1 SV=1	-0.184211		>tr|Q9W423|Q9W423_DROME LD18904p OS=Drosophila melanogaster OX=7227 GN=schlank PE=1 SV=2	-0.015
>tr|Q9VMX7|Q9VMX7_DROME Jonah 25Bi OS=Drosophila melanogaster OX=7227 GN=Jon25Bi PE=1 SV=1	-0.184211		>tr|Q9Y171|Q9Y171_DROME BcDNA.GH02220 OS=Drosophila melanogaster OX=7227 GN=OXA1L PE=2 SV=1	-0.0154195
>tr|Q9VF15|Q9VF15_DROME GEO09476p1 OS=Drosophila melanogaster OX=7227 GN=glob1 PE=1 SV=1	-0.184314		>tr|Q9Y171|Q9Y171_DROME BcDNA.GH02220 OS=Drosophila melanogaster OX=7227 GN=OXA1L PE=2 SV=1	-0.0154195
>sp|O76206|RIFK_DROME Putative riboflavin kinase OS=Drosophila melanogaster OX=7227 GN=anon-84Ea PE=2 SV=1	-0.184314		>tr|Q9Y171|Q9Y171_DROME BcDNA.GH02220 OS=Drosophila melanogaster OX=7227 GN=OXA1L PE=2 SV=1	-0.0154195
>tr|Q9VF15|Q9VF15_DROME GEO09476p1 OS=Drosophila melanogaster OX=7227 GN=glob1 PE=1 SV=1	-0.184314		>tr|Q9VFP6|Q9VFP6_DROME Inositol polyphosphate 1-phosphatase OS=Drosophila melanogaster OX=7227 GN=Ipp PE=1 SV=1	-0.016
>tr|Q9VF15|Q9VF15_DROME GEO09476p1 OS=Drosophila melanogaster OX=7227 GN=glob1 PE=1 SV=1	-0.184314		>tr|Q9VFP6|Q9VFP6_DROME Inositol polyphosphate 1-phosphatase OS=Drosophila melanogaster OX=7227 GN=Ipp PE=1 SV=1	-0.016
>sp|Q24372|LACH_DROME Lachesin OS=Drosophila melanogaster OX=7227 GN=Lac PE=1 SV=2	-0.184401		>tr|Q0KHQ2|Q0KHQ2_DROME Uncharacterized protein, isoform C OS=Drosophila melanogaster OX=7227 GN=CG1819 PE=4 SV=1	-0.0160741
>sp|Q24372|LACH_DROME Lachesin OS=Drosophila melanogaster OX=7227 GN=Lac PE=1 SV=2	-0.184401		>tr|Q0KHQ2|Q0KHQ2_DROME Uncharacterized protein, isoform C OS=Drosophila melanogaster OX=7227 GN=CG1819 PE=4 SV=1	-0.0160741
>sp|Q24372|LACH_DROME Lachesin OS=Drosophila melanogaster OX=7227 GN=Lac PE=1 SV=2	-0.184401		>tr|Q9VV47|Q9VV47_DROME GH15220p OS=Drosophila melanogaster OX=7227 GN=Dmel\CG4842 PE=1 SV=2	-0.0162162
>tr|Q9V455|Q9V455_DROME Importin subunit alpha OS=Drosophila melanogaster OX=7227 GN=Kap-alpha3 PE=1 SV=1	-0.185019		>tr|A1ZA77|A1ZA77_DROME FI07302p OS=Drosophila melanogaster OX=7227 GN=Dmel\CG8320 PE=1 SV=1	-0.0172414
>tr|Q9V455|Q9V455_DROME Importin subunit alpha OS=Drosophila melanogaster OX=7227 GN=Kap-alpha3 PE=1 SV=1	-0.185019		>tr|A1ZA77|A1ZA77_DROME FI07302p OS=Drosophila melanogaster OX=7227 GN=Dmel\CG8320 PE=1 SV=1	-0.0172414
>tr|Q9V455|Q9V455_DROME Importin subunit alpha OS=Drosophila melanogaster OX=7227 GN=Kap-alpha3 PE=1 SV=1	-0.185019		>tr|A1ZA77|A1ZA77_DROME FI07302p OS=Drosophila melanogaster OX=7227 GN=Dmel\CG8320 PE=1 SV=1	-0.0172414
>sp|Q9VAJ4|OB99A_DROME General odorant-binding protein 99a OS=Drosophila melanogaster OX=7227 GN=Obp99a PE=2 SV=2	-0.185211		>tr|Q9W077|Q9W077_DROME Cuticular protein 62Bc, isoform A OS=Drosophila melanogaster OX=7227 GN=Cpr62Bc PE=1 SV=1	-0.0177778
>tr|Q9VM12|Q9VM12_DROME MIP26555p1 OS=Drosophila melanogaster OX=7227 GN=Dmel\CG5958 PE=1 SV=1	-0.185374		>tr|Q9W077|Q9W077_DROME Cuticular protein 62Bc, isoform A OS=Drosophila melanogaster OX=7227 GN=Cpr62Bc PE=1 SV=1	-0.0177778
>sp|P26308|GBB1_DROME Guanine nucleotide-binding protein subunit beta-1 OS=Drosophila melanogaster OX=7227 GN=Gbeta13F PE=1 SV=1	-0.185882		>tr|Q9VA41|Q9VA41_DROME GEO08227p1 OS=Drosophila melanogaster OX=7227 GN=Npc2h PE=1 SV=1	-0.0178344
>tr|Q9W2L6|Q9W2L6_DROME RH02475p OS=Drosophila melanogaster OX=7227 GN=Dmel\CG9394 PE=1 SV=1	-0.186745		>tr|Q9VA41|Q9VA41_DROME GEO08227p1 OS=Drosophila melanogaster OX=7227 GN=Npc2h PE=1 SV=1	-0.0178344
>tr|Q9W2L6|Q9W2L6_DROME RH02475p OS=Drosophila melanogaster OX=7227 GN=Dmel\CG9394 PE=1 SV=1	-0.186745		>tr|Q9W5W8|Q9W5W8_DROME RE22677p OS=Drosophila melanogaster OX=7227 GN=Dmel\CG9577 PE=1 SV=2	-0.0179487
>tr|Q9W2L6|Q9W2L6_DROME RH02475p OS=Drosophila melanogaster OX=7227 GN=Dmel\CG9394 PE=1 SV=1	-0.186745		>tr|Q9W5W8|Q9W5W8_DROME RE22677p OS=Drosophila melanogaster OX=7227 GN=Dmel\CG9577 PE=1 SV=2	-0.0179487
>tr|Q9VPE8|Q9VPE8_DROME GH18546p OS=Drosophila melanogaster OX=7227 GN=Dmel\CG5955 PE=2 SV=1	-0.186921		>tr|Q9W5W8|Q9W5W8_DROME RE22677p OS=Drosophila melanogaster OX=7227 GN=Dmel\CG9577 PE=1 SV=2	-0.0179487
>sp|Q9VSY6|SERB_DROME Phosphoserine phosphatase OS=Drosophila melanogaster OX=7227 GN=aay PE=2 SV=1	-0.187407		>tr|Q7K8X7|Q7K8X7_DROME Glutathione S transferase E9 OS=Drosophila melanogaster OX=7227 GN=GstE9 PE=1 SV=1	-0.0180995
>sp|Q9V3S0|CP4G1_DROME Cytochrome P450 4g1 OS=Drosophila melanogaster OX=7227 GN=Cyp4g1 PE=2 SV=1	-0.18795		>tr|Q7K8X7|Q7K8X7_DROME Glutathione S transferase E9 OS=Drosophila melanogaster OX=7227 GN=GstE9 PE=1 SV=1	-0.0180995
>sp|Q9V3S0|CP4G1_DROME Cytochrome P450 4g1 OS=Drosophila melanogaster OX=7227 GN=Cyp4g1 PE=2 SV=1	-0.18795		>tr|Q7K8X7|Q7K8X7_DROME Glutathione S transferase E9 OS=Drosophila melanogaster OX=7227 GN=GstE9 PE=1 SV=1	-0.0180995
>sp|Q9V3S0|CP4G1_DROME Cytochrome P450 4g1 OS=Drosophila melanogaster OX=7227 GN=Cyp4g1 PE=2 SV=1	-0.18795		>tr|Q8IPU0|Q8IPU0_DROME Uncharacterized protein, isoform B OS=Drosophila melanogaster OX=7227 GN=Dmel\CG10512 PE=1 SV=1	-0.0186352
>tr|Q9VF53|Q9VF53_DROME Aldehyde oxidase 1 OS=Drosophila melanogaster OX=7227 GN=AOX1 PE=1 SV=1	-0.187981		>tr|Q8IPU0|Q8IPU0_DROME Uncharacterized protein, isoform B OS=Drosophila melanogaster OX=7227 GN=Dmel\CG10512 PE=1 SV=1	-0.0186352
>tr|Q9VF53|Q9VF53_DROME Aldehyde oxidase 1 OS=Drosophila melanogaster OX=7227 GN=AOX1 PE=1 SV=1	-0.187981		>tr|Q8IPU0|Q8IPU0_DROME Uncharacterized protein, isoform B OS=Drosophila melanogaster OX=7227 GN=Dmel\CG10512 PE=1 SV=1	-0.0186352
>tr|M9PDI1|M9PDI1_DROME Voltage-dependent L-type calcium channel subunit alpha OS=Drosophila melanogaster OX=7227 GN=Ca-alpha1D PE=3 SV=1	-0.18806		>sp|Q9VCA9|SPCS3_DROME Signal peptidase complex subunit 3 OS=Drosophila melanogaster OX=7227 GN=Spase22-23 PE=2 SV=1	-0.0189944
>tr|Q8SZN1|Q8SZN1_DROME GEO08217p1 OS=Drosophila melanogaster OX=7227 GN=Dmel\CG31313 PE=1 SV=1	-0.189516		>sp|Q9VCA9|SPCS3_DROME Signal peptidase complex subunit 3 OS=Drosophila melanogaster OX=7227 GN=Spase22-23 PE=2 SV=1	-0.0189944
>sp|Q9VXT7|ASGL1_DROME Probable isoaspartyl peptidase/L-asparaginase CG7860 OS=Drosophila melanogaster OX=7227 GN=CG7860 PE=2 SV=1	-0.189759		>tr|Q9VJX8|Q9VJX8_DROME Very-long-chain (3R)-3-hydroxyacyl-CoA dehydratase OS=Drosophila melanogaster OX=7227 GN=Hacd2 PE=1 SV=1	-0.0191375
>tr|M9PDU4|M9PDU4_DROME Acyl carrier protein OS=Drosophila melanogaster OX=7227 GN=ND-ACP PE=1 SV=1	-0.190055		>tr|Q9VAJ9|Q9VAJ9_DROME SD09259p OS=Drosophila melanogaster OX=7227 GN=Dmel\CG1907 PE=1 SV=1	-0.0211356
>tr|M9PDU4|M9PDU4_DROME Acyl carrier protein OS=Drosophila melanogaster OX=7227 GN=ND-ACP PE=1 SV=1	-0.190055		>tr|Q9VAJ9|Q9VAJ9_DROME SD09259p OS=Drosophila melanogaster OX=7227 GN=Dmel\CG1907 PE=1 SV=1	-0.0211356
>tr|M9PDU4|M9PDU4_DROME Acyl carrier protein OS=Drosophila melanogaster OX=7227 GN=ND-ACP PE=1 SV=1	-0.190055		>tr|Q9VAJ9|Q9VAJ9_DROME SD09259p OS=Drosophila melanogaster OX=7227 GN=Dmel\CG1907 PE=1 SV=1	-0.0211356
>tr|Q7KN97|Q7KN97_DROME Pyruvate carboxylase OS=Drosophila melanogaster OX=7227 GN=PCB PE=1 SV=1	-0.190262		>sp|Q9VKY2|CAND1_DROME Cullin-associated NEDD8-dissociated protein 1 OS=Drosophila melanogaster OX=7227 GN=Cand1 PE=2 SV=1	-0.0213141
>tr|Q7KN97|Q7KN97_DROME Pyruvate carboxylase OS=Drosophila melanogaster OX=7227 GN=PCB PE=1 SV=1	-0.190262		>sp|Q9VKY2|CAND1_DROME Cullin-associated NEDD8-dissociated protein 1 OS=Drosophila melanogaster OX=7227 GN=Cand1 PE=2 SV=1	-0.0213141
>tr|Q7KN97|Q7KN97_DROME Pyruvate carboxylase OS=Drosophila melanogaster OX=7227 GN=PCB PE=1 SV=1	-0.190262		>sp|Q9VKY2|CAND1_DROME Cullin-associated NEDD8-dissociated protein 1 OS=Drosophila melanogaster OX=7227 GN=Cand1 PE=2 SV=1	-0.0213141
>sp|Q9VH07|RUVB1_DROME RuvB-like helicase 1 OS=Drosophila melanogaster OX=7227 GN=pont PE=1 SV=1	-0.191009		>tr|Q9VL69|Q9VL69_DROME LD05267p OS=Drosophila melanogaster OX=7227 GN=CK01296 PE=1 SV=1	-0.0215789
>sp|Q9VH07|RUVB1_DROME RuvB-like helicase 1 OS=Drosophila melanogaster OX=7227 GN=pont PE=1 SV=1	-0.191009		>tr|Q9VL69|Q9VL69_DROME LD05267p OS=Drosophila melanogaster OX=7227 GN=CK01296 PE=1 SV=1	-0.0215789
>sp|P02574|ACT4_DROME Actin, larval muscle OS=Drosophila melanogaster OX=7227 GN=Act79B PE=1 SV=2	-0.192287		>tr|Q9VL69|Q9VL69_DROME LD05267p OS=Drosophila melanogaster OX=7227 GN=CK01296 PE=1 SV=1	-0.0215789
>sp|P02574|ACT4_DROME Actin, larval muscle OS=Drosophila melanogaster OX=7227 GN=Act79B PE=1 SV=2	-0.192287		>tr|Q9W1F8|Q9W1F8_DROME GEO08248p1 OS=Drosophila melanogaster OX=7227 GN=Orcokinin PE=2 SV=2	-0.0218045
>sp|P02574|ACT4_DROME Actin, larval muscle OS=Drosophila melanogaster OX=7227 GN=Act79B PE=1 SV=2	-0.192287		>tr|Q7K0F7|Q7K0F7_DROME Carbonyl reductase, isoform A OS=Drosophila melanogaster OX=7227 GN=Dmel\CG11200 PE=1 SV=1	-0.0233803
>sp|P10987|ACT1_DROME Actin-5C OS=Drosophila melanogaster OX=7227 GN=Act5C PE=1 SV=4	-0.192553		>tr|Q7K0F7|Q7K0F7_DROME Carbonyl reductase, isoform A OS=Drosophila melanogaster OX=7227 GN=Dmel\CG11200 PE=1 SV=1	-0.0233803
>sp|P10987|ACT1_DROME Actin-5C OS=Drosophila melanogaster OX=7227 GN=Act5C PE=1 SV=4	-0.192553		>sp|O46200|A63F_DROME Accessory gland protein Acp63F OS=Drosophila melanogaster OX=7227 GN=Acp63F PE=2 SV=2	-0.0234568
>sp|O18391|KRAK_DROME Probable serine hydrolase OS=Drosophila melanogaster OX=7227 GN=kraken PE=2 SV=1	-0.193656		>tr|C0PDF4|C0PDF4_DROME MIP06482p OS=Drosophila melanogaster OX=7227 GN=CG18815-RA PE=1 SV=1	-0.0235294
>sp|Q9VVU5|CSN1_DROME COP9 signalosome complex subunit 1b OS=Drosophila melanogaster OX=7227 GN=CSN1b PE=2 SV=1	-0.193905		>tr|C0PDF4|C0PDF4_DROME MIP06482p OS=Drosophila melanogaster OX=7227 GN=CG18815-RA PE=1 SV=1	-0.0235294
>sp|Q9VN95|ENOPH_DROME Enolase-phosphatase E1 OS=Drosophila melanogaster OX=7227 GN=CG12173 PE=2 SV=2	-0.194141		>tr|C0PDF4|C0PDF4_DROME MIP06482p OS=Drosophila melanogaster OX=7227 GN=CG18815-RA PE=1 SV=1	-0.0235294
>sp|Q9VN95|ENOPH_DROME Enolase-phosphatase E1 OS=Drosophila melanogaster OX=7227 GN=CG12173 PE=2 SV=2	-0.194141		>tr|Q494I1|Q494I1_DROME GH08786p OS=Drosophila melanogaster OX=7227 GN=Dmel\CG2747 PE=1 SV=1	-0.023584
>sp|Q9VN95|ENOPH_DROME Enolase-phosphatase E1 OS=Drosophila melanogaster OX=7227 GN=CG12173 PE=2 SV=2	-0.194141		>sp|Q01637|UMPS_DROME Uridine 5'-monophosphate synthase OS=Drosophila melanogaster OX=7227 GN=r-l PE=2 SV=2	-0.0237323
>tr|Q9VT23|Q9VT23_DROME Peptidase S1 domain-containing protein OS=Drosophila melanogaster OX=7227 GN=SP170 PE=3 SV=1	-0.194208		>sp|Q9VXJ0|DHB4_DROME Peroxisomal multifunctional enzyme type 2 OS=Drosophila melanogaster OX=7227 GN=Mfe2 PE=1 SV=1	-0.026087
>tr|Q9VT23|Q9VT23_DROME Peptidase S1 domain-containing protein OS=Drosophila melanogaster OX=7227 GN=SP170 PE=3 SV=1	-0.194208		>sp|Q9VXJ0|DHB4_DROME Peroxisomal multifunctional enzyme type 2 OS=Drosophila melanogaster OX=7227 GN=Mfe2 PE=1 SV=1	-0.026087
>sp|P22465|ANX10_DROME Annexin B10 OS=Drosophila melanogaster OX=7227 GN=AnxB10 PE=2 SV=3	-0.194704		>sp|Q9VXJ0|DHB4_DROME Peroxisomal multifunctional enzyme type 2 OS=Drosophila melanogaster OX=7227 GN=Mfe2 PE=1 SV=1	-0.026087
>sp|P22465|ANX10_DROME Annexin B10 OS=Drosophila melanogaster OX=7227 GN=AnxB10 PE=2 SV=3	-0.194704		>tr|Q8IRJ9|Q8IRJ9_DROME Glycerol kinase 1, isoform B OS=Drosophila melanogaster OX=7227 GN=Gk1 PE=1 SV=1	-0.0261603
>sp|P22465|ANX10_DROME Annexin B10 OS=Drosophila melanogaster OX=7227 GN=AnxB10 PE=2 SV=3	-0.194704		>tr|Q9V470|Q9V470_DROME Succinate--CoA ligase [GDP-forming] subunit beta, mitochondrial OS=Drosophila melanogaster OX=7227 GN=ScsbetaG PE=1 SV=1	-0.0266827
>tr|Q7K490|Q7K490_DROME SD03973p OS=Drosophila melanogaster OX=7227 GN=Dmel\CG11807 PE=2 SV=1	-0.194705		>tr|Q9V470|Q9V470_DROME Succinate--CoA ligase [GDP-forming] subunit beta, mitochondrial OS=Drosophila melanogaster OX=7227 GN=ScsbetaG PE=1 SV=1	-0.0266827
>tr|Q9VWB4|Q9VWB4_DROME Serpin 77Bb OS=Drosophila melanogaster OX=7227 GN=Spn77Bb PE=1 SV=3	-0.194751		>tr|Q9V470|Q9V470_DROME Succinate--CoA ligase [GDP-forming] subunit beta, mitochondrial OS=Drosophila melanogaster OX=7227 GN=ScsbetaG PE=1 SV=1	-0.0266827
>tr|Q9VWB4|Q9VWB4_DROME Serpin 77Bb OS=Drosophila melanogaster OX=7227 GN=Spn77Bb PE=1 SV=3	-0.194751		>sp|O18373|SPS1_DROME Selenide, water dikinase OS=Drosophila melanogaster OX=7227 GN=SelD PE=2 SV=1	-0.0268844
>tr|Q9VZI8|Q9VZI8_DROME Fumarylacetoacetase OS=Drosophila melanogaster OX=7227 GN=Faa PE=1 SV=2	-0.196403		sp|O18373|SPS1_DROME Inactive selenide, water dikinase-like protein OS=Drosophila melanogaster OX=7227 GN=SelD PE=2 SV=1	-0.0268844
>tr|Q9I7K3|Q9I7K3_DROME GH04054p OS=Drosophila melanogaster OX=7227 GN=Dmel\CG6465 PE=1 SV=1	-0.196758		>sp|O18373|SPS1_DROME Inactive selenide, water dikinase-like protein OS=Drosophila melanogaster OX=7227 GN=SelD PE=2 SV=1	-0.0268844
>tr|Q7K3W2|Q7K3W2_DROME GH09295p OS=Drosophila melanogaster OX=7227 GN=CG8728-RA PE=1 SV=1	-0.196763		>tr|Q8IQ80|Q8IQ80_DROME GH06117p OS=Drosophila melanogaster OX=7227 GN=pst PE=2 SV=2	-0.0272984
>tr|Q7K3W2|Q7K3W2_DROME GH09295p OS=Drosophila melanogaster OX=7227 GN=CG8728-RA PE=1 SV=1	-0.196763		>tr|Q8IQ80|Q8IQ80_DROME GH06117p OS=Drosophila melanogaster OX=7227 GN=pst PE=2 SV=2	-0.0272984
>tr|Q7K3W2|Q7K3W2_DROME GH09295p OS=Drosophila melanogaster OX=7227 GN=CG8728-RA PE=1 SV=1	-0.196763		>tr|Q8IQ80|Q8IQ80_DROME GH06117p OS=Drosophila melanogaster OX=7227 GN=pst PE=2 SV=2	-0.0272984
>tr|Q9VEQ0|Q9VEQ0_DROME LD23605p OS=Drosophila melanogaster OX=7227 GN=Dmel\CG3534 PE=1 SV=1	-0.197283		>tr|Q4V551|Q4V551_DROME IP13758p OS=Drosophila melanogaster OX=7227 GN=Dmel\CG7907 PE=2 SV=1	-0.0280212
>tr|Q9VEQ0|Q9VEQ0_DROME LD23605p OS=Drosophila melanogaster OX=7227 GN=Dmel\CG3534 PE=1 SV=1	-0.197283		>tr|Q500X4|Q500X4_DROME AT20029p OS=Drosophila melanogaster OX=7227 GN=S-Lap7 PE=1 SV=1	-0.0280835
>sp|Q9NB04|PATJ_DROME Patj homolog OS=Drosophila melanogaster OX=7227 GN=Patj PE=1 SV=2	-0.197359		>tr|Q500X4|Q500X4_DROME AT20029p OS=Drosophila melanogaster OX=7227 GN=S-Lap7 PE=1 SV=1	-0.0280835
>sp|Q9NB04|PATJ_DROME Patj homolog OS=Drosophila melanogaster OX=7227 GN=Patj PE=1 SV=2	-0.197359		>sp|Q0E8C8|SP77B_DROME Serine protease inhibitor 77Ba OS=Drosophila melanogaster OX=7227 GN=Spn77Ba PE=2 SV=1	-0.0284444
>tr|Q9VF86|Q9VF86_DROME GH07590p OS=Drosophila melanogaster OX=7227 GN=Dmel\CG6218 PE=1 SV=1	-0.198276		>tr|Q9VI57|Q9VI57_DROME Dephospho-CoA kinase OS=Drosophila melanogaster OX=7227 GN=Dpck PE=2 SV=1	-0.0288136
>tr|Q9VF86|Q9VF86_DROME GH07590p OS=Drosophila melanogaster OX=7227 GN=Dmel\CG6218 PE=1 SV=1	-0.198276		>tr|Q9VI57|Q9VI57_DROME Dephospho-CoA kinase OS=Drosophila melanogaster OX=7227 GN=Dpck PE=2 SV=1	-0.0288136
>tr|Q9VCR0|Q9VCR0_DROME Uncharacterized protein, isoform A OS=Drosophila melanogaster OX=7227 GN=Dmel\CG17109 PE=1 SV=1	-0.19875		>tr|Q24253|Q24253_DROME AP complex subunit beta OS=Drosophila melanogaster OX=7227 GN=AP-1-2beta PE=1 SV=1	-0.0295331
>tr|Q7K4Q9|Q7K4Q9_DROME 3-hydroxy-3-methylglutaryl coenzyme A synthase OS=Drosophila melanogaster OX=7227 GN=Hmgs PE=1 SV=1	-0.198925		>tr|Q24253|Q24253_DROME AP complex subunit beta OS=Drosophila melanogaster OX=7227 GN=AP-1-2beta PE=1 SV=1	-0.0295331
>tr|Q7K4Q9|Q7K4Q9_DROME 3-hydroxy-3-methylglutaryl coenzyme A synthase OS=Drosophila melanogaster OX=7227 GN=Hmgs PE=1 SV=1	-0.198925		>tr|Q24253|Q24253_DROME AP complex subunit beta OS=Drosophila melanogaster OX=7227 GN=AP-1-2beta PE=1 SV=1	-0.0295331
>tr|Q9VRP4|Q9VRP4_DROME Bifunctional phosphopantetheine adenylyltransferase - Dephospho-CoA kinase OS=Drosophila melanogaster OX=7227 GN=Ppat-Dpck PE=1 SV=2	-0.199035		>tr|Q9VX14|Q9VX14_DROME RH64870p OS=Drosophila melanogaster OX=7227 GN=Ucp4A PE=1 SV=1	-0.03
>tr|Q9VJ19|Q9VJ19_DROME RE25263p OS=Drosophila melanogaster OX=7227 GN=RpL30 PE=1 SV=1	-0.2		>tr|Q9VQG0|Q9VQG0_DROME LD21546p OS=Drosophila melanogaster OX=7227 GN=Tnpo-SR PE=2 SV=2	-0.0302575
>tr|Q9VJ19|Q9VJ19_DROME RE25263p OS=Drosophila melanogaster OX=7227 GN=RpL30 PE=1 SV=1	-0.2		>tr|X2JDZ6|X2JDZ6_DROME Phospholipid-transporting ATPase OS=Drosophila melanogaster OX=7227 GN=DmCG31729 PE=1 SV=1	-0.0304833
>sp|P02572|ACT2_DROME Actin-42A OS=Drosophila melanogaster OX=7227 GN=Act42A PE=1 SV=3	-0.200266		>tr|A0A0B4KGG9|A0A0B4KGG9_DROME C-terminal binding protein, isoform F OS=Drosophila melanogaster OX=7227 GN=CtBP PE=1 SV=1	-0.0318538
>tr|Q9VYA1|Q9VYA1_DROME RE18811p OS=Drosophila melanogaster OX=7227 GN=Dmel\CG12177 PE=2 SV=1	-0.200276		>tr|A0A0B4KGG9|A0A0B4KGG9_DROME C-terminal binding protein, isoform F OS=Drosophila melanogaster OX=7227 GN=CtBP PE=1 SV=1	-0.0318538
>tr|Q7JVK6|Q7JVK6_DROME GM27569p OS=Drosophila melanogaster OX=7227 GN=trsn PE=1 SV=1	-0.200851		>tr|Q9VNF5|Q9VNF5_DROME 3-oxoacyl-[acyl-carrier-protein] synthase OS=Drosophila melanogaster OX=7227 GN=anon-WO0118547.367 PE=1 SV=1	-0.0319635
>tr|A1ZAA5|A1ZAA5_DROME Glutamate oxaloacetate transaminase 1, isoform B OS=Drosophila melanogaster OX=7227 GN=Got1 PE=1 SV=1	-0.201144		>tr|Q9VNF5|Q9VNF5_DROME 3-oxoacyl-[acyl-carrier-protein] synthase OS=Drosophila melanogaster OX=7227 GN=anon-WO0118547.367 PE=1 SV=1	-0.0319635
>tr|A1ZAA5|A1ZAA5_DROME Glutamate oxaloacetate transaminase 1, isoform B OS=Drosophila melanogaster OX=7227 GN=Got1 PE=1 SV=1	-0.201144		>tr|Q9VYL5|Q9VYL5_DROME GH19726p OS=Drosophila melanogaster OX=7227 GN=Dmel\CG1824 PE=1 SV=1	-0.0321945
>tr|A1ZAA5|A1ZAA5_DROME Glutamate oxaloacetate transaminase 1, isoform B OS=Drosophila melanogaster OX=7227 GN=Got1 PE=1 SV=1	-0.201144		>tr|Q9VYL5|Q9VYL5_DROME GH19726p OS=Drosophila melanogaster OX=7227 GN=Dmel\CG1824 PE=1 SV=1	-0.0321945
>tr|R9PY51|R9PY51_DROME Uncharacterized protein OS=Drosophila melanogaster OX=7227 GN=CG4588 PE=4 SV=1	-0.201942		>sp|Q9XZU1|XPO2_DROME Exportin-2 OS=Drosophila melanogaster OX=7227 GN=Cse1 PE=2 SV=2	-0.0322051
>sp|P32392|ARP3_DROME Actin-related protein 3 OS=Drosophila melanogaster OX=7227 GN=Arp3 PE=2 SV=3	-0.202632		>sp|Q9XZU1|XPO2_DROME Exportin-2 OS=Drosophila melanogaster OX=7227 GN=Cse1 PE=2 SV=2	-0.0322051
>tr|Q9VH77|Q9VH77_DROME Mannose-6-phosphate isomerase OS=Drosophila melanogaster OX=7227 GN=Mpi PE=1 SV=1	-0.202778		>sp|Q9VN50|EI3F1_DROME Eukaryotic translation initiation factor 3 subunit F-1 OS=Drosophila melanogaster OX=7227 GN=eIF3f1 PE=2 SV=1	-0.0332143
>sp|Q9VYA0|NADE_DROME Glutamine-dependent NAD(+) synthetase OS=Drosophila melanogaster OX=7227 GN=Nadsyn PE=1 SV=1	-0.202922		>sp|Q9VN50|EI3F1_DROME Eukaryotic translation initiation factor 3 subunit F-1 OS=Drosophila melanogaster OX=7227 GN=eIF3f1 PE=2 SV=1	-0.0332143
>sp|Q27601|PUR1_DROME Amidophosphoribosyltransferase OS=Drosophila melanogaster OX=7227 GN=Prat PE=1 SV=2	-0.20293		>sp|Q9VN50|EI3F1_DROME Eukaryotic translation initiation factor 3 subunit F-1 OS=Drosophila melanogaster OX=7227 GN=eIF3f1 PE=2 SV=1	-0.0332143
>tr|Q9VH72|Q9VH72_DROME TA01656p1 OS=Drosophila melanogaster OX=7227 GN=BVR PE=1 SV=1	-0.202941		>tr|Q9VGT0|Q9VGT0_DROME UDP-glucuronosyltransferase OS=Drosophila melanogaster OX=7227 GN=Ugt35B1 PE=2 SV=1	-0.0333333
>tr|Q9VH72|Q9VH72_DROME TA01656p1 OS=Drosophila melanogaster OX=7227 GN=BVR PE=1 SV=1	-0.202941		>tr|Q9VGT0|Q9VGT0_DROME UDP-glucuronosyltransferase OS=Drosophila melanogaster OX=7227 GN=Ugt35B1 PE=2 SV=1	-0.0333333
>tr|Q9VH72|Q9VH72_DROME TA01656p1 OS=Drosophila melanogaster OX=7227 GN=BVR PE=1 SV=1	-0.202941		>sp|Q9W1G0|TALDO_DROME Probable transaldolase OS=Drosophila melanogaster OX=7227 GN=Taldo PE=2 SV=2	-0.034139
>sp|Q7JVI3|EIF3M_DROME Eukaryotic translation initiation factor 3 subunit M OS=Drosophila melanogaster OX=7227 GN=eIF3m PE=2 SV=1	-0.203101		>sp|Q9W1G0|TALDO_DROME Probable transaldolase OS=Drosophila melanogaster OX=7227 GN=Taldo PE=2 SV=2	-0.034139
>sp|P40301|PSA2_DROME Proteasome subunit alpha type-2 OS=Drosophila melanogaster OX=7227 GN=Prosalpha2 PE=1 SV=1	-0.203419		>sp|Q9W1G0|TALDO_DROME Probable transaldolase OS=Drosophila melanogaster OX=7227 GN=Taldo PE=2 SV=2	-0.034139
>tr|Q9VDP9|Q9VDP9_DROME S-formylglutathione hydrolase OS=Drosophila melanogaster OX=7227 GN=Dmel\CG4390 PE=1 SV=1	-0.203497		>tr|Q9VC18|Q9VC18_DROME RE29555p OS=Drosophila melanogaster OX=7227 GN=BEST:GH11240 PE=1 SV=1	-0.0345763
>tr|Q9VTW1|Q9VTW1_DROME RE15265p OS=Drosophila melanogaster OX=7227 GN=Sms PE=1 SV=1	-0.203825		>tr|Q9VC18|Q9VC18_DROME RE29555p OS=Drosophila melanogaster OX=7227 GN=BEST:GH11240 PE=1 SV=1	-0.0345763
>tr|Q9VW54|Q9VW54_DROME 26S proteasome non-ATPase regulatory subunit 2 OS=Drosophila melanogaster OX=7227 GN=Rpn1 PE=1 SV=2	-0.20457		>tr|Q9VC18|Q9VC18_DROME RE29555p OS=Drosophila melanogaster OX=7227 GN=BEST:GH11240 PE=1 SV=1	-0.0345763
>tr|Q9VW54|Q9VW54_DROME 26S proteasome non-ATPase regulatory subunit 2 OS=Drosophila melanogaster OX=7227 GN=Rpn1 PE=1 SV=2	-0.20457		>tr|Q7K3B7|Q7K3B7_DROME 2-hydroxyacyl-CoA lyase OS=Drosophila melanogaster OX=7227 GN=Hacl PE=1 SV=1	-0.0348592
>tr|Q9VWY5|Q9VWY5_DROME CHK domain-containing protein OS=Drosophila melanogaster OX=7227 GN=Dmel\CG7135 PE=1 SV=1	-0.205276		>tr|Q7K3B7|Q7K3B7_DROME 2-hydroxyacyl-CoA lyase OS=Drosophila melanogaster OX=7227 GN=Hacl PE=1 SV=1	-0.0348592
>tr|Q9VWY5|Q9VWY5_DROME CHK domain-containing protein OS=Drosophila melanogaster OX=7227 GN=Dmel\CG7135 PE=1 SV=1	-0.205276		>tr|Q9VD58|Q9VD58_DROME GH26270p OS=Drosophila melanogaster OX=7227 GN=Idh3b PE=1 SV=1	-0.0351351
>tr|Q7JZB1|Q7JZB1_DROME RE49860p OS=Drosophila melanogaster OX=7227 GN=Dmel\CG12338 PE=1 SV=1	-0.205672		>tr|Q9VD58|Q9VD58_DROME GH26270p OS=Drosophila melanogaster OX=7227 GN=Idh3b PE=1 SV=1	-0.0351351
>sp|Q9V3P0|PRDX1_DROME Peroxiredoxin 1 OS=Drosophila melanogaster OX=7227 GN=Jafrac1 PE=1 SV=1	-0.206701		>tr|Q9VD58|Q9VD58_DROME GH26270p OS=Drosophila melanogaster OX=7227 GN=Idh3b PE=1 SV=1	-0.0351351
>sp|Q9V3P0|PRDX1_DROME Peroxiredoxin 1 OS=Drosophila melanogaster OX=7227 GN=Jafrac1 PE=1 SV=1	-0.206701		>sp|Q9VI25|NCDN_DROME Neurochondrin homolog OS=Drosophila melanogaster OX=7227 GN=Neurochondrin PE=2 SV=1	-0.0356846
>sp|Q9V3P0|PRDX1_DROME Peroxiredoxin 1 OS=Drosophila melanogaster OX=7227 GN=Jafrac1 PE=1 SV=1	-0.206701		>sp|Q9VI25|NCDN_DROME Neurochondrin homolog OS=Drosophila melanogaster OX=7227 GN=Neurochondrin PE=2 SV=1	-0.0356846
>tr|Q8MLR1|Q8MLR1_DROME Phosphodiesterase 8, isoform D OS=Drosophila melanogaster OX=7227 GN=Pde8 PE=1 SV=1	-0.207081		>sp|Q9VI25|NCDN_DROME Neurochondrin homolog OS=Drosophila melanogaster OX=7227 GN=Neurochondrin PE=2 SV=1	-0.0356846
>tr|Q8SXC0|Q8SXC0_DROME GH10306p OS=Drosophila melanogaster OX=7227 GN=Dmel\CG5577 PE=2 SV=1	-0.207302		>tr|Q9VPX5|Q9VPX5_DROME Vacuolar protein sorting-associated protein 29 OS=Drosophila melanogaster OX=7227 GN=Vps29 PE=1 SV=1	-0.0357143
>tr|Q9W1B9|Q9W1B9_DROME GEO07602p1 OS=Drosophila melanogaster OX=7227 GN=RpL12 PE=1 SV=1	-0.207879		>tr|Q9VPX5|Q9VPX5_DROME Vacuolar protein sorting-associated protein 29 OS=Drosophila melanogaster OX=7227 GN=Vps29 PE=1 SV=1	-0.0357143
>tr|Q9W1B9|Q9W1B9_DROME GEO07602p1 OS=Drosophila melanogaster OX=7227 GN=RpL12 PE=1 SV=1	-0.207879		>tr|Q9V3D8|Q9V3D8_DROME GH27579p OS=Drosophila melanogaster OX=7227 GN=grsm PE=1 SV=1	-0.0362007
>sp|Q94529|GS1_DROME Probable pseudouridine-5'-phosphatase OS=Drosophila melanogaster OX=7227 GN=Gs1l PE=2 SV=2	-0.209524		>tr|Q9V3D8|Q9V3D8_DROME GH27579p OS=Drosophila melanogaster OX=7227 GN=grsm PE=1 SV=1	-0.0362007
>sp|P45888|ARP2_DROME Actin-related protein 2 OS=Drosophila melanogaster OX=7227 GN=Arp2 PE=2 SV=3	-0.209524		>tr|Q9V3D8|Q9V3D8_DROME GH27579p OS=Drosophila melanogaster OX=7227 GN=grsm PE=1 SV=1	-0.0362007
>sp|P35421|PUR4_DROME Phosphoribosylformylglycinamidine synthase OS=Drosophila melanogaster OX=7227 GN=Pfas PE=1 SV=2	-0.209749		>tr|Q9W0X1|Q9W0X1_DROME GH15894p OS=Drosophila melanogaster OX=7227 GN=cg2736 PE=1 SV=1	-0.0362919
>sp|P35421|PUR4_DROME Phosphoribosylformylglycinamidine synthase OS=Drosophila melanogaster OX=7227 GN=Pfas PE=1 SV=2	-0.209749		>sp|Q9W058|SCOT_DROME Succinyl-CoA:3-ketoacid-coenzyme A transferase, mitochondrial OS=Drosophila melanogaster OX=7227 GN=SCOT PE=1 SV=1	-0.0364341
>sp|P35421|PUR4_DROME Phosphoribosylformylglycinamidine synthase OS=Drosophila melanogaster OX=7227 GN=Pfas PE=1 SV=2	-0.209749		>sp|Q9W058|SCOT_DROME Succinyl-CoA:3-ketoacid-coenzyme A transferase, mitochondrial OS=Drosophila melanogaster OX=7227 GN=SCOT PE=1 SV=1	-0.0364341
>tr|Q9VKV9|Q9VKV9_DROME Methionine aminopeptidase OS=Drosophila melanogaster OX=7227 GN=MAP1B PE=3 SV=2	-0.210095		>sp|Q9W058|SCOT_DROME Succinyl-CoA:3-ketoacid-coenzyme A transferase, mitochondrial OS=Drosophila melanogaster OX=7227 GN=SCOT PE=1 SV=1	-0.0364341
>tr|Q9VI96|Q9VI96_DROME MIP10555p OS=Drosophila melanogaster OX=7227 GN=Dmel\CG10029 PE=2 SV=1	-0.210244		>sp|P35381|ATPA_DROME ATP synthase subunit alpha, mitochondrial OS=Drosophila melanogaster OX=7227 GN=blw PE=1 SV=2	-0.0365942
>sp|Q70PP2|SMG1_DROME Serine/threonine-protein kinase Smg1 OS=Drosophila melanogaster OX=7227 GN=nonC PE=1 SV=2	-0.211529		>sp|P35381|ATPA_DROME ATP synthase subunit alpha, mitochondrial OS=Drosophila melanogaster OX=7227 GN=blw PE=1 SV=2	-0.0365942
>sp|P05031|DDC_DROME Aromatic-L-amino-acid decarboxylase OS=Drosophila melanogaster OX=7227 GN=Ddc PE=1 SV=4	-0.211765		>sp|P35381|ATPA_DROME ATP synthase subunit alpha, mitochondrial OS=Drosophila melanogaster OX=7227 GN=blw PE=1 SV=2	-0.0365942
>tr|Q9VL16|Q9VL16_DROME RE45833p OS=Drosophila melanogaster OX=7227 GN=Dmel\CG5676 PE=2 SV=1	-0.212179		>tr|Q95T98|Q95T98_DROME Elongation of very long chain fatty acids protein OS=Drosophila melanogaster OX=7227 GN=CG9798 PE=2 SV=1	-0.0367232
>tr|Q9VL16|Q9VL16_DROME RE45833p OS=Drosophila melanogaster OX=7227 GN=Dmel\CG5676 PE=2 SV=1	-0.212179		>tr|Q95T98|Q95T98_DROME Elongation of very long chain fatty acids protein OS=Drosophila melanogaster OX=7227 GN=CG9798 PE=2 SV=1	-0.0367232
>sp|Q9V3H2|PSDE_DROME 26S proteasome non-ATPase regulatory subunit 14 OS=Drosophila melanogaster OX=7227 GN=Rpn11 PE=1 SV=1	-0.212338		>tr|Q95T98|Q95T98_DROME Elongation of very long chain fatty acids protein OS=Drosophila melanogaster OX=7227 GN=CG9798 PE=2 SV=1	-0.0367232
>tr|Q9VDU1|Q9VDU1_DROME GH20840p OS=Drosophila melanogaster OX=7227 GN=Dmel\CG11407 PE=1 SV=1	-0.212639		>tr|Q9VHF9|Q9VHF9_DROME Uncharacterized protein, isoform B OS=Drosophila melanogaster OX=7227 GN=Dmel\CG8861 PE=4 SV=3	-0.0376404
>sp|P06605|TBA3_DROME Tubulin alpha-3 chain OS=Drosophila melanogaster OX=7227 GN=alphaTub84D PE=2 SV=1	-0.212667		>tr|Q9VHF9|Q9VHF9_DROME Uncharacterized protein, isoform B OS=Drosophila melanogaster OX=7227 GN=Dmel\CG8861 PE=4 SV=3	-0.0376404
>sp|P06605|TBA3_DROME Tubulin alpha-3 chain OS=Drosophila melanogaster OX=7227 GN=alphaTub84D PE=2 SV=1	-0.212667		>tr|Q7K511|Q7K511_DROME CG3835-RA OS=Drosophila melanogaster OX=7227 GN=D2hgdh PE=1 SV=1	-0.0377111
>sp|P06605|TBA3_DROME Tubulin alpha-3 chain OS=Drosophila melanogaster OX=7227 GN=alphaTub84D PE=2 SV=1	-0.212667		>tr|Q7K511|Q7K511_DROME CG3835-RA OS=Drosophila melanogaster OX=7227 GN=D2hgdh PE=1 SV=1	-0.0377111
>tr|Q9W1H6|Q9W1H6_DROME GH04238p OS=Drosophila melanogaster OX=7227 GN=Dmel\CG5597 PE=1 SV=1	-0.213077		>tr|Q7K511|Q7K511_DROME CG3835-RA OS=Drosophila melanogaster OX=7227 GN=D2hgdh PE=1 SV=1	-0.0377111
>tr|Q9W1H6|Q9W1H6_DROME GH04238p OS=Drosophila melanogaster OX=7227 GN=Dmel\CG5597 PE=1 SV=1	-0.213077		>tr|Q9VZF1|Q9VZF1_DROME GH07444p OS=Drosophila melanogaster OX=7227 GN=Dmel\CG1309 PE=1 SV=1	-0.0379771
>tr|Q9VCR2|Q9VCR2_DROME Uncharacterized protein, isoform A OS=Drosophila melanogaster OX=7227 GN=Dmel\CG6726 PE=1 SV=2	-0.213217		>tr|Q9VZF1|Q9VZF1_DROME GH07444p OS=Drosophila melanogaster OX=7227 GN=Dmel\CG1309 PE=1 SV=1	-0.0379771
>tr|Q9VCR2|Q9VCR2_DROME Uncharacterized protein, isoform A OS=Drosophila melanogaster OX=7227 GN=Dmel\CG6726 PE=1 SV=2	-0.213217		>tr|Q9VZF1|Q9VZF1_DROME GH07444p OS=Drosophila melanogaster OX=7227 GN=Dmel\CG1309 PE=1 SV=1	-0.0379771
>tr|Q9VCR2|Q9VCR2_DROME Uncharacterized protein, isoform A OS=Drosophila melanogaster OX=7227 GN=Dmel\CG6726 PE=1 SV=2	-0.213217		>tr|M9PER1|M9PER1_DROME Autophagy-related 18a, isoform E OS=Drosophila melanogaster OX=7227 GN=Atg18a PE=1 SV=1	-0.038255
>tr|Q9VLC5|Q9VLC5_DROME Aldehyde dehydrogenase OS=Drosophila melanogaster OX=7227 GN=Aldh PE=1 SV=1	-0.214038		>tr|Q9VT69|Q9VT69_DROME Phosphatidylinositol-4,5-bisphosphate 4-phosphatase OS=Drosophila melanogaster OX=7227 GN=Dmel\CG6707 PE=1 SV=1	-0.0383459
>tr|Q9VLC5|Q9VLC5_DROME Aldehyde dehydrogenase OS=Drosophila melanogaster OX=7227 GN=Aldh PE=1 SV=1	-0.214038		>tr|Q9V9S0|Q9V9S0_DROME FI04419p OS=Drosophila melanogaster OX=7227 GN=Lamp1 PE=1 SV=3	-0.0389937
>tr|Q9VLC5|Q9VLC5_DROME Aldehyde dehydrogenase OS=Drosophila melanogaster OX=7227 GN=Aldh PE=1 SV=1	-0.214038		>sp|Q24208|IF2G_DROME Eukaryotic translation initiation factor 2 subunit 3 OS=Drosophila melanogaster OX=7227 GN=eIF2gamma PE=2 SV=1	-0.0404211
>tr|Q9VIE7|Q9VIE7_DROME Burgundy, isoform B OS=Drosophila melanogaster OX=7227 GN=bur PE=1 SV=3	-0.214202		>sp|Q24208|IF2G_DROME Eukaryotic translation initiation factor 2 subunit 3 OS=Drosophila melanogaster OX=7227 GN=eIF2gamma PE=2 SV=1	-0.0404211
>tr|Q9VIE7|Q9VIE7_DROME Burgundy, isoform B OS=Drosophila melanogaster OX=7227 GN=bur PE=1 SV=3	-0.214202		>sp|Q24208|IF2G_DROME Eukaryotic translation initiation factor 2 subunit 3 OS=Drosophila melanogaster OX=7227 GN=eIF2gamma PE=2 SV=1	-0.0404211
>tr|Q95SI7|Q95SI7_DROME GH23390p OS=Drosophila melanogaster OX=7227 GN=Dmel\CG6028 PE=1 SV=1	-0.2157		>tr|Q8T060|Q8T060_DROME AaRS-interacting multifunctional protein 2, isoform B OS=Drosophila melanogaster OX=7227 GN=AIMP2 PE=1 SV=3	-0.0408638
>tr|Q95SI7|Q95SI7_DROME GH23390p OS=Drosophila melanogaster OX=7227 GN=Dmel\CG6028 PE=1 SV=1	-0.2157		>tr|B4ZJ91|B4ZJ91_DROME Seminal fluid protein 24Bb OS=Drosophila melanogaster OX=7227 GN=Sfp24Bb PE=2 SV=1	-0.0409091
>sp|P91926|AP2A_DROME AP-2 complex subunit alpha OS=Drosophila melanogaster OX=7227 GN=AP-2alpha PE=1 SV=1	-0.215745		>tr|B4ZJ91|B4ZJ91_DROME Seminal fluid protein 24Bb OS=Drosophila melanogaster OX=7227 GN=Sfp24Bb PE=2 SV=1	-0.0409091
>sp|P91926|AP2A_DROME AP-2 complex subunit alpha OS=Drosophila melanogaster OX=7227 GN=AP-2alpha PE=1 SV=1	-0.215745		>tr|B4ZJ91|B4ZJ91_DROME Seminal fluid protein 24Bb OS=Drosophila melanogaster OX=7227 GN=Sfp24Bb PE=2 SV=1	-0.0409091
>sp|P91926|AP2A_DROME AP-2 complex subunit alpha OS=Drosophila melanogaster OX=7227 GN=AP-2alpha PE=1 SV=1	-0.215745		>sp|O62619|KPYK_DROME Pyruvate kinase OS=Drosophila melanogaster OX=7227 GN=PyK PE=2 SV=2	-0.0424015
>tr|E8NH57|E8NH57_DROME Henna, isoform D OS=Drosophila melanogaster OX=7227 GN=Hn PE=1 SV=1	-0.216292		>sp|O62619|KPYK_DROME Pyruvate kinase OS=Drosophila melanogaster OX=7227 GN=PyK PE=2 SV=2	-0.0424015
>tr|Q9VNX4|Q9VNX4_DROME Multifunctional fusion protein OS=Drosophila melanogaster OX=7227 GN=P5CDh1 PE=1 SV=1	-0.217422		>sp|O62619|KPYK_DROME Pyruvate kinase OS=Drosophila melanogaster OX=7227 GN=PyK PE=2 SV=2	-0.0424015
>tr|Q9VNX4|Q9VNX4_DROME Multifunctional fusion protein OS=Drosophila melanogaster OX=7227 GN=P5CDh1 PE=1 SV=1	-0.217422		>tr|Q9VKA1|Q9VKA1_DROME FI02817p OS=Drosophila melanogaster OX=7227 GN=Dmel\CG6583 PE=2 SV=1	-0.0435065
>tr|Q9VNX4|Q9VNX4_DROME Multifunctional fusion protein OS=Drosophila melanogaster OX=7227 GN=P5CDh1 PE=1 SV=1	-0.217422		>tr|Q9VKA1|Q9VKA1_DROME FI02817p OS=Drosophila melanogaster OX=7227 GN=Dmel\CG6583 PE=2 SV=1	-0.0435065
>sp|Q9VHS8|IF4A3_DROME Eukaryotic initiation factor 4A-III OS=Drosophila melanogaster OX=7227 GN=CG7483 PE=1 SV=1	-0.217794		>sp|A8DYH2|UFM1_DROME Ubiquitin-fold modifier 1 OS=Drosophila melanogaster OX=7227 GN=Ufm1 PE=1 SV=1	-0.0436782
>tr|Q8IN51|Q8IN51_DROME FI17609p1 OS=Drosophila melanogaster OX=7227 GN=Dmel\CG31205 PE=1 SV=2	-0.217883		>sp|A8DYH2|UFM1_DROME Ubiquitin-fold modifier 1 OS=Drosophila melanogaster OX=7227 GN=Ufm1 PE=1 SV=1	-0.0436782
>tr|Q9VF51|Q9VF51_DROME Aldehyde oxidase 3, isoform A OS=Drosophila melanogaster OX=7227 GN=AOX3 PE=1 SV=1	-0.21874		>sp|A8DYH2|UFM1_DROME Ubiquitin-fold modifier 1 OS=Drosophila melanogaster OX=7227 GN=Ufm1 PE=1 SV=1	-0.0436782
>tr|Q9VF51|Q9VF51_DROME Aldehyde oxidase 3, isoform A OS=Drosophila melanogaster OX=7227 GN=AOX3 PE=1 SV=1	-0.21874		>tr|Q9VEH2|Q9VEH2_DROME Uncharacterized protein OS=Drosophila melanogaster OX=7227 GN=Dmel\CG7523 PE=1 SV=1	-0.0438462
>tr|Q9VF51|Q9VF51_DROME Aldehyde oxidase 3, isoform A OS=Drosophila melanogaster OX=7227 GN=AOX3 PE=1 SV=1	-0.21874		>sp|Q9XYZ5|DDB1_DROME DNA damage-binding protein 1 OS=Drosophila melanogaster OX=7227 GN=pic PE=1 SV=1	-0.0446491
>tr|A1ZBJ2|A1ZBJ2_DROME Uncharacterized protein, isoform B OS=Drosophila melanogaster OX=7227 GN=cg7461 PE=1 SV=2	-0.218979		>tr|Q9VTV9|Q9VTV9_DROME Delta-aminolevulinic acid dehydratase OS=Drosophila melanogaster OX=7227 GN=Pbgs PE=1 SV=1	-0.0452599
>tr|A1ZBJ2|A1ZBJ2_DROME Uncharacterized protein, isoform B OS=Drosophila melanogaster OX=7227 GN=cg7461 PE=1 SV=2	-0.218979		>tr|Q9VTV9|Q9VTV9_DROME Delta-aminolevulinic acid dehydratase OS=Drosophila melanogaster OX=7227 GN=Pbgs PE=1 SV=1	-0.0452599
>tr|A1ZBJ2|A1ZBJ2_DROME Uncharacterized protein, isoform B OS=Drosophila melanogaster OX=7227 GN=cg7461 PE=1 SV=2	-0.218979		>tr|Q9VZZ5|Q9VZZ5_DROME GEO12033p1 OS=Drosophila melanogaster OX=7227 GN=Dmel\CG16986 PE=1 SV=1	-0.0454545
>tr|P91941|P91941_DROME Adult cuticle protein 65Aa OS=Drosophila melanogaster OX=7227 GN=Acp65Aa PE=1 SV=2	-0.219048		>tr|Q9VZZ5|Q9VZZ5_DROME GEO12033p1 OS=Drosophila melanogaster OX=7227 GN=Dmel\CG16986 PE=1 SV=1	-0.0454545
>tr|P91941|P91941_DROME Adult cuticle protein 65Aa OS=Drosophila melanogaster OX=7227 GN=Acp65Aa PE=1 SV=2	-0.219048		>tr|Q9VLP1|Q9VLP1_DROME GEO08095p1 OS=Drosophila melanogaster OX=7227 GN=Dmel\CG14275 PE=1 SV=1	-0.0459459
>tr|P91941|P91941_DROME Adult cuticle protein 65Aa OS=Drosophila melanogaster OX=7227 GN=Acp65Aa PE=1 SV=2	-0.219048		>tr|Q9VLP1|Q9VLP1_DROME GEO08095p1 OS=Drosophila melanogaster OX=7227 GN=Dmel\CG14275 PE=1 SV=1	-0.0459459
>tr|X2JID2|X2JID2_DROME GEO13083p1 OS=Drosophila melanogaster OX=7227 GN=TrxT PE=2 SV=1	-0.221656		>tr|Q9VLP1|Q9VLP1_DROME GEO08095p1 OS=Drosophila melanogaster OX=7227 GN=Dmel\CG14275 PE=1 SV=1	-0.0459459
>tr|Q8IPQ2|Q8IPQ2_DROME Collapsin response mediator protein OS=Drosophila melanogaster OX=7227 GN=CRMP PE=1 SV=2	-0.221886		>tr|Q9VGQ1|Q9VGQ1_DROME GM01350p OS=Drosophila melanogaster OX=7227 GN=alpha-KGDHC PE=1 SV=1	-0.0461538
>tr|Q8IPQ2|Q8IPQ2_DROME Collapsin response mediator protein OS=Drosophila melanogaster OX=7227 GN=CRMP PE=1 SV=2	-0.221886		>tr|Q9VGQ1|Q9VGQ1_DROME GM01350p OS=Drosophila melanogaster OX=7227 GN=alpha-KGDHC PE=1 SV=1	-0.0461538
>tr|Q8IPQ2|Q8IPQ2_DROME Collapsin response mediator protein OS=Drosophila melanogaster OX=7227 GN=CRMP PE=1 SV=2	-0.221886		>tr|Q9VGQ1|Q9VGQ1_DROME GM01350p OS=Drosophila melanogaster OX=7227 GN=alpha-KGDHC PE=1 SV=1	-0.0461538
>tr|Q7KV94|Q7KV94_DROME GH04180p OS=Drosophila melanogaster OX=7227 GN=CG16760 PE=1 SV=1	-0.222946		>tr|Q9W350|Q9W350_DROME C11.1, isoform A OS=Drosophila melanogaster OX=7227 GN=c11.1 PE=1 SV=2	-0.047302
>tr|Q9VCQ9|Q9VCQ9_DROME RE20374p OS=Drosophila melanogaster OX=7227 GN=Dmel\CG6733 PE=2 SV=1	-0.223192		>tr|Q9W350|Q9W350_DROME C11.1, isoform A OS=Drosophila melanogaster OX=7227 GN=c11.1 PE=1 SV=2	-0.047302
>tr|Q9VCQ9|Q9VCQ9_DROME RE20374p OS=Drosophila melanogaster OX=7227 GN=Dmel\CG6733 PE=2 SV=1	-0.223192		>tr|Q9W5B4|Q9W5B4_DROME GH18858p OS=Drosophila melanogaster OX=7227 GN=EG:103E12.2 PE=1 SV=1	-0.0489028
>sp|Q9VSA3|ACADM_DROME Probable medium-chain specific acyl-CoA dehydrogenase, mitochondrial OS=Drosophila melanogaster OX=7227 GN=CG12262 PE=2 SV=1	-0.223628		>tr|Q9W5B4|Q9W5B4_DROME GH18858p OS=Drosophila melanogaster OX=7227 GN=EG:103E12.2 PE=1 SV=1	-0.0489028
>sp|Q9VSA3|ACADM_DROME Probable medium-chain specific acyl-CoA dehydrogenase, mitochondrial OS=Drosophila melanogaster OX=7227 GN=CG12262 PE=2 SV=1	-0.223628		>tr|Q9W5B4|Q9W5B4_DROME GH18858p OS=Drosophila melanogaster OX=7227 GN=EG:103E12.2 PE=1 SV=1	-0.0489028
>sp|Q9VSA3|ACADM_DROME Probable medium-chain specific acyl-CoA dehydrogenase, mitochondrial OS=Drosophila melanogaster OX=7227 GN=CG12262 PE=2 SV=1	-0.223628		>sp|P40792|RAC1_DROME Ras-related protein Rac1 OS=Drosophila melanogaster OX=7227 GN=Rac1 PE=1 SV=2	-0.0489583
>tr|Q9VPK3|Q9VPK3_DROME AT24407p OS=Drosophila melanogaster OX=7227 GN=Dmel\CG31974 PE=2 SV=3	-0.224455		>sp|P40792|RAC1_DROME Ras-related protein Rac1 OS=Drosophila melanogaster OX=7227 GN=Rac1 PE=1 SV=2	-0.0489583
>tr|Q9VPK3|Q9VPK3_DROME AT24407p OS=Drosophila melanogaster OX=7227 GN=Dmel\CG31974 PE=2 SV=3	-0.224455		>sp|P40792|RAC1_DROME Ras-related protein Rac1 OS=Drosophila melanogaster OX=7227 GN=Rac1 PE=1 SV=2	-0.0489583
>tr|Q9VQI7|Q9VQI7_DROME Peroxiredoxin 6005 OS=Drosophila melanogaster OX=7227 GN=Prx6005 PE=1 SV=1	-0.225676		>tr|Q9VRJ4|Q9VRJ4_DROME SD02021p OS=Drosophila melanogaster OX=7227 GN=Dmel\CG10672 PE=1 SV=1	-0.0495268
>tr|Q9VQI7|Q9VQI7_DROME Peroxiredoxin 6005 OS=Drosophila melanogaster OX=7227 GN=Prx6005 PE=1 SV=1	-0.225676		>tr|Q9VRJ4|Q9VRJ4_DROME SD02021p OS=Drosophila melanogaster OX=7227 GN=Dmel\CG10672 PE=1 SV=1	-0.0495268
>tr|Q8SYQ4|Q8SYQ4_DROME RE42475p OS=Drosophila melanogaster OX=7227 GN=BcDNA:RE42475 PE=1 SV=1	-0.225676		>tr|Q9VRJ4|Q9VRJ4_DROME SD02021p OS=Drosophila melanogaster OX=7227 GN=Dmel\CG10672 PE=1 SV=1	-0.0495268
>tr|Q9VQI7|Q9VQI7_DROME Peroxiredoxin 6005 OS=Drosophila melanogaster OX=7227 GN=Prx6005 PE=1 SV=1	-0.225676		>tr|A1Z8U4|A1Z8U4_DROME Chaperonin containing TCP1 subunit 5, isoform B OS=Drosophila melanogaster OX=7227 GN=CCT5 PE=1 SV=1	-0.0496094
>tr|M9NF32|M9NF32_DROME Leucine carboxyl methyltransferase 1 OS=Drosophila melanogaster OX=7227 GN=BG:DS09217.4 PE=1 SV=1	-0.2261		>tr|A1Z8U4|A1Z8U4_DROME Chaperonin containing TCP1 subunit 5, isoform B OS=Drosophila melanogaster OX=7227 GN=CCT5 PE=1 SV=1	-0.0496094
>tr|M9NF32|M9NF32_DROME Leucine carboxyl methyltransferase 1 OS=Drosophila melanogaster OX=7227 GN=BG:DS09217.4 PE=1 SV=1	-0.2261		>tr|A1Z8U4|A1Z8U4_DROME Chaperonin containing TCP1 subunit 5, isoform B OS=Drosophila melanogaster OX=7227 GN=CCT5 PE=1 SV=1	-0.0496094
>tr|O76752|O76752_DROME CG12117-PA OS=Drosophila melanogaster OX=7227 GN=Sptr PE=1 SV=1	-0.226437		>sp|P13607|ATNA_DROME Sodium/potassium-transporting ATPase subunit alpha OS=Drosophila melanogaster OX=7227 GN=Atpalpha PE=1 SV=3	-0.0497598
>tr|Q9W555|Q9W555_DROME Coatomer subunit delta OS=Drosophila melanogaster OX=7227 GN=deltaCOP PE=1 SV=1	-0.226692		>sp|P13607|ATNA_DROME Sodium/potassium-transporting ATPase subunit alpha OS=Drosophila melanogaster OX=7227 GN=Atpalpha PE=1 SV=3	-0.0497598
>tr|Q9VLY7|Q9VLY7_DROME GH05679p OS=Drosophila melanogaster OX=7227 GN=Tep3 PE=1 SV=2	-0.227297		>sp|P13607|ATNA_DROME Sodium/potassium-transporting ATPase subunit alpha OS=Drosophila melanogaster OX=7227 GN=Atpalpha PE=1 SV=3	-0.0497598
>tr|Q9VTZ4|Q9VTZ4_DROME Phosphoacetylglucosamine mutase OS=Drosophila melanogaster OX=7227 GN=nst PE=1 SV=1	-0.228233		>tr|Q9W3Z3|Q9W3Z3_DROME Serine--pyruvate aminotransferase OS=Drosophila melanogaster OX=7227 GN=Spat PE=1 SV=1	-0.0527919
>tr|Q7JXB5|Q7JXB5_DROME Phosphoenolpyruvate carboxykinase 2, isoform A OS=Drosophila melanogaster OX=7227 GN=Pepck2 PE=1 SV=1	-0.228683		>tr|Q9W3Z3|Q9W3Z3_DROME Serine--pyruvate aminotransferase OS=Drosophila melanogaster OX=7227 GN=Spat PE=1 SV=1	-0.0527919
>tr|Q9VKG4|Q9VKG4_DROME BcDNA.GH07269 OS=Drosophila melanogaster OX=7227 GN=Dmel\CG31705 PE=1 SV=2	-0.228739		>tr|Q9W3L4|Q9W3L4_DROME GH20802p OS=Drosophila melanogaster OX=7227 GN=Dmel\CG2233 PE=1 SV=1	-0.0533816
>tr|A0A0B4KGI5|A0A0B4KGI5_DROME Carboxylic ester hydrolase OS=Drosophila melanogaster OX=7227 GN=Ace PE=1 SV=1	-0.228931		>tr|Q9W3L4|Q9W3L4_DROME GH20802p OS=Drosophila melanogaster OX=7227 GN=Dmel\CG2233 PE=1 SV=1	-0.0533816
>tr|A0A0B4KGI5|A0A0B4KGI5_DROME Carboxylic ester hydrolase OS=Drosophila melanogaster OX=7227 GN=Ace PE=1 SV=1	-0.228931		>tr|Q9W3L4|Q9W3L4_DROME GH20802p OS=Drosophila melanogaster OX=7227 GN=Dmel\CG2233 PE=1 SV=1	-0.0533816
>tr|Q9VPX7|Q9VPX7_DROME Adenylyl cyclase-associated protein OS=Drosophila melanogaster OX=7227 GN=capt PE=1 SV=2	-0.229245		>tr|Q9Y143|Q9Y143_DROME BcDNA.GH05536 OS=Drosophila melanogaster OX=7227 GN=CT18390 PE=1 SV=1	-0.0534351
>tr|Q9VPX7|Q9VPX7_DROME Adenylyl cyclase-associated protein OS=Drosophila melanogaster OX=7227 GN=capt PE=1 SV=2	-0.229245		>tr|Q9Y143|Q9Y143_DROME BcDNA.GH05536 OS=Drosophila melanogaster OX=7227 GN=CT18390 PE=1 SV=1	-0.0534351
>tr|Q9VPX7|Q9VPX7_DROME Adenylyl cyclase-associated protein OS=Drosophila melanogaster OX=7227 GN=capt PE=1 SV=2	-0.229245		>tr|Q9Y143|Q9Y143_DROME BcDNA.GH05536 OS=Drosophila melanogaster OX=7227 GN=CT18390 PE=1 SV=1	-0.0534351
>sp|Q9VZX9|SAHH2_DROME Adenosylhomocysteinase-like 1 OS=Drosophila melanogaster OX=7227 GN=AhcyL1 PE=1 SV=1	-0.230326		>sp|Q9VIU7|DPM1_DROME Probable dolichol-phosphate mannosyltransferase OS=Drosophila melanogaster OX=7227 GN=CG10166 PE=3 SV=1	-0.0539419
>tr|Q8IQZ7|Q8IQZ7_DROME FI19014p1 OS=Drosophila melanogaster OX=7227 GN=Fim PE=1 SV=1	-0.230577		>sp|Q9VIU7|DPM1_DROME Probable dolichol-phosphate mannosyltransferase OS=Drosophila melanogaster OX=7227 GN=CG10166 PE=3 SV=1	-0.0539419
>tr|Q8IQZ7|Q8IQZ7_DROME FI19014p1 OS=Drosophila melanogaster OX=7227 GN=Fim PE=1 SV=1	-0.230577		>sp|Q9VIU7|DPM1_DROME Probable dolichol-phosphate mannosyltransferase OS=Drosophila melanogaster OX=7227 GN=CG10166 PE=3 SV=1	-0.0539419
>tr|Q8IQZ7|Q8IQZ7_DROME FI19014p1 OS=Drosophila melanogaster OX=7227 GN=Fim PE=1 SV=1	-0.230577		>sp|P08570|RLA1_DROME 60S acidic ribosomal protein P1 OS=Drosophila melanogaster OX=7227 GN=RpLP1 PE=1 SV=2	-0.0544643
>sp|P20432|GSTD1_DROME Glutathione S-transferase D1 OS=Drosophila melanogaster OX=7227 GN=GstD1 PE=1 SV=1	-0.230622		>sp|P08570|RLA1_DROME 60S acidic ribosomal protein P1 OS=Drosophila melanogaster OX=7227 GN=RpLP1 PE=1 SV=2	-0.0544643
>sp|P20432|GSTD1_DROME Glutathione S-transferase D1 OS=Drosophila melanogaster OX=7227 GN=GstD1 PE=1 SV=1	-0.230622		>sp|P08570|RLA1_DROME 60S acidic ribosomal protein P1 OS=Drosophila melanogaster OX=7227 GN=RpLP1 PE=1 SV=2	-0.0544643
>sp|P20432|GSTD1_DROME Glutathione S-transferase D1 OS=Drosophila melanogaster OX=7227 GN=GstD1 PE=1 SV=1	-0.230622		>tr|Q59DP8|Q59DP8_DROME Calcium-transporting ATPase OS=Drosophila melanogaster OX=7227 GN=PMCA PE=1 SV=3	-0.0553571
>tr|Q9W0Q0|Q9W0Q0_DROME AT28366p OS=Drosophila melanogaster OX=7227 GN=Ppm1 PE=2 SV=1	-0.230682		>tr|Q9VYT6|Q9VYT6_DROME RE49489p OS=Drosophila melanogaster OX=7227 GN=p24-1 PE=1 SV=1	-0.0557143
>tr|Q9VY45|Q9VY45_DROME GH10289p OS=Drosophila melanogaster OX=7227 GN=Dmel\CG1434 PE=1 SV=2	-0.230867		>tr|Q9VYT6|Q9VYT6_DROME RE49489p OS=Drosophila melanogaster OX=7227 GN=p24-1 PE=1 SV=1	-0.0557143
>tr|Q9VQ29|Q9VQ29_DROME Cytochrome b-c1 complex subunit Rieske, mitochondrial OS=Drosophila melanogaster OX=7227 GN=RFeSP PE=1 SV=3	-0.231304		>tr|Q7KV95|Q7KV95_DROME Purine nucleoside phosphorylase OS=Drosophila melanogaster OX=7227 GN=CG16760 PE=1 SV=1	-0.0567073
>tr|Q9VQ29|Q9VQ29_DROME Cytochrome b-c1 complex subunit Rieske, mitochondrial OS=Drosophila melanogaster OX=7227 GN=RFeSP PE=1 SV=3	-0.231304		>tr|Q7KV95|Q7KV95_DROME Purine nucleoside phosphorylase OS=Drosophila melanogaster OX=7227 GN=CG16760 PE=1 SV=1	-0.0567073
>sp|P50882|RL9_DROME 60S ribosomal protein L9 OS=Drosophila melanogaster OX=7227 GN=RpL9 PE=1 SV=2	-0.232105		>tr|Q7KV95|Q7KV95_DROME Purine nucleoside phosphorylase OS=Drosophila melanogaster OX=7227 GN=CG16760 PE=1 SV=1	-0.0567073
>sp|P15007|ENO_DROME Enolase OS=Drosophila melanogaster OX=7227 GN=Eno PE=1 SV=2	-0.2322		>tr|A1ZB69|A1ZB69_DROME Glutathione S transferase E4 OS=Drosophila melanogaster OX=7227 GN=GstE4 PE=3 SV=1	-0.0572072
>sp|P15007|ENO_DROME Enolase OS=Drosophila melanogaster OX=7227 GN=Eno PE=1 SV=2	-0.2322		>sp|Q9W1L5|PAL2_DROME Peptidyl-alpha-hydroxyglycine alpha-amidating lyase 2 OS=Drosophila melanogaster OX=7227 GN=Pal2 PE=1 SV=2	-0.0576355
>sp|P15007|ENO_DROME Enolase OS=Drosophila melanogaster OX=7227 GN=Eno PE=1 SV=2	-0.2322		>sp|Q9W1L5|PAL2_DROME Peptidyl-alpha-hydroxyglycine alpha-amidating lyase 2 OS=Drosophila melanogaster OX=7227 GN=Pal2 PE=1 SV=2	-0.0576355
>tr|Q9VRT5|Q9VRT5_DROME Uncharacterized protein OS=Drosophila melanogaster OX=7227 GN=Dmel\CG6602 PE=4 SV=1	-0.233028		>tr|E1JGK3|E1JGK3_DROME FI18012p1 OS=Drosophila melanogaster OX=7227 GN=Dmel\CG4984 PE=2 SV=1	-0.0579418
>sp|Q9V438|PDIA6_DROME Protein disulfide-isomerase A6 homolog OS=Drosophila melanogaster OX=7227 GN=CaBP1 PE=1 SV=1	-0.233256		>tr|E1JGK3|E1JGK3_DROME FI18012p1 OS=Drosophila melanogaster OX=7227 GN=Dmel\CG4984 PE=2 SV=1	-0.0579418
>sp|Q9V438|PDIA6_DROME Protein disulfide-isomerase A6 homolog OS=Drosophila melanogaster OX=7227 GN=CaBP1 PE=1 SV=1	-0.233256		>tr|Q9VVT6|Q9VVT6_DROME GEO08966p1 OS=Drosophila melanogaster OX=7227 GN=Grx1 PE=2 SV=1	-0.0605263
>sp|Q9V438|PDIA6_DROME Protein disulfide-isomerase A6 homolog OS=Drosophila melanogaster OX=7227 GN=CaBP1 PE=1 SV=1	-0.233256		>tr|Q9VVT6|Q9VVT6_DROME GEO08966p1 OS=Drosophila melanogaster OX=7227 GN=Grx1 PE=2 SV=1	-0.0605263
>tr|Q8IMH4|Q8IMH4_DROME Saposin-related, isoform B OS=Drosophila melanogaster OX=7227 GN=Sap-r PE=1 SV=2	-0.23379		>tr|Q9VVT6|Q9VVT6_DROME GEO08966p1 OS=Drosophila melanogaster OX=7227 GN=Grx1 PE=2 SV=1	-0.0605263
>sp|Q9W401|CISY_DROME Probable citrate synthase, mitochondrial OS=Drosophila melanogaster OX=7227 GN=kdn PE=2 SV=1	-0.233836		>tr|Q8IPZ3|Q8IPZ3_DROME FI02982p OS=Drosophila melanogaster OX=7227 GN=Dmel\CG17221 PE=1 SV=1	-0.0612591
>sp|Q9W401|CISY_DROME Probable citrate synthase, mitochondrial OS=Drosophila melanogaster OX=7227 GN=kdn PE=2 SV=1	-0.233836		>tr|Q8IPZ3|Q8IPZ3_DROME FI02982p OS=Drosophila melanogaster OX=7227 GN=Dmel\CG17221 PE=1 SV=1	-0.0612591
>sp|Q9W401|CISY_DROME Probable citrate synthase, mitochondrial OS=Drosophila melanogaster OX=7227 GN=kdn PE=2 SV=1	-0.233836		>tr|Q8IPZ3|Q8IPZ3_DROME FI02982p OS=Drosophila melanogaster OX=7227 GN=Dmel\CG17221 PE=1 SV=1	-0.0612591
>tr|Q9VRD9|Q9VRD9_DROME Cystathionine beta-synthase OS=Drosophila melanogaster OX=7227 GN=Cbs PE=1 SV=1	-0.233908		>sp|Q9VW26|OAT_DROME Ornithine aminotransferase, mitochondrial OS=Drosophila melanogaster OX=7227 GN=Oat PE=2 SV=1	-0.0614849
>tr|Q9VRD9|Q9VRD9_DROME Cystathionine beta-synthase OS=Drosophila melanogaster OX=7227 GN=Cbs PE=1 SV=1	-0.233908		>sp|Q9VW26|OAT_DROME Ornithine aminotransferase, mitochondrial OS=Drosophila melanogaster OX=7227 GN=Oat PE=2 SV=1	-0.0614849
>tr|Q9VRD9|Q9VRD9_DROME Cystathionine beta-synthase OS=Drosophila melanogaster OX=7227 GN=Cbs PE=1 SV=1	-0.233908		>sp|Q9VW26|OAT_DROME Ornithine aminotransferase, mitochondrial OS=Drosophila melanogaster OX=7227 GN=Oat PE=2 SV=1	-0.0614849
>sp|P61209|ARF1_DROME ADP-ribosylation factor 1 OS=Drosophila melanogaster OX=7227 GN=Arf79F PE=1 SV=2	-0.234066		>tr|A0A0B4LGV1|A0A0B4LGV1_DROME ER membrane protein complex 1, isoform C OS=Drosophila melanogaster OX=7227 GN=EMC1 PE=1 SV=1	-0.0617841
>sp|P61209|ARF1_DROME ADP-ribosylation factor 1 OS=Drosophila melanogaster OX=7227 GN=Arf79F PE=1 SV=2	-0.234066		>tr|M9PF46|M9PF46_DROME Uncharacterized protein, isoform G OS=Drosophila melanogaster OX=7227 GN=Dmel\CG6767 PE=1 SV=1	-0.0630027
>sp|Q9VUX2|MIB_DROME E3 ubiquitin-protein ligase mind-bomb OS=Drosophila melanogaster OX=7227 GN=mib1 PE=1 SV=3	-0.23491		>tr|M9PF46|M9PF46_DROME Uncharacterized protein, isoform G OS=Drosophila melanogaster OX=7227 GN=Prps PE=1 SV=1	-0.0630027
>tr|O62530|O62530_DROME Adaptor protein complex 2, mu subunit, isoform A OS=Drosophila melanogaster OX=7227 GN=AP-2mu PE=1 SV=1	-0.23524		>tr|M9PF46|M9PF46_DROME Uncharacterized protein, isoform G OS=Drosophila melanogaster OX=7227 GN=Prps PE=1 SV=1	-0.0630027
>tr|O62530|O62530_DROME Adaptor protein complex 2, mu subunit, isoform A OS=Drosophila melanogaster OX=7227 GN=AP-2mu PE=1 SV=1	-0.23524		>tr|Q9W1H8|Q9W1H8_DROME GH13256p OS=Drosophila melanogaster OX=7227 GN=Mtpbeta PE=1 SV=1	-0.0637527
>tr|Q9VJ43|Q9VJ43_DROME LD10783p OS=Drosophila melanogaster OX=7227 GN=ScpX PE=1 SV=1	-0.235662		>tr|Q9W1H8|Q9W1H8_DROME GH13256p OS=Drosophila melanogaster OX=7227 GN=Mtpbeta PE=1 SV=1	-0.0637527
>tr|Q9VJ43|Q9VJ43_DROME LD10783p OS=Drosophila melanogaster OX=7227 GN=ScpX PE=1 SV=1	-0.235662		>tr|Q9W1H8|Q9W1H8_DROME GH13256p OS=Drosophila melanogaster OX=7227 GN=Mtpbeta PE=1 SV=1	-0.0637527
>tr|Q9VRP2|Q9VRP2_DROME Uncharacterized protein, isoform A OS=Drosophila melanogaster OX=7227 GN=BEST:CK00496 PE=1 SV=1	-0.236061		>sp|Q9VCA5|SYFB_DROME Phenylalanine--tRNA ligase beta subunit OS=Drosophila melanogaster OX=7227 GN=beta-PheRS PE=1 SV=1	-0.065365
>tr|Q960D4|Q960D4_DROME SD06560p OS=Drosophila melanogaster OX=7227 GN=EG:22E5.5 PE=1 SV=1	-0.236256		>sp|Q9VCA5|SYFB_DROME Phenylalanine--tRNA ligase beta subunit OS=Drosophila melanogaster OX=7227 GN=beta-PheRS PE=1 SV=1	-0.065365
>tr|Q960D4|Q960D4_DROME SD06560p OS=Drosophila melanogaster OX=7227 GN=EG:22E5.5 PE=1 SV=1	-0.236256		>sp|Q9VCA5|SYFB_DROME Phenylalanine--tRNA ligase beta subunit OS=Drosophila melanogaster OX=7227 GN=beta-PheRS PE=1 SV=1	-0.065365
>tr|Q960D4|Q960D4_DROME SD06560p OS=Drosophila melanogaster OX=7227 GN=EG:22E5.5 PE=1 SV=1	-0.236256		>tr|Q95R82|Q95R82_DROME SD02746p OS=Drosophila melanogaster OX=7227 GN=Dmel\CG14767 PE=2 SV=1	-0.0656542
>sp|Q9V8W3|RABEP_DROME Rab proteins geranylgeranyltransferase component A OS=Drosophila melanogaster OX=7227 GN=Rep PE=1 SV=1	-0.236595		>tr|Q9W269|Q9W269_DROME Solute carrier organic anion transporter family member OS=Drosophila melanogaster OX=7227 GN=Oatp58Dc PE=1 SV=1	-0.066033
>tr|Q9V4E5|Q9V4E5_DROME Eph receptor tyrosine kinase, isoform C OS=Drosophila melanogaster OX=7227 GN=Eph PE=3 SV=4	-0.23677		>tr|Q9W392|Q9W392_DROME Chaperonin containing TCP1 subunit 2 OS=Drosophila melanogaster OX=7227 GN=CCT2 PE=1 SV=2	-0.0661682
>sp|P40304|PSB1_DROME Proteasome subunit beta type-1 OS=Drosophila melanogaster OX=7227 GN=Prosbeta6 PE=2 SV=2	-0.237021		>tr|Q9W392|Q9W392_DROME Chaperonin containing TCP1 subunit 2 OS=Drosophila melanogaster OX=7227 GN=CCT2 PE=1 SV=2	-0.0661682
>sp|P20228|DCE_DROME Glutamate decarboxylase OS=Drosophila melanogaster OX=7227 GN=Gad1 PE=2 SV=2	-0.237059		>tr|Q9W392|Q9W392_DROME Chaperonin containing TCP1 subunit 2 OS=Drosophila melanogaster OX=7227 GN=CCT2 PE=1 SV=2	-0.0661682
>sp|P20228|DCE_DROME Glutamate decarboxylase OS=Drosophila melanogaster OX=7227 GN=Gad1 PE=2 SV=2	-0.237059		>sp|Q7K486|ARMC6_DROME Armadillo repeat-containing protein 6 homolog OS=Drosophila melanogaster OX=7227 GN=CG5721 PE=1 SV=1	-0.0670259
>sp|P20228|DCE_DROME Glutamate decarboxylase OS=Drosophila melanogaster OX=7227 GN=Gad1 PE=2 SV=2	-0.237059		>sp|Q7K486|ARMC6_DROME Armadillo repeat-containing protein 6 homolog OS=Drosophila melanogaster OX=7227 GN=CG5721 PE=1 SV=1	-0.0670259
>sp|P52029|G6PI_DROME Glucose-6-phosphate isomerase OS=Drosophila melanogaster OX=7227 GN=Pgi PE=2 SV=2	-0.237276		>sp|Q9TVM2|XPO1_DROME Exportin-1 OS=Drosophila melanogaster OX=7227 GN=emb PE=1 SV=1	-0.0674506
>sp|P52029|G6PI_DROME Glucose-6-phosphate isomerase OS=Drosophila melanogaster OX=7227 GN=Pgi PE=2 SV=2	-0.237276		>sp|Q9TVM2|XPO1_DROME Exportin-1 OS=Drosophila melanogaster OX=7227 GN=emb PE=1 SV=1	-0.0674506
>sp|P52029|G6PI_DROME Glucose-6-phosphate isomerase OS=Drosophila melanogaster OX=7227 GN=Pgi PE=2 SV=2	-0.237276		>tr|Q7K3J0|Q7K3J0_DROME Chaperonin containing TCP1 subunit 8 OS=Drosophila melanogaster OX=7227 GN=CCT8 PE=1 SV=1	-0.0675824
>tr|Q9VHA1|Q9VHA1_DROME Spermidine synthase, isoform A OS=Drosophila melanogaster OX=7227 GN=SpdS PE=1 SV=1	-0.237282		>tr|Q7K3J0|Q7K3J0_DROME Chaperonin containing TCP1 subunit 8 OS=Drosophila melanogaster OX=7227 GN=CCT8 PE=1 SV=1	-0.0675824
>tr|Q7PLS1|Q7PLS1_DROME LD01937p OS=Drosophila melanogaster OX=7227 GN=Dmel\CG12567 PE=1 SV=2	-0.238109		>tr|Q7K3J0|Q7K3J0_DROME Chaperonin containing TCP1 subunit 8 OS=Drosophila melanogaster OX=7227 GN=CCT8 PE=1 SV=1	-0.0675824
>tr|Q7KN61|Q7KN61_DROME Farnesyl pyrophosphate synthase OS=Drosophila melanogaster OX=7227 GN=Fpps PE=1 SV=1	-0.238186		>sp|Q9VA73|CMC_DROME Calcium-binding mitochondrial carrier protein Aralar1 OS=Drosophila melanogaster OX=7227 GN=aralar1 PE=2 SV=1	-0.0676259
>tr|Q9VNX0|Q9VNX0_DROME Uncharacterized protein, isoform A OS=Drosophila melanogaster OX=7227 GN=NP_649372 PE=1 SV=2	-0.238346		>sp|Q9VA73|CMC_DROME Calcium-binding mitochondrial carrier protein Aralar1 OS=Drosophila melanogaster OX=7227 GN=aralar1 PE=2 SV=1	-0.0676259
>sp|Q27331|VATA2_DROME V-type proton ATPase catalytic subunit A isoform 2 OS=Drosophila melanogaster OX=7227 GN=Vha68-2 PE=1 SV=2	-0.239902		>sp|Q9VMN5|CH60C_DROME 60 kDa heat shock protein homolog 2, mitochondrial OS=Drosophila melanogaster OX=7227 GN=Hsp60C PE=2 SV=2	-0.0677083
>sp|Q27331|VATA2_DROME V-type proton ATPase catalytic subunit A isoform 2 OS=Drosophila melanogaster OX=7227 GN=Vha68-2 PE=1 SV=2	-0.239902		>sp|Q9VMN5|CH60C_DROME 60 kDa heat shock protein homolog 2, mitochondrial OS=Drosophila melanogaster OX=7227 GN=Hsp60C PE=2 SV=2	-0.0677083
>sp|Q27331|VATA2_DROME V-type proton ATPase catalytic subunit A isoform 2 OS=Drosophila melanogaster OX=7227 GN=Vha68-2 PE=1 SV=2	-0.239902		>sp|Q9VMN5|CH60C_DROME 60 kDa heat shock protein homolog 2, mitochondrial OS=Drosophila melanogaster OX=7227 GN=Hsp60C PE=2 SV=2	-0.0677083
>sp|Q9V345|CSN4_DROME COP9 signalosome complex subunit 4 OS=Drosophila melanogaster OX=7227 GN=CSN4 PE=1 SV=1	-0.240295		>tr|Q7K4Y0|Q7K4Y0_DROME Desaturase 1, isoform A OS=Drosophila melanogaster OX=7227 GN=Desat1 PE=1 SV=1	-0.0678851
>tr|Q9V3N7|Q9V3N7_DROME BcDNA.HL02693 OS=Drosophila melanogaster OX=7227 GN=CRMP PE=1 SV=1	-0.240917		>tr|Q7K4Y0|Q7K4Y0_DROME Desaturase 1, isoform A OS=Drosophila melanogaster OX=7227 GN=Desat1 PE=1 SV=1	-0.0678851
>tr|Q9V3N7|Q9V3N7_DROME BcDNA.HL02693 OS=Drosophila melanogaster OX=7227 GN=CRMP PE=1 SV=1	-0.240917		>tr|Q7K4Y0|Q7K4Y0_DROME Desaturase 1, isoform A OS=Drosophila melanogaster OX=7227 GN=Desat1 PE=1 SV=1	-0.0678851
>sp|Q9VA12|PSA4L_DROME Proteasome subunit alpha type-4-like OS=Drosophila melanogaster OX=7227 GN=Prosalpha3T PE=2 SV=1	-0.241833		>tr|Q9VDC3|Q9VDC3_DROME AP complex subunit sigma OS=Drosophila melanogaster OX=7227 GN=AP-2sigma PE=1 SV=1	-0.0683099
>tr|M9PCA6|M9PCA6_DROME Beta galactosidase, isoform B OS=Drosophila melanogaster OX=7227 GN=Gal PE=1 SV=1	-0.242239		>sp|Q9VAN0|SERC_DROME Probable phosphoserine aminotransferase OS=Drosophila melanogaster OX=7227 GN=CG11899 PE=2 SV=1	-0.0686813
>tr|M9ND31|M9ND31_DROME Glucosamine-6-phosphate isomerase OS=Drosophila melanogaster OX=7227 GN=Oscillin PE=3 SV=1	-0.242279		>sp|Q9VAN0|SERC_DROME Probable phosphoserine aminotransferase OS=Drosophila melanogaster OX=7227 GN=CG11899 PE=2 SV=1	-0.0686813
>tr|M9ND31|M9ND31_DROME Glucosamine-6-phosphate isomerase OS=Drosophila melanogaster OX=7227 GN=Oscillin PE=3 SV=1	-0.242279		>sp|Q9VAN0|SERC_DROME Probable phosphoserine aminotransferase OS=Drosophila melanogaster OX=7227 GN=CG11899 PE=2 SV=1	-0.0686813
>tr|M9ND31|M9ND31_DROME Glucosamine-6-phosphate isomerase OS=Drosophila melanogaster OX=7227 GN=Oscillin PE=3 SV=1	-0.242279		>sp|Q7KW39|MMSA_DROME Probable methylmalonate-semialdehyde dehydrogenase [acylating], mitochondrial OS=Drosophila melanogaster OX=7227 GN=CG17896 PE=2 SV=1	-0.0690385
>sp|Q02748|IF4A_DROME Eukaryotic initiation factor 4A OS=Drosophila melanogaster OX=7227 GN=eIF4A PE=1 SV=3	-0.242432		>sp|Q7KW39|MMSA_DROME Probable methylmalonate-semialdehyde dehydrogenase [acylating], mitochondrial OS=Drosophila melanogaster OX=7227 GN=CG17896 PE=2 SV=1	-0.0690385
>sp|Q02748|IF4A_DROME Eukaryotic initiation factor 4A OS=Drosophila melanogaster OX=7227 GN=eIF4A PE=1 SV=3	-0.242432		>sp|Q7KW39|MMSA_DROME Probable methylmalonate-semialdehyde dehydrogenase [acylating], mitochondrial OS=Drosophila melanogaster OX=7227 GN=CG17896 PE=2 SV=1	-0.0690385
>sp|Q02748|IF4A_DROME Eukaryotic initiation factor 4A OS=Drosophila melanogaster OX=7227 GN=eIF4A PE=1 SV=3	-0.242432		>tr|Q6IGN6|Q6IGN6_DROME HDC05827 OS=Drosophila melanogaster OX=7227 GN=Dmel\CG34228 PE=1 SV=1	-0.0693182
>tr|Q95RS6|Q95RS6_DROME IP12536p OS=Drosophila melanogaster OX=7227 GN=BcDNA:LD13269 PE=2 SV=1	-0.24323		>tr|Q6IGN6|Q6IGN6_DROME HDC05827 OS=Drosophila melanogaster OX=7227 GN=Dmel\CG34228 PE=1 SV=1	-0.0693182
>tr|M9MS37|M9MS37_DROME Protein kinase, cAMP-dependent, regulatory subunit type 1, isoform Z OS=Drosophila melanogaster OX=7227 GN=Pka-R1 PE=1 SV=1	-0.243438		>tr|Q9VHY6|Q9VHY6_DROME ER membrane protein complex 1, isoform A OS=Drosophila melanogaster OX=7227 GN=EMC1 PE=1 SV=1	-0.0693989
>tr|M9MS37|M9MS37_DROME Protein kinase, cAMP-dependent, regulatory subunit type 1, isoform Z OS=Drosophila melanogaster OX=7227 GN=Pka-R1 PE=1 SV=1	-0.243438		>tr|Q9VHY6|Q9VHY6_DROME ER membrane protein complex 1, isoform A OS=Drosophila melanogaster OX=7227 GN=EMC1 PE=1 SV=1	-0.0693989
>sp|P07764|ALF_DROME Fructose-bisphosphate aldolase OS=Drosophila melanogaster OX=7227 GN=Ald1 PE=1 SV=5	-0.24349		>tr|Q9VHY6|Q9VHY6_DROME ER membrane protein complex 1, isoform A OS=Drosophila melanogaster OX=7227 GN=EMC1 PE=1 SV=1	-0.0693989
>sp|P07764|ALF_DROME Fructose-bisphosphate aldolase OS=Drosophila melanogaster OX=7227 GN=Ald1 PE=1 SV=5	-0.24349		>tr|Q9VQR0|Q9VQR0_DROME FI04421p OS=Drosophila melanogaster OX=7227 GN=Dmel\CG3246 PE=1 SV=1	-0.0696629
>sp|P07764|ALF_DROME Fructose-bisphosphate aldolase OS=Drosophila melanogaster OX=7227 GN=Ald1 PE=1 SV=5	-0.24349		>tr|Q9VQR0|Q9VQR0_DROME FI04421p OS=Drosophila melanogaster OX=7227 GN=Dmel\CG3246 PE=1 SV=1	-0.0696629
>tr|Q9VCW6|Q9VCW6_DROME GH03051p OS=Drosophila melanogaster OX=7227 GN=Gclm PE=1 SV=1	-0.24386		>tr|X2J9A5|X2J9A5_DROME Uncharacterized protein, isoform B OS=Drosophila melanogaster OX=7227 GN=CCG31673 PE=1 SV=1	-0.0698462
>tr|Q9VCW6|Q9VCW6_DROME GH03051p OS=Drosophila melanogaster OX=7227 GN=Gclm PE=1 SV=1	-0.24386		>tr|X2J9A5|X2J9A5_DROME Uncharacterized protein, isoform B OS=Drosophila melanogaster OX=7227 GN=CCG31673 PE=1 SV=1	-0.0698462
>tr|Q9VCW6|Q9VCW6_DROME GH03051p OS=Drosophila melanogaster OX=7227 GN=Gclm PE=1 SV=1	-0.24386		>tr|X2J9A5|X2J9A5_DROME Uncharacterized protein, isoform B OS=Drosophila melanogaster OX=7227 GN=CCG31673 PE=1 SV=1	-0.0698462
>tr|Q9W2J6|Q9W2J6_DROME Glycogenin, isoform B OS=Drosophila melanogaster OX=7227 GN=Gyg PE=1 SV=3	-0.244745		>sp|Q8MS59|WAT_DROME Fatty acyl-CoA reductase wat OS=Drosophila melanogaster OX=7227 GN=wat PE=1 SV=1	-0.0700193
>tr|Q9W2J6|Q9W2J6_DROME Glycogenin, isoform B OS=Drosophila melanogaster OX=7227 GN=Gyg PE=1 SV=3	-0.244745		>sp|Q9VTX8|ODR4_DROME Protein odr-4 homolog OS=Drosophila melanogaster OX=7227 GN=CG10616 PE=3 SV=2	-0.0703252
>tr|Q9W2J6|Q9W2J6_DROME Glycogenin, isoform B OS=Drosophila melanogaster OX=7227 GN=Gyg PE=1 SV=3	-0.244745		>tr|A1ZBQ4|A1ZBQ4_DROME Odorant-binding protein 56g OS=Drosophila melanogaster OX=7227 GN=Obp56g PE=4 SV=1	-0.0704545
>sp|Q94516|AT5F1_DROME ATP synthase subunit b, mitochondrial OS=Drosophila melanogaster OX=7227 GN=ATPsynB PE=2 SV=2	-0.245679		>tr|A1ZBQ4|A1ZBQ4_DROME Odorant-binding protein 56g OS=Drosophila melanogaster OX=7227 GN=Obp56g PE=4 SV=1	-0.0704545
>tr|Q9VTY2|Q9VTY2_DROME Uncharacterized protein, isoform A OS=Drosophila melanogaster OX=7227 GN=anon-WO0172774.89 PE=1 SV=1	-0.245741		>tr|A1ZBQ4|A1ZBQ4_DROME Odorant-binding protein 56g OS=Drosophila melanogaster OX=7227 GN=Obp56g PE=4 SV=1	-0.0704545
>tr|Q9VTY2|Q9VTY2_DROME Uncharacterized protein, isoform A OS=Drosophila melanogaster OX=7227 GN=anon-WO0172774.89 PE=1 SV=1	-0.245741		>tr|Q9VN44|Q9VN44_DROME FI07923p OS=Drosophila melanogaster OX=7227 GN=Karybeta3 PE=1 SV=1	-0.0714932
>tr|Q9VTY2|Q9VTY2_DROME Uncharacterized protein, isoform A OS=Drosophila melanogaster OX=7227 GN=anon-WO0172774.89 PE=1 SV=1	-0.245741		>tr|Q9VN44|Q9VN44_DROME FI07923p OS=Drosophila melanogaster OX=7227 GN=Karybeta3 PE=1 SV=1	-0.0714932
>tr|Q9VSR8|Q9VSR8_DROME Amino_oxidase domain-containing protein OS=Drosophila melanogaster OX=7227 GN=Dmel\CG5653 PE=1 SV=1	-0.246218		>tr|Q9VN44|Q9VN44_DROME FI07923p OS=Drosophila melanogaster OX=7227 GN=Karybeta3 PE=1 SV=1	-0.0714932
>tr|Q9VSR8|Q9VSR8_DROME Amino_oxidase domain-containing protein OS=Drosophila melanogaster OX=7227 GN=Dmel\CG5653 PE=1 SV=1	-0.246218		>tr|Q9VFN5|Q9VFN5_DROME AT30951p OS=Drosophila melanogaster OX=7227 GN=anon-WO0140519.48 PE=1 SV=1	-0.0715686
>tr|Q9VSR8|Q9VSR8_DROME Amino_oxidase domain-containing protein OS=Drosophila melanogaster OX=7227 GN=Dmel\CG5653 PE=1 SV=1	-0.246218		>tr|Q9VFN5|Q9VFN5_DROME AT30951p OS=Drosophila melanogaster OX=7227 GN=anon-WO0140519.48 PE=1 SV=1	-0.0715686
>sp|Q9VAD6|COG7_DROME Conserved oligomeric Golgi complex subunit 7 OS=Drosophila melanogaster OX=7227 GN=Cog7 PE=2 SV=2	-0.246361		>tr|Q9VFN5|Q9VFN5_DROME AT30951p OS=Drosophila melanogaster OX=7227 GN=anon-WO0140519.48 PE=1 SV=1	-0.0715686
>sp|Q24186|RS5A_DROME 40S ribosomal protein S5a OS=Drosophila melanogaster OX=7227 GN=RpS5a PE=1 SV=1	-0.246491		>tr|M9PI37|M9PI37_DROME Sodium chloride cotransporter 69, isoform E OS=Drosophila melanogaster OX=7227 GN=Ncc69 PE=1 SV=1	-0.0717481
>sp|P38979|RSSA_DROME 40S ribosomal protein SA OS=Drosophila melanogaster OX=7227 GN=sta PE=1 SV=3	-0.246667		>tr|M9PI37|M9PI37_DROME Sodium chloride cotransporter 69, isoform E OS=Drosophila melanogaster OX=7227 GN=Ncc69 PE=1 SV=1	-0.0717481
>sp|P38979|RSSA_DROME 40S ribosomal protein SA OS=Drosophila melanogaster OX=7227 GN=sta PE=1 SV=3	-0.246667		>tr|Q8IPE8|Q8IPE8_DROME Mitochondrial trifunctional protein alpha subunit, isoform B OS=Drosophila melanogaster OX=7227 GN=Mtpalpha PE=1 SV=1	-0.0723118
>sp|P38979|RSSA_DROME 40S ribosomal protein SA OS=Drosophila melanogaster OX=7227 GN=sta PE=1 SV=3	-0.246667		>tr|Q8IPE8|Q8IPE8_DROME Mitochondrial trifunctional protein alpha subunit, isoform B OS=Drosophila melanogaster OX=7227 GN=Mtpalpha PE=1 SV=1	-0.0723118
>tr|A8JRC1|A8JRC1_DROME Uncharacterized protein, isoform D OS=Drosophila melanogaster OX=7227 GN=Dmel\CG5028 PE=1 SV=1	-0.247074		>tr|Q8IPE8|Q8IPE8_DROME Mitochondrial trifunctional protein alpha subunit, isoform B OS=Drosophila melanogaster OX=7227 GN=Mtpalpha PE=1 SV=1	-0.0723118
>tr|A8JRC1|A8JRC1_DROME Uncharacterized protein, isoform D OS=Drosophila melanogaster OX=7227 GN=Dmel\CG5028 PE=1 SV=1	-0.247074		>tr|A1ZAY4|A1ZAY4_DROME FI05907p1 OS=Drosophila melanogaster OX=7227 GN=Dmel\CG4984 PE=2 SV=1	-0.0725
>tr|A8JRC1|A8JRC1_DROME Uncharacterized protein, isoform D OS=Drosophila melanogaster OX=7227 GN=Dmel\CG5028 PE=1 SV=1	-0.247074		>tr|Q9VWI9|Q9VWI9_DROME Nicotinic acetylcholine receptor alpha7, isoform A OS=Drosophila melanogaster OX=7227 GN=nAChRalpha7 PE=3 SV=4	-0.0741071
>sp|P41043|GSTS1_DROME Glutathione S-transferase S1 OS=Drosophila melanogaster OX=7227 GN=GstS1 PE=1 SV=2	-0.24739		>sp|Q9VMQ5|COQ6_DROME Ubiquinone biosynthesis monooxygenase COQ6, mitochondrial OS=Drosophila melanogaster OX=7227 GN=Coq6 PE=2 SV=1	-0.0748428
>sp|P41043|GSTS1_DROME Glutathione S-transferase S1 OS=Drosophila melanogaster OX=7227 GN=GstS1 PE=1 SV=2	-0.24739		>sp|Q9VMQ5|COQ6_DROME Ubiquinone biosynthesis monooxygenase COQ6, mitochondrial OS=Drosophila melanogaster OX=7227 GN=Coq6 PE=2 SV=1	-0.0748428
>sp|P41043|GSTS1_DROME Glutathione S-transferase S1 OS=Drosophila melanogaster OX=7227 GN=GstS1 PE=1 SV=2	-0.24739		>sp|Q9VMQ5|COQ6_DROME Ubiquinone biosynthesis monooxygenase COQ6, mitochondrial OS=Drosophila melanogaster OX=7227 GN=Coq6 PE=2 SV=1	-0.0748428
>tr|Q9VLX0|Q9VLX0_DROME Lysine ketoglutarate reductase/saccharopine dehydrogenase, isoform A OS=Drosophila melanogaster OX=7227 GN=LKRSDH PE=1 SV=2	-0.248815		>tr|Q7JYH3|Q7JYH3_DROME NADH dehydrogenase (Ubiquinone) B14.7 subunit OS=Drosophila melanogaster OX=7227 GN=ND-B14.7 PE=1 SV=1	-0.0752941
>tr|Q9VV60|Q9VV60_DROME Tyrosine--tRNA ligase OS=Drosophila melanogaster OX=7227 GN=TyrRS PE=1 SV=1	-0.249524		>tr|Q7JYH3|Q7JYH3_DROME NADH dehydrogenase (Ubiquinone) B14.7 subunit OS=Drosophila melanogaster OX=7227 GN=ND-B14.7 PE=1 SV=1	-0.0752941
>tr|Q9VV60|Q9VV60_DROME Tyrosine--tRNA ligase OS=Drosophila melanogaster OX=7227 GN=TyrRS PE=1 SV=1	-0.249524		>tr|Q7JYH3|Q7JYH3_DROME NADH dehydrogenase (Ubiquinone) B14.7 subunit OS=Drosophila melanogaster OX=7227 GN=ND-B14.7 PE=1 SV=1	-0.0752941
>tr|Q2PDP5|Q2PDP5_DROME Uncharacterized protein, isoform F OS=Drosophila melanogaster OX=7227 GN=Dmel\CG34041 PE=4 SV=3	-0.250528		>tr|Q9VSM6|Q9VSM6_DROME AT03383p OS=Drosophila melanogaster OX=7227 GN=S-Lap1 PE=2 SV=2	-0.0753153
>tr|M9PG65|M9PG65_DROME Seminal fluid protein 78E, isoform B OS=Drosophila melanogaster OX=7227 GN=Sfp78E PE=4 SV=1	-0.250667		>tr|Q9VSM6|Q9VSM6_DROME AT03383p OS=Drosophila melanogaster OX=7227 GN=S-Lap1 PE=2 SV=2	-0.0753153
>tr|Q8SWX4|Q8SWX4_DROME Aminopeptidase OS=Drosophila melanogaster OX=7227 GN=CG5839 PE=1 SV=1	-0.250676		>tr|Q7PLB8|Q7PLB8_DROME Fatty acid synthase 3 OS=Drosophila melanogaster OX=7227 GN=FASN3 PE=1 SV=3	-0.0754804
>tr|Q9VQ61|Q9VQ61_DROME Aspartate aminotransferase OS=Drosophila melanogaster OX=7227 GN=Got2 PE=1 SV=1	-0.252123		>tr|Q9VAG9|Q9VAG9_DROME LD34542p OS=Drosophila melanogaster OX=7227 GN=Dmel\CG7789 PE=1 SV=1	-0.075817
>tr|Q9VQ61|Q9VQ61_DROME Aspartate aminotransferase OS=Drosophila melanogaster OX=7227 GN=Got2 PE=1 SV=1	-0.252123		>tr|Q9VVG5|Q9VVG5_DROME RH19679p OS=Drosophila melanogaster OX=7227 GN=Dmel\CG7630 PE=1 SV=2	-0.0766667
>tr|Q9VQ61|Q9VQ61_DROME Aspartate aminotransferase OS=Drosophila melanogaster OX=7227 GN=Got2 PE=1 SV=1	-0.252123		>tr|Q9VVG5|Q9VVG5_DROME RH19679p OS=Drosophila melanogaster OX=7227 GN=Dmel\CG7630 PE=1 SV=2	-0.0766667
>sp|P48461|PP11_DROME Serine/threonine-protein phosphatase alpha-1 isoform OS=Drosophila melanogaster OX=7227 GN=Pp1alpha-96A PE=1 SV=1	-0.252294		>tr|Q9VVG5|Q9VVG5_DROME RH19679p OS=Drosophila melanogaster OX=7227 GN=Dmel\CG7630 PE=1 SV=2	-0.0766667
>tr|A1Z7H3|A1Z7H3_DROME Acyl-CoA synthetase long-chain, isoform C OS=Drosophila melanogaster OX=7227 GN=Acsl PE=1 SV=1	-0.252334		>sp|P29613|TPIS_DROME Triosephosphate isomerase OS=Drosophila melanogaster OX=7227 GN=Tpi PE=1 SV=3	-0.0773279
>tr|Q9VH09|Q9VH09_DROME Glycine cleavage system P protein OS=Drosophila melanogaster OX=7227 GN=Dmel\CG3999 PE=1 SV=1	-0.252487		>sp|P29613|TPIS_DROME Triosephosphate isomerase OS=Drosophila melanogaster OX=7227 GN=Tpi PE=1 SV=3	-0.0773279
>sp|Q9VTE9|ULA1_DROME Nedd8-activating enzyme E1 regulatory subunit OS=Drosophila melanogaster OX=7227 GN=APP-BP1 PE=1 SV=1	-0.253244		>sp|P29613|TPIS_DROME Triosephosphate isomerase OS=Drosophila melanogaster OX=7227 GN=Tpi PE=1 SV=3	-0.0773279
>sp|Q9VYH3|PEPE_DROME Probable alpha-aspartyl dipeptidase OS=Drosophila melanogaster OX=7227 GN=CG2200 PE=2 SV=1	-0.253333		>sp|Q9VED0|TAPT1_DROME Protein TAPT1 homolog OS=Drosophila melanogaster OX=7227 GN=CG7218 PE=2 SV=2	-0.0778107
>tr|Q7YU05|Q7YU05_DROME Pyruvate dehydrogenase E1 component subunit alpha OS=Drosophila melanogaster OX=7227 GN=Pdha PE=1 SV=1	-0.253354		>tr|Q9VIS3|Q9VIS3_DROME Fructose-1,6-bisphosphatase OS=Drosophila melanogaster OX=7227 GN=fbp PE=1 SV=1	-0.0790419
>tr|Q9V9V4|Q9V9V4_DROME CRAL-TRIO domain-containing protein OS=Drosophila melanogaster OX=7227 GN=Dmel\CG11550 PE=1 SV=1	-0.253356		>tr|Q9VIS3|Q9VIS3_DROME Fructose-1,6-bisphosphatase OS=Drosophila melanogaster OX=7227 GN=fbp PE=1 SV=1	-0.0790419
>tr|Q9V9V4|Q9V9V4_DROME CRAL-TRIO domain-containing protein OS=Drosophila melanogaster OX=7227 GN=Dmel\CG11550 PE=1 SV=1	-0.253356		>tr|Q9VIS3|Q9VIS3_DROME Fructose-1,6-bisphosphatase OS=Drosophila melanogaster OX=7227 GN=fbp PE=1 SV=1	-0.0790419
>tr|Q9VCV9|Q9VCV9_DROME FI18835p1 OS=Drosophila melanogaster OX=7227 GN=Dmel\CG6972 PE=2 SV=1	-0.253559		>sp|Q24319|OST48_DROME Dolichyl-diphosphooligosaccharide--protein glycosyltransferase 48 kDa subunit OS=Drosophila melanogaster OX=7227 GN=Ost48 PE=2 SV=2	-0.0792873
>sp|O77059|CRY1_DROME Cryptochrome-1 OS=Drosophila melanogaster OX=7227 GN=cry PE=1 SV=1	-0.253875		>sp|Q24319|OST48_DROME Dolichyl-diphosphooligosaccharide--protein glycosyltransferase 48 kDa subunit OS=Drosophila melanogaster OX=7227 GN=Ost48 PE=2 SV=2	-0.0792873
>tr|Q7KTW9|Q7KTW9_DROME Asparagine synthetase OS=Drosophila melanogaster OX=7227 GN=AsnS PE=2 SV=1	-0.253943		>sp|Q24319|OST48_DROME Dolichyl-diphosphooligosaccharide--protein glycosyltransferase 48 kDa subunit OS=Drosophila melanogaster OX=7227 GN=Ost48 PE=2 SV=2	-0.0792873
>tr|Q9VHX4|Q9VHX4_DROME LD24679p OS=Drosophila melanogaster OX=7227 GN=Dmel\CG2767 PE=1 SV=1	-0.254103		>tr|Q9VW57|Q9VW57_DROME Grasp65 OS=Drosophila melanogaster OX=7227 GN=Grasp65 PE=1 SV=1	-0.0793478
>tr|Q9VHX4|Q9VHX4_DROME LD24679p OS=Drosophila melanogaster OX=7227 GN=Dmel\CG2767 PE=1 SV=1	-0.254103		>tr|Q9VII7|Q9VII7_DROME Serpin 38F, isoform A OS=Drosophila melanogaster OX=7227 GN=Spn38F PE=3 SV=3	-0.0798387
>tr|Q9VHX4|Q9VHX4_DROME LD24679p OS=Drosophila melanogaster OX=7227 GN=Dmel\CG2767 PE=1 SV=1	-0.254103		>tr|Q9VII7|Q9VII7_DROME Serpin 38F, isoform A OS=Drosophila melanogaster OX=7227 GN=Spn38F PE=3 SV=3	-0.0798387
>tr|Q95RI2|Q95RI2_DROME LD28549p OS=Drosophila melanogaster OX=7227 GN=Dmel\CG10973 PE=1 SV=1	-0.254248		>tr|Q9VII7|Q9VII7_DROME Serpin 38F, isoform A OS=Drosophila melanogaster OX=7227 GN=Spn38F PE=3 SV=3	-0.0798387
>tr|Q9W2I2|Q9W2I2_DROME Queuosine salvage protein OS=Drosophila melanogaster OX=7227 GN=Dmel\CG9752 PE=1 SV=1	-0.254519		>sp|Q9V3Y3|DFP_DROME Defense protein l(2)34Fc OS=Drosophila melanogaster OX=7227 GN=l(2)34Fc PE=2 SV=1	-0.0798742
>tr|Q9VDC9|Q9VDC9_DROME O-GlcNAcase OS=Drosophila melanogaster OX=7227 GN=Oga PE=1 SV=1	-0.255348		>sp|Q9V3Y3|DFP_DROME Defense protein l(2)34Fc OS=Drosophila melanogaster OX=7227 GN=l(2)34Fc PE=2 SV=1	-0.0798742
>sp|A0A1F4|EYS_DROME Protein eyes shut OS=Drosophila melanogaster OX=7227 GN=eys PE=1 SV=1	-0.255836		>tr|Q0KHZ6|Q0KHZ6_DROME Uncharacterized protein, isoform A OS=Drosophila melanogaster OX=7227 GN=ETFB PE=1 SV=1	-0.0802372
>sp|A0A1F4|EYS_DROME Protein eyes shut OS=Drosophila melanogaster OX=7227 GN=eys PE=1 SV=1	-0.255836		>tr|Q0KHZ6|Q0KHZ6_DROME Electron transfer flavoprotein subunit beta OS=Drosophila melanogaster OX=7227 GN=ETFB PE=1 SV=1	-0.0802372
>sp|A0A1F4|EYS_DROME Protein eyes shut OS=Drosophila melanogaster OX=7227 GN=eys PE=1 SV=1	-0.255836		>tr|Q0KHZ6|Q0KHZ6_DROME Electron transfer flavoprotein subunit beta OS=Drosophila melanogaster OX=7227 GN=ETFB PE=1 SV=1	-0.0802372
>sp|P08736|EF1A1_DROME Elongation factor 1-alpha 1 OS=Drosophila melanogaster OX=7227 GN=eEF1alpha1 PE=1 SV=2	-0.25594		>sp|P55162|HEM_DROME Membrane-associated protein Hem OS=Drosophila melanogaster OX=7227 GN=Hem PE=2 SV=1	-0.0812611
>sp|P08736|EF1A1_DROME Elongation factor 1-alpha 1 OS=Drosophila melanogaster OX=7227 GN=eEF1alpha1 PE=1 SV=2	-0.25594		>sp|P55162|HEM_DROME Membrane-associated protein Hem OS=Drosophila melanogaster OX=7227 GN=Hem PE=2 SV=1	-0.0812611
>tr|Q8INH5|Q8INH5_DROME Aminopeptidase OS=Drosophila melanogaster OX=7227 GN=CG11688 PE=1 SV=1	-0.257364		>sp|P55162|HEM_DROME Membrane-associated protein Hem OS=Drosophila melanogaster OX=7227 GN=Hem PE=2 SV=1	-0.0812611
>tr|Q9VY04|Q9VY04_DROME Fezzik, isoform A OS=Drosophila melanogaster OX=7227 GN=fiz PE=3 SV=1	-0.257895		>sp|P48149|RS15A_DROME 40S ribosomal protein S15Aa OS=Drosophila melanogaster OX=7227 GN=RpS15Aa PE=1 SV=2	-0.0815385
>sp|P22464|ANXB9_DROME Annexin B9 OS=Drosophila melanogaster OX=7227 GN=AnxB9 PE=2 SV=2	-0.258025		>sp|P48149|RS15A_DROME 40S ribosomal protein S15Aa OS=Drosophila melanogaster OX=7227 GN=RpS15Aa PE=1 SV=2	-0.0815385
>sp|P22464|ANXB9_DROME Annexin B9 OS=Drosophila melanogaster OX=7227 GN=AnxB9 PE=2 SV=2	-0.258025		>sp|P48149|RS15A_DROME 40S ribosomal protein S15Aa OS=Drosophila melanogaster OX=7227 GN=RpS15Aa PE=1 SV=2	-0.0815385
>sp|P22464|ANXB9_DROME Annexin B9 OS=Drosophila melanogaster OX=7227 GN=AnxB9 PE=2 SV=2	-0.258025		>sp|P45437|COPB_DROME Coatomer subunit beta OS=Drosophila melanogaster OX=7227 GN=betaCOP PE=2 SV=2	-0.081639
>tr|Q9VLM9|Q9VLM9_DROME GH05949p OS=Drosophila melanogaster OX=7227 GN=15010468 PE=1 SV=1	-0.258431		>sp|P45437|COPB_DROME Coatomer subunit beta OS=Drosophila melanogaster OX=7227 GN=betaCOP PE=2 SV=2	-0.081639
>tr|X2JDI9|X2JDI9_DROME Uncharacterized protein, isoform C OS=Drosophila melanogaster OX=7227 GN=Dmel\CG12560 PE=1 SV=1	-0.261029		>sp|P45437|COPB_DROME Coatomer subunit beta OS=Drosophila melanogaster OX=7227 GN=betaCOP PE=2 SV=2	-0.081639
>tr|X2JDI9|X2JDI9_DROME Uncharacterized protein, isoform C OS=Drosophila melanogaster OX=7227 GN=Dmel\CG12560 PE=1 SV=1	-0.261029		>tr|Q9VUW4|Q9VUW4_DROME Inositol-1-monophosphatase OS=Drosophila melanogaster OX=7227 GN=IMP PE=1 SV=1	-0.0819444
>sp|Q9W1X8|FCL_DROME Probable GDP-L-fucose synthase OS=Drosophila melanogaster OX=7227 GN=Gmer PE=2 SV=1	-0.261059		>sp|Q9W4P5|VA0D1_DROME V-type proton ATPase subunit d 1 OS=Drosophila melanogaster OX=7227 GN=VhaAC39-1 PE=2 SV=1	-0.0822857
>tr|A0A0B4KGC6|A0A0B4KGC6_DROME Like-AP180, isoform H OS=Drosophila melanogaster OX=7227 GN=lap PE=1 SV=1	-0.261364		>sp|Q9W4P5|VA0D1_DROME V-type proton ATPase subunit d 1 OS=Drosophila melanogaster OX=7227 GN=VhaAC39-1 PE=2 SV=1	-0.0822857
>tr|Q9VIH3|Q9VIH3_DROME Microsomal triacylglycerol transfer protein OS=Drosophila melanogaster OX=7227 GN=Mtp PE=1 SV=2	-0.2614		>sp|Q9W4P5|VA0D1_DROME V-type proton ATPase subunit d 1 OS=Drosophila melanogaster OX=7227 GN=VhaAC39-1 PE=2 SV=1	-0.0822857
>tr|Q9VBG7|Q9VBG7_DROME Uncharacterized protein, isoform A OS=Drosophila melanogaster OX=7227 GN=Dmel\CG31086 PE=1 SV=2	-0.261486		>tr|Q9VXC9|Q9VXC9_DROME RH40504p OS=Drosophila melanogaster OX=7227 GN=SP99 PE=2 SV=1	-0.0828685
>tr|Q9VBG7|Q9VBG7_DROME Uncharacterized protein, isoform A OS=Drosophila melanogaster OX=7227 GN=Dmel\CG31086 PE=1 SV=2	-0.261486		>tr|Q9VXC9|Q9VXC9_DROME RH40504p OS=Drosophila melanogaster OX=7227 GN=SP99 PE=2 SV=1	-0.0828685
>tr|Q9VBG7|Q9VBG7_DROME Uncharacterized protein, isoform A OS=Drosophila melanogaster OX=7227 GN=Dmel\CG31086 PE=1 SV=2	-0.261486		>tr|Q9VXC9|Q9VXC9_DROME RH40504p OS=Drosophila melanogaster OX=7227 GN=SP99 PE=2 SV=1	-0.0828685
>tr|Q95WY3|Q95WY3_DROME FI04781p OS=Drosophila melanogaster OX=7227 GN=Nop56 PE=1 SV=1	-0.261492		>tr|A1Z8Z9|A1Z8Z9_DROME Uncharacterized protein OS=Drosophila melanogaster OX=7227 GN=mdcds_23070 PE=1 SV=1	-0.0829907
>tr|Q7KTW5|Q7KTW5_DROME Inositol-1-monophosphatase OS=Drosophila melanogaster OX=7227 GN=Dmel\CG9391 PE=1 SV=1	-0.261511		>tr|A1Z8Z9|A1Z8Z9_DROME Uncharacterized protein OS=Drosophila melanogaster OX=7227 GN=mdcds_23070 PE=1 SV=1	-0.0829907
>tr|Q7KTW5|Q7KTW5_DROME Inositol-1-monophosphatase OS=Drosophila melanogaster OX=7227 GN=Dmel\CG9391 PE=1 SV=1	-0.261511		>tr|A1Z8Z9|A1Z8Z9_DROME Uncharacterized protein OS=Drosophila melanogaster OX=7227 GN=mdcds_23070 PE=1 SV=1	-0.0829907
>tr|Q7KTW5|Q7KTW5_DROME Inositol-1-monophosphatase OS=Drosophila melanogaster OX=7227 GN=Dmel\CG9391 PE=1 SV=1	-0.261511		>tr|Q7JY99|Q7JY99_DROME RE20574p OS=Drosophila melanogaster OX=7227 GN=Dmel\CG8298 PE=2 SV=1	-0.0832215
>tr|Q7JVI6|Q7JVI6_DROME Glutathione S transferase E13, isoform A OS=Drosophila melanogaster OX=7227 GN=GstE13 PE=1 SV=1	-0.261947		>tr|Q7JY99|Q7JY99_DROME RE20574p OS=Drosophila melanogaster OX=7227 GN=Dmel\CG8298 PE=2 SV=1	-0.0832215
>tr|Q7JVI6|Q7JVI6_DROME Glutathione S transferase E13, isoform A OS=Drosophila melanogaster OX=7227 GN=GstE13 PE=1 SV=1	-0.261947		>tr|Q9VRV8|Q9VRV8_DROME FI21453p1 OS=Drosophila melanogaster OX=7227 GN=Tnpo PE=1 SV=1	-0.0833147
>tr|Q7JVI6|Q7JVI6_DROME Glutathione S transferase E13, isoform A OS=Drosophila melanogaster OX=7227 GN=GstE13 PE=1 SV=1	-0.261947		>tr|Q9VRV8|Q9VRV8_DROME FI21453p1 OS=Drosophila melanogaster OX=7227 GN=Tnpo PE=1 SV=1	-0.0833147
>tr|Q9VX70|Q9VX70_DROME IP12247p OS=Drosophila melanogaster OX=7227 GN=CT41369 PE=2 SV=2	-0.262179		>sp|P05623|A70A_DROME Accessory gland-specific peptide 70A OS=Drosophila melanogaster OX=7227 GN=SP PE=1 SV=1	-0.0836364
>sp|O76464|NFT1_DROME Nitrilase and fragile histidine triad fusion protein NitFhit OS=Drosophila melanogaster OX=7227 GN=NitFhit PE=1 SV=1	-0.262609		>sp|P05623|A70A_DROME Accessory gland-specific peptide 70A OS=Drosophila melanogaster OX=7227 GN=SP PE=1 SV=1	-0.0836364
>sp|O76464|NFT1_DROME Nitrilase and fragile histidine triad fusion protein NitFhit OS=Drosophila melanogaster OX=7227 GN=NitFhit PE=1 SV=1	-0.262609		>tr|Q9W3F3|Q9W3F3_DROME RH03540p OS=Drosophila melanogaster OX=7227 GN=Dmel\CG15347 PE=1 SV=2	-0.0836449
>sp|O76464|NFT1_DROME Nitrilase and fragile histidine triad fusion protein NitFhit OS=Drosophila melanogaster OX=7227 GN=NitFhit PE=1 SV=1	-0.262609		>tr|Q9VFX5|Q9VFX5_DROME RE43130p OS=Drosophila melanogaster OX=7227 GN=Dmel\CG8630 PE=2 SV=2	-0.0838235
>tr|Q9VA09|Q9VA09_DROME Guanylyl cyclase beta-subunit at 100B OS=Drosophila melanogaster OX=7227 GN=Gycbeta100B PE=1 SV=1	-0.263278		>tr|Q9VFQ9|Q9VFQ9_DROME Dipeptidase B, isoform A OS=Drosophila melanogaster OX=7227 GN=Dip-B PE=1 SV=2	-0.084252
>sp|Q9VJG0|XPP_DROME Xaa-Pro aminopeptidase ApepP OS=Drosophila melanogaster OX=7227 GN=ApepP PE=1 SV=1	-0.263458		>tr|Q9VFQ9|Q9VFQ9_DROME Dipeptidase B, isoform A OS=Drosophila melanogaster OX=7227 GN=Dip-B PE=1 SV=2	-0.084252
>sp|Q9VJG0|XPP_DROME Xaa-Pro aminopeptidase ApepP OS=Drosophila melanogaster OX=7227 GN=ApepP PE=1 SV=1	-0.263458		>tr|Q9VFQ9|Q9VFQ9_DROME Dipeptidase B, isoform A OS=Drosophila melanogaster OX=7227 GN=Dip-B PE=1 SV=2	-0.084252
>sp|Q9VJG0|XPP_DROME Xaa-Pro aminopeptidase ApepP OS=Drosophila melanogaster OX=7227 GN=ApepP PE=1 SV=1	-0.263458		>sp|Q9VF71|CUTC_DROME Copper homeostasis protein cutC homolog OS=Drosophila melanogaster OX=7227 GN=CG6136 PE=2 SV=1	-0.0844106
>sp|Q9XZJ4|PSA6_DROME Proteasome subunit alpha type-6 OS=Drosophila melanogaster OX=7227 GN=Prosalpha1 PE=1 SV=2	-0.263525		>tr|Q9VDH5|Q9VDH5_DROME Kainate-type ionotropic glutamate receptor subunit 1D OS=Drosophila melanogaster OX=7227 GN=KaiR1D PE=1 SV=1	-0.0852286
>sp|P48602|VATA1_DROME V-type proton ATPase catalytic subunit A isoform 1 OS=Drosophila melanogaster OX=7227 GN=Vha68-1 PE=2 SV=2	-0.263844		>tr|Q9VDH5|Q9VDH5_DROME Kainate-type ionotropic glutamate receptor subunit 1D OS=Drosophila melanogaster OX=7227 GN=KaiR1D PE=1 SV=1	-0.0852286
>sp|P48602|VATA1_DROME V-type proton ATPase catalytic subunit A isoform 1 OS=Drosophila melanogaster OX=7227 GN=Vha68-1 PE=2 SV=2	-0.263844		>tr|Q7PL76|Q7PL76_DROME Vacuolar protein sorting-associated protein 41 homolog OS=Drosophila melanogaster OX=7227 GN=lt PE=2 SV=2	-0.0854935
>tr|A0A0B4KH10|A0A0B4KH10_DROME Signal transducer and activator of transcription OS=Drosophila melanogaster OX=7227 GN=Stat92E PE=3 SV=1	-0.264212		>tr|Q9W0X0|Q9W0X0_DROME Epithelial membrane protein, isoform B OS=Drosophila melanogaster OX=7227 GN=emp PE=3 SV=2	-0.0858439
>tr|A0A0B4KH10|A0A0B4KH10_DROME Signal transducer and activator of transcription OS=Drosophila melanogaster OX=7227 GN=Stat92E PE=3 SV=1	-0.264212		>tr|Q9W0X0|Q9W0X0_DROME Epithelial membrane protein, isoform B OS=Drosophila melanogaster OX=7227 GN=emp PE=3 SV=2	-0.0858439
>sp|Q9Y0Y7|LANC3_DROME LanC-like protein 3 homolog OS=Drosophila melanogaster OX=7227 GN=CG2061 PE=2 SV=1	-0.265155		>tr|Q9W0X0|Q9W0X0_DROME Epithelial membrane protein, isoform B OS=Drosophila melanogaster OX=7227 GN=emp PE=3 SV=2	-0.0858439
>sp|Q9VU68|WDR1_DROME Actin-interacting protein 1 OS=Drosophila melanogaster OX=7227 GN=flr PE=2 SV=1	-0.265625		>sp|Q95RA9|GILT1_DROME GILT-like protein 1 OS=Drosophila melanogaster OX=7227 GN=GILT1 PE=1 SV=1	-0.086
>sp|Q9VU68|WDR1_DROME Actin-interacting protein 1 OS=Drosophila melanogaster OX=7227 GN=flr PE=2 SV=1	-0.265625		>sp|Q95RA9|GILT1_DROME GILT-like protein 1 OS=Drosophila melanogaster OX=7227 GN=GILT1 PE=1 SV=1	-0.086
>sp|Q9VU68|WDR1_DROME Actin-interacting protein 1 OS=Drosophila melanogaster OX=7227 GN=flr PE=2 SV=1	-0.265625		>sp|Q95RA9|GILT1_DROME GILT-like protein 1 OS=Drosophila melanogaster OX=7227 GN=GILT1 PE=1 SV=1	-0.086
>tr|X2JDJ3|X2JDJ3_DROME Phosphatidic acid phospholipase A1, isoform D OS=Drosophila melanogaster OX=7227 GN=PAPLA1 PE=1 SV=1	-0.266501		>tr|Q7K088|Q7K088_DROME GEO08224p1 OS=Drosophila melanogaster OX=7227 GN=Obp56e PE=1 SV=1	-0.0863636
>tr|X2JDJ3|X2JDJ3_DROME Phosphatidic acid phospholipase A1, isoform D OS=Drosophila melanogaster OX=7227 GN=PAPLA1 PE=1 SV=1	-0.266501		>tr|Q7K088|Q7K088_DROME GEO08224p1 OS=Drosophila melanogaster OX=7227 GN=Obp56e PE=1 SV=1	-0.0863636
>tr|Q9VI66|Q9VI66_DROME GH28833p OS=Drosophila melanogaster OX=7227 GN=CG2640 PE=2 SV=2	-0.266932		>tr|Q7K088|Q7K088_DROME GEO08224p1 OS=Drosophila melanogaster OX=7227 GN=Obp56e PE=1 SV=1	-0.0863636
>sp|Q9V5C6|PSA3_DROME Proteasome subunit alpha type-3 OS=Drosophila melanogaster OX=7227 GN=Prosalpha7 PE=1 SV=1	-0.267194		>tr|Q9W4K0|Q9W4K0_DROME CHOp24, isoform A OS=Drosophila melanogaster OX=7227 GN=CHOp24 PE=1 SV=1	-0.0870192
>tr|Q86BP1|Q86BP1_DROME 3-hydroxyisobutyryl-CoA hydrolase, mitochondrial OS=Drosophila melanogaster OX=7227 GN=Dmel\CG5044 PE=1 SV=1	-0.267358		>tr|Q9W4K0|Q9W4K0_DROME CHOp24, isoform A OS=Drosophila melanogaster OX=7227 GN=CHOp24 PE=1 SV=1	-0.0870192
>tr|Q9W306|Q9W306_DROME GEO08256p1 OS=Drosophila melanogaster OX=7227 GN=CT27394 PE=1 SV=1	-0.267769		>tr|Q9W4K0|Q9W4K0_DROME CHOp24, isoform A OS=Drosophila melanogaster OX=7227 GN=CHOp24 PE=1 SV=1	-0.0870192
>tr|Q9VSY8|Q9VSY8_DROME Trafficking protein particle complex subunit OS=Drosophila melanogaster OX=7227 GN=Bet3 PE=1 SV=3	-0.267978		>sp|A1ZAI5|FACR1_DROME Putative fatty acyl-CoA reductase CG5065 OS=Drosophila melanogaster OX=7227 GN=CG5065 PE=3 SV=1	-0.08704
>tr|Q9VSY8|Q9VSY8_DROME Trafficking protein particle complex subunit OS=Drosophila melanogaster OX=7227 GN=Bet3 PE=1 SV=3	-0.267978		>sp|A1ZAI5|FACR1_DROME Putative fatty acyl-CoA reductase CG5065 OS=Drosophila melanogaster OX=7227 GN=CG5065 PE=3 SV=1	-0.08704
>tr|A0A0B4K6V2|A0A0B4K6V2_DROME Like-AP180, isoform G OS=Drosophila melanogaster OX=7227 GN=lap PE=1 SV=1	-0.268202		>sp|A1ZAI5|FACR1_DROME Putative fatty acyl-CoA reductase CG5065 OS=Drosophila melanogaster OX=7227 GN=CG5065 PE=3 SV=1	-0.08704
>tr|Q7JYV3|Q7JYV3_DROME RH58587p OS=Drosophila melanogaster OX=7227 GN=anon-WO0140519.63 PE=2 SV=1	-0.268246		>tr|Q7KIS4|Q7KIS4_DROME N-terminal amidohydrolase 1, isoform C OS=Drosophila melanogaster OX=7227 GN=Ntan1 PE=1 SV=1	-0.0874194
>tr|M9NCT1|M9NCT1_DROME SET and MYND domain containing, arthropod-specific, member 3, isoform C OS=Drosophila melanogaster OX=7227 GN=SmydA-3 PE=4 SV=1	-0.269384		>tr|Q9VXI1|Q9VXI1_DROME Beta hydroxy acid dehydrogenase 1, isoform A OS=Drosophila melanogaster OX=7227 GN=Had1 PE=1 SV=2	-0.087619
>sp|P13060|EF2_DROME Elongation factor 2 OS=Drosophila melanogaster OX=7227 GN=EF2 PE=1 SV=4	-0.270379		>tr|Q9VXI1|Q9VXI1_DROME Beta hydroxy acid dehydrogenase 1, isoform A OS=Drosophila melanogaster OX=7227 GN=Had1 PE=1 SV=2	-0.087619
>sp|P13060|EF2_DROME Elongation factor 2 OS=Drosophila melanogaster OX=7227 GN=EF2 PE=1 SV=4	-0.270379		>tr|Q9VXI1|Q9VXI1_DROME Beta hydroxy acid dehydrogenase 1, isoform A OS=Drosophila melanogaster OX=7227 GN=Had1 PE=1 SV=2	-0.087619
>sp|P13060|EF2_DROME Elongation factor 2 OS=Drosophila melanogaster OX=7227 GN=EF2 PE=1 SV=4	-0.270379		>tr|Q9VD48|Q9VD48_DROME GEO08270p1 OS=Drosophila melanogaster OX=7227 GN=BomBc3 PE=2 SV=1	-0.0877551
>tr|Q8IQV7|Q8IQV7_DROME LP24295p OS=Drosophila melanogaster OX=7227 GN=Dmel\CG6933 PE=2 SV=1	-0.27094		>sp|P25160|ARL1_DROME ADP-ribosylation factor-like protein 1 OS=Drosophila melanogaster OX=7227 GN=Arl1 PE=2 SV=5	-0.0877778
>tr|A0A0B4K7L1|A0A0B4K7L1_DROME ATP-dependent 6-phosphofructokinase OS=Drosophila melanogaster OX=7227 GN=Pfk PE=1 SV=1	-0.271263		>sp|P25160|ARL1_DROME ADP-ribosylation factor-like protein 1 OS=Drosophila melanogaster OX=7227 GN=Arl1 PE=2 SV=5	-0.0877778
>tr|Q95U34|Q95U34_DROME GH11113p OS=Drosophila melanogaster OX=7227 GN=Galk PE=1 SV=1	-0.271837		>tr|Q8I725|Q8I725_DROME Uncharacterized protein OS=Drosophila melanogaster OX=7227 GN=Dmel\CG1236 PE=1 SV=2	-0.0887608
>sp|Q9V9U4|DOHH_DROME Deoxyhypusine hydroxylase OS=Drosophila melanogaster OX=7227 GN=nero PE=2 SV=1	-0.271854		>tr|Q8I725|Q8I725_DROME Uncharacterized protein OS=Drosophila melanogaster OX=7227 GN=Dmel\CG1236 PE=1 SV=2	-0.0887608
>sp|P52486|UBCD4_DROME Ubiquitin-conjugating enzyme E2-22 kDa OS=Drosophila melanogaster OX=7227 GN=Ubc4 PE=1 SV=2	-0.271859		>tr|Q8I725|Q8I725_DROME Uncharacterized protein OS=Drosophila melanogaster OX=7227 GN=Dmel\CG1236 PE=1 SV=2	-0.0887608
>sp|Q9VFS8|PSMD9_DROME 26S proteasome non-ATPase regulatory subunit 9 OS=Drosophila melanogaster OX=7227 GN=CG9588 PE=1 SV=1	-0.272273		>tr|Q95R35|Q95R35_DROME AT09752p OS=Drosophila melanogaster OX=7227 GN=S-Lap4 PE=1 SV=1	-0.0891221
>sp|Q9VFS8|PSMD9_DROME 26S proteasome non-ATPase regulatory subunit 9 OS=Drosophila melanogaster OX=7227 GN=CG9588 PE=1 SV=1	-0.272273		>tr|A1ZB71|A1ZB71_DROME Glutathione S transferase E6 OS=Drosophila melanogaster OX=7227 GN=GstE6 PE=1 SV=1	-0.0900901
>tr|A0A0B4KHF0|A0A0B4KHF0_DROME Ferritin OS=Drosophila melanogaster OX=7227 GN=Fer2LCH PE=1 SV=1	-0.272458		>tr|A1ZB71|A1ZB71_DROME Glutathione S transferase E6 OS=Drosophila melanogaster OX=7227 GN=GstE6 PE=1 SV=1	-0.0900901
>tr|Q9VTU8|Q9VTU8_DROME Carbonic anhydrase 2, isoform A OS=Drosophila melanogaster OX=7227 GN=CAH2 PE=2 SV=1	-0.272836		>tr|Q9VU92|Q9VU92_DROME Uncharacterized protein OS=Drosophila melanogaster OX=7227 GN=FOHSDR PE=3 SV=2	-0.0904762
>sp|Q9W3J5|SYFA_DROME Phenylalanine--tRNA ligase alpha subunit OS=Drosophila melanogaster OX=7227 GN=alpha-PheRS PE=1 SV=1	-0.273494		>tr|Q9V4C7|Q9V4C7_DROME Calcium-transporting ATPase OS=Drosophila melanogaster OX=7227 GN=PMCA PE=1 SV=5	-0.0911277
>sp|Q9W3J5|SYFA_DROME Phenylalanine--tRNA ligase alpha subunit OS=Drosophila melanogaster OX=7227 GN=alpha-PheRS PE=1 SV=1	-0.273494		>tr|Q9V4C7|Q9V4C7_DROME Calcium-transporting ATPase OS=Drosophila melanogaster OX=7227 GN=PMCA PE=1 SV=5	-0.0911277
>sp|Q9W3J5|SYFA_DROME Phenylalanine--tRNA ligase alpha subunit OS=Drosophila melanogaster OX=7227 GN=alpha-PheRS PE=1 SV=1	-0.273494		>tr|Q9V4C7|Q9V4C7_DROME Calcium-transporting ATPase OS=Drosophila melanogaster OX=7227 GN=PMCA PE=1 SV=5	-0.0911277
>tr|Q8I0S9|Q8I0S9_DROME Methylcrotonoyl-CoA carboxylase 1, isoform B OS=Drosophila melanogaster OX=7227 GN=Mccc1 PE=1 SV=1	-0.273502		>sp|Q9VRG7|CNEP1_DROME CTD nuclear envelope phosphatase 1 homolog OS=Drosophila melanogaster OX=7227 GN=Dd PE=2 SV=1	-0.0917695
>sp|P82890|PPAC1_DROME Low molecular weight phosphotyrosine protein phosphatase 1 OS=Drosophila melanogaster OX=7227 GN=primo-1 PE=2 SV=1	-0.273548		>sp|Q9VRG7|CNEP1_DROME CTD nuclear envelope phosphatase 1 homolog OS=Drosophila melanogaster OX=7227 GN=Dd PE=2 SV=1	-0.0917695
>sp|P82890|PPAC1_DROME Low molecular weight phosphotyrosine protein phosphatase 1 OS=Drosophila melanogaster OX=7227 GN=primo-1 PE=2 SV=1	-0.273548		>tr|Q9VDW7|Q9VDW7_DROME Succinate--CoA ligase [ADP/GDP-forming] subunit alpha, mitochondrial OS=Drosophila melanogaster OX=7227 GN=Scsalpha2 PE=2 SV=1	-0.0923977
>sp|Q9V3N1|SP27A_DROME Serine protease inhibitor 27A OS=Drosophila melanogaster OX=7227 GN=Spn27A PE=1 SV=1	-0.273826		>sp|Q9I7S8|PUR6_DROME Multifunctional protein ADE2 OS=Drosophila melanogaster OX=7227 GN=ade5 PE=2 SV=2	-0.093007
>sp|Q9V3N1|SP27A_DROME Serine protease inhibitor 27A OS=Drosophila melanogaster OX=7227 GN=Spn27A PE=1 SV=1	-0.273826		>sp|Q9I7S8|PUR6_DROME Multifunctional protein ADE2 OS=Drosophila melanogaster OX=7227 GN=ade5 PE=2 SV=2	-0.093007
>tr|E1JIS7|E1JIS7_DROME CASK, isoform F OS=Drosophila melanogaster OX=7227 GN=CASK PE=1 SV=1	-0.274454		>sp|Q9I7S8|PUR6_DROME Multifunctional protein ADE2 OS=Drosophila melanogaster OX=7227 GN=ade5 PE=2 SV=2	-0.093007
>tr|Q9VTL0|Q9VTL0_DROME FI19917p1 OS=Drosophila melanogaster OX=7227 GN=Dmel\CG6083 PE=2 SV=2	-0.274845		>tr|Q9VXK7|Q9VXK7_DROME LD31474p OS=Drosophila melanogaster OX=7227 GN=ND-20 PE=2 SV=1	-0.0932127
>tr|A1Z9E3|A1Z9E3_DROME Elongation factor Tu OS=Drosophila melanogaster OX=7227 GN=mEFTu1 PE=1 SV=1	-0.27546		>tr|Q9VXK7|Q9VXK7_DROME LD31474p OS=Drosophila melanogaster OX=7227 GN=ND-20 PE=2 SV=1	-0.0932127
>tr|A1Z9E3|A1Z9E3_DROME Elongation factor Tu OS=Drosophila melanogaster OX=7227 GN=mEFTu1 PE=1 SV=1	-0.27546		>tr|Q9VXK7|Q9VXK7_DROME LD31474p OS=Drosophila melanogaster OX=7227 GN=ND-20 PE=2 SV=1	-0.0932127
>tr|Q9VVA4|Q9VVA4_DROME GH26789p OS=Drosophila melanogaster OX=7227 GN=GS PE=1 SV=2	-0.275922		>tr|Q9VJH8|Q9VJH8_DROME FI03416p OS=Drosophila melanogaster OX=7227 GN=Ugt37D1 PE=1 SV=1	-0.0946593
>tr|Q9VVA4|Q9VVA4_DROME GH26789p OS=Drosophila melanogaster OX=7227 GN=GS PE=1 SV=2	-0.275922		>tr|Q9VTN9|Q9VTN9_DROME FI03238p OS=Drosophila melanogaster OX=7227 GN=Dmel\CG10361 PE=1 SV=2	-0.0954436
>tr|Q9VVA4|Q9VVA4_DROME GH26789p OS=Drosophila melanogaster OX=7227 GN=GS PE=1 SV=2	-0.275922		>tr|Q9VVL5|Q9VVL5_DROME FI11325p OS=Drosophila melanogaster OX=7227 GN=Dmel\CG5567 PE=1 SV=1	-0.0957576
>sp|P31009|RS2_DROME 40S ribosomal protein S2 OS=Drosophila melanogaster OX=7227 GN=RpS2 PE=1 SV=2	-0.27603		>tr|Q0E8T1|Q0E8T1_DROME Uncharacterized protein, isoform B OS=Drosophila melanogaster OX=7227 GN=anon-SAGE:Wang-122 PE=3 SV=1	-0.095858
>sp|P31009|RS2_DROME 40S ribosomal protein S2 OS=Drosophila melanogaster OX=7227 GN=RpS2 PE=1 SV=2	-0.27603		>tr|Q9VDT1|Q9VDT1_DROME Arc42 OS=Drosophila melanogaster OX=7227 GN=Arc42 PE=1 SV=1	-0.0960494
>tr|A1ZB47|A1ZB47_DROME FI12009p OS=Drosophila melanogaster OX=7227 GN=CG5719 PE=2 SV=1	-0.276338		>tr|Q9VDT1|Q9VDT1_DROME Arc42 OS=Drosophila melanogaster OX=7227 GN=Arc42 PE=1 SV=1	-0.0960494
>tr|M9MSF5|M9MSF5_DROME Uncharacterized protein, isoform D OS=Drosophila melanogaster OX=7227 GN=CT17356 PE=4 SV=2	-0.278713		>tr|Q9VDT1|Q9VDT1_DROME Arc42 OS=Drosophila melanogaster OX=7227 GN=Arc42 PE=1 SV=1	-0.0960494
>tr|Q9W3C4|Q9W3C4_DROME Beta-hexosaminidase OS=Drosophila melanogaster OX=7227 GN=Hexo2 PE=1 SV=1	-0.27926		>sp|P41572|6PGD_DROME 6-phosphogluconate dehydrogenase, decarboxylating OS=Drosophila melanogaster OX=7227 GN=Pgd PE=2 SV=1	-0.0960499
>tr|A0A0B4KFI7|A0A0B4KFI7_DROME ATP-dependent 6-phosphofructokinase OS=Drosophila melanogaster OX=7227 GN=Pfk PE=1 SV=1	-0.279501		>sp|P41572|6PGD_DROME 6-phosphogluconate dehydrogenase, decarboxylating OS=Drosophila melanogaster OX=7227 GN=Pgd PE=2 SV=1	-0.0960499
>tr|A0A0B4KFI7|A0A0B4KFI7_DROME ATP-dependent 6-phosphofructokinase OS=Drosophila melanogaster OX=7227 GN=Pfk PE=1 SV=1	-0.279501		>sp|P41572|6PGD_DROME 6-phosphogluconate dehydrogenase, decarboxylating OS=Drosophila melanogaster OX=7227 GN=Pgd PE=2 SV=1	-0.0960499
>sp|Q9W415|WUHO_DROME tRNA (guanine-N(7)-)-methyltransferase non-catalytic subunit wuho OS=Drosophila melanogaster OX=7227 GN=wuho PE=2 SV=1	-0.279717		>tr|Q9VGT3|Q9VGT3_DROME GM04645p OS=Drosophila melanogaster OX=7227 GN=Ugt302C1 PE=1 SV=1	-0.0965909
>tr|Q8T3W8|Q8T3W8_DROME AT27079p OS=Drosophila melanogaster OX=7227 GN=scpr-C PE=2 SV=1	-0.279771		>tr|Q9VGT3|Q9VGT3_DROME GM04645p OS=Drosophila melanogaster OX=7227 GN=Ugt302C1 PE=1 SV=1	-0.0965909
>tr|Q8T3W8|Q8T3W8_DROME AT27079p OS=Drosophila melanogaster OX=7227 GN=scpr-C PE=2 SV=1	-0.279771		>tr|Q9VGT3|Q9VGT3_DROME GM04645p OS=Drosophila melanogaster OX=7227 GN=Ugt302C1 PE=1 SV=1	-0.0965909
>tr|Q8T3W8|Q8T3W8_DROME AT27079p OS=Drosophila melanogaster OX=7227 GN=scpr-C PE=2 SV=1	-0.279771		>sp|Q9VLZ7|C4D21_DROME Probable cytochrome P450 4d21 OS=Drosophila melanogaster OX=7227 GN=Cyp4d21 PE=3 SV=1	-0.0980431
>sp|Q8SY96|NFU1_DROME NFU1 iron-sulfur cluster scaffold homolog, mitochondrial OS=Drosophila melanogaster OX=7227 GN=CG32500 PE=2 SV=1	-0.279859		>sp|Q7YTY6|SP42D_DROME Serine protease inhibitor 42Dd OS=Drosophila melanogaster OX=7227 GN=Spn42Dd PE=2 SV=1	-0.0983871
>tr|Q7K084|Q7K084_DROME Odorant-binding protein 44a, isoform A OS=Drosophila melanogaster OX=7227 GN=Obp44a PE=1 SV=1	-0.28042		>sp|Q7YTY6|SP42D_DROME Serine protease inhibitor 42Dd OS=Drosophila melanogaster OX=7227 GN=Spn42Dd PE=2 SV=1	-0.0983871
>tr|Q7K084|Q7K084_DROME Odorant-binding protein 44a, isoform A OS=Drosophila melanogaster OX=7227 GN=Obp44a PE=1 SV=1	-0.28042		>sp|Q7YTY6|SP42D_DROME Serine protease inhibitor 42Dd OS=Drosophila melanogaster OX=7227 GN=Spn42Dd PE=2 SV=1	-0.0983871
>tr|Q7K084|Q7K084_DROME Odorant-binding protein 44a, isoform A OS=Drosophila melanogaster OX=7227 GN=Obp44a PE=1 SV=1	-0.28042		>sp|P23779|CYTL_DROME Cystatin-like protein OS=Drosophila melanogaster OX=7227 GN=Cys PE=2 SV=2	-0.0984127
>sp|Q7JXF7|SEELE_DROME Protein seele OS=Drosophila melanogaster OX=7227 GN=sel PE=1 SV=1	-0.280952		>sp|P23779|CYTL_DROME Cystatin-like protein OS=Drosophila melanogaster OX=7227 GN=Cys PE=2 SV=2	-0.0984127
>tr|A1Z7P1|A1Z7P1_DROME Phosphoglucomutase 2a OS=Drosophila melanogaster OX=7227 GN=Pgm2a PE=1 SV=1	-0.281701		>sp|P23779|CYTL_DROME Cystatin-like protein OS=Drosophila melanogaster OX=7227 GN=Cys PE=2 SV=2	-0.0984127
>tr|A1Z7P1|A1Z7P1_DROME Phosphoglucomutase 2a OS=Drosophila melanogaster OX=7227 GN=Pgm2a PE=1 SV=1	-0.281701		>tr|Q8IPG9|Q8IPG9_DROME Basigin, isoform A OS=Drosophila melanogaster OX=7227 GN=Bsg PE=1 SV=1	-0.0988679
>tr|A1Z7P1|A1Z7P1_DROME Phosphoglucomutase 2a OS=Drosophila melanogaster OX=7227 GN=Pgm2a PE=1 SV=1	-0.281701		>sp|P48605|TCPG_DROME T-complex protein 1 subunit gamma OS=Drosophila melanogaster OX=7227 GN=CCT3 PE=2 SV=2	-0.0990809
>tr|A1ZBA9|A1ZBA9_DROME Autophagy-related 7, isoform B OS=Drosophila melanogaster OX=7227 GN=Atg7 PE=4 SV=1	-0.283725		>sp|P48605|TCPG_DROME T-complex protein 1 subunit gamma OS=Drosophila melanogaster OX=7227 GN=CCT3 PE=2 SV=2	-0.0990809
>sp|Q94521|DNAT_DROME Dopamine N-acetyltransferase OS=Drosophila melanogaster OX=7227 GN=AANAT1 PE=1 SV=1	-0.284364		>sp|P48605|TCPG_DROME T-complex protein 1 subunit gamma OS=Drosophila melanogaster OX=7227 GN=CCT3 PE=2 SV=2	-0.0990809
>sp|Q94521|DNAT_DROME Dopamine N-acetyltransferase OS=Drosophila melanogaster OX=7227 GN=AANAT1 PE=1 SV=1	-0.284364		>sp|Q9VWH4|IDH3A_DROME Probable isocitrate dehydrogenase [NAD] subunit alpha, mitochondrial OS=Drosophila melanogaster OX=7227 GN=l(1)G0156 PE=2 SV=1	-0.1
>tr|Q8I0S6|Q8I0S6_DROME AT20009p OS=Drosophila melanogaster OX=7227 GN=fbl PE=1 SV=1	-0.284539		>sp|Q9VWH4|IDH3A_DROME Probable isocitrate dehydrogenase [NAD] subunit alpha, mitochondrial OS=Drosophila melanogaster OX=7227 GN=Idh3a PE=2 SV=1	-0.1
>tr|Q8I0S6|Q8I0S6_DROME AT20009p OS=Drosophila melanogaster OX=7227 GN=fbl PE=1 SV=1	-0.284539		>sp|Q9VWH4|IDH3A_DROME Probable isocitrate dehydrogenase [NAD] subunit alpha, mitochondrial OS=Drosophila melanogaster OX=7227 GN=Idh3a PE=2 SV=1	-0.1
>sp|Q94514|COX5A_DROME Cytochrome c oxidase subunit 5A, mitochondrial OS=Drosophila melanogaster OX=7227 GN=COX5A PE=2 SV=2	-0.284564		>sp|P19889|RLA0_DROME 60S acidic ribosomal protein P0 OS=Drosophila melanogaster OX=7227 GN=RpLP0 PE=1 SV=1	-0.100315
>sp|Q94514|COX5A_DROME Cytochrome c oxidase subunit 5A, mitochondrial OS=Drosophila melanogaster OX=7227 GN=COX5A PE=2 SV=2	-0.284564		>sp|P19889|RLA0_DROME 60S acidic ribosomal protein P0 OS=Drosophila melanogaster OX=7227 GN=RpLP0 PE=1 SV=1	-0.100315
>sp|Q94514|COX5A_DROME Cytochrome c oxidase subunit 5A, mitochondrial OS=Drosophila melanogaster OX=7227 GN=COX5A PE=2 SV=2	-0.284564		>sp|P19889|RLA0_DROME 60S acidic ribosomal protein P0 OS=Drosophila melanogaster OX=7227 GN=RpLP0 PE=1 SV=1	-0.100315
>tr|Q9W299|Q9W299_DROME LD03212p OS=Drosophila melanogaster OX=7227 GN=Dmel\CG11474 PE=1 SV=1	-0.28555		>tr|Q7JXZ2|Q7JXZ2_DROME Ecdysone-induced protein 55E, isoform A OS=Drosophila melanogaster OX=7227 GN=Eip55E PE=1 SV=1	-0.100509
>tr|Q9W299|Q9W299_DROME LD03212p OS=Drosophila melanogaster OX=7227 GN=Dmel\CG11474 PE=1 SV=1	-0.28555		>tr|Q7JXZ2|Q7JXZ2_DROME Ecdysone-induced protein 55E, isoform A OS=Drosophila melanogaster OX=7227 GN=Eip55E PE=1 SV=1	-0.100509
>tr|Q7KA66|Q7KA66_DROME Serpin 43Aa OS=Drosophila melanogaster OX=7227 GN=Spn43Aa PE=1 SV=1	-0.285641		>tr|Q7JXZ2|Q7JXZ2_DROME Ecdysone-induced protein 55E, isoform A OS=Drosophila melanogaster OX=7227 GN=Eip55E PE=1 SV=1	-0.100509
>sp|O62621|COPB2_DROME Coatomer subunit beta' OS=Drosophila melanogaster OX=7227 GN=beta'COP PE=2 SV=2	-0.285886		>tr|Q9VC92|Q9VC92_DROME GH15945p OS=Drosophila melanogaster OX=7227 GN=Dmel\CG6432 PE=2 SV=1	-0.101039
>tr|Q5U117|Q5U117_DROME Enigma OS=Drosophila melanogaster OX=7227 GN=Egm PE=1 SV=1	-0.285915		>tr|Q9VC92|Q9VC92_DROME GH15945p OS=Drosophila melanogaster OX=7227 GN=Dmel\CG6432 PE=2 SV=1	-0.101039
>sp|Q9VLS9|LACB2_DROME Beta-lactamase-like protein 2 homolog OS=Drosophila melanogaster OX=7227 GN=CG12375 PE=2 SV=1	-0.286301		>tr|Q9W3H4|Q9W3H4_DROME LD36273p OS=Drosophila melanogaster OX=7227 GN=sni PE=1 SV=1	-0.101619
>tr|A1Z784|A1Z784_DROME Acetyl-CoA carboxylase, isoform A OS=Drosophila melanogaster OX=7227 GN=ACC PE=1 SV=1	-0.286583		>tr|Q9W3H4|Q9W3H4_DROME LD36273p OS=Drosophila melanogaster OX=7227 GN=sni PE=1 SV=1	-0.101619
>tr|A1Z784|A1Z784_DROME Acetyl-CoA carboxylase, isoform A OS=Drosophila melanogaster OX=7227 GN=ACC PE=1 SV=1	-0.286583		>tr|A1ZB68|A1ZB68_DROME FI01423p OS=Drosophila melanogaster OX=7227 GN=GstE3 PE=1 SV=1	-0.101818
>tr|Q9VX63|Q9VX63_DROME FI18001p1 OS=Drosophila melanogaster OX=7227 GN=Dmel\CG8915 PE=2 SV=1	-0.286885		>tr|A1ZB68|A1ZB68_DROME FI01423p OS=Drosophila melanogaster OX=7227 GN=GstE3 PE=1 SV=1	-0.101818
>tr|Q9W457|Q9W457_DROME Serine hydroxymethyltransferase OS=Drosophila melanogaster OX=7227 GN=Shmt PE=1 SV=1	-0.286965		>tr|A1ZB68|A1ZB68_DROME FI01423p OS=Drosophila melanogaster OX=7227 GN=GstE3 PE=1 SV=1	-0.101818
>tr|Q9W457|Q9W457_DROME Serine hydroxymethyltransferase OS=Drosophila melanogaster OX=7227 GN=Shmt PE=1 SV=1	-0.286965		>tr|Q9VKZ7|Q9VKZ7_DROME Nicalin OS=Drosophila melanogaster OX=7227 GN=Q9VKZ7_DROME PE=1 SV=2	-0.102139
>tr|Q9W457|Q9W457_DROME Serine hydroxymethyltransferase OS=Drosophila melanogaster OX=7227 GN=Shmt PE=1 SV=1	-0.286965		>tr|Q9VKZ7|Q9VKZ7_DROME Nicalin OS=Drosophila melanogaster OX=7227 GN=Q9VKZ7_DROME PE=1 SV=2	-0.102139
>tr|Q9VBS7|Q9VBS7_DROME Uncharacterized protein, isoform B OS=Drosophila melanogaster OX=7227 GN=Dmel\CG10550 PE=1 SV=1	-0.287294		>sp|P80455|RS12_DROME 40S ribosomal protein S12 OS=Drosophila melanogaster OX=7227 GN=RpS12 PE=1 SV=2	-0.102878
>tr|Q9VBS7|Q9VBS7_DROME Uncharacterized protein, isoform B OS=Drosophila melanogaster OX=7227 GN=Dmel\CG10550 PE=1 SV=1	-0.287294		>sp|P80455|RS12_DROME 40S ribosomal protein S12 OS=Drosophila melanogaster OX=7227 GN=RpS12 PE=1 SV=2	-0.102878
>tr|Q9VG04|Q9VG04_DROME LP04475p OS=Drosophila melanogaster OX=7227 GN=dMEMO PE=1 SV=1	-0.287797		>sp|P80455|RS12_DROME 40S ribosomal protein S12 OS=Drosophila melanogaster OX=7227 GN=RpS12 PE=1 SV=2	-0.102878
>tr|Q9VG04|Q9VG04_DROME LP04475p OS=Drosophila melanogaster OX=7227 GN=dMEMO PE=1 SV=1	-0.287797		>tr|M9NDY6|M9NDY6_DROME Mushroom-body expressed, isoform I OS=Drosophila melanogaster OX=7227 GN=mub PE=1 SV=1	-0.102968
>tr|A1Z7H7|A1Z7H7_DROME FI19801p1 OS=Drosophila melanogaster OX=7227 GN=Dmel\CG8586 PE=1 SV=1	-0.287838		>tr|Q9W2S8|Q9W2S8_DROME Aminopeptidase OS=Drosophila melanogaster OX=7227 GN=Dmel\CG9806 PE=3 SV=1	-0.103403
>tr|A0A0B4KEX6|A0A0B4KEX6_DROME Jitterbug, isoform M OS=Drosophila melanogaster OX=7227 GN=jbug PE=1 SV=1	-0.288341		>tr|Q9W2S8|Q9W2S8_DROME Aminopeptidase OS=Drosophila melanogaster OX=7227 GN=Dmel\CG9806 PE=3 SV=1	-0.103403
>tr|Q9VSL2|Q9VSL2_DROME Glutathione S transferase O3 OS=Drosophila melanogaster OX=7227 GN=GstO3 PE=1 SV=1	-0.288382		>tr|Q8IPI3|Q8IPI3_DROME Anion exchange protein OS=Drosophila melanogaster OX=7227 GN=Ndae1 PE=1 SV=2	-0.103782
>tr|Q9VSL2|Q9VSL2_DROME Glutathione S transferase O3 OS=Drosophila melanogaster OX=7227 GN=GstO3 PE=1 SV=1	-0.288382		>tr|Q8IPI3|Q8IPI3_DROME Anion exchange protein OS=Drosophila melanogaster OX=7227 GN=Ndae1 PE=1 SV=2	-0.103782
>tr|Q9VSL2|Q9VSL2_DROME Glutathione S transferase O3 OS=Drosophila melanogaster OX=7227 GN=GstO3 PE=1 SV=1	-0.288382		>tr|Q9VMS1|Q9VMS1_DROME Cyclope, isoform A OS=Drosophila melanogaster OX=7227 GN=cype PE=1 SV=3	-0.103896
>tr|Q7K112|Q7K112_DROME LD18435p OS=Drosophila melanogaster OX=7227 GN=twin PE=1 SV=1	-0.288406		>tr|Q9VMS1|Q9VMS1_DROME Cyclope, isoform A OS=Drosophila melanogaster OX=7227 GN=cype PE=1 SV=3	-0.103896
>sp|Q9W092|CHIT2_DROME Probable chitinase 2 OS=Drosophila melanogaster OX=7227 GN=Cht2 PE=1 SV=1	-0.28843		>tr|Q9VMS1|Q9VMS1_DROME Cyclope, isoform A OS=Drosophila melanogaster OX=7227 GN=cype PE=1 SV=3	-0.103896
>sp|Q9W092|CHIT2_DROME Probable chitinase 2 OS=Drosophila melanogaster OX=7227 GN=Cht2 PE=1 SV=1	-0.28843		>tr|Q9VZ38|Q9VZ38_DROME GH02938p OS=Drosophila melanogaster OX=7227 GN=Dmel\CG1537 PE=2 SV=1	-0.105185
>tr|Q9VW90|Q9VW90_DROME Uncharacterized protein OS=Drosophila melanogaster OX=7227 GN=Dmel\CG7298 PE=4 SV=1	-0.289973		>tr|Q7KUC2|Q7KUC2_DROME FI04467p OS=Drosophila melanogaster OX=7227 GN=Pdxk PE=1 SV=1	-0.105592
>tr|Q9VF24|Q9VF24_DROME Crossveinless d OS=Drosophila melanogaster OX=7227 GN=cv-d PE=1 SV=2	-0.290136		>tr|Q7KUC2|Q7KUC2_DROME FI04467p OS=Drosophila melanogaster OX=7227 GN=Pdxk PE=1 SV=1	-0.105592
>tr|M9PC65|M9PC65_DROME Uncharacterized protein, isoform D OS=Drosophila melanogaster OX=7227 GN=Dm_2L:23546 PE=4 SV=1	-0.290169		>tr|Q7KUC2|Q7KUC2_DROME FI04467p OS=Drosophila melanogaster OX=7227 GN=Pdxk PE=1 SV=1	-0.105592
>sp|O76932|PP4C_DROME Serine/threonine-protein phosphatase 4 catalytic subunit OS=Drosophila melanogaster OX=7227 GN=Pp4-19C PE=2 SV=1	-0.290228		>tr|Q9W127|Q9W127_DROME GH17932p OS=Drosophila melanogaster OX=7227 GN=Dmel\CG3663 PE=1 SV=1	-0.105769
>tr|Q9VL46|Q9VL46_DROME Uncharacterized protein, isoform A OS=Drosophila melanogaster OX=7227 GN=Dmel\CG33301 PE=4 SV=3	-0.290663		>sp|Q07093|GCYH_DROME Head-specific guanylate cyclase OS=Drosophila melanogaster OX=7227 GN=Gycalpha99B PE=2 SV=2	-0.105917
>tr|A1Z850|A1Z850_DROME Superoxide dismutase [Cu-Zn] OS=Drosophila melanogaster OX=7227 GN=Ccs PE=1 SV=2	-0.290698		>sp|Q07093|GCYH_DROME Head-specific guanylate cyclase OS=Drosophila melanogaster OX=7227 GN=Gycalpha99B PE=2 SV=2	-0.105917
>tr|A1Z850|A1Z850_DROME Superoxide dismutase [Cu-Zn] OS=Drosophila melanogaster OX=7227 GN=Ccs PE=1 SV=2	-0.290698		>tr|Q86BA5|Q86BA5_DROME LP01981p OS=Drosophila melanogaster OX=7227 GN=p24-2 PE=2 SV=1	-0.106148
>tr|A1Z850|A1Z850_DROME Superoxide dismutase [Cu-Zn] OS=Drosophila melanogaster OX=7227 GN=Ccs PE=1 SV=2	-0.290698		>tr|Q86BA5|Q86BA5_DROME LP01981p OS=Drosophila melanogaster OX=7227 GN=p24-2 PE=2 SV=1	-0.106148
>tr|Q9VBS6|Q9VBS6_DROME Uncharacterized protein, isoform A OS=Drosophila melanogaster OX=7227 GN=Dmel\CG31087 PE=1 SV=2	-0.291607		>tr|Q86BA5|Q86BA5_DROME LP01981p OS=Drosophila melanogaster OX=7227 GN=p24-2 PE=2 SV=1	-0.106148
>tr|Q9VSZ1|Q9VSZ1_DROME GH05942p OS=Drosophila melanogaster OX=7227 GN=DmTOM1 PE=1 SV=2	-0.291713		>tr|Q9VXQ5|Q9VXQ5_DROME Chaperonin containing TCP1 subunit 6 OS=Drosophila melanogaster OX=7227 GN=CCT6 PE=1 SV=1	-0.106379
>tr|Q9VSZ1|Q9VSZ1_DROME GH05942p OS=Drosophila melanogaster OX=7227 GN=DmTOM1 PE=1 SV=2	-0.291713		>tr|Q9VXQ5|Q9VXQ5_DROME Chaperonin containing TCP1 subunit 6 OS=Drosophila melanogaster OX=7227 GN=CCT6 PE=1 SV=1	-0.106379
>tr|Q8IQG9|Q8IQG9_DROME Adenylate kinase 1, isoform B OS=Drosophila melanogaster OX=7227 GN=Adk1 PE=1 SV=1	-0.29214		>tr|Q9VXQ5|Q9VXQ5_DROME Chaperonin containing TCP1 subunit 6 OS=Drosophila melanogaster OX=7227 GN=CCT6 PE=1 SV=1	-0.106379
>tr|Q8IQG9|Q8IQG9_DROME Adenylate kinase 1, isoform B OS=Drosophila melanogaster OX=7227 GN=Adk1 PE=1 SV=1	-0.29214		>tr|Q8SY58|Q8SY58_DROME GH02315p OS=Drosophila melanogaster OX=7227 GN=Dmel\CG4872 PE=1 SV=1	-0.106479
>tr|Q8IQG9|Q8IQG9_DROME Adenylate kinase 1, isoform B OS=Drosophila melanogaster OX=7227 GN=Adk1 PE=1 SV=1	-0.29214		>sp|Q27580|SAHH_DROME Adenosylhomocysteinase OS=Drosophila melanogaster OX=7227 GN=Ahcy PE=1 SV=2	-0.107176
>tr|Q9VLW1|Q9VLW1_DROME Lectin type C OS=Drosophila melanogaster OX=7227 GN=lectin-28C PE=1 SV=2	-0.292453		>sp|Q27580|SAHH_DROME Adenosylhomocysteinase OS=Drosophila melanogaster OX=7227 GN=Ahcy PE=1 SV=2	-0.107176
>tr|Q9VLW1|Q9VLW1_DROME Lectin type C OS=Drosophila melanogaster OX=7227 GN=lectin-28C PE=1 SV=2	-0.292453		>sp|Q27580|SAHH_DROME Adenosylhomocysteinase OS=Drosophila melanogaster OX=7227 GN=Ahcy PE=1 SV=2	-0.107176
>tr|Q9VDM7|Q9VDM7_DROME Uncharacterized protein OS=Drosophila melanogaster OX=7227 GN=Dmel\CG4335 PE=4 SV=1	-0.294505		>sp|Q94511|NDUS1_DROME NADH-ubiquinone oxidoreductase 75 kDa subunit, mitochondrial OS=Drosophila melanogaster OX=7227 GN=ND-75 PE=2 SV=3	-0.10725
>tr|Q9VDM7|Q9VDM7_DROME Uncharacterized protein OS=Drosophila melanogaster OX=7227 GN=Dmel\CG4335 PE=4 SV=1	-0.294505		>sp|Q94511|NDUS1_DROME NADH-ubiquinone oxidoreductase 75 kDa subunit, mitochondrial OS=Drosophila melanogaster OX=7227 GN=ND-75 PE=2 SV=3	-0.10725
>tr|Q9VUJ1|Q9VUJ1_DROME Proteasome subunit beta OS=Drosophila melanogaster OX=7227 GN=Prosbeta2 PE=1 SV=1	-0.295956		>sp|Q94511|NDUS1_DROME NADH-ubiquinone oxidoreductase 75 kDa subunit, mitochondrial OS=Drosophila melanogaster OX=7227 GN=ND-75 PE=2 SV=3	-0.10725
>tr|A0A0B4KFT5|A0A0B4KFT5_DROME Glutathione S transferase S1, isoform D OS=Drosophila melanogaster OX=7227 GN=GstS1 PE=1 SV=1	-0.296		>tr|Q7KN85|Q7KN85_DROME ATP-citrate synthase OS=Drosophila melanogaster OX=7227 GN=ATPCL PE=1 SV=1	-0.107644
>tr|A0A0B4KFT5|A0A0B4KFT5_DROME Glutathione S transferase S1, isoform D OS=Drosophila melanogaster OX=7227 GN=GstS1 PE=1 SV=1	-0.296		>tr|Q7KN85|Q7KN85_DROME ATP-citrate synthase OS=Drosophila melanogaster OX=7227 GN=ATPCL PE=1 SV=1	-0.107644
>tr|Q9VMD3|Q9VMD3_DROME HemK methyltransferase 1, isoform A OS=Drosophila melanogaster OX=7227 GN=HemK1 PE=1 SV=1	-0.296594		>tr|Q7KN85|Q7KN85_DROME ATP-citrate synthase OS=Drosophila melanogaster OX=7227 GN=ATPCL PE=1 SV=1	-0.107644
>tr|Q9VMD3|Q9VMD3_DROME HemK methyltransferase 1, isoform A OS=Drosophila melanogaster OX=7227 GN=HemK1 PE=1 SV=1	-0.296594		>tr|Q8IPN4|Q8IPN4_DROME Krotzkopf verkehrt, isoform A OS=Drosophila melanogaster OX=7227 GN=kkv PE=4 SV=1	-0.107864
>sp|Q03042|KGP1_DROME cGMP-dependent protein kinase, isozyme 1 OS=Drosophila melanogaster OX=7227 GN=Pkg21D PE=1 SV=2	-0.296745		>tr|P91632|P91632_DROME Mushroom-body expressed, isoform A OS=Drosophila melanogaster OX=7227 GN=mub PE=1 SV=1	-0.108549
>sp|P54399|PDI_DROME Protein disulfide-isomerase OS=Drosophila melanogaster OX=7227 GN=Pdi PE=2 SV=1	-0.297984		>tr|P91632|P91632_DROME Mushroom-body expressed, isoform A OS=Drosophila melanogaster OX=7227 GN=mub PE=1 SV=1	-0.108549
>sp|P54399|PDI_DROME Protein disulfide-isomerase OS=Drosophila melanogaster OX=7227 GN=Pdi PE=2 SV=1	-0.297984		>tr|Q7K2S9|Q7K2S9_DROME AT30376p OS=Drosophila melanogaster OX=7227 GN=loopin-1 PE=1 SV=1	-0.108555
>sp|P54399|PDI_DROME Protein disulfide-isomerase OS=Drosophila melanogaster OX=7227 GN=Pdi PE=2 SV=1	-0.297984		>tr|Q7K2S9|Q7K2S9_DROME AT30376p OS=Drosophila melanogaster OX=7227 GN=loopin-1 PE=1 SV=1	-0.108555
>sp|Q9VH48|CARM1_DROME Probable histone-arginine methyltransferase CARMER OS=Drosophila melanogaster OX=7227 GN=Art4 PE=1 SV=1	-0.299057		>tr|Q7K2S9|Q7K2S9_DROME AT30376p OS=Drosophila melanogaster OX=7227 GN=loopin-1 PE=1 SV=1	-0.108555
>sp|Q9VH48|CARM1_DROME Probable histone-arginine methyltransferase CARMER OS=Drosophila melanogaster OX=7227 GN=Art4 PE=1 SV=1	-0.299057		>tr|Q9VQM2|Q9VQM2_DROME NADH dehydrogenase [ubiquinone] 1 subunit C2 OS=Drosophila melanogaster OX=7227 GN=ND-B14.5B PE=1 SV=1	-0.108621
>tr|O18333|O18333_DROME GH01619p OS=Drosophila melanogaster OX=7227 GN=Rab2 PE=1 SV=1	-0.299531		>tr|Q9VQM2|Q9VQM2_DROME NADH dehydrogenase [ubiquinone] 1 subunit C2 OS=Drosophila melanogaster OX=7227 GN=ND-B14.5B PE=1 SV=1	-0.108621
>tr|O18333|O18333_DROME GH01619p OS=Drosophila melanogaster OX=7227 GN=Rab2 PE=1 SV=1	-0.299531		>tr|Q9VQM2|Q9VQM2_DROME NADH dehydrogenase [ubiquinone] 1 subunit C2 OS=Drosophila melanogaster OX=7227 GN=ND-B14.5B PE=1 SV=1	-0.108621
>tr|Q9W0J9|Q9W0J9_DROME GH07301p OS=Drosophila melanogaster OX=7227 GN=CT9987 PE=1 SV=1	-0.3		>tr|Q9VXH7|Q9VXH7_DROME FI17510p1 OS=Drosophila melanogaster OX=7227 GN=Dmel\CG9917 PE=1 SV=1	-0.108638
>tr|Q9W0J9|Q9W0J9_DROME GH07301p OS=Drosophila melanogaster OX=7227 GN=CT9987 PE=1 SV=1	-0.3		>tr|Q9VXH7|Q9VXH7_DROME FI17510p1 OS=Drosophila melanogaster OX=7227 GN=Dmel\CG9917 PE=1 SV=1	-0.108638
>sp|P05303|EF1A2_DROME Elongation factor 1-alpha 2 OS=Drosophila melanogaster OX=7227 GN=eEF1alpha2 PE=2 SV=2	-0.300216		>tr|Q9V3I0|Q9V3I0_DROME EG:BACR42I17.2 protein OS=Drosophila melanogaster OX=7227 GN=EG:BACR42I17.2 PE=2 SV=1	-0.108654
>sp|P05303|EF1A2_DROME Elongation factor 1-alpha 2 OS=Drosophila melanogaster OX=7227 GN=eEF1alpha2 PE=2 SV=2	-0.300216		>tr|Q9VHN7|Q9VHN7_DROME LP07963p OS=Drosophila melanogaster OX=7227 GN=anon-WO0118547.344 PE=1 SV=3	-0.108786
>sp|P05303|EF1A2_DROME Elongation factor 1-alpha 2 OS=Drosophila melanogaster OX=7227 GN=eEF1alpha2 PE=2 SV=2	-0.300216		>tr|Q9VHN7|Q9VHN7_DROME LP07963p OS=Drosophila melanogaster OX=7227 GN=anon-WO0118547.344 PE=1 SV=3	-0.108786
>tr|Q9VR51|Q9VR51_DROME RE68036p OS=Drosophila melanogaster OX=7227 GN=Dmel\CG14615 PE=1 SV=1	-0.300658		>tr|Q9VHN7|Q9VHN7_DROME LP07963p OS=Drosophila melanogaster OX=7227 GN=anon-WO0118547.344 PE=1 SV=3	-0.108786
>tr|Q9VR51|Q9VR51_DROME RE68036p OS=Drosophila melanogaster OX=7227 GN=Dmel\CG14615 PE=1 SV=1	-0.300658		>tr|O96692|O96692_DROME RE63021p OS=Drosophila melanogaster OX=7227 GN=Rap2l PE=1 SV=1	-0.108791
>tr|Q8IN25|Q8IN25_DROME Aminopeptidase OS=Drosophila melanogaster OX=7227 GN=Dmel\CG31198 PE=1 SV=1	-0.300745		>tr|O96692|O96692_DROME RE63021p OS=Drosophila melanogaster OX=7227 GN=Rap2l PE=1 SV=1	-0.108791
>tr|E1JJ78|E1JJ78_DROME Like-AP180, isoform D OS=Drosophila melanogaster OX=7227 GN=lap PE=1 SV=1	-0.301015		>tr|Q9VCV4|Q9VCV4_DROME Iron regulatory protein 1A OS=Drosophila melanogaster OX=7227 GN=Irp-1A PE=1 SV=1	-0.108869
>tr|Q9VRP3|Q9VRP3_DROME AT08565p OS=Drosophila melanogaster OX=7227 GN=Txl PE=1 SV=1	-0.301045		>tr|Q9VCV4|Q9VCV4_DROME Iron regulatory protein 1A OS=Drosophila melanogaster OX=7227 GN=Irp-1A PE=1 SV=1	-0.108869
>tr|Q7KUB1|Q7KUB1_DROME Isocitrate dehydrogenase [NADP] OS=Drosophila melanogaster OX=7227 GN=Idh PE=1 SV=1	-0.301279		>tr|Q9VCV4|Q9VCV4_DROME Iron regulatory protein 1A OS=Drosophila melanogaster OX=7227 GN=Irp-1A PE=1 SV=1	-0.108869
>tr|Q7KUB1|Q7KUB1_DROME Isocitrate dehydrogenase [NADP] OS=Drosophila melanogaster OX=7227 GN=Idh PE=1 SV=1	-0.301279		>tr|Q9VB96|Q9VB96_DROME Uncharacterized protein, isoform A OS=Drosophila melanogaster OX=7227 GN=Dmel\CG31075 PE=1 SV=2	-0.109897
>tr|Q7KUB1|Q7KUB1_DROME Isocitrate dehydrogenase [NADP] OS=Drosophila melanogaster OX=7227 GN=Idh PE=1 SV=1	-0.301279		>tr|Q9VB96|Q9VB96_DROME Uncharacterized protein, isoform A OS=Drosophila melanogaster OX=7227 GN=Dmel\CG31075 PE=1 SV=2	-0.109897
>sp|Q09332|UGGG_DROME UDP-glucose:glycoprotein glucosyltransferase OS=Drosophila melanogaster OX=7227 GN=Uggt PE=1 SV=2	-0.301615		>tr|Q9VB96|Q9VB96_DROME Uncharacterized protein, isoform A OS=Drosophila melanogaster OX=7227 GN=Dmel\CG31075 PE=1 SV=2	-0.109897
>sp|Q09332|UGGG_DROME UDP-glucose:glycoprotein glucosyltransferase OS=Drosophila melanogaster OX=7227 GN=Uggt PE=1 SV=2	-0.301615		>tr|Q7K3V6|Q7K3V6_DROME AT01345p OS=Drosophila melanogaster OX=7227 GN=mEFTu2 PE=1 SV=1	-0.110307
>sp|Q09332|UGGG_DROME UDP-glucose:glycoprotein glucosyltransferase OS=Drosophila melanogaster OX=7227 GN=Uggt PE=1 SV=2	-0.301615		>sp|Q9VHS2|COX7A_DROME Cytochrome c oxidase subunit 7A, mitochondrial OS=Drosophila melanogaster OX=7227 GN=COX7A PE=3 SV=1	-0.111236
>tr|Q8IQB7|Q8IQB7_DROME MIP21654p OS=Drosophila melanogaster OX=7227 GN=BcDNA:RH42907 PE=1 SV=1	-0.301748		>sp|Q9VHS2|COX7A_DROME Cytochrome c oxidase subunit 7A, mitochondrial OS=Drosophila melanogaster OX=7227 GN=COX7A PE=3 SV=1	-0.111236
>tr|Q8IQB7|Q8IQB7_DROME MIP21654p OS=Drosophila melanogaster OX=7227 GN=BcDNA:RH42907 PE=1 SV=1	-0.301748		>sp|Q9VHS2|COX7A_DROME Cytochrome c oxidase subunit 7A, mitochondrial OS=Drosophila melanogaster OX=7227 GN=COX7A PE=3 SV=1	-0.111236
>tr|Q8IQB7|Q8IQB7_DROME MIP21654p OS=Drosophila melanogaster OX=7227 GN=BcDNA:RH42907 PE=1 SV=1	-0.301748		>tr|Q9VRD6|Q9VRD6_DROME GEO05124p1 OS=Drosophila melanogaster OX=7227 GN=Ntf-2 PE=1 SV=1	-0.111538
>sp|Q9VF26|SPNE_DROME Probable ATP-dependent RNA helicase spindle-E OS=Drosophila melanogaster OX=7227 GN=spn-E PE=2 SV=1	-0.302162		>tr|Q9VRD6|Q9VRD6_DROME GEO05124p1 OS=Drosophila melanogaster OX=7227 GN=Ntf-2 PE=1 SV=1	-0.111538
>tr|H8F4T3|H8F4T3_DROME MIP34848p1 OS=Drosophila melanogaster OX=7227 GN=smp-30 PE=1 SV=1	-0.302288		>tr|Q9VRD6|Q9VRD6_DROME GEO05124p1 OS=Drosophila melanogaster OX=7227 GN=Ntf-2 PE=1 SV=1	-0.111538
>tr|H8F4T3|H8F4T3_DROME MIP34848p1 OS=Drosophila melanogaster OX=7227 GN=smp-30 PE=1 SV=1	-0.302288		>tr|Q9VEE9|Q9VEE9_DROME ALG1, chitobiosyldiphosphodolichol beta-mannosyltransferase OS=Drosophila melanogaster OX=7227 GN=Alg1 PE=1 SV=1	-0.111883
>sp|P40946|ARF6_DROME ADP-ribosylation factor 6 OS=Drosophila melanogaster OX=7227 GN=Arf51F PE=1 SV=3	-0.302857		>tr|Q9V3Q4|Q9V3Q4_DROME GH25379p OS=Drosophila melanogaster OX=7227 GN=Jafrac2 PE=1 SV=1	-0.112397
>sp|P41042|RS4_DROME 40S ribosomal protein S4 OS=Drosophila melanogaster OX=7227 GN=RpS4 PE=1 SV=2	-0.303065		>tr|Q9V3Q4|Q9V3Q4_DROME Peroxiredoxin OS=Drosophila melanogaster OX=7227 GN=Jafrac2 PE=1 SV=1	-0.112397
>sp|P41042|RS4_DROME 40S ribosomal protein S4 OS=Drosophila melanogaster OX=7227 GN=RpS4 PE=1 SV=2	-0.303065		>tr|Q9VMH2|Q9VMH2_DROME Actin-related protein 2/3 complex subunit 4 OS=Drosophila melanogaster OX=7227 GN=Arpc4 PE=1 SV=1	-0.1125
>tr|Q7JX87|Q7JX87_DROME Peroxiredoxin 2540-2 OS=Drosophila melanogaster OX=7227 GN=Prx2540-2 PE=1 SV=1	-0.303182		>sp|Q8SXY6|TMEDA_DROME Transmembrane emp24 domain-containing protein bai OS=Drosophila melanogaster OX=7227 GN=bai PE=2 SV=1	-0.112621
>tr|Q7JX87|Q7JX87_DROME Peroxiredoxin 2540-2 OS=Drosophila melanogaster OX=7227 GN=Prx2540-2 PE=1 SV=1	-0.303182		>tr|Q0KIE7|Q0KIE7_DROME Ankyrin, isoform B OS=Drosophila melanogaster OX=7227 GN=Ank PE=1 SV=1	-0.113041
>tr|Q7JX87|Q7JX87_DROME Peroxiredoxin 2540-2 OS=Drosophila melanogaster OX=7227 GN=Prx2540-2 PE=1 SV=1	-0.303182		>tr|Q0KIE7|Q0KIE7_DROME Ankyrin, isoform B OS=Drosophila melanogaster OX=7227 GN=Ank PE=1 SV=1	-0.113041
>tr|A1Z893|A1Z893_DROME DI01187p OS=Drosophila melanogaster OX=7227 GN=Dmel\CG12896 PE=2 SV=1	-0.303182		>tr|Q0KIE7|Q0KIE7_DROME Ankyrin, isoform B OS=Drosophila melanogaster OX=7227 GN=Ank PE=1 SV=1	-0.113041
>sp|Q9V3Z2|SER7_DROME Serine protease 7 OS=Drosophila melanogaster OX=7227 GN=Sp7 PE=1 SV=1	-0.303325		>tr|A1Z6G4|A1Z6G4_DROME RE41154p1 OS=Drosophila melanogaster OX=7227 GN=Dmel\CG17508 PE=1 SV=1	-0.113396
>sp|Q9V3Z2|SER7_DROME Serine protease 7 OS=Drosophila melanogaster OX=7227 GN=Sp7 PE=1 SV=1	-0.303325		>tr|A1Z6G4|A1Z6G4_DROME RE41154p1 OS=Drosophila melanogaster OX=7227 GN=Dmel\CG17508 PE=1 SV=1	-0.113396
>tr|Q9VP02|Q9VP02_DROME Aldose 1-epimerase OS=Drosophila melanogaster OX=7227 GN=CG12562 PE=1 SV=3	-0.303514		>tr|Q9VM14|Q9VM14_DROME AT21758p OS=Drosophila melanogaster OX=7227 GN=muc PE=1 SV=1	-0.114258
>tr|Q9VP02|Q9VP02_DROME Aldose 1-epimerase OS=Drosophila melanogaster OX=7227 GN=CG12562 PE=1 SV=3	-0.303514		>tr|Q9VM14|Q9VM14_DROME AT21758p OS=Drosophila melanogaster OX=7227 GN=muc PE=1 SV=1	-0.114258
>tr|Q9VP02|Q9VP02_DROME Aldose 1-epimerase OS=Drosophila melanogaster OX=7227 GN=CG12562 PE=1 SV=3	-0.303514		>tr|Q9VM14|Q9VM14_DROME AT21758p OS=Drosophila melanogaster OX=7227 GN=muc PE=1 SV=1	-0.114258
>sp|Q9V7D2|VATD1_DROME V-type proton ATPase subunit D 1 OS=Drosophila melanogaster OX=7227 GN=Vha36-1 PE=2 SV=1	-0.303659		>sp|O02649|CH60A_DROME Heat shock protein 60A OS=Drosophila melanogaster OX=7227 GN=Hsp60A PE=1 SV=3	-0.115183
>sp|Q9V7D2|VATD1_DROME V-type proton ATPase subunit D 1 OS=Drosophila melanogaster OX=7227 GN=Vha36-1 PE=2 SV=1	-0.303659		>sp|O02649|CH60A_DROME Heat shock protein 60A OS=Drosophila melanogaster OX=7227 GN=Hsp60A PE=1 SV=3	-0.115183
>tr|A0A0B4LID7|A0A0B4LID7_DROME Uncharacterized protein, isoform C OS=Drosophila melanogaster OX=7227 GN=ClpX PE=1 SV=1	-0.303829		>sp|O02649|CH60A_DROME Heat shock protein 60A OS=Drosophila melanogaster OX=7227 GN=Hsp60A PE=1 SV=3	-0.115183
>sp|Q9VCI0|ORN_DROME Probable oligoribonuclease OS=Drosophila melanogaster OX=7227 GN=CG10214 PE=2 SV=1	-0.304739		>tr|Q9VBP6|Q9VBP6_DROME Succinate-semialdehyde dehydrogenase OS=Drosophila melanogaster OX=7227 GN=Ssadh PE=1 SV=1	-0.115324
>sp|P40417|ERKA_DROME Mitogen-activated protein kinase ERK-A OS=Drosophila melanogaster OX=7227 GN=rl PE=1 SV=3	-0.305851		>tr|Q9VBP6|Q9VBP6_DROME Succinate-semialdehyde dehydrogenase OS=Drosophila melanogaster OX=7227 GN=Ssadh PE=1 SV=1	-0.115324
>sp|P40417|ERKA_DROME Mitogen-activated protein kinase ERK-A OS=Drosophila melanogaster OX=7227 GN=rl PE=1 SV=3	-0.305851		>tr|Q9VBP6|Q9VBP6_DROME Succinate-semialdehyde dehydrogenase OS=Drosophila melanogaster OX=7227 GN=Ssadh PE=1 SV=1	-0.115324
>sp|P40417|ERKA_DROME Mitogen-activated protein kinase ERK-A OS=Drosophila melanogaster OX=7227 GN=rl PE=1 SV=3	-0.305851		>tr|Q7KVX5|Q7KVX5_DROME VAMP-associated protein 33kDa, isoform A OS=Drosophila melanogaster OX=7227 GN=Vap33 PE=1 SV=1	-0.115745
>tr|M9PF25|M9PF25_DROME Boule, isoform F OS=Drosophila melanogaster OX=7227 GN=bol PE=1 SV=1	-0.306438		>tr|Q7KVX5|Q7KVX5_DROME VAMP-associated protein 33kDa, isoform A OS=Drosophila melanogaster OX=7227 GN=Vap33 PE=1 SV=1	-0.115745
>sp|Q9VG98|GSTD2_DROME Glutathione S-transferase D2 OS=Drosophila melanogaster OX=7227 GN=GstD2 PE=1 SV=1	-0.306512		>tr|Q7KVX5|Q7KVX5_DROME VAMP-associated protein 33kDa, isoform A OS=Drosophila melanogaster OX=7227 GN=Vap33 PE=1 SV=1	-0.115745
>sp|Q9W303|IDGF4_DROME Chitinase-like protein Idgf4 OS=Drosophila melanogaster OX=7227 GN=Idgf4 PE=2 SV=1	-0.306561		>tr|E2QCF1|E2QCF1_DROME ATP-citrate synthase OS=Drosophila melanogaster OX=7227 GN=ATPCL PE=1 SV=1	-0.115982
>sp|Q9W303|IDGF4_DROME Chitinase-like protein Idgf4 OS=Drosophila melanogaster OX=7227 GN=Idgf4 PE=2 SV=1	-0.306561		>tr|E2QCF1|E2QCF1_DROME ATP-citrate synthase OS=Drosophila melanogaster OX=7227 GN=ATPCL PE=1 SV=1	-0.115982
>sp|Q9W303|IDGF4_DROME Chitinase-like protein Idgf4 OS=Drosophila melanogaster OX=7227 GN=Idgf4 PE=2 SV=1	-0.306561		>sp|Q9V9A7|MCCB_DROME Probable methylcrotonoyl-CoA carboxylase beta chain, mitochondrial OS=Drosophila melanogaster OX=7227 GN=l(2)04524 PE=2 SV=1	-0.11609
>tr|Q9VG42|Q9VG42_DROME Glycine N-methyltransferase OS=Drosophila melanogaster OX=7227 GN=Gnmt PE=1 SV=1	-0.306574		>sp|Q9V9A7|MCCB_DROME Probable methylcrotonoyl-CoA carboxylase beta chain, mitochondrial OS=Drosophila melanogaster OX=7227 GN=Mccc2 PE=2 SV=1	-0.11609
>tr|A1Z7K8|A1Z7K8_DROME AaRS-interacting multifunctional protein 1 OS=Drosophila melanogaster OX=7227 GN=AIMP1 PE=1 SV=1	-0.306811		>tr|Q9VKR4|Q9VKR4_DROME Aminomethyltransferase OS=Drosophila melanogaster OX=7227 GN=Dmel\CG6415 PE=1 SV=1	-0.116296
>sp|P08985|H2AV_DROME Histone H2A.v OS=Drosophila melanogaster OX=7227 GN=His2Av PE=1 SV=2	-0.307801		>tr|Q9VKR4|Q9VKR4_DROME Aminomethyltransferase OS=Drosophila melanogaster OX=7227 GN=Dmel\CG6415 PE=1 SV=1	-0.116296
>sp|P08985|H2AV_DROME Histone H2A.v OS=Drosophila melanogaster OX=7227 GN=His2Av PE=1 SV=2	-0.307801		>sp|P61851|SODC_DROME Superoxide dismutase [Cu-Zn] OS=Drosophila melanogaster OX=7227 GN=Sod1 PE=1 SV=2	-0.11634
>sp|P08985|H2AV_DROME Histone H2A.v OS=Drosophila melanogaster OX=7227 GN=His2Av PE=1 SV=2	-0.307801		>sp|P61851|SODC_DROME Superoxide dismutase [Cu-Zn] OS=Drosophila melanogaster OX=7227 GN=Sod1 PE=1 SV=2	-0.11634
>tr|Q9VGV9|Q9VGV9_DROME GH11067p OS=Drosophila melanogaster OX=7227 GN=Dmel\CG6567 PE=1 SV=1	-0.308085		>tr|Q9VQL6|Q9VQL6_DROME Fatty acid synthase 2, isoform A OS=Drosophila melanogaster OX=7227 GN=FASN2 PE=1 SV=1	-0.116397
>tr|Q8SXC2|Q8SXC2_DROME FI04487p OS=Drosophila melanogaster OX=7227 GN=Kyat PE=1 SV=1	-0.308222		>tr|Q9VQL6|Q9VQL6_DROME Fatty acid synthase 2, isoform A OS=Drosophila melanogaster OX=7227 GN=FASN2 PE=1 SV=1	-0.116397
>tr|Q8SXC2|Q8SXC2_DROME FI04487p OS=Drosophila melanogaster OX=7227 GN=Kyat PE=1 SV=1	-0.308222		>tr|Q9VQL6|Q9VQL6_DROME Fatty acid synthase 2, isoform A OS=Drosophila melanogaster OX=7227 GN=FASN2 PE=1 SV=1	-0.116397
>tr|Q8SXC2|Q8SXC2_DROME FI04487p OS=Drosophila melanogaster OX=7227 GN=Kyat PE=1 SV=1	-0.308222		>tr|Q8MKK1|Q8MKK1_DROME AaRS-interacting multifunctional protein 3 OS=Drosophila melanogaster OX=7227 GN=AIMP3 PE=1 SV=1	-0.117318
>tr|Q9W3C3|Q9W3C3_DROME LD10016p OS=Drosophila melanogaster OX=7227 GN=Dmel\CG2004 PE=1 SV=1	-0.308235		>sp|A1Z6H7|PO210_DROME Nuclear pore membrane glycoprotein 210 OS=Drosophila melanogaster OX=7227 GN=Gp210 PE=1 SV=1	-0.117644
>tr|Q9W3C3|Q9W3C3_DROME LD10016p OS=Drosophila melanogaster OX=7227 GN=Dmel\CG2004 PE=1 SV=1	-0.308235		>sp|A1Z6H7|PO210_DROME Nuclear pore membrane glycoprotein 210 OS=Drosophila melanogaster OX=7227 GN=Gp210 PE=1 SV=1	-0.117644
>sp|O97477|INO1_DROME Inositol-3-phosphate synthase OS=Drosophila melanogaster OX=7227 GN=Inos PE=1 SV=1	-0.308319		>sp|A1Z6H7|PO210_DROME Nuclear pore membrane glycoprotein 210 OS=Drosophila melanogaster OX=7227 GN=Gp210 PE=1 SV=1	-0.117644
>sp|O97477|INO1_DROME Inositol-3-phosphate synthase OS=Drosophila melanogaster OX=7227 GN=Inos PE=1 SV=1	-0.308319		>sp|Q9VPS5|CH60B_DROME 60 kDa heat shock protein homolog 1, mitochondrial OS=Drosophila melanogaster OX=7227 GN=Hsp60B PE=2 SV=1	-0.118056
>sp|O97477|INO1_DROME Inositol-3-phosphate synthase OS=Drosophila melanogaster OX=7227 GN=Inos PE=1 SV=1	-0.308319		>sp|Q9VPS5|CH60B_DROME 60 kDa heat shock protein homolog 1, mitochondrial OS=Drosophila melanogaster OX=7227 GN=Hsp60B PE=2 SV=1	-0.118056
>sp|P08645|RAP1_DROME Ras-related protein Rap1 OS=Drosophila melanogaster OX=7227 GN=Rap1 PE=2 SV=2	-0.308696		>sp|Q9VPS5|CH60B_DROME 60 kDa heat shock protein homolog 1, mitochondrial OS=Drosophila melanogaster OX=7227 GN=Hsp60B PE=2 SV=1	-0.118056
>tr|Q9VIU8|Q9VIU8_DROME GH25853p OS=Drosophila melanogaster OX=7227 GN=Dmel\CG10132 PE=1 SV=2	-0.309037		>tr|Q9VNW6|Q9VNW6_DROME Delta-1-pyrroline-5-carboxylate synthase OS=Drosophila melanogaster OX=7227 GN=Dmel\CG7470 PE=1 SV=1	-0.118299
>sp|Q9V3D4|IDGF2_DROME Chitinase-like protein Idgf2 OS=Drosophila melanogaster OX=7227 GN=Idgf2 PE=1 SV=1	-0.309091		>tr|Q9VNW6|Q9VNW6_DROME Delta-1-pyrroline-5-carboxylate synthase OS=Drosophila melanogaster OX=7227 GN=Dmel\CG7470 PE=1 SV=1	-0.118299
>tr|O18332|O18332_DROME FI01544p OS=Drosophila melanogaster OX=7227 GN=Rab1 PE=1 SV=1	-0.309268		>tr|Q9VNW6|Q9VNW6_DROME Delta-1-pyrroline-5-carboxylate synthase OS=Drosophila melanogaster OX=7227 GN=Dmel\CG7470 PE=1 SV=1	-0.118299
>tr|O18332|O18332_DROME FI01544p OS=Drosophila melanogaster OX=7227 GN=Rab1 PE=1 SV=1	-0.309268		>sp|Q9W351|AAAS_DROME Aladin OS=Drosophila melanogaster OX=7227 GN=Aladin PE=2 SV=1	-0.11867
>tr|Q9VUK8|Q9VUK8_DROME FI18749p1 OS=Drosophila melanogaster OX=7227 GN=GlyRS PE=1 SV=1	-0.309804		>sp|Q9W351|AAAS_DROME Aladin OS=Drosophila melanogaster OX=7227 GN=Aladin PE=2 SV=1	-0.11867
>tr|Q9VUK8|Q9VUK8_DROME FI18749p1 OS=Drosophila melanogaster OX=7227 GN=GlyRS PE=1 SV=1	-0.309804		>tr|Q9VRG8|Q9VRG8_DROME GH01474p OS=Drosophila melanogaster OX=7227 GN=Dmel\CG1486 PE=1 SV=1	-0.118779
>tr|Q9VUK8|Q9VUK8_DROME FI18749p1 OS=Drosophila melanogaster OX=7227 GN=GlyRS PE=1 SV=1	-0.309804		>tr|Q9VRG8|Q9VRG8_DROME GH01474p OS=Drosophila melanogaster OX=7227 GN=Dmel\CG1486 PE=1 SV=1	-0.118779
>tr|A0A0B4JCT2|A0A0B4JCT2_DROME Uncharacterized protein, isoform B OS=Drosophila melanogaster OX=7227 GN=Dmel\CG17575 PE=4 SV=1	-0.310403		>tr|Q9VRG8|Q9VRG8_DROME GH01474p OS=Drosophila melanogaster OX=7227 GN=Dmel\CG1486 PE=1 SV=1	-0.118779
>tr|A0A0B4KHG5|A0A0B4KHG5_DROME Chaoptin, isoform C OS=Drosophila melanogaster OX=7227 GN=chp PE=1 SV=1	-0.310498		>tr|Q967S0|Q967S0_DROME Amidophosphoribosyltransferase OS=Drosophila melanogaster OX=7227 GN=Prat2 PE=2 SV=1	-0.11883
>tr|A0A0B4KHG5|A0A0B4KHG5_DROME Chaoptin, isoform C OS=Drosophila melanogaster OX=7227 GN=chp PE=1 SV=1	-0.310498		>tr|Q967S0|Q967S0_DROME Amidophosphoribosyltransferase OS=Drosophila melanogaster OX=7227 GN=Prat2 PE=2 SV=1	-0.11883
>tr|A0A0B4KHG5|A0A0B4KHG5_DROME Chaoptin, isoform C OS=Drosophila melanogaster OX=7227 GN=chp PE=1 SV=1	-0.310498		>tr|Q967S0|Q967S0_DROME Amidophosphoribosyltransferase OS=Drosophila melanogaster OX=7227 GN=Prat2 PE=2 SV=1	-0.11883
>tr|Q0E993|Q0E993_DROME Valyl-tRNA synthetase, isoform A OS=Drosophila melanogaster OX=7227 GN=ValRS PE=1 SV=1	-0.310677		>tr|A1Z729|A1Z729_DROME Uncharacterized protein OS=Drosophila melanogaster OX=7227 GN=Dmel\CG2064 PE=1 SV=1	-0.119091
>tr|Q0E993|Q0E993_DROME Valyl-tRNA synthetase, isoform A OS=Drosophila melanogaster OX=7227 GN=ValRS PE=1 SV=1	-0.310677		>tr|Q9VHK7|Q9VHK7_DROME GEO07179p1 OS=Drosophila melanogaster OX=7227 GN=anon-EST:Posey161 PE=1 SV=1	-0.119149
>tr|Q0E993|Q0E993_DROME Valyl-tRNA synthetase, isoform A OS=Drosophila melanogaster OX=7227 GN=ValRS PE=1 SV=1	-0.310677		>tr|Q9VHK7|Q9VHK7_DROME GEO07179p1 OS=Drosophila melanogaster OX=7227 GN=anon-EST:Posey161 PE=1 SV=1	-0.119149
>sp|Q9V496|APLP_DROME Apolipophorins OS=Drosophila melanogaster OX=7227 GN=apolpp PE=1 SV=2	-0.310743		>tr|Q9VB10|Q9VB10_DROME GH01709p OS=Drosophila melanogaster OX=7227 GN=Dmel\CG5590 PE=1 SV=1	-0.119417
>sp|Q9V496|APLP_DROME Apolipophorins OS=Drosophila melanogaster OX=7227 GN=apolpp PE=1 SV=2	-0.310743		>tr|Q9VB10|Q9VB10_DROME GH01709p OS=Drosophila melanogaster OX=7227 GN=Dmel\CG5590 PE=1 SV=1	-0.119417
>sp|Q9V496|APLP_DROME Apolipophorins OS=Drosophila melanogaster OX=7227 GN=apolpp PE=1 SV=2	-0.310743		>tr|Q9VB10|Q9VB10_DROME GH01709p OS=Drosophila melanogaster OX=7227 GN=Dmel\CG5590 PE=1 SV=1	-0.119417
>tr|Q7JQR3|Q7JQR3_DROME Sulfhydryl oxidase OS=Drosophila melanogaster OX=7227 GN=Qsox1 PE=1 SV=1	-0.310989		>tr|Q5U1B0|Q5U1B0_DROME Beta hydroxy acid dehydrogenase 2 OS=Drosophila melanogaster OX=7227 GN=Had2 PE=1 SV=1	-0.119683
>sp|O96827|EF1B_DROME Probable elongation factor 1-beta OS=Drosophila melanogaster OX=7227 GN=eEF1beta PE=1 SV=3	-0.311712		>tr|Q9VPZ5|Q9VPZ5_DROME GH04232p OS=Drosophila melanogaster OX=7227 GN=CT16527 PE=1 SV=1	-0.11985
>sp|O96827|EF1B_DROME Probable elongation factor 1-beta OS=Drosophila melanogaster OX=7227 GN=eEF1beta PE=1 SV=3	-0.311712		>tr|Q9VPZ5|Q9VPZ5_DROME GH04232p OS=Drosophila melanogaster OX=7227 GN=CT16527 PE=1 SV=1	-0.11985
>sp|O96827|EF1B_DROME Probable elongation factor 1-beta OS=Drosophila melanogaster OX=7227 GN=eEF1beta PE=1 SV=3	-0.311712		>tr|Q9VPZ5|Q9VPZ5_DROME GH04232p OS=Drosophila melanogaster OX=7227 GN=CT16527 PE=1 SV=1	-0.11985
>tr|Q7K860|Q7K860_DROME FI07231p OS=Drosophila melanogaster OX=7227 GN=TpnC4 PE=1 SV=1	-0.311765		>tr|A0A0B7P9G0|A0A0B7P9G0_DROME Unextended, isoform E OS=Drosophila melanogaster OX=7227 GN=uex PE=1 SV=1	-0.120264
>sp|Q23997|C5210_DROME Imaginal disk growth factor 6 OS=Drosophila melanogaster OX=7227 GN=Idgf6 PE=1 SV=2	-0.312389		>tr|A0A0B7P9G0|A0A0B7P9G0_DROME Unextended, isoform E OS=Drosophila melanogaster OX=7227 GN=uex PE=1 SV=1	-0.120264
>sp|Q23997|C5210_DROME Imaginal disk growth factor 6 OS=Drosophila melanogaster OX=7227 GN=Idgf6 PE=1 SV=2	-0.312389		>sp|Q07152|IMDH_DROME Inosine-5'-monophosphate dehydrogenase OS=Drosophila melanogaster OX=7227 GN=ras PE=1 SV=1	-0.121415
>sp|Q23997|C5210_DROME Imaginal disk growth factor 6 OS=Drosophila melanogaster OX=7227 GN=Idgf6 PE=1 SV=2	-0.312389		>sp|Q07152|IMDH_DROME Inosine-5'-monophosphate dehydrogenase OS=Drosophila melanogaster OX=7227 GN=ras PE=1 SV=1	-0.121415
>tr|Q9W2G9|Q9W2G9_DROME Acyl-coenzyme A oxidase OS=Drosophila melanogaster OX=7227 GN=Acox57D-p PE=1 SV=1	-0.312408		>sp|Q07152|IMDH_DROME Inosine-5'-monophosphate dehydrogenase OS=Drosophila melanogaster OX=7227 GN=ras PE=1 SV=1	-0.121415
>tr|Q8T4D6|Q8T4D6_DROME Aconitate hydratase, mitochondrial OS=Drosophila melanogaster OX=7227 GN=mAcon2 PE=2 SV=1	-0.312516		>sp|Q8IQV9|NU205_DROME Nuclear pore complex protein Nup205 OS=Drosophila melanogaster OX=7227 GN=Nup205 PE=2 SV=1	-0.121579
>tr|Q8T4D6|Q8T4D6_DROME Aconitate hydratase, mitochondrial OS=Drosophila melanogaster OX=7227 GN=mAcon2 PE=2 SV=1	-0.312516		>tr|Q9W4W5|Q9W4W5_DROME RE47284p OS=Drosophila melanogaster OX=7227 GN=Dmel\CG2680 PE=1 SV=2	-0.121639
>sp|Q9VTU4|EIF3L_DROME Eukaryotic translation initiation factor 3 subunit L OS=Drosophila melanogaster OX=7227 GN=eIF3l PE=2 SV=1	-0.312987		>tr|A4V0U4|A4V0U4_DROME Leukotriene A(4) hydrolase OS=Drosophila melanogaster OX=7227 GN=Dmel\CG10602 PE=1 SV=1	-0.12186
>sp|Q9VTU4|EIF3L_DROME Eukaryotic translation initiation factor 3 subunit L OS=Drosophila melanogaster OX=7227 GN=eIF3l PE=2 SV=1	-0.312987		>tr|A4V0U4|A4V0U4_DROME Leukotriene A(4) hydrolase OS=Drosophila melanogaster OX=7227 GN=Dmel\CG10602 PE=1 SV=1	-0.12186
>tr|O17452|O17452_DROME LD20793p OS=Drosophila melanogaster OX=7227 GN=Peritrophin-A PE=2 SV=1	-0.313478		>tr|A4V0U4|A4V0U4_DROME Leukotriene A(4) hydrolase OS=Drosophila melanogaster OX=7227 GN=Dmel\CG10602 PE=1 SV=1	-0.12186
>tr|O17452|O17452_DROME LD20793p OS=Drosophila melanogaster OX=7227 GN=Peritrophin-A PE=2 SV=1	-0.313478		>tr|Q9VHL2|Q9VHL2_DROME T-complex protein 1 subunit eta OS=Drosophila melanogaster OX=7227 GN=CCT7 PE=1 SV=2	-0.121875
>tr|O17452|O17452_DROME LD20793p OS=Drosophila melanogaster OX=7227 GN=Peritrophin-A PE=2 SV=1	-0.313478		>tr|Q9VHL2|Q9VHL2_DROME T-complex protein 1 subunit eta OS=Drosophila melanogaster OX=7227 GN=CCT7 PE=1 SV=2	-0.121875
>sp|Q9VFC2|SP88E_DROME Serine protease inhibitor 88Ea OS=Drosophila melanogaster OX=7227 GN=Spn88Ea PE=2 SV=1	-0.313817		>tr|Q9VHL2|Q9VHL2_DROME T-complex protein 1 subunit eta OS=Drosophila melanogaster OX=7227 GN=CCT7 PE=1 SV=2	-0.121875
>sp|Q9VFC2|SP88E_DROME Serine protease inhibitor 88Ea OS=Drosophila melanogaster OX=7227 GN=Spn88Ea PE=2 SV=1	-0.313817		>sp|Q9VHV5|ARL8_DROME ADP-ribosylation factor-like protein 8 OS=Drosophila melanogaster OX=7227 GN=Arl8 PE=1 SV=1	-0.122043
>sp|Q9VFC2|SP88E_DROME Serine protease inhibitor 88Ea OS=Drosophila melanogaster OX=7227 GN=Spn88Ea PE=2 SV=1	-0.313817		>sp|Q9VHV5|ARL8_DROME ADP-ribosylation factor-like protein 8 OS=Drosophila melanogaster OX=7227 GN=Arl8 PE=1 SV=1	-0.122043
>sp|Q9VFC2|SP88E_DROME Serine protease inhibitor 88Ea OS=Drosophila melanogaster OX=7227 GN=Spn88Ea PE=2 SV=1	-0.313817		>sp|Q9VHV5|ARL8_DROME ADP-ribosylation factor-like protein 8 OS=Drosophila melanogaster OX=7227 GN=Arl8 PE=1 SV=1	-0.122043
>tr|Q8IMX4|Q8IMX4_DROME FI04408p OS=Drosophila melanogaster OX=7227 GN=Rox8 PE=1 SV=1	-0.315106		>tr|A1Z6N5|A1Z6N5_DROME FI13301p OS=Drosophila melanogaster OX=7227 GN=Dmel\CG3270 PE=1 SV=1	-0.122273
>tr|Q8IMX4|Q8IMX4_DROME FI04408p OS=Drosophila melanogaster OX=7227 GN=Rox8 PE=1 SV=1	-0.315106		>tr|Q9VEZ6|Q9VEZ6_DROME Uncharacterized protein, isoform A OS=Drosophila melanogaster OX=7227 GN=cg10407 PE=1 SV=1	-0.122394
>tr|Q95R98|Q95R98_DROME Protein phosphatase methylesterase 1 OS=Drosophila melanogaster OX=7227 GN=Dmel\CG5068 PE=1 SV=1	-0.315159		>tr|Q9VEZ6|Q9VEZ6_DROME Uncharacterized protein, isoform A OS=Drosophila melanogaster OX=7227 GN=cg10407 PE=1 SV=1	-0.122394
>tr|A0A0B4KEU5|A0A0B4KEU5_DROME Coronin OS=Drosophila melanogaster OX=7227 GN=coro PE=1 SV=1	-0.315169		>tr|Q9VEZ6|Q9VEZ6_DROME Uncharacterized protein, isoform A OS=Drosophila melanogaster OX=7227 GN=cg10407 PE=1 SV=1	-0.122394
>tr|Q9VD61|Q9VD61_DROME Sulfhydryl oxidase OS=Drosophila melanogaster OX=7227 GN=Qsox2 PE=2 SV=1	-0.315217		>sp|P25007|PPIA_DROME Peptidyl-prolyl cis-trans isomerase OS=Drosophila melanogaster OX=7227 GN=Cyp1 PE=1 SV=2	-0.122467
>sp|Q95T19|SLIMP_DROME Serine--tRNA synthetase-like protein Slimp OS=Drosophila melanogaster OX=7227 GN=Slimp PE=1 SV=1	-0.315517		>sp|P25007|PPIA_DROME Peptidyl-prolyl cis-trans isomerase OS=Drosophila melanogaster OX=7227 GN=Cyp1 PE=1 SV=2	-0.122467
>tr|Q9VBR6|Q9VBR6_DROME RE74917p OS=Drosophila melanogaster OX=7227 GN=tobi PE=2 SV=1	-0.31583		>sp|P25007|PPIA_DROME Peptidyl-prolyl cis-trans isomerase OS=Drosophila melanogaster OX=7227 GN=Cyp1 PE=1 SV=2	-0.122467
>sp|Q9VY93|MTNB_DROME Probable methylthioribulose-1-phosphate dehydratase OS=Drosophila melanogaster OX=7227 GN=CG11134 PE=2 SV=1	-0.315859		>tr|Q9VN86|Q9VN86_DROME AT14148p OS=Drosophila melanogaster OX=7227 GN=Sccpdh1 PE=1 SV=1	-0.122558
>sp|Q9VY93|MTNB_DROME Probable methylthioribulose-1-phosphate dehydratase OS=Drosophila melanogaster OX=7227 GN=CG11134 PE=2 SV=1	-0.315859		>tr|Q9VN86|Q9VN86_DROME AT14148p OS=Drosophila melanogaster OX=7227 GN=Sccpdh1 PE=1 SV=1	-0.122558
>tr|Q9VSW2|Q9VSW2_DROME UTP--glucose-1-phosphate uridylyltransferase OS=Drosophila melanogaster OX=7227 GN=UGP PE=1 SV=2	-0.316374		>tr|Q9VN86|Q9VN86_DROME AT14148p OS=Drosophila melanogaster OX=7227 GN=Sccpdh1 PE=1 SV=1	-0.122558
>tr|Q9VSW2|Q9VSW2_DROME UTP--glucose-1-phosphate uridylyltransferase OS=Drosophila melanogaster OX=7227 GN=UGP PE=1 SV=2	-0.316374		>tr|O76268|O76268_DROME LD11641p OS=Drosophila melanogaster OX=7227 GN=NTPase PE=1 SV=1	-0.12256
>tr|Q9VSW2|Q9VSW2_DROME UTP--glucose-1-phosphate uridylyltransferase OS=Drosophila melanogaster OX=7227 GN=UGP PE=1 SV=2	-0.316374		>sp|P91938|TRXR1_DROME Thioredoxin reductase 1, mitochondrial OS=Drosophila melanogaster OX=7227 GN=Trxr-1 PE=1 SV=2	-0.122651
>tr|Q9Y168|Q9Y168_DROME BcDNA.GH02384 OS=Drosophila melanogaster OX=7227 GN=BcDNA.GH02384 PE=2 SV=1	-0.31639		>sp|P91938|TRXR1_DROME Thioredoxin reductase 1, mitochondrial OS=Drosophila melanogaster OX=7227 GN=Trxr-1 PE=1 SV=2	-0.122651
>sp|Q94523|SDHA_DROME Succinate dehydrogenase [ubiquinone] flavoprotein subunit, mitochondrial OS=Drosophila melanogaster OX=7227 GN=SdhA PE=2 SV=3	-0.31649		>sp|P91938|TRXR1_DROME Thioredoxin reductase 1, mitochondrial OS=Drosophila melanogaster OX=7227 GN=Trxr-1 PE=1 SV=2	-0.122651
>sp|Q94523|SDHA_DROME Succinate dehydrogenase [ubiquinone] flavoprotein subunit, mitochondrial OS=Drosophila melanogaster OX=7227 GN=SdhA PE=2 SV=3	-0.31649		>tr|Q9VPR7|Q9VPR7_DROME Coiled, isoform A OS=Drosophila melanogaster OX=7227 GN=cold PE=2 SV=1	-0.122876
>sp|Q94523|SDHA_DROME Succinate dehydrogenase [ubiquinone] flavoprotein subunit, mitochondrial OS=Drosophila melanogaster OX=7227 GN=SdhA PE=2 SV=3	-0.31649		>tr|Q9VPR7|Q9VPR7_DROME Coiled, isoform A OS=Drosophila melanogaster OX=7227 GN=cold PE=2 SV=1	-0.122876
>tr|A0A0B4K6W2|A0A0B4K6W2_DROME Fat facets, isoform E OS=Drosophila melanogaster OX=7227 GN=faf PE=3 SV=1	-0.316552		>tr|Q9VPR7|Q9VPR7_DROME Coiled, isoform A OS=Drosophila melanogaster OX=7227 GN=cold PE=2 SV=1	-0.122876
>tr|Q9VW68|Q9VW68_DROME Gamma-aminobutyric acid transaminase, isoform A OS=Drosophila melanogaster OX=7227 GN=Gabat PE=1 SV=1	-0.316667		>tr|Q9VI64|Q9VI64_DROME LD30995p OS=Drosophila melanogaster OX=7227 GN=Dmel\CG10098 PE=1 SV=1	-0.123229
>tr|Q9VGE9|Q9VGE9_DROME GH11519p OS=Drosophila melanogaster OX=7227 GN=mfas PE=1 SV=1	-0.316667		>tr|Q9VI64|Q9VI64_DROME LD30995p OS=Drosophila melanogaster OX=7227 GN=Dmel\CG10098 PE=1 SV=1	-0.123229
>tr|Q9VW68|Q9VW68_DROME Gamma-aminobutyric acid transaminase, isoform A OS=Drosophila melanogaster OX=7227 GN=Gabat PE=1 SV=1	-0.316667		>tr|Q9VI64|Q9VI64_DROME LD30995p OS=Drosophila melanogaster OX=7227 GN=Dmel\CG10098 PE=1 SV=1	-0.123229
>tr|Q9VGE9|Q9VGE9_DROME GH11519p OS=Drosophila melanogaster OX=7227 GN=mfas PE=1 SV=1	-0.316667		>tr|Q9W0H2|Q9W0H2_DROME HECT and RLD domain containing E3 ubiquitin ligase 4, isoform A OS=Drosophila melanogaster OX=7227 GN=Herc4 PE=1 SV=2	-0.123535
>tr|Q9VW68|Q9VW68_DROME Gamma-aminobutyric acid transaminase, isoform A OS=Drosophila melanogaster OX=7227 GN=Gabat PE=1 SV=1	-0.316667		>sp|Q95083|PSA5_DROME Proteasome subunit alpha type-5 OS=Drosophila melanogaster OX=7227 GN=Prosalpha5 PE=2 SV=2	-0.12377
>tr|Q9VIE8|Q9VIE8_DROME Aconitate hydratase, mitochondrial OS=Drosophila melanogaster OX=7227 GN=mAcon1 PE=1 SV=2	-0.317535		>sp|Q95083|PSA5_DROME Proteasome subunit alpha type-5 OS=Drosophila melanogaster OX=7227 GN=Prosalpha5 PE=2 SV=2	-0.12377
>tr|Q9VIE8|Q9VIE8_DROME Aconitate hydratase, mitochondrial OS=Drosophila melanogaster OX=7227 GN=mAcon1 PE=1 SV=2	-0.317535		>sp|Q95083|PSA5_DROME Proteasome subunit alpha type-5 OS=Drosophila melanogaster OX=7227 GN=Prosalpha5 PE=2 SV=2	-0.12377
>tr|Q9VIE8|Q9VIE8_DROME Aconitate hydratase, mitochondrial OS=Drosophila melanogaster OX=7227 GN=mAcon1 PE=1 SV=2	-0.317535		>sp|O01666|ATPG_DROME ATP synthase subunit gamma, mitochondrial OS=Drosophila melanogaster OX=7227 GN=ATPsyngamma PE=2 SV=2	-0.123906
>sp|Q8T079|GLYR1_DROME Putative oxidoreductase GLYR1 homolog OS=Drosophila melanogaster OX=7227 GN=Ndf PE=1 SV=1	-0.319103		>sp|O01666|ATPG_DROME ATP synthase subunit gamma, mitochondrial OS=Drosophila melanogaster OX=7227 GN=ATPsyngamma PE=2 SV=2	-0.123906
>tr|Q8IPH5|Q8IPH5_DROME Thioester-containing protein 2, isoform F OS=Drosophila melanogaster OX=7227 GN=Tep2 PE=1 SV=2	-0.319357		>sp|O01666|ATPG_DROME ATP synthase subunit gamma, mitochondrial OS=Drosophila melanogaster OX=7227 GN=ATPsyngamma PE=2 SV=2	-0.123906
>tr|Q8IPH5|Q8IPH5_DROME Thioester-containing protein 2, isoform F OS=Drosophila melanogaster OX=7227 GN=Tep2 PE=1 SV=2	-0.319357		>tr|Q8MLS2|Q8MLS2_DROME Ribose-5-phosphate isomerase, isoform B OS=Drosophila melanogaster OX=7227 GN=Rpi PE=1 SV=3	-0.124481
>tr|Q8IPH5|Q8IPH5_DROME Thioester-containing protein 2, isoform F OS=Drosophila melanogaster OX=7227 GN=Tep2 PE=1 SV=2	-0.319357		>tr|Q7JVZ8|Q7JVZ8_DROME Glutathione S transferase E11, isoform A OS=Drosophila melanogaster OX=7227 GN=GstE11 PE=1 SV=1	-0.124889
>tr|A0A0B4K689|A0A0B4K689_DROME Center divider, isoform B OS=Drosophila melanogaster OX=7227 GN=cdi PE=4 SV=1	-0.319639		>tr|Q7JVZ8|Q7JVZ8_DROME Glutathione S transferase E11, isoform A OS=Drosophila melanogaster OX=7227 GN=GstE11 PE=1 SV=1	-0.124889
>tr|Q9VD01|Q9VD01_DROME LP12095p OS=Drosophila melanogaster OX=7227 GN=Pebp1 PE=1 SV=1	-0.320455		>sp|Q9W0Y6|PAIN_DROME Transient receptor potential cation channel protein painless OS=Drosophila melanogaster OX=7227 GN=pain PE=1 SV=1	-0.125082
>tr|Q9VD01|Q9VD01_DROME LP12095p OS=Drosophila melanogaster OX=7227 GN=Pebp1 PE=1 SV=1	-0.320455		>sp|O76879|CCCP_DROME Circadian clock-controlled protein OS=Drosophila melanogaster OX=7227 GN=anon-3B1.2 PE=2 SV=2	-0.125385
>tr|Q9VD01|Q9VD01_DROME LP12095p OS=Drosophila melanogaster OX=7227 GN=Pebp1 PE=1 SV=1	-0.320455		>sp|O76879|CCCP_DROME Circadian clock-controlled protein daywake OS=Drosophila melanogaster OX=7227 GN=dyw PE=2 SV=2	-0.125385
>sp|Q9VV72|MINP1_DROME Multiple inositol polyphosphate phosphatase 1 OS=Drosophila melanogaster OX=7227 GN=Mipp1 PE=1 SV=2	-0.320557		>tr|Q9VG79|Q9VG79_DROME Dipeptidase C, isoform A OS=Drosophila melanogaster OX=7227 GN=Dip-C PE=1 SV=2	-0.126477
>sp|Q9VV72|MINP1_DROME Multiple inositol polyphosphate phosphatase 1 OS=Drosophila melanogaster OX=7227 GN=Mipp1 PE=1 SV=2	-0.320557		>tr|Q9VG79|Q9VG79_DROME Dipeptidase C, isoform A OS=Drosophila melanogaster OX=7227 GN=Dip-C PE=1 SV=2	-0.126477
>tr|Q8T0L3|Q8T0L3_DROME GH24511p OS=Drosophila melanogaster OX=7227 GN=Uba1 PE=1 SV=1	-0.321411		>tr|Q8IPT1|Q8IPT1_DROME Uncharacterized protein, isoform D OS=Drosophila melanogaster OX=7227 GN=EMC10 PE=1 SV=2	-0.127103
>tr|Q8T0L3|Q8T0L3_DROME GH24511p OS=Drosophila melanogaster OX=7227 GN=Uba1 PE=1 SV=1	-0.321411		>sp|P48159|RL23_DROME 60S ribosomal protein L23 OS=Drosophila melanogaster OX=7227 GN=RpL23 PE=1 SV=2	-0.127143
>tr|Q8T0L3|Q8T0L3_DROME GH24511p OS=Drosophila melanogaster OX=7227 GN=Uba1 PE=1 SV=1	-0.321411		>sp|P48159|RL23_DROME 60S ribosomal protein L23 OS=Drosophila melanogaster OX=7227 GN=RpL23 PE=1 SV=2	-0.127143
>tr|M9PDP3|M9PDP3_DROME Fondue, isoform D OS=Drosophila melanogaster OX=7227 GN=fon PE=1 SV=1	-0.321603		>sp|P48159|RL23_DROME 60S ribosomal protein L23 OS=Drosophila melanogaster OX=7227 GN=RpL23 PE=1 SV=2	-0.127143
>sp|Q9VCH5|NUP98_DROME Nuclear pore complex protein Nup98-Nup96 OS=Drosophila melanogaster OX=7227 GN=Nup98-96 PE=1 SV=3	-0.321837		>tr|Q9VKY3|Q9VKY3_DROME ATP-dependent Clp protease proteolytic subunit OS=Drosophila melanogaster OX=7227 GN=ClpP PE=1 SV=1	-0.127273
>sp|Q9VMW7|ITPA_DROME Inosine triphosphate pyrophosphatase OS=Drosophila melanogaster OX=7227 GN=CG8891 PE=2 SV=1	-0.32199		>sp|Q9V6U9|MECR_DROME Enoyl-[acyl-carrier-protein] reductase, mitochondrial OS=Drosophila melanogaster OX=7227 GN=CG16935 PE=3 SV=2	-0.127451
>tr|Q9VDT5|Q9VDT5_DROME Carboxypeptidase OS=Drosophila melanogaster OX=7227 GN=anon-WO02059370.13 PE=1 SV=1	-0.321992		>sp|Q9V6U9|MECR_DROME Enoyl-[acyl-carrier-protein] reductase, mitochondrial OS=Drosophila melanogaster OX=7227 GN=CG16935 PE=3 SV=2	-0.127451
>tr|Q9VDT5|Q9VDT5_DROME Carboxypeptidase OS=Drosophila melanogaster OX=7227 GN=anon-WO02059370.13 PE=1 SV=1	-0.321992		>sp|Q9V6U9|MECR_DROME Enoyl-[acyl-carrier-protein] reductase, mitochondrial OS=Drosophila melanogaster OX=7227 GN=CG16935 PE=3 SV=2	-0.127451
>tr|Q9VK12|Q9VK12_DROME GH20621p OS=Drosophila melanogaster OX=7227 GN=cg5945 PE=1 SV=1	-0.322		>tr|A8JV19|A8JV19_DROME Uncharacterized protein, isoform E OS=Drosophila melanogaster OX=7227 GN=Dmel\CG4829 PE=1 SV=1	-0.127459
>tr|Q9VK12|Q9VK12_DROME GH20621p OS=Drosophila melanogaster OX=7227 GN=cg5945 PE=1 SV=1	-0.322		>tr|A8JV19|A8JV19_DROME Uncharacterized protein, isoform E OS=Drosophila melanogaster OX=7227 GN=Dmel\CG4829 PE=1 SV=1	-0.127459
>tr|Q9VK12|Q9VK12_DROME GH20621p OS=Drosophila melanogaster OX=7227 GN=cg5945 PE=1 SV=1	-0.322		>tr|A8JV19|A8JV19_DROME Uncharacterized protein, isoform E OS=Drosophila melanogaster OX=7227 GN=Dmel\CG4829 PE=1 SV=1	-0.127459
>sp|Q9W0P5|GALE_DROME UDP-glucose 4-epimerase OS=Drosophila melanogaster OX=7227 GN=Gale PE=1 SV=1	-0.322571		>tr|Q9W038|Q9W038_DROME Adenylyl cyclase X D, isoform A OS=Drosophila melanogaster OX=7227 GN=ACXD PE=2 SV=2	-0.127625
>sp|Q9W0P5|GALE_DROME UDP-glucose 4-epimerase OS=Drosophila melanogaster OX=7227 GN=Gale PE=1 SV=1	-0.322571		>tr|Q9W330|Q9W330_DROME Phosphotransferase OS=Drosophila melanogaster OX=7227 GN=Hex-A PE=1 SV=1	-0.127726
>sp|O44342|WBL_DROME Protein windbeutel OS=Drosophila melanogaster OX=7227 GN=wbl PE=1 SV=1	-0.323346		>tr|Q9W330|Q9W330_DROME Phosphotransferase OS=Drosophila melanogaster OX=7227 GN=Hex-A PE=1 SV=1	-0.127726
>tr|Q9VGA0|Q9VGA0_DROME Glutathione S transferase D9, isoform A OS=Drosophila melanogaster OX=7227 GN=GstD9 PE=1 SV=1	-0.323853		>tr|Q9W330|Q9W330_DROME Phosphotransferase OS=Drosophila melanogaster OX=7227 GN=Hex-A PE=1 SV=1	-0.127726
>tr|Q9Y0Y5|Q9Y0Y5_DROME Coatomer subunit epsilon OS=Drosophila melanogaster OX=7227 GN=epsilonCOP PE=1 SV=1	-0.32451		>tr|Q9VS00|Q9VS00_DROME WD_REPEATS_REGION domain-containing protein OS=Drosophila melanogaster OX=7227 GN=Dmel\CG10064 PE=4 SV=1	-0.127898
>sp|P47947|TNNC1_DROME Troponin C, isoform 1 OS=Drosophila melanogaster OX=7227 GN=TpnC41C PE=2 SV=2	-0.324675		>tr|B7YZF6|B7YZF6_DROME Phospholipid-transporting ATPase OS=Drosophila melanogaster OX=7227 GN=ATP8A PE=3 SV=1	-0.127922
>tr|A0A0B4K6V8|A0A0B4K6V8_DROME Alpha-Esterase-5, isoform B OS=Drosophila melanogaster OX=7227 GN=alpha-Est5 PE=1 SV=1	-0.324678		>tr|B7YZF6|B7YZF6_DROME Phospholipid-transporting ATPase OS=Drosophila melanogaster OX=7227 GN=ATP8A PE=3 SV=1	-0.127922
>tr|Q8MT58|Q8MT58_DROME RE11562p OS=Drosophila melanogaster OX=7227 GN=Cndp2 PE=1 SV=1	-0.325941		>sp|P10351|XDH_DROME Xanthine dehydrogenase OS=Drosophila melanogaster OX=7227 GN=ry PE=2 SV=2	-0.128015
>tr|Q9VRL0|Q9VRL0_DROME Cytochrome c1, isoform A OS=Drosophila melanogaster OX=7227 GN=Cyt-c1 PE=1 SV=1	-0.326059		>tr|Q9VGZ3|Q9VGZ3_DROME Iron regulatory protein 1B OS=Drosophila melanogaster OX=7227 GN=Irp-1B PE=1 SV=1	-0.128476
>sp|P81641|AMYB_DROME Alpha-amylase B OS=Drosophila melanogaster OX=7227 GN=Amy-d PE=3 SV=3	-0.327126		>tr|Q9VGZ3|Q9VGZ3_DROME Iron regulatory protein 1B OS=Drosophila melanogaster OX=7227 GN=Irp-1B PE=1 SV=1	-0.128476
>tr|Q961E7|Q961E7_DROME GH28523p OS=Drosophila melanogaster OX=7227 GN=PhKgamma PE=2 SV=1	-0.327685		>tr|Q9VGZ3|Q9VGZ3_DROME Iron regulatory protein 1B OS=Drosophila melanogaster OX=7227 GN=Irp-1B PE=1 SV=1	-0.128476
>tr|Q961E7|Q961E7_DROME GH28523p OS=Drosophila melanogaster OX=7227 GN=PhKgamma PE=2 SV=1	-0.327685		>tr|Q7JYZ9|Q7JYZ9_DROME Glutathione S transferase E2 OS=Drosophila melanogaster OX=7227 GN=GstE2 PE=2 SV=1	-0.128507
>tr|Q961E7|Q961E7_DROME GH28523p OS=Drosophila melanogaster OX=7227 GN=PhKgamma PE=2 SV=1	-0.327685		>tr|Q7JYZ9|Q7JYZ9_DROME Glutathione S transferase E2 OS=Drosophila melanogaster OX=7227 GN=GstE2 PE=2 SV=1	-0.128507
>tr|Q0E8H9|Q0E8H9_DROME Beta-hexosaminidase OS=Drosophila melanogaster OX=7227 GN=Hexo1 PE=1 SV=1	-0.328135		>tr|Q7JYZ9|Q7JYZ9_DROME Glutathione S transferase E2 OS=Drosophila melanogaster OX=7227 GN=GstE2 PE=2 SV=1	-0.128507
>tr|Q0E8H9|Q0E8H9_DROME Beta-hexosaminidase OS=Drosophila melanogaster OX=7227 GN=Hexo1 PE=1 SV=1	-0.328135		>tr|Q9W0M4|Q9W0M4_DROME LP10861p OS=Drosophila melanogaster OX=7227 GN=Dmel\CG13887 PE=1 SV=1	-0.128509
>tr|Q8IQQ0|Q8IQQ0_DROME Neural conserved at 73EF, isoform F OS=Drosophila melanogaster OX=7227 GN=Nc73EF PE=1 SV=1	-0.328319		>tr|Q9W0M4|Q9W0M4_DROME Endoplasmic reticulum transmembrane protein OS=Drosophila melanogaster OX=7227 GN=Dmel\CG13887 PE=1 SV=1	-0.128509
>tr|Q8IQQ0|Q8IQQ0_DROME Neural conserved at 73EF, isoform F OS=Drosophila melanogaster OX=7227 GN=Nc73EF PE=1 SV=1	-0.328319		>tr|Q9W0M4|Q9W0M4_DROME Endoplasmic reticulum transmembrane protein OS=Drosophila melanogaster OX=7227 GN=Dmel\CG13887 PE=1 SV=1	-0.128509
>tr|Q6NMY2|Q6NMY2_DROME RH54371p OS=Drosophila melanogaster OX=7227 GN=BEST:GH10831 PE=2 SV=1	-0.328571		>tr|Q9VPY2|Q9VPY2_DROME Phospholipase A2 activator protein, isoform A OS=Drosophila melanogaster OX=7227 GN=Plap PE=1 SV=1	-0.12859
>tr|Q6NMY2|Q6NMY2_DROME RH54371p OS=Drosophila melanogaster OX=7227 GN=BEST:GH10831 PE=2 SV=1	-0.328571		>tr|Q9VPY2|Q9VPY2_DROME Phospholipase A2 activator protein, isoform A OS=Drosophila melanogaster OX=7227 GN=Plap PE=1 SV=1	-0.12859
>tr|Q6NMY2|Q6NMY2_DROME RH54371p OS=Drosophila melanogaster OX=7227 GN=BEST:GH10831 PE=2 SV=1	-0.328571		>tr|Q9VPY2|Q9VPY2_DROME Phospholipase A2 activator protein, isoform A OS=Drosophila melanogaster OX=7227 GN=Plap PE=1 SV=1	-0.12859
>tr|A0A0B4LEQ0|A0A0B4LEQ0_DROME Uncharacterized protein, isoform C OS=Drosophila melanogaster OX=7227 GN=Cndp2 PE=1 SV=1	-0.329234		>tr|Q9VB79|Q9VB79_DROME IP09473p OS=Drosophila melanogaster OX=7227 GN=Dmel\CG14259 PE=2 SV=1	-0.12872
>tr|A0A0B4LEQ0|A0A0B4LEQ0_DROME Uncharacterized protein, isoform C OS=Drosophila melanogaster OX=7227 GN=Cndp2 PE=1 SV=1	-0.329234		>tr|Q9VB79|Q9VB79_DROME IP09473p OS=Drosophila melanogaster OX=7227 GN=Dmel\CG14259 PE=2 SV=1	-0.12872
>tr|C9QPE7|C9QPE7_DROME Trehalose 6-phosphate phosphatase OS=Drosophila melanogaster OX=7227 GN=CG5171-RC PE=1 SV=1	-0.330405		>sp|Q7JWD3|ASNA_DROME ATPase ASNA1 homolog OS=Drosophila melanogaster OX=7227 GN=CG1598 PE=2 SV=1	-0.128869
>sp|P25161|PSMD3_DROME Probable 26S proteasome non-ATPase regulatory subunit 3 OS=Drosophila melanogaster OX=7227 GN=Rpn3 PE=2 SV=1	-0.331579		>sp|Q7JWD3|ASNA_DROME ATPase ASNA1 homolog OS=Drosophila melanogaster OX=7227 GN=CG1598 PE=2 SV=1	-0.128869
>sp|P06742|MLC1_DROME Myosin light chain alkali OS=Drosophila melanogaster OX=7227 GN=Mlc1 PE=1 SV=4	-0.331613		>tr|Q9VVU1|Q9VVU1_DROME FI09602p OS=Drosophila melanogaster OX=7227 GN=GH07925p PE=1 SV=1	-0.128986
>sp|P06742|MLC1_DROME Myosin light chain alkali OS=Drosophila melanogaster OX=7227 GN=Mlc1 PE=1 SV=4	-0.331613		>tr|Q9VVU1|Q9VVU1_DROME FI09602p OS=Drosophila melanogaster OX=7227 GN=GH07925p PE=1 SV=1	-0.128986
>tr|X2J8B3|X2J8B3_DROME Black, isoform C OS=Drosophila melanogaster OX=7227 GN=b PE=1 SV=1	-0.33249		>tr|Q9VVU1|Q9VVU1_DROME FI09602p OS=Drosophila melanogaster OX=7227 GN=GH07925p PE=1 SV=1	-0.128986
>tr|Q9VMF0|Q9VMF0_DROME FI04444p OS=Drosophila melanogaster OX=7227 GN=Dmel\CG9498 PE=1 SV=1	-0.332547		>tr|Q9VSV3|Q9VSV3_DROME Palmitoyltransferase OS=Drosophila melanogaster OX=7227 GN=Dmel\CG4483 PE=3 SV=1	-0.129195
>tr|Q9VMF0|Q9VMF0_DROME FI04444p OS=Drosophila melanogaster OX=7227 GN=Dmel\CG9498 PE=1 SV=1	-0.332547		>tr|M9PC31|M9PC31_DROME Nicotinate phosphoribosyltransferase OS=Drosophila melanogaster OX=7227 GN=Naprt PE=3 SV=1	-0.129273
>tr|Q9VYD9|Q9VYD9_DROME AT04676p OS=Drosophila melanogaster OX=7227 GN=ALT PE=1 SV=3	-0.334435		>tr|M9PC31|M9PC31_DROME Nicotinate phosphoribosyltransferase OS=Drosophila melanogaster OX=7227 GN=Naprt PE=3 SV=1	-0.129273
>tr|Q9VYD9|Q9VYD9_DROME AT04676p OS=Drosophila melanogaster OX=7227 GN=ALT PE=1 SV=3	-0.334435		>tr|M9PC31|M9PC31_DROME Nicotinate phosphoribosyltransferase OS=Drosophila melanogaster OX=7227 GN=Naprt PE=3 SV=1	-0.129273
>tr|Q9VYD9|Q9VYD9_DROME AT04676p OS=Drosophila melanogaster OX=7227 GN=ALT PE=1 SV=3	-0.334435		>tr|Q9VJ31|Q9VJ31_DROME CG10623 protein OS=Drosophila melanogaster OX=7227 GN=Dmel\CG10623 PE=1 SV=1	-0.130514
>tr|Q7JZZ3|Q7JZZ3_DROME RE03883p OS=Drosophila melanogaster OX=7227 GN=Dmel\CG13321 PE=1 SV=1	-0.334615		>tr|Q9VJ31|Q9VJ31_DROME CG10623 protein OS=Drosophila melanogaster OX=7227 GN=Dmel\CG10623 PE=1 SV=1	-0.130514
>tr|Q7JZZ3|Q7JZZ3_DROME RE03883p OS=Drosophila melanogaster OX=7227 GN=Dmel\CG13321 PE=1 SV=1	-0.334615		>tr|Q7KVR8|Q7KVR8_DROME AP-1 complex subunit gamma OS=Drosophila melanogaster OX=7227 GN=AP-1gamma PE=1 SV=1	-0.130754
>tr|Q7JZZ3|Q7JZZ3_DROME RE03883p OS=Drosophila melanogaster OX=7227 GN=Dmel\CG13321 PE=1 SV=1	-0.334615		>tr|Q9VJI5|Q9VJI5_DROME LD43175p OS=Drosophila melanogaster OX=7227 GN=yellow-b PE=2 SV=1	-0.130905
>tr|Q9W5W7|Q9W5W7_DROME GH19483p OS=Drosophila melanogaster OX=7227 GN=Dmel\CG9581 PE=1 SV=1	-0.334679		>tr|Q9VJI5|Q9VJI5_DROME LD43175p OS=Drosophila melanogaster OX=7227 GN=yellow-b PE=2 SV=1	-0.130905
>tr|Q7KVX1|Q7KVX1_DROME Pyruvate dehydrogenase E1 component subunit alpha OS=Drosophila melanogaster OX=7227 GN=Pdha PE=1 SV=1	-0.334763		>tr|Q9VJI5|Q9VJI5_DROME LD43175p OS=Drosophila melanogaster OX=7227 GN=yellow-b PE=2 SV=1	-0.130905
>tr|Q7KVX1|Q7KVX1_DROME Pyruvate dehydrogenase E1 component subunit alpha OS=Drosophila melanogaster OX=7227 GN=Pdha PE=1 SV=1	-0.334763		>tr|Q9W374|Q9W374_DROME Dihydropyrimidine dehydrogenase [NADP(+)] OS=Drosophila melanogaster OX=7227 GN=su(r) PE=1 SV=2	-0.130941
>tr|Q8INP9|Q8INP9_DROME RE51612p OS=Drosophila melanogaster OX=7227 GN=Dmel\CG11980 PE=1 SV=1	-0.334819		>tr|Q9W374|Q9W374_DROME Dihydropyrimidine dehydrogenase [NADP(+)] OS=Drosophila melanogaster OX=7227 GN=su(r) PE=1 SV=2	-0.130941
>tr|Q8INP9|Q8INP9_DROME RE51612p OS=Drosophila melanogaster OX=7227 GN=Dmel\CG11980 PE=1 SV=1	-0.334819		>tr|Q9W374|Q9W374_DROME Dihydropyrimidine dehydrogenase [NADP(+)] OS=Drosophila melanogaster OX=7227 GN=su(r) PE=1 SV=2	-0.130941
>tr|Q8INP9|Q8INP9_DROME RE51612p OS=Drosophila melanogaster OX=7227 GN=Dmel\CG11980 PE=1 SV=1	-0.334819		>tr|Q8T0T2|Q8T0T2_DROME GH09296p OS=Drosophila melanogaster OX=7227 GN=glob1 PE=1 SV=1	-0.131343
>tr|Q9VY78|Q9VY78_DROME Chloride intracellular channel, isoform A OS=Drosophila melanogaster OX=7227 GN=Clic PE=1 SV=1	-0.335		>sp|Q9NK57|NIF3L_DROME NIF3-like protein 1 OS=Drosophila melanogaster OX=7227 GN=anon-35F/36A PE=1 SV=3	-0.131849
>tr|Q8I941|Q8I941_DROME GH16843p OS=Drosophila melanogaster OX=7227 GN=CG2159 PE=2 SV=1	-0.335135		>sp|Q9NK57|NIF3L_DROME NIF3-like protein 1 OS=Drosophila melanogaster OX=7227 GN=anon-35F/36A PE=1 SV=3	-0.131849
>tr|Q8I941|Q8I941_DROME GH16843p OS=Drosophila melanogaster OX=7227 GN=CG2159 PE=2 SV=1	-0.335135		>sp|Q9VW09|LTN1_DROME E3 ubiquitin-protein ligase listerin OS=Drosophila melanogaster OX=7227 GN=Ltn1 PE=1 SV=2	-0.132055
>tr|Q8I941|Q8I941_DROME GH16843p OS=Drosophila melanogaster OX=7227 GN=CG2159 PE=2 SV=1	-0.335135		>tr|Q9VB64|Q9VB64_DROME Uncharacterized protein, isoform A OS=Drosophila melanogaster OX=7227 GN=CG31063 PE=1 SV=3	-0.133019
>tr|Q9VBT1|Q9VBT1_DROME CHK domain-containing protein OS=Drosophila melanogaster OX=7227 GN=Dmel\CG31098 PE=1 SV=2	-0.335492		>tr|Q9VB64|Q9VB64_DROME Uncharacterized protein, isoform A OS=Drosophila melanogaster OX=7227 GN=CG31063 PE=1 SV=3	-0.133019
>tr|Q9VBT1|Q9VBT1_DROME CHK domain-containing protein OS=Drosophila melanogaster OX=7227 GN=Dmel\CG31098 PE=1 SV=2	-0.335492		>tr|Q9VB64|Q9VB64_DROME Uncharacterized protein, isoform A OS=Drosophila melanogaster OX=7227 GN=CG31063 PE=1 SV=3	-0.133019
>tr|Q9VBT1|Q9VBT1_DROME CHK domain-containing protein OS=Drosophila melanogaster OX=7227 GN=Dmel\CG31098 PE=1 SV=2	-0.335492		>tr|Q9W0Y5|Q9W0Y5_DROME Fatty acyl-CoA reductase OS=Drosophila melanogaster OX=7227 GN=Dmel\CG30427 PE=2 SV=2	-0.133066
>sp|P48596|GCH1_DROME GTP cyclohydrolase 1 OS=Drosophila melanogaster OX=7227 GN=Pu PE=1 SV=3	-0.336111		>tr|Q9W0Y5|Q9W0Y5_DROME Fatty acyl-CoA reductase OS=Drosophila melanogaster OX=7227 GN=Dmel\CG30427 PE=2 SV=2	-0.133066
>sp|P48596|GCH1_DROME GTP cyclohydrolase 1 OS=Drosophila melanogaster OX=7227 GN=Pu PE=1 SV=3	-0.336111		>sp|Q9V595|DCUP_DROME Uroporphyrinogen decarboxylase OS=Drosophila melanogaster OX=7227 GN=Updo PE=3 SV=1	-0.133146
>sp|P48596|GCH1_DROME GTP cyclohydrolase 1 OS=Drosophila melanogaster OX=7227 GN=Pu PE=1 SV=3	-0.336111		>sp|Q9V595|DCUP_DROME Uroporphyrinogen decarboxylase OS=Drosophila melanogaster OX=7227 GN=Updo PE=3 SV=1	-0.133146
>tr|Q7K1M4|Q7K1M4_DROME SD04017p OS=Drosophila melanogaster OX=7227 GN=Dmel\CG1902 PE=1 SV=1	-0.336538		>tr|Q9VIM0|Q9VIM0_DROME GH14278p OS=Drosophila melanogaster OX=7227 GN=38C.55 PE=1 SV=1	-0.133263
>tr|Q7K1M4|Q7K1M4_DROME SD04017p OS=Drosophila melanogaster OX=7227 GN=Dmel\CG1902 PE=1 SV=1	-0.336538		>tr|Q9VIM0|Q9VIM0_DROME GH14278p OS=Drosophila melanogaster OX=7227 GN=38C.55 PE=1 SV=1	-0.133263
>tr|Q7K1M4|Q7K1M4_DROME SD04017p OS=Drosophila melanogaster OX=7227 GN=Dmel\CG1902 PE=1 SV=1	-0.336538		>sp|Q9VRJ2|FITM_DROME Fat storage-inducing transmembrane protein OS=Drosophila melanogaster OX=7227 GN=Fitm PE=1 SV=1	-0.134043
>sp|P42787|CBPD_DROME Carboxypeptidase D OS=Drosophila melanogaster OX=7227 GN=svr PE=1 SV=2	-0.336913		>sp|Q9VRJ2|FITM_DROME Fat storage-inducing transmembrane protein OS=Drosophila melanogaster OX=7227 GN=Fitm PE=1 SV=1	-0.134043
>tr|A0A0B4KF23|A0A0B4KF23_DROME Nipped-B protein OS=Drosophila melanogaster OX=7227 GN=Nipped-B PE=1 SV=1	-0.336944		>sp|Q9VRJ2|FITM_DROME Fat storage-inducing transmembrane protein OS=Drosophila melanogaster OX=7227 GN=Fitm PE=1 SV=1	-0.134043
>tr|Q9VSK4|Q9VSK4_DROME GM13032p OS=Drosophila melanogaster OX=7227 GN=Dmel\CG6983 PE=1 SV=1	-0.337222		>sp|Q9VCJ8|SPE_DROME Spaetzle-processing enzyme OS=Drosophila melanogaster OX=7227 GN=SPE PE=1 SV=2	-0.1345
>tr|Q9VSK4|Q9VSK4_DROME GM13032p OS=Drosophila melanogaster OX=7227 GN=Dmel\CG6983 PE=1 SV=1	-0.337222		>sp|Q9VCJ8|SPE_DROME Spaetzle-processing enzyme OS=Drosophila melanogaster OX=7227 GN=SPE PE=1 SV=2	-0.1345
>tr|Q9VSK4|Q9VSK4_DROME GM13032p OS=Drosophila melanogaster OX=7227 GN=Dmel\CG6983 PE=1 SV=1	-0.337222		>sp|Q9VCJ8|SPE_DROME Spaetzle-processing enzyme OS=Drosophila melanogaster OX=7227 GN=SPE PE=1 SV=2	-0.1345
>tr|A0A0B4LEK8|A0A0B4LEK8_DROME Secretory 24AB, isoform C OS=Drosophila melanogaster OX=7227 GN=Sec24AB PE=1 SV=1	-0.337263		>tr|A1Z9W2|A1Z9W2_DROME RH47216p OS=Drosophila melanogaster OX=7227 GN=CG10220 PE=2 SV=1	-0.134687
>tr|Q9VG32|Q9VG32_DROME Malic enzyme OS=Drosophila melanogaster OX=7227 GN=Men PE=1 SV=1	-0.337418		>tr|A1Z9W2|A1Z9W2_DROME RH47216p OS=Drosophila melanogaster OX=7227 GN=CG10220 PE=2 SV=1	-0.134687
>tr|Q9VG32|Q9VG32_DROME Malic enzyme OS=Drosophila melanogaster OX=7227 GN=Men PE=1 SV=1	-0.337418		>tr|A1Z9W2|A1Z9W2_DROME RH47216p OS=Drosophila melanogaster OX=7227 GN=CG10220 PE=2 SV=1	-0.134687
>tr|Q9VG32|Q9VG32_DROME Malic enzyme OS=Drosophila melanogaster OX=7227 GN=Men PE=1 SV=1	-0.337418		>tr|M9PF96|M9PF96_DROME Peroxisomal membrane protein 70 kDa, isoform C OS=Drosophila melanogaster OX=7227 GN=Pmp70 PE=1 SV=1	-0.134789
>tr|Q9VRD4|Q9VRD4_DROME Uncharacterized protein, isoform A OS=Drosophila melanogaster OX=7227 GN=Dmel\CG1532 PE=1 SV=1	-0.3375		>tr|M9PF96|M9PF96_DROME Peroxisomal membrane protein 70 kDa, isoform C OS=Drosophila melanogaster OX=7227 GN=Pmp70 PE=1 SV=1	-0.134789
>tr|Q9VRD4|Q9VRD4_DROME Uncharacterized protein, isoform A OS=Drosophila melanogaster OX=7227 GN=Dmel\CG1532 PE=1 SV=1	-0.3375		>tr|M9PF96|M9PF96_DROME Peroxisomal membrane protein 70 kDa, isoform C OS=Drosophila melanogaster OX=7227 GN=Pmp70 PE=1 SV=1	-0.134789
>tr|Q7KY08|Q7KY08_DROME Argonaute protein OS=Drosophila melanogaster OX=7227 GN=AGO1 PE=1 SV=1	-0.337684		>tr|Q8MKJ5|Q8MKJ5_DROME GEO08105p1 OS=Drosophila melanogaster OX=7227 GN=Dmel\CG30197 PE=1 SV=1	-0.136283
>tr|Q7KY08|Q7KY08_DROME Argonaute protein OS=Drosophila melanogaster OX=7227 GN=AGO1 PE=1 SV=1	-0.337684		>tr|Q9VQL7|Q9VQL7_DROME Fatty acid synthase 1, isoform A OS=Drosophila melanogaster OX=7227 GN=FASN1 PE=1 SV=1	-0.1363
>tr|X2JCB6|X2JCB6_DROME Uncharacterized protein, isoform C OS=Drosophila melanogaster OX=7227 GN=Dmel\CG2277 PE=1 SV=1	-0.338161		>tr|Q9VQL7|Q9VQL7_DROME Fatty acid synthase 1, isoform A OS=Drosophila melanogaster OX=7227 GN=FASN1 PE=1 SV=1	-0.1363
>tr|X2JCB6|X2JCB6_DROME Uncharacterized protein, isoform C OS=Drosophila melanogaster OX=7227 GN=Dmel\CG2277 PE=1 SV=1	-0.338161		>tr|Q9VQL7|Q9VQL7_DROME Fatty acid synthase 1, isoform A OS=Drosophila melanogaster OX=7227 GN=FASN1 PE=1 SV=1	-0.1363
>tr|Q7KWG9|Q7KWG9_DROME Meiosis regulator and mRNA stability factor 1, isoform D OS=Drosophila melanogaster OX=7227 GN=Marf1 PE=2 SV=1	-0.339004		>tr|Q8STA5|Q8STA5_DROME RH02823p OS=Drosophila melanogaster OX=7227 GN=Dmel\CG2862 PE=1 SV=1	-0.136667
>tr|M9NDM3|M9NDM3_DROME Rhea, isoform C OS=Drosophila melanogaster OX=7227 GN=rhea PE=1 SV=1	-0.339419		>tr|Q8STA5|Q8STA5_DROME RH02823p OS=Drosophila melanogaster OX=7227 GN=HINT1 PE=1 SV=1	-0.136667
>tr|M9NDM3|M9NDM3_DROME Rhea, isoform C OS=Drosophila melanogaster OX=7227 GN=rhea PE=1 SV=1	-0.339419		>tr|Q8STA5|Q8STA5_DROME RH02823p OS=Drosophila melanogaster OX=7227 GN=HINT1 PE=1 SV=1	-0.136667
>tr|M9NDM3|M9NDM3_DROME Rhea, isoform C OS=Drosophila melanogaster OX=7227 GN=rhea PE=1 SV=1	-0.339419		>tr|A0A0B4KEX7|A0A0B4KEX7_DROME Uncharacterized protein OS=Drosophila melanogaster OX=7227 GN=Dmel\CG43788 PE=4 SV=1	-0.137097
>tr|Q9VJQ3|Q9VJQ3_DROME RH54244p OS=Drosophila melanogaster OX=7227 GN=yellow-c PE=1 SV=3	-0.339726		>tr|A0A0B4KEX7|A0A0B4KEX7_DROME Uncharacterized protein OS=Drosophila melanogaster OX=7227 GN=Dmel\CG43788 PE=4 SV=1	-0.137097
>tr|Q9VJQ3|Q9VJQ3_DROME RH54244p OS=Drosophila melanogaster OX=7227 GN=yellow-c PE=1 SV=3	-0.339726		>tr|A0A0B4KEX7|A0A0B4KEX7_DROME Uncharacterized protein OS=Drosophila melanogaster OX=7227 GN=Dmel\CG43788 PE=4 SV=1	-0.137097
>tr|Q9VJQ3|Q9VJQ3_DROME RH54244p OS=Drosophila melanogaster OX=7227 GN=yellow-c PE=1 SV=3	-0.339726		>tr|Q9XZ68|Q9XZ68_DROME Geranylgeranyl transferase type-2 subunit beta OS=Drosophila melanogaster OX=7227 GN=betaggt-II PE=1 SV=1	-0.137176
>sp|Q9V3P6|PSMD1_DROME 26S proteasome non-ATPase regulatory subunit 1 OS=Drosophila melanogaster OX=7227 GN=Rpn2 PE=1 SV=1	-0.34		>tr|A1Z979|A1Z979_DROME Uncharacterized protein OS=Drosophila melanogaster OX=7227 GN=Dmel\CG13324 PE=4 SV=1	-0.1375
>tr|Q5U0V7|Q5U0V7_DROME GH06496p OS=Drosophila melanogaster OX=7227 GN=Synj PE=1 SV=1	-0.340558		>sp|P36951|HYI_DROME Putative hydroxypyruvate isomerase OS=Drosophila melanogaster OX=7227 GN=Gip PE=2 SV=1	-0.1375
>sp|Q7KN62|TERA_DROME Transitional endoplasmic reticulum ATPase TER94 OS=Drosophila melanogaster OX=7227 GN=TER94 PE=1 SV=1	-0.340699		>tr|A0AQH0|A0AQH0_DROME Proteasome subunit beta OS=Drosophila melanogaster OX=7227 GN=Prosbeta1 PE=1 SV=1	-0.1375
>sp|P05389|RLA2_DROME 60S acidic ribosomal protein P2 OS=Drosophila melanogaster OX=7227 GN=RpLP2 PE=1 SV=1	-0.340708		>tr|A0AQH0|A0AQH0_DROME Proteasome subunit beta OS=Drosophila melanogaster OX=7227 GN=Prosbeta1 PE=1 SV=1	-0.1375
>sp|P05389|RLA2_DROME 60S acidic ribosomal protein P2 OS=Drosophila melanogaster OX=7227 GN=RpLP2 PE=1 SV=1	-0.340708		>sp|P36951|HYI_DROME Putative hydroxypyruvate isomerase OS=Drosophila melanogaster OX=7227 GN=Gip PE=2 SV=1	-0.1375
>tr|Q7K148|Q7K148_DROME Proteasome subunit beta OS=Drosophila melanogaster OX=7227 GN=Prosbeta5 PE=1 SV=1	-0.34078		>tr|A0AQH0|A0AQH0_DROME Proteasome subunit beta OS=Drosophila melanogaster OX=7227 GN=Prosbeta1 PE=1 SV=1	-0.1375
>sp|P18053|PSA4_DROME Proteasome subunit alpha type-4 OS=Drosophila melanogaster OX=7227 GN=Prosalpha3 PE=1 SV=2	-0.340909		>sp|P36951|HYI_DROME Putative hydroxypyruvate isomerase OS=Drosophila melanogaster OX=7227 GN=Gip PE=2 SV=1	-0.1375
>tr|Q9VJ86|Q9VJ86_DROME Bicoid stability factor OS=Drosophila melanogaster OX=7227 GN=bsf PE=1 SV=2	-0.341076		>tr|Q9VH26|Q9VH26_DROME Carbonic anhydrase 7, isoform A OS=Drosophila melanogaster OX=7227 GN=CAH7 PE=3 SV=2	-0.137829
>tr|Q9VJ86|Q9VJ86_DROME Bicoid stability factor OS=Drosophila melanogaster OX=7227 GN=bsf PE=1 SV=2	-0.341076		>tr|Q9VH26|Q9VH26_DROME Carbonic anhydrase OS=Drosophila melanogaster OX=7227 GN=CAH7 PE=3 SV=2	-0.137829
>tr|Q9VJ86|Q9VJ86_DROME Bicoid stability factor OS=Drosophila melanogaster OX=7227 GN=bsf PE=1 SV=2	-0.341076		>sp|Q9VUY9|PGM_DROME Phosphoglucomutase OS=Drosophila melanogaster OX=7227 GN=Pgm PE=1 SV=1	-0.137857
>tr|Q9VYR1|Q9VYR1_DROME Regucalcin homologue OS=Drosophila melanogaster OX=7227 GN=regucalcin PE=1 SV=1	-0.341914		>sp|Q9VUY9|PGM_DROME Phosphoglucomutase OS=Drosophila melanogaster OX=7227 GN=Pgm1 PE=1 SV=1	-0.137857
>tr|Q9VYR1|Q9VYR1_DROME Regucalcin homologue OS=Drosophila melanogaster OX=7227 GN=regucalcin PE=1 SV=1	-0.341914		>sp|Q9VUY9|PGM_DROME Phosphoglucomutase OS=Drosophila melanogaster OX=7227 GN=Pgm1 PE=1 SV=1	-0.137857
>tr|Q9VYR1|Q9VYR1_DROME Regucalcin homologue OS=Drosophila melanogaster OX=7227 GN=regucalcin PE=1 SV=1	-0.341914		>tr|Q9VDC6|Q9VDC6_DROME Ebony OS=Drosophila melanogaster OX=7227 GN=e PE=1 SV=1	-0.137998
>sp|O18413|PRS8_DROME 26S proteasome regulatory subunit 8 OS=Drosophila melanogaster OX=7227 GN=Rpt6 PE=1 SV=2	-0.341975		>tr|Q9VDC6|Q9VDC6_DROME Ebony OS=Drosophila melanogaster OX=7227 GN=e PE=1 SV=1	-0.137998
>sp|Q9VP61|ACSA_DROME Acetyl-coenzyme A synthetase OS=Drosophila melanogaster OX=7227 GN=AcCoAS PE=2 SV=1	-0.34209		>tr|Q9VDC6|Q9VDC6_DROME Ebony OS=Drosophila melanogaster OX=7227 GN=e PE=1 SV=1	-0.137998
>sp|Q9VP61|ACSA_DROME Acetyl-coenzyme A synthetase OS=Drosophila melanogaster OX=7227 GN=AcCoAS PE=2 SV=1	-0.34209		>tr|Q9VIH1|Q9VIH1_DROME CG9273 protein OS=Drosophila melanogaster OX=7227 GN=RPA2 PE=1 SV=2	-0.138211
>sp|Q9VP61|ACSA_DROME Acetyl-coenzyme A synthetase OS=Drosophila melanogaster OX=7227 GN=AcCoAS PE=2 SV=1	-0.34209		>sp|Q9VMT5|C28D1_DROME Probable cytochrome P450 28d1 OS=Drosophila melanogaster OX=7227 GN=Cyp28d1 PE=2 SV=1	-0.138446
>tr|E1JHA6|E1JHA6_DROME Uninflatable, isoform C OS=Drosophila melanogaster OX=7227 GN=uif PE=1 SV=1	-0.342101		>sp|Q9VMT5|C28D1_DROME Probable cytochrome P450 28d1 OS=Drosophila melanogaster OX=7227 GN=Cyp28d1 PE=2 SV=1	-0.138446
>tr|E1JHA6|E1JHA6_DROME Uninflatable, isoform C OS=Drosophila melanogaster OX=7227 GN=uif PE=1 SV=1	-0.342101		>sp|Q9VMT5|C28D1_DROME Probable cytochrome P450 28d1 OS=Drosophila melanogaster OX=7227 GN=Cyp28d1 PE=2 SV=1	-0.138446
>tr|E1JHA6|E1JHA6_DROME Uninflatable, isoform C OS=Drosophila melanogaster OX=7227 GN=uif PE=1 SV=1	-0.342101		>tr|Q9VEC2|Q9VEC2_DROME Proteasome assembly chaperone 2 OS=Drosophila melanogaster OX=7227 GN=Dmel\CG12321 PE=1 SV=1	-0.138866
>sp|Q27268|DX39B_DROME ATP-dependent RNA helicase WM6 OS=Drosophila melanogaster OX=7227 GN=Hel25E PE=1 SV=1	-0.342453		>tr|Q9VEC2|Q9VEC2_DROME Proteasome assembly chaperone 2 OS=Drosophila melanogaster OX=7227 GN=Dmel\CG12321 PE=1 SV=1	-0.138866
>sp|Q27268|DX39B_DROME ATP-dependent RNA helicase WM6 OS=Drosophila melanogaster OX=7227 GN=Hel25E PE=1 SV=1	-0.342453		>tr|Q9VEC2|Q9VEC2_DROME Proteasome assembly chaperone 2 OS=Drosophila melanogaster OX=7227 GN=Dmel\CG12321 PE=1 SV=1	-0.138866
>sp|Q27268|DX39B_DROME ATP-dependent RNA helicase WM6 OS=Drosophila melanogaster OX=7227 GN=Hel25E PE=1 SV=1	-0.342453		>tr|A0A0B4KEL0|A0A0B4KEL0_DROME Aldehyde dehydrogenase OS=Drosophila melanogaster OX=7227 GN=Aldh-III PE=1 SV=1	-0.138956
>tr|Q8IMT4|Q8IMT4_DROME CHK domain-containing protein OS=Drosophila melanogaster OX=7227 GN=CG13665 PE=1 SV=1	-0.343692		>tr|A0A0B4KEL0|A0A0B4KEL0_DROME Aldehyde dehydrogenase OS=Drosophila melanogaster OX=7227 GN=Aldh-III PE=1 SV=1	-0.138956
>sp|P25867|UBCD1_DROME Ubiquitin-conjugating enzyme E2-17 kDa OS=Drosophila melanogaster OX=7227 GN=eff PE=2 SV=1	-0.344218		>tr|A0A0B4KEL0|A0A0B4KEL0_DROME Aldehyde dehydrogenase OS=Drosophila melanogaster OX=7227 GN=Aldh-III PE=1 SV=1	-0.138956
>sp|P25867|UBCD1_DROME Ubiquitin-conjugating enzyme E2-17 kDa OS=Drosophila melanogaster OX=7227 GN=eff PE=2 SV=1	-0.344218		>tr|Q8MRI4|Q8MRI4_DROME LD05643p OS=Drosophila melanogaster OX=7227 GN=Dmel\CG1578 PE=1 SV=1	-0.139179
>sp|P25867|UBCD1_DROME Ubiquitin-conjugating enzyme E2-17 kDa OS=Drosophila melanogaster OX=7227 GN=eff PE=2 SV=1	-0.344218		>tr|Q7K5N8|Q7K5N8_DROME GH01592p OS=Drosophila melanogaster OX=7227 GN=BEST:GH19547 PE=1 SV=1	-0.139231
>tr|Q9VQB4|Q9VQB4_DROME LD06553p OS=Drosophila melanogaster OX=7227 GN=Dmel\CG3609 PE=1 SV=1	-0.344478		>tr|Q7K5N8|Q7K5N8_DROME GH01592p OS=Drosophila melanogaster OX=7227 GN=BEST:GH19547 PE=1 SV=1	-0.139231
>tr|Q9VQB4|Q9VQB4_DROME LD06553p OS=Drosophila melanogaster OX=7227 GN=Dmel\CG3609 PE=1 SV=1	-0.344478		>tr|Q7K5N8|Q7K5N8_DROME GH01592p OS=Drosophila melanogaster OX=7227 GN=BEST:GH19547 PE=1 SV=1	-0.139231
>tr|Q9VQB4|Q9VQB4_DROME LD06553p OS=Drosophila melanogaster OX=7227 GN=Dmel\CG3609 PE=1 SV=1	-0.344478		>tr|Q9VVH5|Q9VVH5_DROME AT13736p OS=Drosophila melanogaster OX=7227 GN=UQCR-Q PE=1 SV=1	-0.139326
>sp|Q06559|RS3_DROME 40S ribosomal protein S3 OS=Drosophila melanogaster OX=7227 GN=RpS3 PE=1 SV=1	-0.345528		>tr|Q9VVH5|Q9VVH5_DROME AT13736p OS=Drosophila melanogaster OX=7227 GN=UQCR-Q PE=1 SV=1	-0.139326
>sp|Q06559|RS3_DROME 40S ribosomal protein S3 OS=Drosophila melanogaster OX=7227 GN=RpS3 PE=1 SV=1	-0.345528		>tr|Q9VVH5|Q9VVH5_DROME AT13736p OS=Drosophila melanogaster OX=7227 GN=UQCR-Q PE=1 SV=1	-0.139326
>sp|Q06559|RS3_DROME 40S ribosomal protein S3 OS=Drosophila melanogaster OX=7227 GN=RpS3 PE=1 SV=1	-0.345528		>sp|Q8IN44|TOTA_DROME Protein Turandot A OS=Drosophila melanogaster OX=7227 GN=TotA PE=1 SV=1	-0.139535
>tr|Q7JXC4|Q7JXC4_DROME CG6459 protein OS=Drosophila melanogaster OX=7227 GN=P32 PE=1 SV=1	-0.345627		>sp|Q8IN44|TOTA_DROME Protein Turandot A OS=Drosophila melanogaster OX=7227 GN=TotA PE=1 SV=1	-0.139535
>tr|Q7JXC4|Q7JXC4_DROME CG6459 protein OS=Drosophila melanogaster OX=7227 GN=P32 PE=1 SV=1	-0.345627		>sp|P16914|ELAV_DROME Protein elav OS=Drosophila melanogaster OX=7227 GN=elav PE=2 SV=1	-0.139752
>tr|Q7JXC4|Q7JXC4_DROME CG6459 protein OS=Drosophila melanogaster OX=7227 GN=P32 PE=1 SV=1	-0.345627		>sp|P16914|ELAV_DROME Protein elav OS=Drosophila melanogaster OX=7227 GN=elav PE=2 SV=1	-0.139752
>tr|A1Z8K9|A1Z8K9_DROME Superoxide dismutase [Cu-Zn] OS=Drosophila melanogaster OX=7227 GN=Sod3 PE=1 SV=1	-0.345679		>sp|P16914|ELAV_DROME Protein elav OS=Drosophila melanogaster OX=7227 GN=elav PE=2 SV=1	-0.139752
>tr|A1Z8K9|A1Z8K9_DROME Superoxide dismutase [Cu-Zn] OS=Drosophila melanogaster OX=7227 GN=Sod3 PE=1 SV=1	-0.345679		>sp|Q08694|LYSB_DROME Lysozyme B OS=Drosophila melanogaster OX=7227 GN=LysB PE=2 SV=2	-0.14
>tr|Q9W298|Q9W298_DROME LD38241p OS=Drosophila melanogaster OX=7227 GN=Dmel\CG2921 PE=2 SV=1	-0.346234		>sp|Q08694|LYSB_DROME Lysozyme B OS=Drosophila melanogaster OX=7227 GN=LysB PE=2 SV=2	-0.14
>sp|Q9V3K3|RUVB2_DROME RuvB-like helicase 2 OS=Drosophila melanogaster OX=7227 GN=rept PE=1 SV=1	-0.346362		>sp|Q08694|LYSB_DROME Lysozyme B OS=Drosophila melanogaster OX=7227 GN=LysB PE=2 SV=2	-0.14
>tr|Q9VW19|Q9VW19_DROME RE17417p OS=Drosophila melanogaster OX=7227 GN=Dmel\CG9372 PE=1 SV=1	-0.346569		>tr|Q8MM39|Q8MM39_DROME RE31022p OS=Drosophila melanogaster OX=7227 GN=Spn42Da PE=1 SV=1	-0.140369
>tr|Q9VBI2|Q9VBI2_DROME UMP-CMP kinase OS=Drosophila melanogaster OX=7227 GN=Dak1 PE=1 SV=1	-0.34664		>tr|Q8MM39|Q8MM39_DROME RE31022p OS=Drosophila melanogaster OX=7227 GN=Spn42Da PE=1 SV=1	-0.140369
>tr|Q9VBI2|Q9VBI2_DROME UMP-CMP kinase OS=Drosophila melanogaster OX=7227 GN=Dak1 PE=1 SV=1	-0.34664		>tr|Q7K2E1|Q7K2E1_DROME LD05247p OS=Drosophila melanogaster OX=7227 GN=Dmel\CG8839 PE=1 SV=1	-0.140832
>tr|Q9VBI2|Q9VBI2_DROME UMP-CMP kinase OS=Drosophila melanogaster OX=7227 GN=Dak1 PE=1 SV=1	-0.34664		>tr|Q7K2E1|Q7K2E1_DROME LD05247p OS=Drosophila melanogaster OX=7227 GN=Dmel\CG8839 PE=1 SV=1	-0.140832
>sp|P29845|HSP7E_DROME Heat shock 70 kDa protein cognate 5 OS=Drosophila melanogaster OX=7227 GN=Hsc70-5 PE=1 SV=2	-0.346793		>tr|Q7K2E1|Q7K2E1_DROME LD05247p OS=Drosophila melanogaster OX=7227 GN=Dmel\CG8839 PE=1 SV=1	-0.140832
>sp|P29845|HSP7E_DROME Heat shock 70 kDa protein cognate 5 OS=Drosophila melanogaster OX=7227 GN=Hsc70-5 PE=1 SV=2	-0.346793		>sp|Q04448|MTDC_DROME Bifunctional methylenetetrahydrofolate dehydrogenase/cyclohydrolase, mitochondrial OS=Drosophila melanogaster OX=7227 GN=Nmdmc PE=2 SV=2	-0.141424
>sp|P29845|HSP7E_DROME Heat shock 70 kDa protein cognate 5 OS=Drosophila melanogaster OX=7227 GN=Hsc70-5 PE=1 SV=2	-0.346793		>sp|Q9VZ64|6PGL_DROME Probable 6-phosphogluconolactonase OS=Drosophila melanogaster OX=7227 GN=CG17333 PE=2 SV=1	-0.141564
>tr|Q9VLB7|Q9VLB7_DROME Rab GDP dissociation inhibitor OS=Drosophila melanogaster OX=7227 GN=Gdi PE=1 SV=1	-0.347404		>sp|Q9VZ64|6PGL_DROME Probable 6-phosphogluconolactonase OS=Drosophila melanogaster OX=7227 GN=CG17333 PE=2 SV=1	-0.141564
>tr|Q9VLB7|Q9VLB7_DROME Rab GDP dissociation inhibitor OS=Drosophila melanogaster OX=7227 GN=Gdi PE=1 SV=1	-0.347404		>sp|Q9VZ64|6PGL_DROME Probable 6-phosphogluconolactonase OS=Drosophila melanogaster OX=7227 GN=CG17333 PE=2 SV=1	-0.141564
>tr|Q9VLB7|Q9VLB7_DROME Rab GDP dissociation inhibitor OS=Drosophila melanogaster OX=7227 GN=Gdi PE=1 SV=1	-0.347404		>sp|Q9V7Y2|SGPL_DROME Sphingosine-1-phosphate lyase OS=Drosophila melanogaster OX=7227 GN=Sply PE=1 SV=1	-0.141835
>tr|Q9VK60|Q9VK60_DROME GH25425p OS=Drosophila melanogaster OX=7227 GN=Dmel\CG6180 PE=1 SV=2	-0.347471		>sp|Q9V7Y2|SGPL_DROME Sphingosine-1-phosphate lyase OS=Drosophila melanogaster OX=7227 GN=Sply PE=1 SV=1	-0.141835
>tr|Q9VK60|Q9VK60_DROME GH25425p OS=Drosophila melanogaster OX=7227 GN=Dmel\CG6180 PE=1 SV=2	-0.347471		>sp|Q9V7Y2|SGPL_DROME Sphingosine-1-phosphate lyase OS=Drosophila melanogaster OX=7227 GN=Sply PE=1 SV=1	-0.141835
>sp|Q05856|RSMB_DROME Small nuclear ribonucleoprotein-associated protein B OS=Drosophila melanogaster OX=7227 GN=SmB PE=1 SV=1	-0.347739		>sp|Q9V419|C28A5_DROME Probable cytochrome P450 28a5 OS=Drosophila melanogaster OX=7227 GN=Cyp28a5 PE=2 SV=1	-0.14198
>tr|Q8I099|Q8I099_DROME Uncharacterized protein, isoform A OS=Drosophila melanogaster OX=7227 GN=Dmel\CG2663 PE=4 SV=2	-0.348377		>sp|Q9V419|C28A5_DROME Probable cytochrome P450 28a5 OS=Drosophila melanogaster OX=7227 GN=Cyp28a5 PE=2 SV=1	-0.14198
>tr|A0A0B4KHN1|A0A0B4KHN1_DROME Cheerio, isoform N OS=Drosophila melanogaster OX=7227 GN=cher PE=1 SV=1	-0.348378		>sp|Q9V419|C28A5_DROME Probable cytochrome P450 28a5 OS=Drosophila melanogaster OX=7227 GN=Cyp28a5 PE=2 SV=1	-0.14198
>tr|A0A0B4KHN1|A0A0B4KHN1_DROME Cheerio, isoform N OS=Drosophila melanogaster OX=7227 GN=cher PE=1 SV=1	-0.348378		>tr|Q9VXY3|Q9VXY3_DROME Dihydrolipoamide acetyltransferase component of pyruvate dehydrogenase complex OS=Drosophila melanogaster OX=7227 GN=Dmel\CG5599 PE=1 SV=1	-0.142208
>tr|A0A0B4KHN1|A0A0B4KHN1_DROME Cheerio, isoform N OS=Drosophila melanogaster OX=7227 GN=cher PE=1 SV=1	-0.348378		>tr|Q9VXY3|Q9VXY3_DROME Dihydrolipoamide acetyltransferase component of pyruvate dehydrogenase complex OS=Drosophila melanogaster OX=7227 GN=Dmel\CG5599 PE=1 SV=1	-0.142208
>tr|Q9VCI4|Q9VCI4_DROME LD32918p OS=Drosophila melanogaster OX=7227 GN=udt PE=2 SV=2	-0.349111		>tr|Q9VXY3|Q9VXY3_DROME Dihydrolipoamide acetyltransferase component of pyruvate dehydrogenase complex OS=Drosophila melanogaster OX=7227 GN=Dmel\CG5599 PE=1 SV=1	-0.142208
>tr|Q9VMB9|Q9VMB9_DROME Cytochrome c oxidase subunit 5B, isoform A OS=Drosophila melanogaster OX=7227 GN=COX5B PE=1 SV=1	-0.349167		>tr|Q9VY92|Q9VY92_DROME GEO07753p1 OS=Drosophila melanogaster OX=7227 GN=Dmel\CG11151 PE=1 SV=1	-0.142609
>tr|Q9VMB9|Q9VMB9_DROME Cytochrome c oxidase subunit 5B, isoform A OS=Drosophila melanogaster OX=7227 GN=COX5B PE=1 SV=1	-0.349167		>tr|Q9VY92|Q9VY92_DROME GEO07753p1 OS=Drosophila melanogaster OX=7227 GN=Dmel\CG11151 PE=1 SV=1	-0.142609
>tr|Q9VMB9|Q9VMB9_DROME Cytochrome c oxidase subunit 5B, isoform A OS=Drosophila melanogaster OX=7227 GN=COX5B PE=1 SV=1	-0.349167		>tr|Q9VY92|Q9VY92_DROME GEO07753p1 OS=Drosophila melanogaster OX=7227 GN=Dmel\CG11151 PE=1 SV=1	-0.142609
>tr|Q9W1Q8|Q9W1Q8_DROME Eukaryotic translation initiation factor 2B subunit delta, isoform A OS=Drosophila melanogaster OX=7227 GN=eIF2Bdelta PE=1 SV=1	-0.350479		>tr|Q9VL68|Q9VL68_DROME RH73277p OS=Drosophila melanogaster OX=7227 GN=Dmel\CG4598 PE=1 SV=2	-0.142705
>tr|Q9W1Q8|Q9W1Q8_DROME Eukaryotic translation initiation factor 2B subunit delta, isoform A OS=Drosophila melanogaster OX=7227 GN=eIF2Bdelta PE=1 SV=1	-0.350479		>tr|Q9VL68|Q9VL68_DROME RH73277p OS=Drosophila melanogaster OX=7227 GN=Dmel\CG4598 PE=1 SV=2	-0.142705
>sp|Q9V3G7|PSMD6_DROME 26S proteasome non-ATPase regulatory subunit 6 OS=Drosophila melanogaster OX=7227 GN=Rpn7 PE=2 SV=1	-0.350643		>tr|Q9VL68|Q9VL68_DROME RH73277p OS=Drosophila melanogaster OX=7227 GN=Dmel\CG4598 PE=1 SV=2	-0.142705
>tr|Q9VGW7|Q9VGW7_DROME Arginine methyltransferase 1 OS=Drosophila melanogaster OX=7227 GN=Art1 PE=1 SV=1	-0.35133		>tr|A0A0B4LI06|A0A0B4LI06_DROME Pasilla, isoform T OS=Drosophila melanogaster OX=7227 GN=ps PE=1 SV=1	-0.143019
>tr|Q9VGW7|Q9VGW7_DROME Arginine methyltransferase 1 OS=Drosophila melanogaster OX=7227 GN=Art1 PE=1 SV=1	-0.35133		>tr|A0A0B4KF65|A0A0B4KF65_DROME Elongation of very long chain fatty acids protein OS=Drosophila melanogaster OX=7227 GN=BcDNA:GH22993 PE=1 SV=1	-0.143622
>sp|P54385|DHE3_DROME Glutamate dehydrogenase, mitochondrial OS=Drosophila melanogaster OX=7227 GN=Gdh PE=1 SV=2	-0.351423		>tr|Q7KUD4|Q7KUD4_DROME Calcium-independent phospholipase A2 VIA, isoform B OS=Drosophila melanogaster OX=7227 GN=iPLA2-VIA PE=1 SV=1	-0.14363
>sp|P54385|DHE3_DROME Glutamate dehydrogenase, mitochondrial OS=Drosophila melanogaster OX=7227 GN=Gdh PE=1 SV=2	-0.351423		>tr|Q9VJZ6|Q9VJZ6_DROME LD40224p OS=Drosophila melanogaster OX=7227 GN=Grx4 PE=1 SV=1	-0.143981
>sp|P54385|DHE3_DROME Glutamate dehydrogenase, mitochondrial OS=Drosophila melanogaster OX=7227 GN=Gdh PE=1 SV=2	-0.351423		>tr|Q9VJZ6|Q9VJZ6_DROME LD40224p OS=Drosophila melanogaster OX=7227 GN=Grx4 PE=1 SV=1	-0.143981
>tr|Q9VC19|Q9VC19_DROME Uncharacterized protein, isoform D OS=Drosophila melanogaster OX=7227 GN=Dmel\CG3744 PE=3 SV=3	-0.351452		>tr|Q9VJZ6|Q9VJZ6_DROME LD40224p OS=Drosophila melanogaster OX=7227 GN=Grx4 PE=1 SV=1	-0.143981
>tr|Q9VHE4|Q9VHE4_DROME LD31229p OS=Drosophila melanogaster OX=7227 GN=Dmel\CG8132 PE=1 SV=1	-0.351943		>tr|Q9VYG8|Q9VYG8_DROME CG15717-PA OS=Drosophila melanogaster OX=7227 GN=Dmel\CG15717 PE=1 SV=1	-0.144048
>tr|Q9VHE4|Q9VHE4_DROME LD31229p OS=Drosophila melanogaster OX=7227 GN=Dmel\CG8132 PE=1 SV=1	-0.351943		>tr|Q9VZW1|Q9VZW1_DROME Phospholipid scramblase OS=Drosophila melanogaster OX=7227 GN=scramb2 PE=1 SV=1	-0.144106
>tr|Q9VHE4|Q9VHE4_DROME LD31229p OS=Drosophila melanogaster OX=7227 GN=Dmel\CG8132 PE=1 SV=1	-0.351943		>tr|Q9VZW1|Q9VZW1_DROME Phospholipid scramblase OS=Drosophila melanogaster OX=7227 GN=scramb2 PE=1 SV=1	-0.144106
>tr|Q9W2H8|Q9W2H8_DROME Uncharacterized protein, isoform B OS=Drosophila melanogaster OX=7227 GN=BEST:GH22856 PE=1 SV=3	-0.352363		>tr|Q9VXH4|Q9VXH4_DROME RE16337p OS=Drosophila melanogaster OX=7227 GN=Dmel\CG9921 PE=1 SV=1	-0.144118
>tr|Q9W2H8|Q9W2H8_DROME Uncharacterized protein, isoform B OS=Drosophila melanogaster OX=7227 GN=BEST:GH22856 PE=1 SV=3	-0.352363		>sp|A1Z8N1|TRE11_DROME Facilitated trehalose transporter Tret1-1 OS=Drosophila melanogaster OX=7227 GN=Tret1-1 PE=1 SV=1	-0.144924
>tr|Q9W2H8|Q9W2H8_DROME Uncharacterized protein, isoform B OS=Drosophila melanogaster OX=7227 GN=BEST:GH22856 PE=1 SV=3	-0.352363		>sp|A1Z8N1|TRE11_DROME Facilitated trehalose transporter Tret1-1 OS=Drosophila melanogaster OX=7227 GN=Tret1-1 PE=1 SV=1	-0.144924
>tr|Q9V9W4|Q9V9W4_DROME GH08048p OS=Drosophila melanogaster OX=7227 GN=Dmel\CG1774 PE=1 SV=1	-0.352754		>sp|A1Z8N1|TRE11_DROME Facilitated trehalose transporter Tret1-1 OS=Drosophila melanogaster OX=7227 GN=Tret1-1 PE=1 SV=1	-0.144924
>tr|Q9VJ80|Q9VJ80_DROME LD42267p OS=Drosophila melanogaster OX=7227 GN=Dmel\CG10211 PE=1 SV=3	-0.352798		>tr|Q9VIJ0|Q9VIJ0_DROME Uncharacterized protein, isoform A OS=Drosophila melanogaster OX=7227 GN=Dmel\CG9331 PE=1 SV=3	-0.145055
>tr|Q9VCN3|Q9VCN3_DROME Glutamate dehydrogenase OS=Drosophila melanogaster OX=7227 GN=bb8 PE=1 SV=2	-0.352897		>tr|Q9VIJ0|Q9VIJ0_DROME Uncharacterized protein, isoform A OS=Drosophila melanogaster OX=7227 GN=Dmel\CG9331 PE=1 SV=3	-0.145055
>tr|A8JV22|A8JV22_DROME Bleomycin hydrolase OS=Drosophila melanogaster OX=7227 GN=Dmel\CG1440 PE=1 SV=1	-0.35362		>tr|Q9VIJ0|Q9VIJ0_DROME Uncharacterized protein, isoform A OS=Drosophila melanogaster OX=7227 GN=Dmel\CG9331 PE=1 SV=3	-0.145055
>tr|A8JV22|A8JV22_DROME Bleomycin hydrolase OS=Drosophila melanogaster OX=7227 GN=Dmel\CG1440 PE=1 SV=1	-0.35362		>tr|Q9VQI8|Q9VQI8_DROME FI18627p1 OS=Drosophila melanogaster OX=7227 GN=NTPase PE=1 SV=1	-0.145259
>tr|Q9VLT3|Q9VLT3_DROME LD23292p OS=Drosophila melanogaster OX=7227 GN=Mcr PE=1 SV=1	-0.354773		>tr|Q9VQI8|Q9VQI8_DROME FI18627p1 OS=Drosophila melanogaster OX=7227 GN=NTPase PE=1 SV=1	-0.145259
>tr|Q9VLT3|Q9VLT3_DROME LD23292p OS=Drosophila melanogaster OX=7227 GN=Mcr PE=1 SV=1	-0.354773		>sp|O77277|TORS_DROME Torsin-like protein OS=Drosophila melanogaster OX=7227 GN=Torsin PE=2 SV=2	-0.145294
>tr|Q9VLT3|Q9VLT3_DROME LD23292p OS=Drosophila melanogaster OX=7227 GN=Mcr PE=1 SV=1	-0.354773		>tr|Q8SXQ1|Q8SXQ1_DROME Aldehyde dehydrogenase 7 family member A1 OS=Drosophila melanogaster OX=7227 GN=Aldh7A1 PE=1 SV=1	-0.14537
>tr|Q9W414|Q9W414_DROME Regulatory particle triple-A ATPase 4 OS=Drosophila melanogaster OX=7227 GN=Rpt4 PE=1 SV=3	-0.354912		>tr|Q8SXQ1|Q8SXQ1_DROME Aldehyde dehydrogenase 7 family member A1 OS=Drosophila melanogaster OX=7227 GN=Aldh7A1 PE=1 SV=1	-0.14537
>tr|Q9W414|Q9W414_DROME Regulatory particle triple-A ATPase 4 OS=Drosophila melanogaster OX=7227 GN=Rpt4 PE=1 SV=3	-0.354912		>tr|Q8SXQ1|Q8SXQ1_DROME Aldehyde dehydrogenase 7 family member A1 OS=Drosophila melanogaster OX=7227 GN=Aldh7A1 PE=1 SV=1	-0.14537
>tr|Q9VRR3|Q9VRR3_DROME Uncharacterized protein, isoform A OS=Drosophila melanogaster OX=7227 GN=CG10727 PE=1 SV=2	-0.355187		>sp|Q8SYG2|CSN3_DROME COP9 signalosome complex subunit 3 OS=Drosophila melanogaster OX=7227 GN=CSN3 PE=2 SV=2	-0.145618
>tr|Q9VV00|Q9VV00_DROME Folate gamma-glutamyl hydrolase OS=Drosophila melanogaster OX=7227 GN=l(3)72Dr PE=2 SV=2	-0.355362		>sp|Q8SYG2|CSN3_DROME COP9 signalosome complex subunit 3 OS=Drosophila melanogaster OX=7227 GN=CSN3 PE=2 SV=2	-0.145618
>sp|Q9VYV3|TXND5_DROME Thioredoxin domain-containing protein 5 homolog OS=Drosophila melanogaster OX=7227 GN=prtp PE=1 SV=2	-0.355769		>tr|Q7JR58|Q7JR58_DROME Enoyl-CoA hydratase, short chain 1, isoform A OS=Drosophila melanogaster OX=7227 GN=Echs1 PE=1 SV=1	-0.145763
>sp|Q9VYV3|TXND5_DROME Thioredoxin domain-containing protein 5 homolog OS=Drosophila melanogaster OX=7227 GN=prtp PE=1 SV=2	-0.355769		>tr|Q7JR58|Q7JR58_DROME Enoyl-CoA hydratase, short chain 1, isoform A OS=Drosophila melanogaster OX=7227 GN=Echs1 PE=1 SV=1	-0.145763
>sp|Q9VYV3|TXND5_DROME Thioredoxin domain-containing protein 5 homolog OS=Drosophila melanogaster OX=7227 GN=prtp PE=1 SV=2	-0.355769		>tr|Q7JR58|Q7JR58_DROME Enoyl-CoA hydratase, short chain 1, isoform A OS=Drosophila melanogaster OX=7227 GN=Echs1 PE=1 SV=1	-0.145763
>tr|Q7JVX3|Q7JVX3_DROME LD41739p OS=Drosophila melanogaster OX=7227 GN=BEST:GH09055 PE=1 SV=1	-0.355889		>sp|Q27594|CP6A9_DROME Cytochrome P450 6a9 OS=Drosophila melanogaster OX=7227 GN=Cyp6a9 PE=2 SV=3	-0.146429
>tr|Q7JVX3|Q7JVX3_DROME LD41739p OS=Drosophila melanogaster OX=7227 GN=BEST:GH09055 PE=1 SV=1	-0.355889		>tr|Q9VAC1|Q9VAC1_DROME GM14349p OS=Drosophila melanogaster OX=7227 GN=anon-WO0153538.36 PE=1 SV=1	-0.147589
>tr|Q8IQF8|Q8IQF8_DROME AT18092p OS=Drosophila melanogaster OX=7227 GN=Akr1B PE=1 SV=1	-0.357714		>tr|Q9VAC1|Q9VAC1_DROME GM14349p OS=Drosophila melanogaster OX=7227 GN=anon-WO0153538.36 PE=1 SV=1	-0.147589
>tr|Q9VKW1|Q9VKW1_DROME LD41958p OS=Drosophila melanogaster OX=7227 GN=Wdfy2 PE=1 SV=1	-0.358088		>tr|Q9VAC1|Q9VAC1_DROME GM14349p OS=Drosophila melanogaster OX=7227 GN=anon-WO0153538.36 PE=1 SV=1	-0.147589
>tr|Q9VKW1|Q9VKW1_DROME LD41958p OS=Drosophila melanogaster OX=7227 GN=Wdfy2 PE=1 SV=1	-0.358088		>tr|Q9VBC5|Q9VBC5_DROME FI18833p1 OS=Drosophila melanogaster OX=7227 GN=Yif1 PE=1 SV=1	-0.147607
>tr|Q9VKW1|Q9VKW1_DROME LD41958p OS=Drosophila melanogaster OX=7227 GN=Wdfy2 PE=1 SV=1	-0.358088		>tr|Q9VBC5|Q9VBC5_DROME FI18833p1 OS=Drosophila melanogaster OX=7227 GN=Yif1 PE=1 SV=1	-0.147607
>tr|Q9VY87|Q9VY87_DROME Cathepsin B1, isoform A OS=Drosophila melanogaster OX=7227 GN=CtsB1 PE=1 SV=1	-0.358235		>tr|Q9VBC5|Q9VBC5_DROME FI18833p1 OS=Drosophila melanogaster OX=7227 GN=Yif1 PE=1 SV=1	-0.147607
>tr|Q9VY87|Q9VY87_DROME Cathepsin B1, isoform A OS=Drosophila melanogaster OX=7227 GN=CtsB1 PE=1 SV=1	-0.358235		>tr|Q7JYW9|Q7JYW9_DROME Phosphotransferase OS=Drosophila melanogaster OX=7227 GN=Hex-C PE=1 SV=1	-0.147797
>tr|Q9VHX2|Q9VHX2_DROME GH08043p OS=Drosophila melanogaster OX=7227 GN=Dmel\CG3223 PE=1 SV=1	-0.359277		>tr|Q7JYW9|Q7JYW9_DROME Phosphotransferase OS=Drosophila melanogaster OX=7227 GN=Hex-C PE=1 SV=1	-0.147797
>tr|Q9VAX7|Q9VAX7_DROME Tubulin beta chain OS=Drosophila melanogaster OX=7227 GN=betaTub97EF PE=1 SV=3	-0.359737		>tr|Q7JYW9|Q7JYW9_DROME Phosphotransferase OS=Drosophila melanogaster OX=7227 GN=Hex-C PE=1 SV=1	-0.147797
>tr|Q9VAX7|Q9VAX7_DROME Tubulin beta chain OS=Drosophila melanogaster OX=7227 GN=betaTub97EF PE=1 SV=3	-0.359737		>tr|Q9VMH9|Q9VMH9_DROME Uncharacterized protein OS=Drosophila melanogaster OX=7227 GN=Dmel\CG9150 PE=3 SV=2	-0.147809
>tr|Q9VAX7|Q9VAX7_DROME Tubulin beta chain OS=Drosophila melanogaster OX=7227 GN=betaTub97EF PE=1 SV=3	-0.359737		>tr|Q9VMH9|Q9VMH9_DROME Uncharacterized protein OS=Drosophila melanogaster OX=7227 GN=Dmel\CG9150 PE=3 SV=2	-0.147809
>sp|Q9GU68|IF5A_DROME Eukaryotic translation initiation factor 5A OS=Drosophila melanogaster OX=7227 GN=eEF5 PE=2 SV=2	-0.359748		>tr|Q9VMH9|Q9VMH9_DROME Uncharacterized protein OS=Drosophila melanogaster OX=7227 GN=Dmel\CG9150 PE=3 SV=2	-0.147809
>sp|P61857|TBB2_DROME Tubulin beta-2 chain OS=Drosophila melanogaster OX=7227 GN=betaTub85D PE=1 SV=1	-0.360314		>tr|Q7KVL7|Q7KVL7_DROME Vacuolar protein sorting-associated protein 35 OS=Drosophila melanogaster OX=7227 GN=Vps35 PE=1 SV=2	-0.147821
>sp|P61857|TBB2_DROME Tubulin beta-2 chain OS=Drosophila melanogaster OX=7227 GN=betaTub85D PE=1 SV=1	-0.360314		>tr|Q7KVL7|Q7KVL7_DROME Vacuolar protein sorting-associated protein 35 OS=Drosophila melanogaster OX=7227 GN=Vps35 PE=1 SV=2	-0.147821
>sp|P61857|TBB2_DROME Tubulin beta-2 chain OS=Drosophila melanogaster OX=7227 GN=betaTub85D PE=1 SV=1	-0.360314		>tr|Q7KVL7|Q7KVL7_DROME Vacuolar protein sorting-associated protein 35 OS=Drosophila melanogaster OX=7227 GN=Vps35 PE=1 SV=2	-0.147821
>sp|Q9VKK1|EDC4_DROME Enhancer of mRNA-decapping protein 4 homolog OS=Drosophila melanogaster OX=7227 GN=Ge-1 PE=1 SV=2	-0.36034		>sp|Q9W1X4|NU214_DROME Nuclear pore complex protein Nup214 OS=Drosophila melanogaster OX=7227 GN=Nup214 PE=1 SV=2	-0.147867
>tr|A0A0B4LGH1|A0A0B4LGH1_DROME Tubulin beta chain OS=Drosophila melanogaster OX=7227 GN=betaTub60D PE=1 SV=1	-0.360486		>tr|Q9VVT8|Q9VVT8_DROME LD09909p OS=Drosophila melanogaster OX=7227 GN=ACSL1 PE=1 SV=1	-0.147869
>tr|A0A0B4LGH1|A0A0B4LGH1_DROME Tubulin beta chain OS=Drosophila melanogaster OX=7227 GN=betaTub60D PE=1 SV=1	-0.360486		>tr|Q9VVT8|Q9VVT8_DROME LD09909p OS=Drosophila melanogaster OX=7227 GN=ACSL1 PE=1 SV=1	-0.147869
>tr|X2JD70|X2JD70_DROME Troponin C at 25D, isoform B OS=Drosophila melanogaster OX=7227 GN=TpnC25D PE=1 SV=1	-0.361538		>tr|Q9VD14|Q9VD14_DROME GH07286p OS=Drosophila melanogaster OX=7227 GN=Dmel\CG13850 PE=1 SV=3	-0.148404
>tr|X2JD70|X2JD70_DROME Troponin C at 25D, isoform B OS=Drosophila melanogaster OX=7227 GN=TpnC25D PE=1 SV=1	-0.361538		>tr|Q9VD14|Q9VD14_DROME GH07286p OS=Drosophila melanogaster OX=7227 GN=Dmel\CG13850 PE=1 SV=3	-0.148404
>tr|Q7K1W5|Q7K1W5_DROME LD35843p OS=Drosophila melanogaster OX=7227 GN=Dmel\CG8187 PE=1 SV=1	-0.361702		>tr|Q9VD14|Q9VD14_DROME GH07286p OS=Drosophila melanogaster OX=7227 GN=Dmel\CG13850 PE=1 SV=3	-0.148404
>tr|Q7K1W5|Q7K1W5_DROME LD35843p OS=Drosophila melanogaster OX=7227 GN=Dmel\CG8187 PE=1 SV=1	-0.361702		>sp|Q8T6B9|PUF68_DROME Poly(U)-binding-splicing factor half pint OS=Drosophila melanogaster OX=7227 GN=hfp PE=1 SV=2	-0.148509
>tr|Q9W3D8|Q9W3D8_DROME AT17652p OS=Drosophila melanogaster OX=7227 GN=Dmel\CG12111 PE=2 SV=1	-0.361702		>sp|Q8T6B9|PUF68_DROME Poly(U)-binding-splicing factor half pint OS=Drosophila melanogaster OX=7227 GN=hfp PE=1 SV=2	-0.148509
>sp|Q9VA91|RS7_DROME 40S ribosomal protein S7 OS=Drosophila melanogaster OX=7227 GN=RpS7 PE=1 SV=1	-0.361856		>sp|Q8T6B9|PUF68_DROME Poly(U)-binding-splicing factor half pint OS=Drosophila melanogaster OX=7227 GN=hfp PE=1 SV=2	-0.148509
>sp|Q9VA91|RS7_DROME 40S ribosomal protein S7 OS=Drosophila melanogaster OX=7227 GN=RpS7 PE=1 SV=1	-0.361856		>tr|Q9W247|Q9W247_DROME FI03324p OS=Drosophila melanogaster OX=7227 GN=Dmel\CG4752 PE=1 SV=2	-0.148609
>tr|Q9VBA0|Q9VBA0_DROME GH09623p OS=Drosophila melanogaster OX=7227 GN=Dmel\CG6330 PE=1 SV=2	-0.361957		>tr|Q9W247|Q9W247_DROME FI03324p OS=Drosophila melanogaster OX=7227 GN=Dmel\CG4752 PE=1 SV=2	-0.148609
>tr|Q9VBA0|Q9VBA0_DROME GH09623p OS=Drosophila melanogaster OX=7227 GN=Dmel\CG6330 PE=1 SV=2	-0.361957		>tr|Q9W247|Q9W247_DROME FI03324p OS=Drosophila melanogaster OX=7227 GN=Dmel\CG4752 PE=1 SV=2	-0.148609
>tr|Q9VBA0|Q9VBA0_DROME GH09623p OS=Drosophila melanogaster OX=7227 GN=Dmel\CG6330 PE=1 SV=2	-0.361957		>tr|Q9VJ11|Q9VJ11_DROME Calcium load-activated calcium channel OS=Drosophila melanogaster OX=7227 GN=anon-37B-2 PE=1 SV=1	-0.148634
>tr|Q9W4Y1|Q9W4Y1_DROME Arylalkylamine N-acetyltransferase-like 7, isoform A OS=Drosophila melanogaster OX=7227 GN=AANATL7 PE=2 SV=2	-0.362281		>tr|Q9VJ11|Q9VJ11_DROME Calcium load-activated calcium channel OS=Drosophila melanogaster OX=7227 GN=anon-37B-2 PE=1 SV=1	-0.148634
>tr|Q9VWH7|Q9VWH7_DROME 6-phosphofructo 2-kinase/fructose 2,6-bisphosphatase long form OS=Drosophila melanogaster OX=7227 GN=Pfrx PE=1 SV=2	-0.36257		>tr|Q9VJ11|Q9VJ11_DROME Calcium load-activated calcium channel OS=Drosophila melanogaster OX=7227 GN=anon-37B-2 PE=1 SV=1	-0.148634
>tr|M9PDB7|M9PDB7_DROME Uncharacterized protein, isoform B OS=Drosophila melanogaster OX=7227 GN=Dmel\CG14450 PE=4 SV=1	-0.362903		>tr|Q9VJJ0|Q9VJJ0_DROME Proteasome subunit beta OS=Drosophila melanogaster OX=7227 GN=Prosbeta4 PE=1 SV=1	-0.148756
>sp|O61443|MK38B_DROME Mitogen-activated protein kinase p38b OS=Drosophila melanogaster OX=7227 GN=p38b PE=1 SV=1	-0.363288		>tr|Q9VJJ0|Q9VJJ0_DROME Proteasome subunit beta OS=Drosophila melanogaster OX=7227 GN=Prosbeta4 PE=1 SV=1	-0.148756
>sp|O61443|MK38B_DROME Mitogen-activated protein kinase p38b OS=Drosophila melanogaster OX=7227 GN=p38b PE=1 SV=1	-0.363288		>tr|Q9VJJ0|Q9VJJ0_DROME Proteasome subunit beta OS=Drosophila melanogaster OX=7227 GN=Prosbeta4 PE=1 SV=1	-0.148756
>sp|Q9VAI6|OB99B_DROME General odorant-binding protein 99b OS=Drosophila melanogaster OX=7227 GN=Obp99b PE=2 SV=1	-0.363758		>tr|Q7KRU0|Q7KRU0_DROME Uncharacterized protein, isoform C OS=Drosophila melanogaster OX=7227 GN=Dmel\CG2246 PE=1 SV=1	-0.148964
>sp|Q9VAI6|OB99B_DROME General odorant-binding protein 99b OS=Drosophila melanogaster OX=7227 GN=Obp99b PE=2 SV=1	-0.363758		>tr|Q9V9W7|Q9V9W7_DROME Rough deal OS=Drosophila melanogaster OX=7227 GN=rod PE=1 SV=2	-0.148971
>sp|Q9VAI6|OB99B_DROME General odorant-binding protein 99b OS=Drosophila melanogaster OX=7227 GN=Obp99b PE=2 SV=1	-0.363758		>sp|P25843|PROF_DROME Profilin OS=Drosophila melanogaster OX=7227 GN=chic PE=1 SV=1	-0.149206
>tr|Q9VX36|Q9VX36_DROME NADH dehydrogenase (Ubiquinone) 24 kDa subunit, isoform A OS=Drosophila melanogaster OX=7227 GN=ND-24 PE=1 SV=1	-0.365289		>sp|P25843|PROF_DROME Profilin OS=Drosophila melanogaster OX=7227 GN=chic PE=1 SV=1	-0.149206
>tr|Q9VX36|Q9VX36_DROME NADH dehydrogenase (Ubiquinone) 24 kDa subunit, isoform A OS=Drosophila melanogaster OX=7227 GN=ND-24 PE=1 SV=1	-0.365289		>sp|P25843|PROF_DROME Profilin OS=Drosophila melanogaster OX=7227 GN=chic PE=1 SV=1	-0.149206
>tr|Q8IRZ3|Q8IRZ3_DROME GH16657p OS=Drosophila melanogaster OX=7227 GN=Sdic3 PE=2 SV=3	-0.365666		>tr|M9PE54|M9PE54_DROME Uncharacterized protein, isoform B OS=Drosophila melanogaster OX=7227 GN=BVRA PE=1 SV=1	-0.149258
>tr|Q95RB2|Q95RB2_DROME Cuticular protein 49Ae OS=Drosophila melanogaster OX=7227 GN=Cpr49Ae PE=1 SV=1	-0.365672		>tr|Q9VUW1|Q9VUW1_DROME Inositol-1-monophosphatase OS=Drosophila melanogaster OX=7227 GN=cg17026 PE=2 SV=1	-0.15
>tr|Q95RB2|Q95RB2_DROME Cuticular protein 49Ae OS=Drosophila melanogaster OX=7227 GN=Cpr49Ae PE=1 SV=1	-0.365672		>tr|M9PG67|M9PG67_DROME Uncharacterized protein, isoform D OS=Drosophila melanogaster OX=7227 GN=Dmel\CG5618 PE=1 SV=1	-0.15
>tr|Q95RB2|Q95RB2_DROME Cuticular protein 49Ae OS=Drosophila melanogaster OX=7227 GN=Cpr49Ae PE=1 SV=1	-0.365672		>tr|M9PG67|M9PG67_DROME Uncharacterized protein, isoform D OS=Drosophila melanogaster OX=7227 GN=Dmel\CG5618 PE=1 SV=1	-0.15
>tr|A1Z6L9|A1Z6L9_DROME FI21274p1 OS=Drosophila melanogaster OX=7227 GN=Trap1 PE=1 SV=1	-0.365991		>tr|Q9VUW1|Q9VUW1_DROME Inositol-1-monophosphatase OS=Drosophila melanogaster OX=7227 GN=cg17026 PE=2 SV=1	-0.15
>tr|A1Z6L9|A1Z6L9_DROME FI21274p1 OS=Drosophila melanogaster OX=7227 GN=Trap1 PE=1 SV=1	-0.365991		>tr|Q4V6H2|Q4V6H2_DROME Glutathione peroxidase OS=Drosophila melanogaster OX=7227 GN=Dmel\CG15116 PE=2 SV=1	-0.150259
>tr|A1Z6L9|A1Z6L9_DROME FI21274p1 OS=Drosophila melanogaster OX=7227 GN=Trap1 PE=1 SV=1	-0.365991		>tr|Q9VBF5|Q9VBF5_DROME Aldolase 2, isoform A OS=Drosophila melanogaster OX=7227 GN=Ald2 PE=1 SV=2	-0.150549
>tr|Q9VGM2|Q9VGM2_DROME Fatty acid binding protein, isoform B OS=Drosophila melanogaster OX=7227 GN=fabp PE=1 SV=1	-0.366154		>tr|Q9VTM6|Q9VTM6_DROME Crimpled OS=Drosophila melanogaster OX=7227 GN=crim PE=2 SV=1	-0.150633
>tr|Q9VGM2|Q9VGM2_DROME Fatty acid binding protein, isoform B OS=Drosophila melanogaster OX=7227 GN=fabp PE=1 SV=1	-0.366154		>tr|Q9VTM6|Q9VTM6_DROME Crimpled OS=Drosophila melanogaster OX=7227 GN=crim PE=2 SV=1	-0.150633
>tr|Q9VGM2|Q9VGM2_DROME Fatty acid binding protein, isoform B OS=Drosophila melanogaster OX=7227 GN=fabp PE=1 SV=1	-0.366154		>sp|P12982|PP12_DROME Serine/threonine-protein phosphatase alpha-2 isoform OS=Drosophila melanogaster OX=7227 GN=Pp1-87B PE=1 SV=1	-0.150662
>sp|Q95RJ9|EBI_DROME F-box-like/WD repeat-containing protein ebi OS=Drosophila melanogaster OX=7227 GN=ebi PE=1 SV=2	-0.366286		>sp|P12982|PP12_DROME Serine/threonine-protein phosphatase alpha-2 isoform OS=Drosophila melanogaster OX=7227 GN=Pp1-87B PE=1 SV=1	-0.150662
>tr|Q7K0E6|Q7K0E6_DROME Aspartyl-tRNA synthetase, isoform A OS=Drosophila melanogaster OX=7227 GN=AspRS PE=1 SV=1	-0.368173		>sp|P12982|PP12_DROME Serine/threonine-protein phosphatase alpha-2 isoform OS=Drosophila melanogaster OX=7227 GN=Pp1-87B PE=1 SV=1	-0.150662
>tr|Q7K0E6|Q7K0E6_DROME Aspartyl-tRNA synthetase, isoform A OS=Drosophila melanogaster OX=7227 GN=AspRS PE=1 SV=1	-0.368173		>sp|P31409|VATB_DROME V-type proton ATPase subunit B OS=Drosophila melanogaster OX=7227 GN=Vha55 PE=2 SV=1	-0.150816
>tr|Q9VL01|Q9VL01_DROME FI06461p OS=Drosophila melanogaster OX=7227 GN=c-SPH35 PE=1 SV=1	-0.368473		>sp|P31409|VATB_DROME V-type proton ATPase subunit B OS=Drosophila melanogaster OX=7227 GN=Vha55 PE=2 SV=1	-0.150816
>tr|Q9VL01|Q9VL01_DROME FI06461p OS=Drosophila melanogaster OX=7227 GN=c-SPH35 PE=1 SV=1	-0.368473		>sp|P31409|VATB_DROME V-type proton ATPase subunit B OS=Drosophila melanogaster OX=7227 GN=Vha55 PE=2 SV=1	-0.150816
>tr|Q9VL01|Q9VL01_DROME FI06461p OS=Drosophila melanogaster OX=7227 GN=c-SPH35 PE=1 SV=1	-0.368473		>tr|Q9VZJ8|Q9VZJ8_DROME RH40737p OS=Drosophila melanogaster OX=7227 GN=Dmel\CG11594 PE=1 SV=1	-0.151095
>tr|Q0KI00|Q0KI00_DROME Aminopeptidase OS=Drosophila melanogaster OX=7227 GN=SP1029 PE=1 SV=1	-0.368562		>tr|Q9VZJ8|Q9VZJ8_DROME RH40737p OS=Drosophila melanogaster OX=7227 GN=Dmel\CG11594 PE=1 SV=1	-0.151095
>sp|Q9VGR2|NDUF7_DROME Protein arginine methyltransferase NDUFAF7 homolog, mitochondrial OS=Drosophila melanogaster OX=7227 GN=CG17726 PE=2 SV=1	-0.36865		>tr|Q9VZJ8|Q9VZJ8_DROME RH40737p OS=Drosophila melanogaster OX=7227 GN=Dmel\CG11594 PE=1 SV=1	-0.151095
>sp|Q9VTP4|R10AB_DROME 60S ribosomal protein L10a-2 OS=Drosophila melanogaster OX=7227 GN=RpL10Ab PE=1 SV=2	-0.369124		>tr|Q7JWD6|Q7JWD6_DROME Elongin C, isoform A OS=Drosophila melanogaster OX=7227 GN=EloC PE=1 SV=1	-0.151282
>tr|A1Z7F1|A1Z7F1_DROME Maltase A6, isoform C OS=Drosophila melanogaster OX=7227 GN=Mal-A6 PE=1 SV=2	-0.369218		>sp|Q9VQ37|RIM2_DROME Mitochondrial carrier protein Rim2 OS=Drosophila melanogaster OX=7227 GN=Rim2 PE=2 SV=2	-0.151507
>sp|Q9VLM8|SYAC_DROME Alanine--tRNA ligase, cytoplasmic OS=Drosophila melanogaster OX=7227 GN=AlaRS PE=2 SV=1	-0.369462		>tr|Q961B9|Q961B9_DROME LD24073p OS=Drosophila melanogaster OX=7227 GN=LD24073p PE=2 SV=1	-0.151628
>sp|Q9VLM8|SYAC_DROME Alanine--tRNA ligase, cytoplasmic OS=Drosophila melanogaster OX=7227 GN=AlaRS PE=2 SV=1	-0.369462		>sp|Q27593|CP6A8_DROME Cytochrome P450 6a8 OS=Drosophila melanogaster OX=7227 GN=Cyp6a8 PE=2 SV=2	-0.151976
>sp|Q9VLM8|SYAC_DROME Alanine--tRNA ligase, cytoplasmic OS=Drosophila melanogaster OX=7227 GN=AlaRS PE=2 SV=1	-0.369462		>tr|Q9VB69|Q9VB69_DROME Malic enzyme OS=Drosophila melanogaster OX=7227 GN=Men-b PE=1 SV=1	-0.152026
>sp|Q9VLV5|RUXE_DROME Probable small nuclear ribonucleoprotein E OS=Drosophila melanogaster OX=7227 GN=SmE PE=1 SV=1	-0.370213		>tr|Q9VB69|Q9VB69_DROME Malic enzyme OS=Drosophila melanogaster OX=7227 GN=Men-b PE=1 SV=1	-0.152026
>sp|Q9VLV5|RUXE_DROME Probable small nuclear ribonucleoprotein E OS=Drosophila melanogaster OX=7227 GN=SmE PE=1 SV=1	-0.370213		>tr|Q9VB69|Q9VB69_DROME Malic enzyme OS=Drosophila melanogaster OX=7227 GN=Men-b PE=1 SV=1	-0.152026
>tr|Q9V3V6|Q9V3V6_DROME 26S proteasome regulatory complex subunit p50 OS=Drosophila melanogaster OX=7227 GN=Rpt5 PE=1 SV=1	-0.370794		>tr|Q9VEJ0|Q9VEJ0_DROME Peroxiredoxin 3 OS=Drosophila melanogaster OX=7227 GN=Prx3 PE=1 SV=2	-0.152137
>sp|Q24492|RFA1_DROME Replication protein A 70 kDa DNA-binding subunit OS=Drosophila melanogaster OX=7227 GN=RpA-70 PE=1 SV=1	-0.370813		>tr|Q9VEJ0|Q9VEJ0_DROME Peroxiredoxin OS=Drosophila melanogaster OX=7227 GN=Prx3 PE=1 SV=2	-0.152137
>tr|Q9VZL5|Q9VZL5_DROME Caffeine, calcium, zinc sensitivity 1 OS=Drosophila melanogaster OX=7227 GN=Ccz1 PE=2 SV=3	-0.370928		>tr|Q9VEJ0|Q9VEJ0_DROME Peroxiredoxin OS=Drosophila melanogaster OX=7227 GN=Prx3 PE=1 SV=2	-0.152137
>tr|Q7K127|Q7K127_DROME Alpha-galactosidase OS=Drosophila melanogaster OX=7227 GN=CT24026 PE=1 SV=1	-0.371223		>tr|Q9VIX4|Q9VIX4_DROME Acyl-coenzyme A oxidase OS=Drosophila melanogaster OX=7227 GN=Dmel\CG17544 PE=1 SV=2	-0.152381
>tr|Q7K127|Q7K127_DROME Alpha-galactosidase OS=Drosophila melanogaster OX=7227 GN=CT24026 PE=1 SV=1	-0.371223		>tr|Q9VIX4|Q9VIX4_DROME Acyl-coenzyme A oxidase OS=Drosophila melanogaster OX=7227 GN=Dmel\CG17544 PE=1 SV=2	-0.152381
>sp|P17276|PH4H_DROME Protein henna OS=Drosophila melanogaster OX=7227 GN=Hn PE=2 SV=3	-0.371239		>tr|Q7K1W4|Q7K1W4_DROME Epoxide hydrolase OS=Drosophila melanogaster OX=7227 GN=Jheh3 PE=2 SV=1	-0.152778
>sp|P17276|PH4H_DROME Protein henna OS=Drosophila melanogaster OX=7227 GN=Hn PE=2 SV=3	-0.371239		>tr|Q9W022|Q9W022_DROME GEO01508p1 OS=Drosophila melanogaster OX=7227 GN=Dmel\CG8993 PE=1 SV=1	-0.152817
>sp|Q9VHD2|MAAI2_DROME Probable maleylacetoacetate isomerase 2 OS=Drosophila melanogaster OX=7227 GN=GstZ2 PE=1 SV=1	-0.371366		>tr|Q9W022|Q9W022_DROME GEO01508p1 OS=Drosophila melanogaster OX=7227 GN=Dmel\CG8993 PE=1 SV=1	-0.152817
>sp|Q24560|TBB1_DROME Tubulin beta-1 chain OS=Drosophila melanogaster OX=7227 GN=betaTub56D PE=1 SV=2	-0.371588		>tr|Q9W022|Q9W022_DROME GEO01508p1 OS=Drosophila melanogaster OX=7227 GN=Dmel\CG8993 PE=1 SV=1	-0.152817
>sp|Q24560|TBB1_DROME Tubulin beta-1 chain OS=Drosophila melanogaster OX=7227 GN=betaTub56D PE=1 SV=2	-0.371588		>sp|P15364|AMAL_DROME Protein amalgam OS=Drosophila melanogaster OX=7227 GN=Ama PE=2 SV=2	-0.153153
>sp|Q24560|TBB1_DROME Tubulin beta-1 chain OS=Drosophila melanogaster OX=7227 GN=betaTub56D PE=1 SV=2	-0.371588		>sp|Q9V463|NU154_DROME Nuclear pore complex protein Nup154 OS=Drosophila melanogaster OX=7227 GN=Nup154 PE=1 SV=1	-0.153407
>tr|Q9W369|Q9W369_DROME Mutant tan OS=Drosophila melanogaster OX=7227 GN=t PE=1 SV=1	-0.371835		>tr|Q7JWE2|Q7JWE2_DROME GH09427p OS=Drosophila melanogaster OX=7227 GN=CG6183 PE=2 SV=1	-0.154317
>tr|Q9W369|Q9W369_DROME Mutant tan OS=Drosophila melanogaster OX=7227 GN=t PE=1 SV=1	-0.371835		>tr|Q7JWE2|Q7JWE2_DROME GH09427p OS=Drosophila melanogaster OX=7227 GN=CG6183 PE=2 SV=1	-0.154317
>tr|Q9W369|Q9W369_DROME Mutant tan OS=Drosophila melanogaster OX=7227 GN=t PE=1 SV=1	-0.371835		>tr|Q7JWE2|Q7JWE2_DROME GH09427p OS=Drosophila melanogaster OX=7227 GN=CG6183 PE=2 SV=1	-0.154317
>tr|Q86BJ0|Q86BJ0_DROME Uncharacterized protein, isoform C OS=Drosophila melanogaster OX=7227 GN=Dmel\CG18135 PE=1 SV=1	-0.372433		>sp|P19967|CYB5R_DROME Cytochrome b5-related protein OS=Drosophila melanogaster OX=7227 GN=Cyt-b5-r PE=2 SV=2	-0.155505
>tr|Q86BJ0|Q86BJ0_DROME Uncharacterized protein, isoform C OS=Drosophila melanogaster OX=7227 GN=Dmel\CG18135 PE=1 SV=1	-0.372433		>sp|P19967|CYB5R_DROME Cytochrome b5-related protein OS=Drosophila melanogaster OX=7227 GN=Cyt-b5-r PE=2 SV=2	-0.155505
>tr|Q8IRH0|Q8IRH0_DROME LP21249p OS=Drosophila melanogaster OX=7227 GN=Psa PE=1 SV=1	-0.372555		>sp|P19967|CYB5R_DROME Cytochrome b5-related protein OS=Drosophila melanogaster OX=7227 GN=Cyt-b5-r PE=2 SV=2	-0.155505
>tr|Q8IRH0|Q8IRH0_DROME LP21249p OS=Drosophila melanogaster OX=7227 GN=Psa PE=1 SV=1	-0.372555		>sp|P08879|NDKA_DROME Nucleoside diphosphate kinase OS=Drosophila melanogaster OX=7227 GN=awd PE=1 SV=3	-0.155556
>tr|Q8IRH0|Q8IRH0_DROME LP21249p OS=Drosophila melanogaster OX=7227 GN=Psa PE=1 SV=1	-0.372555		>sp|P08879|NDKA_DROME Nucleoside diphosphate kinase OS=Drosophila melanogaster OX=7227 GN=awd PE=1 SV=3	-0.155556
>sp|Q9Y105|SYQ_DROME Probable glutamine--tRNA ligase OS=Drosophila melanogaster OX=7227 GN=GlnRS PE=2 SV=1	-0.372879		>sp|P08879|NDKA_DROME Nucleoside diphosphate kinase OS=Drosophila melanogaster OX=7227 GN=awd PE=1 SV=3	-0.155556
>sp|Q9Y105|SYQ_DROME Probable glutamine--tRNA ligase OS=Drosophila melanogaster OX=7227 GN=GlnRS PE=2 SV=1	-0.372879		>tr|A0A0B4LHH1|A0A0B4LHH1_DROME Glycerol-3-phosphate acyltransferase 4, isoform E OS=Drosophila melanogaster OX=7227 GN=Gpat4 PE=1 SV=1	-0.156053
>sp|P24785|MLE_DROME Dosage compensation regulator OS=Drosophila melanogaster OX=7227 GN=mle PE=1 SV=2	-0.373163		>tr|A0A0B4LHH1|A0A0B4LHH1_DROME Glycerol-3-phosphate acyltransferase 4, isoform E OS=Drosophila melanogaster OX=7227 GN=Gpat4 PE=1 SV=1	-0.156053
>sp|P11997|LSP1G_DROME Larval serum protein 1 gamma chain OS=Drosophila melanogaster OX=7227 GN=Lsp1gamma PE=2 SV=2	-0.373446		>tr|Q9XYZ9|Q9XYZ9_DROME Glutathione S transferase E12, isoform A OS=Drosophila melanogaster OX=7227 GN=GstE12 PE=1 SV=1	-0.156502
>sp|P11997|LSP1G_DROME Larval serum protein 1 gamma chain OS=Drosophila melanogaster OX=7227 GN=Lsp1gamma PE=2 SV=2	-0.373446		>tr|Q9XYZ9|Q9XYZ9_DROME Glutathione S transferase E12, isoform A OS=Drosophila melanogaster OX=7227 GN=GstE12 PE=1 SV=1	-0.156502
>sp|P11997|LSP1G_DROME Larval serum protein 1 gamma chain OS=Drosophila melanogaster OX=7227 GN=Lsp1gamma PE=2 SV=2	-0.373446		>tr|Q9XYZ9|Q9XYZ9_DROME Glutathione S transferase E12, isoform A OS=Drosophila melanogaster OX=7227 GN=GstE12 PE=1 SV=1	-0.156502
>sp|P34082|FAS2_DROME Fasciclin-2 OS=Drosophila melanogaster OX=7227 GN=Fas2 PE=1 SV=1	-0.373883		>sp|Q8MSU4|SYMPK_DROME Symplekin OS=Drosophila melanogaster OX=7227 GN=Sym PE=1 SV=1	-0.156652
>sp|P34082|FAS2_DROME Fasciclin-2 OS=Drosophila melanogaster OX=7227 GN=Fas2 PE=1 SV=1	-0.373883		>sp|Q9VU95|AGT2L_DROME Alanine--glyoxylate aminotransferase 2-like OS=Drosophila melanogaster OX=7227 GN=CG8745 PE=2 SV=2	-0.15668
>sp|P34082|FAS2_DROME Fasciclin-2 OS=Drosophila melanogaster OX=7227 GN=Fas2 PE=1 SV=1	-0.373883		>sp|Q9VU95|AGT2L_DROME Alanine--glyoxylate aminotransferase 2-like OS=Drosophila melanogaster OX=7227 GN=CG8745 PE=2 SV=2	-0.15668
>tr|Q0E9N2|Q0E9N2_DROME Lethal (2) 01289, isoform K OS=Drosophila melanogaster OX=7227 GN=l(2)01289 PE=1 SV=3	-0.374914		>sp|Q9VU95|AGT2L_DROME Alanine--glyoxylate aminotransferase 2-like OS=Drosophila melanogaster OX=7227 GN=CG8745 PE=2 SV=2	-0.15668
>tr|Q9VSL5|Q9VSL5_DROME Glutathione S transferase O2, isoform A OS=Drosophila melanogaster OX=7227 GN=GstO2 PE=1 SV=2	-0.375299		>sp|Q9Y0Y2|PURA_DROME Adenylosuccinate synthetase OS=Drosophila melanogaster OX=7227 GN=AdSS PE=2 SV=1	-0.156823
>sp|Q9VTJ4|FUCO_DROME Putative alpha-L-fucosidase OS=Drosophila melanogaster OX=7227 GN=Fuca PE=2 SV=2	-0.375506		>sp|Q9Y0Y2|PURA_DROME Adenylosuccinate synthetase OS=Drosophila melanogaster OX=7227 GN=AdSS PE=2 SV=1	-0.156823
>sp|Q9VA02|DHTK1_DROME Probable 2-oxoglutarate dehydrogenase E1 component DHKTD1 homolog, mitochondrial OS=Drosophila melanogaster OX=7227 GN=CG1544 PE=2 SV=2	-0.375734		>sp|Q9Y0Y2|PURA_DROME Adenylosuccinate synthetase OS=Drosophila melanogaster OX=7227 GN=AdSS PE=2 SV=1	-0.156823
>sp|Q9VA02|DHTK1_DROME Probable 2-oxoglutarate dehydrogenase E1 component DHKTD1 homolog, mitochondrial OS=Drosophila melanogaster OX=7227 GN=CG1544 PE=2 SV=2	-0.375734		>tr|Q9W543|Q9W543_DROME Rabconnectin-3B, isoform A OS=Drosophila melanogaster OX=7227 GN=Rbcn-3B PE=1 SV=1	-0.156852
>sp|Q9VGS2|TCTP_DROME Translationally-controlled tumor protein homolog OS=Drosophila melanogaster OX=7227 GN=Tctp PE=1 SV=1	-0.376163		>tr|Q9W543|Q9W543_DROME Rabconnectin-3B, isoform A OS=Drosophila melanogaster OX=7227 GN=Rbcn-3B PE=1 SV=1	-0.156852
>sp|Q9VGS2|TCTP_DROME Translationally-controlled tumor protein homolog OS=Drosophila melanogaster OX=7227 GN=Tctp PE=1 SV=1	-0.376163		>tr|Q9VMH4|Q9VMH4_DROME FI09914p OS=Drosophila melanogaster OX=7227 GN=Dmel\CG9175 PE=2 SV=1	-0.157753
>sp|P20351|T23O_DROME Tryptophan 2,3-dioxygenase OS=Drosophila melanogaster OX=7227 GN=v PE=1 SV=1	-0.377573		>tr|Q9VMH4|Q9VMH4_DROME FI09914p OS=Drosophila melanogaster OX=7227 GN=Dmel\CG9175 PE=2 SV=1	-0.157753
>sp|P20351|T23O_DROME Tryptophan 2,3-dioxygenase OS=Drosophila melanogaster OX=7227 GN=v PE=1 SV=1	-0.377573		>sp|Q9VBG6|HGH1_DROME Protein HGH1 homolog OS=Drosophila melanogaster OX=7227 GN=CG6073 PE=2 SV=2	-0.157995
>sp|P08171|EST6_DROME Esterase-6 OS=Drosophila melanogaster OX=7227 GN=Est-6 PE=1 SV=2	-0.377574		>tr|Q1RL06|Q1RL06_DROME Glutathione synthetase 1, isoform G OS=Drosophila melanogaster OX=7227 GN=Gss2 PE=1 SV=1	-0.158468
>sp|P08171|EST6_DROME Esterase-6 OS=Drosophila melanogaster OX=7227 GN=Est-6 PE=1 SV=2	-0.377574		>tr|Q8IQZ1|Q8IQZ1_DROME Glutathione synthetase OS=Drosophila melanogaster OX=7227 GN=Gss2 PE=1 SV=2	-0.158656
>sp|P08171|EST6_DROME Esterase-6 OS=Drosophila melanogaster OX=7227 GN=Est-6 PE=1 SV=2	-0.377574		>tr|Q8IQZ1|Q8IQZ1_DROME Glutathione synthetase OS=Drosophila melanogaster OX=7227 GN=Gss2 PE=1 SV=2	-0.158656
>tr|Q9VKU5|Q9VKU5_DROME LD37206p OS=Drosophila melanogaster OX=7227 GN=Dmel\CG6144 PE=1 SV=3	-0.377632		>sp|Q24583|VATF1_DROME V-type proton ATPase subunit F 1 OS=Drosophila melanogaster OX=7227 GN=Vha14-1 PE=1 SV=1	-0.158871
>tr|Q9VI17|Q9VI17_DROME SCP domain-containing protein OS=Drosophila melanogaster OX=7227 GN=Dmel\CG42564 PE=4 SV=2	-0.378		>sp|Q24583|VATF1_DROME V-type proton ATPase subunit F 1 OS=Drosophila melanogaster OX=7227 GN=Vha14-1 PE=1 SV=1	-0.158871
>tr|Q9VD00|Q9VD00_DROME FI07666p OS=Drosophila melanogaster OX=7227 GN=Dmel\CG5377 PE=1 SV=1	-0.378058		>tr|Q7KSB5|Q7KSB5_DROME S-formylglutathione hydrolase OS=Drosophila melanogaster OX=7227 GN=Dmel\CG4390 PE=1 SV=1	-0.159394
>tr|Q9VZ35|Q9VZ35_DROME Vago, isoform B OS=Drosophila melanogaster OX=7227 GN=Vago PE=4 SV=1	-0.378125		>tr|Q7KSB5|Q7KSB5_DROME S-formylglutathione hydrolase OS=Drosophila melanogaster OX=7227 GN=Dmel\CG4390 PE=1 SV=1	-0.159394
>tr|A8JV30|A8JV30_DROME FI17379p1 OS=Drosophila melanogaster OX=7227 GN=Dmel\CG34327 PE=2 SV=1	-0.378182		>tr|Q7KSB5|Q7KSB5_DROME S-formylglutathione hydrolase OS=Drosophila melanogaster OX=7227 GN=Dmel\CG4390 PE=1 SV=1	-0.159394
>sp|Q07327|ROP_DROME Protein ROP OS=Drosophila melanogaster OX=7227 GN=Rop PE=2 SV=2	-0.378224		>tr|Q9VG81|Q9VG81_DROME RH49330p OS=Drosophila melanogaster OX=7227 GN=Sccpdh2 PE=1 SV=1	-0.160093
>sp|Q07327|ROP_DROME Protein ROP OS=Drosophila melanogaster OX=7227 GN=Rop PE=2 SV=2	-0.378224		>tr|Q9VG81|Q9VG81_DROME RH49330p OS=Drosophila melanogaster OX=7227 GN=Sccpdh2 PE=1 SV=1	-0.160093
>sp|Q07327|ROP_DROME Protein ROP OS=Drosophila melanogaster OX=7227 GN=Rop PE=2 SV=2	-0.378224		>tr|Q9VG81|Q9VG81_DROME RH49330p OS=Drosophila melanogaster OX=7227 GN=Sccpdh2 PE=1 SV=1	-0.160093
>tr|Q9VP50|Q9VP50_DROME SD17025p OS=Drosophila melanogaster OX=7227 GN=Dmel\CG7632 PE=1 SV=1	-0.378485		>sp|Q9VCK2|GILT3_DROME GILT-like protein 3 OS=Drosophila melanogaster OX=7227 GN=GILT3 PE=2 SV=1	-0.160185
>tr|Q86B83|Q86B83_DROME LD12611p OS=Drosophila melanogaster OX=7227 GN=CG5340 PE=1 SV=1	-0.378852		>tr|Q9W3X6|Q9W3X6_DROME FI05334p OS=Drosophila melanogaster OX=7227 GN=Fum1 PE=1 SV=3	-0.160202
>sp|Q9VIW3|RAGP1_DROME Ran GTPase-activating protein OS=Drosophila melanogaster OX=7227 GN=RanGAP PE=1 SV=1	-0.379195		>tr|Q9W3X6|Q9W3X6_DROME FI05334p OS=Drosophila melanogaster OX=7227 GN=Fum1 PE=1 SV=3	-0.160202
>tr|Q9VJ68|Q9VJ68_DROME FI20105p1 OS=Drosophila melanogaster OX=7227 GN=Dmel\CG31751 PE=1 SV=2	-0.380576		>tr|Q9W3X6|Q9W3X6_DROME FI05334p OS=Drosophila melanogaster OX=7227 GN=Fum1 PE=1 SV=3	-0.160202
>tr|Q9VJ68|Q9VJ68_DROME FI20105p1 OS=Drosophila melanogaster OX=7227 GN=Dmel\CG31751 PE=1 SV=2	-0.380576		>tr|Q6NR46|Q6NR46_DROME RE58623p OS=Drosophila melanogaster OX=7227 GN=Spt-I PE=1 SV=1	-0.16047
>tr|Q9VJ68|Q9VJ68_DROME FI20105p1 OS=Drosophila melanogaster OX=7227 GN=Dmel\CG31751 PE=1 SV=2	-0.380576		>tr|M9PDM4|M9PDM4_DROME Phosphatidylinositol 4-kinase III alpha, isoform D OS=Drosophila melanogaster OX=7227 GN=PI4KIIIalpha PE=1 SV=1	-0.160864
>tr|Q86PD3|Q86PD3_DROME RE56416p OS=Drosophila melanogaster OX=7227 GN=CG30022;CG30023 PE=1 SV=1	-0.380645		>tr|M9PDM4|M9PDM4_DROME Phosphatidylinositol 4-kinase III alpha, isoform D OS=Drosophila melanogaster OX=7227 GN=Pi4KIIIalpha PE=1 SV=1	-0.160864
>tr|Q86PD3|Q86PD3_DROME RE56416p OS=Drosophila melanogaster OX=7227 GN=CG30022;CG30023 PE=1 SV=1	-0.380645		>tr|Q9VMR6|Q9VMR6_DROME MIP06029p OS=Drosophila melanogaster OX=7227 GN=Dmel\CG12512 PE=1 SV=1	-0.160877
>tr|Q9VAI9|Q9VAI9_DROME GEO07291p1 OS=Drosophila melanogaster OX=7227 GN=Obp99c PE=1 SV=1	-0.380795		>sp|Q7KSC4|MPC1_DROME Mitochondrial pyruvate carrier 1 OS=Drosophila melanogaster OX=7227 GN=Mpc1 PE=3 SV=1	-0.161682
>tr|Q9VAI9|Q9VAI9_DROME GEO07291p1 OS=Drosophila melanogaster OX=7227 GN=Obp99c PE=1 SV=1	-0.380795		>sp|Q7KSC4|MPC1_DROME Mitochondrial pyruvate carrier 1 OS=Drosophila melanogaster OX=7227 GN=Mpc1 PE=3 SV=1	-0.161682
>tr|Q9VAI9|Q9VAI9_DROME GEO07291p1 OS=Drosophila melanogaster OX=7227 GN=Obp99c PE=1 SV=1	-0.380795		>tr|Q9VEY4|Q9VEY4_DROME LD45246p OS=Drosophila melanogaster OX=7227 GN=Dmel\CG5916 PE=2 SV=2	-0.162727
>tr|Q8INL3|Q8INL3_DROME Peptide deformylase OS=Drosophila melanogaster OX=7227 GN=Dmel\CG31373 PE=3 SV=1	-0.381122		>tr|Q9VHA2|Q9VHA2_DROME GH08387p OS=Drosophila melanogaster OX=7227 GN=SpdS PE=1 SV=2	-0.163134
>tr|Q9VTB3|Q9VTB3_DROME GH06691p OS=Drosophila melanogaster OX=7227 GN=Dmel\CG11811 PE=1 SV=1	-0.381974		>tr|Q9VHA2|Q9VHA2_DROME GH08387p OS=Drosophila melanogaster OX=7227 GN=SpdS PE=1 SV=2	-0.163134
>tr|A0A0B4K709|A0A0B4K709_DROME Uncharacterized protein, isoform E OS=Drosophila melanogaster OX=7227 GN=CG13818 PE=1 SV=1	-0.382649		>tr|A0A0B4K6F9|A0A0B4K6F9_DROME Extended synaptotagmin-like protein 2, isoform C OS=Drosophila melanogaster OX=7227 GN=Esyt2 PE=1 SV=1	-0.163306
>tr|Q9VTB0|Q9VTB0_DROME LD35289p OS=Drosophila melanogaster OX=7227 GN=Dmel\CG8003 PE=1 SV=1	-0.383047		>tr|A0A0B4K6F9|A0A0B4K6F9_DROME Extended synaptotagmin-like protein 2, isoform C OS=Drosophila melanogaster OX=7227 GN=Esyt2 PE=1 SV=1	-0.163306
>sp|P22817|IDE_DROME Insulin-degrading enzyme OS=Drosophila melanogaster OX=7227 GN=Ide PE=1 SV=4	-0.383131		>tr|Q9Y164|Q9Y164_DROME BcDNA.GH02439 OS=Drosophila melanogaster OX=7227 GN=BcDNA.GH02439 PE=1 SV=1	-0.163315
>tr|Q9VB23|Q9VB23_DROME Serine/threonine protein phosphatase 2A regulatory subunit OS=Drosophila melanogaster OX=7227 GN=wdb PE=1 SV=2	-0.383779		>tr|Q8INA9|Q8INA9_DROME Fasciclin 1, isoform C OS=Drosophila melanogaster OX=7227 GN=Fas1 PE=1 SV=1	-0.164122
>tr|Q9VB23|Q9VB23_DROME Serine/threonine protein phosphatase 2A regulatory subunit OS=Drosophila melanogaster OX=7227 GN=wdb PE=1 SV=2	-0.383779		>tr|Q8INA9|Q8INA9_DROME Fasciclin 1, isoform C OS=Drosophila melanogaster OX=7227 GN=Fas1 PE=1 SV=1	-0.164122
>sp|Q9VQZ6|ELP3_DROME Elongator complex protein 3 OS=Drosophila melanogaster OX=7227 GN=Elp3 PE=2 SV=1	-0.384058		>tr|Q8INA9|Q8INA9_DROME Fasciclin 1, isoform C OS=Drosophila melanogaster OX=7227 GN=Fas1 PE=1 SV=1	-0.164122
>tr|A0A0B4K683|A0A0B4K683_DROME Ribosomal protein S5b, isoform B OS=Drosophila melanogaster OX=7227 GN=RpS5b PE=3 SV=1	-0.385		>tr|M9NFF0|M9NFF0_DROME Uncharacterized protein, isoform H OS=Drosophila melanogaster OX=7227 GN=BcDNA:RE63764 PE=1 SV=1	-0.164179
>tr|A0A0B4K683|A0A0B4K683_DROME Ribosomal protein S5b, isoform B OS=Drosophila melanogaster OX=7227 GN=RpS5b PE=3 SV=1	-0.385		>tr|Q9VPW2|Q9VPW2_DROME Cysteine protease OS=Drosophila melanogaster OX=7227 GN=Atg4a PE=1 SV=1	-0.164477
>tr|Q95SN8|Q95SN8_DROME GH12395p OS=Drosophila melanogaster OX=7227 GN=CG17837 PE=1 SV=1	-0.385563		>tr|Q9W260|Q9W260_DROME GH03113p OS=Drosophila melanogaster OX=7227 GN=wrapper PE=1 SV=2	-0.1646
[truncated: 4,736 more rows]

## Sheet: Sheet3
Fig 4D GO term for cellular compartment					Fig 4E Prediction of proteins with transmembrane helices (TMHS)
[truncated: 200 more rows]

[truncated: 1 more sheets: Sheet4]
