# Supplementary material for: Drosophila nicotinic acetylcholine receptor subunits and their native interactions with insecticidal peptide toxins
Source: eLife. 2022 May 16;11:e74322. doi: 10.7554/eLife.74322 (PMC9110030; doi:10.7554/eLife.74322)
Supplement: Figure 5—source data 1. [file elife-74322-fig5-data1.xlsx]

## Sheet: Info
Sheet	Figure	Number of figure (short number)	Name of Figure (short name)
Sheet1	Figure 5	Fig 5B	Numbers of idenified unique peptide in wild-type and nulls
Sheet2	Figure 5	Fig 5E	KEGG pathway enrichment analysis

## Sheet: Sheet1
Fig 5B Numbers of idenified unique peptide in wild-type and nulls
Replicates	Name	Subunit	Peptide	Peptides	unique peptide	PSM
First	nAChRα5 null	Non	Non	Non	Non	Non
Second	nAChRα5 null	Non	Non	Non	Non	Non
Third	nAChRα5 null	Da7	MQRPGQVGYECPPPPSSSCSSSASGEKKQQIQNVELK	5	4	5
			SLLANVLDIDDDFR
			CASATLPHQPTYYR
			QGDDGSVGPVGPAGPVVDGR
		Da6	TILLSNR	3	2	3
			SLLANVLDI DDDFR
			ELQFITARMR
Fourth	nAChRα5 null	Da7	IDITWFPFDDQR	4	4	6
			KQQIQNVELKER
			QGDDGSVGPVGPAGPVVDGR
		Da6	TILLSNR	3	3	3
			ELQFITARMR
			ADDEAELIGWK
Replicates	Name	Subunit	Peptide	Peptides	unique peptide	PSM
First	nAChRα6 null	Da7	QGDDGSVGPVGPAGPVVDGR	1	1	1
		Da5	TVYGQGDDGSIGPIGSTR	2	2	2
			FITDQLR
Second	nAChRα6 null	Da7	QGDDGSVGPVGPAGPVVDGR	1	1	1
		Da5	TVYGQGDDGSIGPIGSTR	1	1	2
Third	nAChRα6 null	Da7	IDITWFPFDDQR	6	5	7
			KQQIQNVELKER
			QGDDGSVGPVGPAGPVVDGR
			WITEQLK
			EDETSDITR
		Da5	IDITWFPFDDQR	2	1	2
			TVYGQGDDGSIGPIGSTR
Replicates	Name	Subunit	Peptide	Peptides	unique peptide	PSM
First	nAChRα7 null	Non	Non	Non	Non	Non
Second	nAChRα7 null	Da6	LLANVLDIDDDFR	2	1	2
Third	nAChRα7 null	Da6	TILLSNR	2	2	2
			ELQFITARMR
		Da5	TVYGQGDDGSIGPIGSTR	1	1	1
Fourth	nAChRα7 null	Da6	TADIHEMPPWIK	3	3	3
			KTILLSNR
			ELQFITARMR
		Da5	TVYGQGDDGSIGPIGSTR	1	1	1
Replicates	Name	Subunit	Peptide	Peptides	unique peptide	PSM
n > 3	Wild-type (THattP40)	Da5	TVYGQGDDGSIGPIGSTR	multiple	Da5 6	multiple
		Da5	FITDQLR	multiple	Da6 4	multiple
		Da5	KHQILSDVELKER	multiple	Da7 11	multiple
		Da5	SSTEYELGLILK
		Da5, Da7	LEWNDMNLR
		Da5, Da7	NNGSCLYVPPGIFK
		Da6	ELQFITAR
		Da6	TILLSNR
		Da6	ADDEAELIGDWK
		Da6, Da7	IDITWFPFDDQR
		Da7	SLLANVLDIDDDFRcNHR
		Da7	KQQIQNVELKER
		Da7	QGDDGSVGPVGPAGPVVDGR
		Da7	QQIQNVELKER
		Da7	MQRPGQVGYECPPPPSSSSSSASGEK
		Da7	CASATLPHQPTYYR
		Da7	WITEQLKKEDETSDITR
		Da7	CNHRCASATLPHQPTYYR

## Sheet: Sheet2
Fig 5E KEGG pathway enrichment analysis
	* used for Fig. 5E
		Category	variable	Term	Count *	%	Pvalue *	Genes	List Total	Pop Hits	Pop Total	Enrichment*	Bonferroni	Benjamini	FDR	Enrichment_factor
		KEGG_PATHWAY	WT	Oxidative phosphorylation	32	5.50775	1.70433e-12	Q8SYJ2, P18930, Q6IDF5, Q9VKZ1, A8DYC5, Q9VTU2, Q9VMS1, A1ZBF7, P00408, P84345, P18929, Q8IML4, Q9VQ29, P00399, P00850, Q9VIQ8, Q9W3X7, Q9W2E8, Q9VHR9, Q9W141, P00417, Q9VQM2, Q9VE75, P18931, P18932, P18935, Q9W402, Q9VHS2, Q9V3L7, P23380, Q9V3W2, Q9VGS3	149	139	2737	4.22886	1.09075e-10	1.09075e-10	1.7314e-09	0.230216
		KEGG_PATHWAY	WT	Protein processing in endoplasmic reticulum	24	4.13081	1.08526e-07	Q7JZN0, Q9XZ53, Q9VWE9, Q9W335, Q9VFP0, Q9VMH4, Q9VS57, Q9V3A8, Q8STG9, Q76NQ0, Q8SY53, Q9VRE0, Q9VLM5, Q9VL69, Q9VP10, Q9VL50, Q9VAL7, Q9W0M4, Q24319, P53624, Q9V415, Q9W5C2, Q9VUZ0, Q7K110	149	126	2737	3.49888	6.94565e-06	3.47283e-06	0.000110252	0.190476
		KEGG_PATHWAY	WT	Protein export	10	1.72117	8.44984e-07	Q7JZN0, Q9VWE9, Q9VL50, Q9VYY2, Q9Y171, Q9VS57, Q8STG9, O97066, Q9VAL0, Q9VCA9	149	22	2737	8.3496	5.40775e-05	1.80262e-05	0.000858419	0.454545
		KEGG_PATHWAY	WT	N-Glycan biosynthesis	10	1.72117	8.31032e-05	Q9VLM5, Q9XZ53, Q9VBV8, Q27333, P53624, Q24319, Q8SY53, Q76NQ0, Q7K110, Q9VRE0	149	36	2737	5.10254	0.00530471	0.00132882	0.0843927	0.277778
		KEGG_PATHWAY	WT	Fatty acid metabolism	10	1.72117	0.00029754	Q9VJX8, Q9VZL3, Q9VKD2, A1Z784, Q9VA93, Q9W3N1, Q9VVT8, Q7JQH9, Q9W3C7, Q7K4Y0	149	42	2737	4.3736	0.0188651	0.00380183	0.30186	0.238095
		KEGG_PATHWAY	WT	Metabolic pathways	69	11.8761	0.000475096	Q9VZM5, Q6IDF5, A0A0B4KEL0, Q9VKZ1, Q8MRN5, A8DYC5, Q9VTU2, Q9VMS1, Q9W464, Q9VPD3, Q9Y169, Q9W228, A0A0B4LHH1, A1Z784, Q8IML4, Q9VQ29, P00399, Q8SZY4, P53624, Q9VIQ8, Q8SX37, Q9VJ46, Q9W141, P00417, Q9VE75, P18931, Q9W3C4, P18932, Q9VLM5, P18935, Q94515, Q9W274, Q9W402, Q9VGS9, Q9VA70, Q24319, Q9W3C7, Q9V3L7, Q9V3W2, Q9VGS3, Q8SYJ2, Q9W2J4, P18930, Q9XZ53, Q9VV49, M9PCA6, Q76NQ0, Q8SY53, A1ZBF7,…	149	901	2737	1.40674	0.0299555	0.00505607	0.481602	0.0765816
		KEGG_PATHWAY	WT	ABC transporters	5	0.860585	0.000836189	Q7KVB1, M9PF96, A0A0B4KGI0, Q9VYL5, Q7JUN3	149	9	2737	10.2051	0.0521305	0.00761918	0.846241	0.555556
		KEGG_PATHWAY	WT	Lysosome	14	2.40964	0.00120276	Q9W3C4, Q9Y168, Q7K2V7, Q9VID1, Q7K1I4, Q8IML4, M9PCA6, Q9V9S0, Q9VL24, Q9W3C7, P23380, A1ZBF7, Q9VE75, A0A0B4KH68	149	93	2737	2.76525	0.0741312	0.00958165	1.21518	0.150538
		KEGG_PATHWAY	WT	Phagosome	12	2.0654	0.0019408	Q9VM97, Q7JZN0, Q9VWE9, Q9VAL7, Q8IML4, Q9V9S0, O77434, Q8STG9, P11584, A1ZBF7, Q9VE75, P23380	149	75	2737	2.93906	0.116913	0.0137197	1.95423	0.16
		KEGG_PATHWAY	WT	Biosynthesis of unsaturated fatty acids	6	1.0327	0.00208723	Q9VJX8, Q9VZL3, Q9VKD2, Q9VA93, Q9W3N1, Q7K4Y0	149	18	2737	6.12304	0.125167	0.0132832	2.10027	0.333333
		KEGG_PATHWAY	WT	Glycerophospholipid metabolism	10	1.72117	0.0038068	Q9Y168, A0A0B4LHH1, Q9VV49, Q9VMD5, Q9VVX5, P56079, A1Z9D9, Q9VPD3, Q9VV51, Q8SX37	149	59	2737	3.11341	0.216591	0.0219465	3.80061	0.169492
		KEGG_PATHWAY	WT	Fatty acid elongation	5	0.860585	0.00400144	Q9VJX8, Q9VZL3, Q9VKD2, Q9W3N1, Q9W3C7	149	13	2737	7.06505	0.226327	0.0211568	3.99139	0.384615
		KEGG_PATHWAY	WT	ECM-receptor interaction	4	0.688468	0.0185489	Q9VM97, P15215, P11584, Q8WR08	149	11	2737	6.67968	0.698288	0.0880549	17.3214	0.363636
		KEGG_PATHWAY	WT	SNARE interactions in vesicular transport	5	0.860585	0.0201801	Q9W0C2, Q24547, Q9VR90, B7Z0M0, O77434	149	20	2737	4.59228	0.728757	0.0889847	18.7068	0.25
		KEGG_PATHWAY	WT	Porphyrin and chlorophyll metabolism	7	1.20482	0.0235839	Q9W2J4, Q9VJ46, Q9W228, Q9VGT0, Q9VKZ1, Q9VGJ9, Q9VGS9	149	42	2737	3.06152	0.782912	0.096817	21.5305	0.166667
		KEGG_PATHWAY	WT	Peroxisome	9	1.54905	0.0305821	Q960W6, A8JNT1, Q8MS59, Q7K3B7, Q9VZD9, Q9W0B2, M9PF96, Q9VVT8, Q7JUN3	149	69	2737	2.39597	0.863005	0.11683	27.0601	0.130435
		KEGG_PATHWAY	WT	Ascorbate and aldarate metabolism	5	0.860585	0.0753749	Q9W2J4, Q9VJ46, Q9W228, Q9VGT0, Q9VGS9	149	30	2737	3.06152	0.993366	0.25549	54.893	0.166667
		KEGG_PATHWAY	WT	Retinol metabolism	5	0.860585	0.0830636	Q9W2J4, Q9VJ46, Q9W228, Q9VGT0, Q9VGS9	149	31	2737	2.96276	0.996112	0.265325	58.5616	0.16129
		KEGG_PATHWAY	Da5 -/-	Oxidative phosphorylation	26	5.32787	1.16724e-09	Q8SYJ2, Q6IDF5, P18930, A8DYC5, Q9VTU2, Q9VMS1, P00408, Q7JR49, P18929, Q9VQ29, Q8IML4, P00399, Q9VIQ8, Q9W3X7, Q9W2E8, Q9W141, Q9VE75, Q9VQM2, P18932, P18935, Q9VMQ6, Q9W402, Q9VHS2, Q9V3L7, Q9VGS3, Q9V3W2	127	139	2737	4.03116	6.76997e-08	6.76997e-08	1.16132e-06	0.18705
		KEGG_PATHWAY	Da5 -/-	Protein processing in endoplasmic reticulum	24	4.91803	4.44136e-09	Q7JZN0, Q9XZ53, Q9VWE9, Q9W335, Q9VFP0, Q9VMH4, Q9VS57, Q9V3A8, Q8STG9, Q76NQ0, Q8SY53, Q9VRE0, Q9VCC2, Q9VLM5, Q9VL69, Q9VL50, Q9VAL7, Q9W0M4, M9PCV1, Q24319, Q9V415, Q9W5C2, Q9VUZ0, Q7K110	127	126	2737	4.10499	2.57599e-07	1.288e-07	4.41887e-06	0.190476
		KEGG_PATHWAY	Da5 -/-	Protein export	11	2.2541	1.21365e-08	Q7JZN0, Q9VWE9, Q9VL50, Q9VYY2, Q9Y171, Q9VS57, Q8STG9, Q9VSN9, O97066, Q9VAL0, Q9VCA9	127	22	2737	10.7756	7.03915e-07	2.34638e-07	1.2075e-05	0.5
		KEGG_PATHWAY	Da5 -/-	Fatty acid metabolism	10	2.04918	8.56357e-05	Q9VZL3, Q9VKD2, A1Z7H2, A1Z784, Q9VA93, Q9W3N1, Q9VVT8, Q7JQH9, Q9W3C7, Q7K4Y0	127	42	2737	5.13123	0.00495477	0.001241	0.0851693	0.238095
		KEGG_PATHWAY	Da5 -/-	Glycerophospholipid metabolism	10	2.04918	0.00124078	A0A0B4KHK0, Q9Y168, A0A0B4LHH1, Q9VV49, Q9VVX5, P56079, A1Z9D9, Q9VPD3, Q9VV51, Q8SX37	127	59	2737	3.65274	0.0694785	0.0142988	1.22767	0.169492
		KEGG_PATHWAY	Da5 -/-	Peroxisome	10	2.04918	0.00378878	A0A0B4KHK0, Q960W6, A8JNT1, A1Z7H2, Q7K3B7, Q9VZD9, Q9W0B2, Q9VWC8, M9PF96, Q9VVT8, Q7JUN3	127	69	2737	3.12336	0.197615	0.0360294	3.70632	0.144928
		KEGG_PATHWAY	Da5 -/-	N-Glycan biosynthesis	7	1.43443	0.00527274	Q9VLM5, Q9XZ53, Q24319, Q8SY53, Q76NQ0, Q7K110, Q9VRE0	127	36	2737	4.19051	0.264076	0.0428585	5.12397	0.194444
		KEGG_PATHWAY	Da5 -/-	Metabolic pathways	56	11.4754	0.00649224	Q9VZM5, Q6IDF5, A0A0B4KEL0, A8DYC5, Q9VTU2, Q9VMS1, Q9VPD3, Q7JR61, Q9VAP0, A0A0B4LHH1, A1Z784, Q8IML4, Q9VQ29, P00399, Q9VIQ8, Q8SX37, A1Z6Z3, Q9VJ46, A1Z6Z4, Q9W141, A0A0B4KEE1, Q9VE75, Q9W3C4, P18932, Q6WV17, A1Z7H2, Q9VLM5, P18935, Q6WV19, Q9VMQ6, Q9W402, Q24319, Q9W3C7, Q9V3L7, A0A0B4KF99, Q9V3W2, Q9VGS3, Q9W2J4, Q8SYJ2, P18930, Q9XZ53, Q9VV49, A0A0C4DHC8, Q76NQ0, Q8SY53, P00408, Q7JR49, Q9V…	127	901	2737	1.33947	0.314617	0.0461246	6.2749	0.0621532
		KEGG_PATHWAY	Da5 -/-	Phagosome	10	2.04918	0.00664847	Q9VM97, Q8T0I9, Q7JZN0, Q7JR49, Q9VWE9, Q9VAL7, Q8IML4, O77434, Q8STG9, P11584, Q9VE75	127	75	2737	2.87349	0.32084	0.0420778	6.42143	0.133333
		KEGG_PATHWAY	Da5 -/-	Biosynthesis of unsaturated fatty acids	5	1.02459	0.00792465	Q9VZL3, Q9VKD2, Q9VA93, Q9W3N1, Q7K4Y0	127	18	2737	5.98644	0.369638	0.0450975	7.61071	0.277778
		KEGG_PATHWAY	Da5 -/-	Fatty acid elongation	4	0.819672	0.0194125	Q9VZL3, Q9VKD2, Q9W3N1, Q9W3C7	127	13	2737	6.63113	0.679219	0.0982008	17.7199	0.307692
		KEGG_PATHWAY	Da5 -/-	Lysosome	10	2.04918	0.0253519	Q9W3C4, Q9Y168, Q9VAD0, Q7JR49, Q7K1I4, Q8IML4, Q9VD68, A1ZAU4, Q9W3C7, Q9VE75	127	93	2737	2.31733	0.774486	0.116721	22.5461	0.107527
		KEGG_PATHWAY	Da5 -/-	ABC transporters	3	0.614754	0.0612254	Q7KVB1, Q9VWC8, M9PF96, Q7JUN3	127	9	2737	7.18373	0.974381	0.245635	46.6661	0.333333
		KEGG_PATHWAY	Da5 -/-	Fatty acid biosynthesis	3	0.614754	0.0612254	A1Z7H2, A1Z784, Q9VVT8	127	9	2737	7.18373	0.974381	0.245635	46.6661	0.333333
		KEGG_PATHWAY	Da5 -/-	ECM-receptor interaction	3	0.614754	0.0881226	Q9VM97, Q8T0I9, P15215, P11584	127	11	2737	5.87759	0.995254	0.317626	60.0613	0.272727
		KEGG_PATHWAY	Da6-/-	Oxidative phosphorylation	28	6.77966	6.46508e-13	Q8SYJ2, P18930, Q6IDF5, Q9VTU2, Q9VMS1, P00408, Q7JR49, P18929, Q9VQ29, Q8IML4, P00399, Q9VIQ8, Q9W3X7, Q9W2E8, Q9VHR9, Q9W141, P00417, Q9VQM2, Q9VE75, P18932, P18935, Q9VMQ6, Q9W402, Q9VHS2, Q9V3L7, P23380, Q9VGS3, Q9V3W2	109	139	2737	5.05815	3.6203e-11	3.6203e-11	6.38356e-10	0.201439
		KEGG_PATHWAY	Da6-/-	Protein export	9	2.17918	9.16179e-07	Q7JZN0, Q9VWE9, Q9VYY2, Q9Y171, Q9VS57, Q8STG9, Q9VSN9, O97066, Q9VCA9	109	22	2737	10.2723	5.13048e-05	2.56527e-05	0.000904666	0.409091
		KEGG_PATHWAY	Da6-/-	Protein processing in endoplasmic reticulum	19	4.60048	1.08542e-06	Q7JZN0, Q9XZ53, Q9VWE9, Q9W335, Q9V3A6, Q9VS57, Q9V3A8, Q8STG9, Q76NQ0, Q8SY53, Q9VLM5, Q9VL69, Q9VAL7, Q9W0M4, Q24319, Q9V415, Q9W5C2, Q7K110, Q9VUZ0	109	126	2737	3.78644	6.07815e-05	2.02609e-05	0.00107178	0.150794
		KEGG_PATHWAY	Da6-/-	Fatty acid metabolism	9	2.17918	0.000174739	Q9VZL3, Q9VKD2, A1Z784, Q9VA93, Q9W3N1, Q9VVT8, Q7JQH9, Q9W3C7, Q7K4Y0	109	42	2737	5.38073	0.00973849	0.00244356	0.17241	0.214286
		KEGG_PATHWAY	Da6-/-	Metabolic pathways	53	12.8329	0.000575241	Q9VZM5, Q6IDF5, A0A0B4KEL0, Q8MV48, Q9VTU2, Q9VMS1, Q9VPD3, Q9VUB9, A1Z784, Q8IML4, Q9VQ29, P00399, Q9VIQ8, Q9VJ46, Q9W141, P00417, Q9VE75, Q9W3C4, P18932, Q6WV17, Q9VLM5, P18935, Q9VMQ6, Q9W402, Q9W3C7, Q24319, Q9V3L7, Q9V3W2, Q9VGS3, Q9W2J4, Q8SYJ2, P18930, Q9XZ53, Q9VV49, Q76NQ0, Q8SY53, P00408, Q7JR49, Q9VGT0, P18929, Q9W3N1, Q9VJH8, Q7K110, Q9W3X7, Q9W2E8, P56079, Q9VV51, Q9VQM2, Q9VVT8, P32…	109	901	2737	1.47706	0.0317091	0.00642383	0.566567	0.0588235
		KEGG_PATHWAY	Da6-/-	Phagosome	11	2.66344	0.000578818	Q9VM97, Q7JZN0, Q7JR49, Q9VWE9, Q9VAL7, Q8IML4, O77434, Q8STG9, P11584, Q9VE75, P23380	109	75	2737	3.68281	0.0319032	0.00538929	0.570081	0.146667
		KEGG_PATHWAY	Da6-/-	Biosynthesis of unsaturated fatty acids	5	1.21065	0.00457306	Q9VZL3, Q9VKD2, Q9VA93, Q9W3N1, Q7K4Y0	109	18	2737	6.97503	0.226383	0.0360043	4.42507	0.277778
		KEGG_PATHWAY	Da6-/-	ECM-receptor interaction	4	0.968523	0.00782211	Q9VM97, P15215, P11584, Q8WR08	109	11	2737	9.13094	0.355809	0.0534865	7.4612	0.363636
		KEGG_PATHWAY	Da6-/-	N-Glycan biosynthesis	6	1.45278	0.0123773	Q9VLM5, Q9XZ53, Q24319, Q8SY53, Q76NQ0, Q7K110	109	36	2737	4.18502	0.502149	0.0745683	11.5719	0.166667
		KEGG_PATHWAY	Da6-/-	Fatty acid elongation	4	0.968523	0.0127998	Q9VZL3, Q9VKD2, Q9W3N1, Q9W3C7	109	13	2737	7.72618	0.513936	0.0696007	11.9447	0.307692
		KEGG_PATHWAY	Da6-/-	Glycerophospholipid metabolism	7	1.69492	0.0270389	Q9Y168, Q9VV49, Q9VVX5, P56079, A1Z9D9, Q9VPD3, Q9VV51	109	59	2737	2.97916	0.78455	0.130248	23.713	0.118644
		KEGG_PATHWAY	Da6-/-	ABC transporters	3	0.726392	0.0463322	Q7KVB1, M9PF96, A0A0B4KGI0	109	9	2737	8.37003	0.929816	0.198593	37.4021	0.333333
		KEGG_PATHWAY	Da6-/-	Lysosome	8	1.93705	0.0716469	Q9W3C4, Q9Y168, Q7JR49, Q7K1I4, Q8IML4, Q9W3C7, Q9VE75, P23380	109	93	2737	2.16001	0.984443	0.27403	52.0059	0.0860215
		KEGG_PATHWAY	Da6-/-	Metabolism of xenobiotics by cytochrome P450	6	1.45278	0.0903855	Q9W2J4, Q9VJ46, A0A0B4KEL0, Q8SY70, Q9VGT0, Q9VJH8, Q8SY19	109	61	2737	2.46985	0.995034	0.315412	60.7588	0.0983607
		KEGG_PATHWAY	Da6-/-	Drug metabolism - cytochrome P450	6	1.45278	0.0903855	Q9W2J4, Q9VJ46, A0A0B4KEL0, Q8SY70, Q9VGT0, Q9VJH8, Q8SY19	109	61	2737	2.46985	0.995034	0.315412	60.7588	0.0983607
		KEGG_PATHWAY	Da7-/-	Oxidative phosphorylation	28	6.51163	6.46508e-13	Q8SYJ2, P18930, Q6IDF5, A8DYC5, Q9VTU2, Q9VMS1, P00408, P18929, Q9VQ29, Q8IML4, P00399, Q9VIQ8, Q9W3X7, A0A0B4KEI0, Q9W2E8, Q8IQG3, Q9W141, P00417, Q9VQM2, Q9VE75, P18932, P18935, Q9W402, Q9VHS2, Q9V3L7, P23380, Q9VGS3, Q9V3W2	109	139	2737	5.05815	3.6203e-11	3.6203e-11	6.38356e-10	0.201439
		KEGG_PATHWAY	Da7-/-	Protein export	9	2.09302	9.16179e-07	Q7JZN0, Q9VWE9, Q9VYY2, Q9Y171, Q9VS57, Q8STG9, O97066, Q9VAL0, Q9VCA9	109	22	2737	10.2723	5.13048e-05	2.56527e-05	0.000904666	0.409091
		KEGG_PATHWAY	Da7-/-	Protein processing in endoplasmic reticulum	18	4.18605	5.06055e-06	Q7JZN0, Q9XZ53, Q9VWE9, Q9W335, Q9VS57, Q9V3A8, Q8STG9, Q76NQ0, Q8SY53, Q9VRE0, Q9VLM5, Q9VL69, Q9VAL7, Q9W0M4, Q24319, Q9W5C2, Q7K110, Q9VUZ0	109	126	2737	3.58716	0.000283351	9.44593e-05	0.00499686	0.142857
		KEGG_PATHWAY	Da7-/-	Metabolic pathways	55	12.7907	0.000131636	Q9VZM5, Q6IDF5, A0A0B4KEL0, Q8MV48, A8DYC5, Q9VTU2, Q9VMS1, A1ZB84, Q9VPD3, Q9VAP0, A1Z784, Q8IML4, Q9VQ29, P00399, Q9VIQ8, Q9VJ46, A0A0B4KEI0, Q8IQG3, Q9W141, P00417, Q9VE75, Q9W3C4, P18932, Q6WV17, Q9VLM5, P18935, Q9W402, Q9W3C7, Q24319, Q9V3L7, Q9V3W2, Q9VGS3, Q8SYJ2, Q9W2J4, P18930, Q9XZ53, Q9VV49, Q76NQ0, Q8SY53, P00408, P18929, Q9W3N1, Q7K110, Q9W3X7, Q9W2E8, P56079, Q9VDP5, Q9VRE0, Q9VV51,…	109	901	2737	1.5328	0.007345	0.00184133	0.129907	0.0610433
		KEGG_PATHWAY	Da7-/-	ABC transporters	5	1.16279	0.000248046	Q9VF20, Q7KVB1, M9PF96, A0A0B4KGI0, Q9VYL5	109	9	2737	13.9501	0.0137963	0.0027746	0.244661	0.555556
		KEGG_PATHWAY	Da7-/-	Phagosome	11	2.55814	0.000578818	Q9VM97, Q7JZN0, Q9VWE9, Q8IQG3, Q9VAL7, Q8IML4, O77434, Q8STG9, P11584, Q9VE75, P23380	109	75	2737	3.68281	0.0319032	0.00538929	0.570081	0.146667
		KEGG_PATHWAY	Da7-/-	N-Glycan biosynthesis	7	1.62791	0.0024331	Q9VLM5, Q9XZ53, Q24319, Q8SY53, Q76NQ0, Q7K110, Q9VRE0	109	36	2737	4.88252	0.127524	0.0192999	2.37676	0.194444
		KEGG_PATHWAY	Da7-/-	Fatty acid metabolism	7	1.62791	0.00540665	Q9VZL3, A1Z784, Q9W3N1, Q9VVT8, Q7JQH9, Q9W3C7, Q7K4Y0	109	42	2737	4.18502	0.26184	0.0372382	5.21246	0.166667
		KEGG_PATHWAY	Da7-/-	Glycerophospholipid metabolism	7	1.62791	0.0270389	Q9Y168, Q9VV49, Q9VMD5, P56079, A1Z9D9, Q9VPD3, Q9VV51	109	59	2737	2.97916	0.78455	0.156806	23.713	0.118644
		KEGG_PATHWAY	Da7-/-	ECM-receptor interaction	3	0.697674	0.0672579	Q9VM97, P15215, P11584	109	11	2737	6.84821	0.97974	0.322881	49.7177	0.272727
		KEGG_PATHWAY	Da7-/-	Lysosome	8	1.86047	0.0716469	Q9W3C4, Q9Y168, Q8IQG3, Q7K1I4, Q8IML4, Q9W3C7, Q9VE75, P23380	109	93	2737	2.16001	0.984443	0.315094	52.0059	0.0860215
		KEGG_PATHWAY	Da7-/-	Fatty acid elongation	3	0.697674	0.0906615	Q9VZL3, Q9W3N1, Q9W3C7	109	13	2737	5.79464	0.995118	0.35822	60.8762	0.230769
