# Supplementary material for: Drosophila nicotinic acetylcholine receptor subunits and their native interactions with insecticidal peptide toxins
Source: eLife. 2022 May 16;11:e74322. doi: 10.7554/eLife.74322 (PMC9110030; doi:10.7554/eLife.74322)
Supplement: Figure 6—source data 1. [file elife-74322-fig6-data1.xlsx]

## Sheet: Info
Sheet	Figure	Number of figure (short number)	Name of Figure (short name)
Sheet1	Figure 6	Fig 6B	HILIC resin flow through fractions
Sheet2	Figure 6	Fig 6C	Numbers of identified glycopeptides

## Sheet: Sheet1
Fig 6B HILIC resin flow through fractions
	Flow through fraction
Replicates	Non-glycopeptides	Glycopeptides
First	9672	29
Second	6616	20
Third	2136	4

## Sheet: Sheet2
Fig 6C Numbers of identified glycopeptides
Identified after deglycosylation with Endo H and PNGase F				143 glycopeptides with high site probability ≥ 80 %
Identified after deglycosylation with Endo H and with a high site probability
Identified after deglycosylation with Endo H and with a low site probability				254 glycopeptides with low site probability ≤ 80 %
Number	Found [N]	Confidence	Annotated Sequence	Modifications	Contaminant	Qvality PEP	Qvality q-value	# Protein Groups	# Proteins	# Isoforms	# PSMs	Master Protein Accessions	Positions in Master Proteins	Modifications in Master Proteins	# Missed Cleavages	Theo. MH+ [Da]	Abundance Ratios	Abundance Ratio Variabilities [%]	Abundances (Grouped)	Precursor Quan Result ID	Confidence (by Search Engine)	Percolator q-Value (by Search Engine)	Percolator PEP (by Search Engine)	XCorr (by Search Engine)	Top Apex RT [min]
1	1	High	[R].YLNQTNANIK.[L]	1×HexNAc [N/T]	FALSE	0.0027	0.0011	1	1	1	2	P11046	P11046 [1491-1500]		0	1381.7	0.010; 0.010	;	1928499.375; ;	1189	High	0.0008681	0.002644	2.01	41.81
	2	High	[R].YLNQTNANIK.[L]	1×HexNAc [N3(96.3)]	FALSE	0.029	0.0037	1	1	2	2	P11046	P11046 [1491-1500]	P11046 1×HexNAc [N1493(96.3)]	0	1381.7	0.010; 0.010	;	5920813.5; ;	644	High	0.002358	0.01489	1.72	41.88
	3	High	[R].YLNQTNANIK.[L]	1×HexNAc [N3(96.1)]	FALSE	0.17	0.0065	1	1	1	2	P11046	P11046 [1491-1500]	P11046 1×HexNAc [N1493(96.1)]	0	1381.7	1.59428e+06		High	High	33.09
2	1	High	[R].VQVLDETALFINK.[T]	1×HexNAc [N12(100)]	FALSE	0.011	0.0031	1	1	1	1	Q7KTA1	Q7KTA1 [113-125]	Q7KTA1 1×HexNAc [N124(100)]	0	1692.91				613	High	0.002237	0.005051	4.31
	2	High	[R].VQVLDETALFINK.[T]	1×HexNAc [N12(100)]	FALSE	0.0015	0.0065	1	1	1	2	Q7KTA1	Q7KTA1 [113-125]	Q7KTA1 1×HexNAc [N124(100)]	0	1692.91	116091		High	High	69.57
3	1	High	[R].VNNLQSIANATK.[E]	1×HexNAc [N/T/S]	FALSE	0.00057	0.0011	1	1	1	1	P11046	P11046 [1573-1584]		0	1475.77	0.010; 0.010	;	813636.375; ;	1128	High	0.0008681	0.0005855	3.03	51.58
	2	High	[R].VNNLQSIANATK.[E]	1×HexNAc [N/T/S]	FALSE	0.003	0.0031	1	1	1	3	P11046	P11046 [1573-1584]	1475.77	0.010; 0.010	;	1498431.5; ;	610		Light	0.001216	2.76	51.73
	3	High	[R].VNNLQSIANATK.[E]	1×HexNAc [N/T/S]	FALSE	0.00081	0.0065	1	1	1	7	P11046	P11046 [1573-1584]	1475.77	577793		High	High	0.001362	3.914e-05
4	1	High	[R].VLQNESHVTAGDSYYDFK.[Y]	1×HexNAc [N/S/T]	FALSE	0.0059	0.0011	1	1	1	2	Q9VJQ3	Q9VJQ3 [310-327]		0	2276.04	0.010; 0.010	;	355551.0625; ;	1112	High	0.0008681	0.005573	2	58.79
	2	High	[R].VLQNESHVTAGDSYYDFK.[Y]	1×HexNAc [N/S/T]	FALSE	0.019	0.0037	1	1	1	1	Q9VJQ3	Q9VJQ3 [310-327]		0	2276.04	0.010; 0.118	; 0.00	126356.71875; ; 14903.9765625	601	High	0.002358	0.009203	2.71	58.92
	3	High	[R].VLQNESHVTAGDSYYDFK.[Y]	1×HexNAc [N/S/T]	FALSE	0.029	0.0065	1	1	1	2	Q9VJQ3	Q9VJQ3 [310-327]		0	2276.04		NoQuanValues	High	High
5	1	High	[R].VLPPNINVTDPYAEHVQNQLK.[M]	1×HexNAc [N/T]	FALSE	0.0069	0.0011	1	1	1	1	P11046	P11046 [226-246]		0	2592.33	0.010; 0.154	; 0.00	93238.40625; ; 14381.30859375	1111	High	0.0008681	0.006461	1.68	72.39
	2	High	[R].VLPPNINVTDPYAEHVQNQLK.[M]	1×HexNAc [N/T]	FALSE	0.035	0.0037	1	1	1	1	P11046	P11046 [226-246]		0	2592.33	0.818; 0.010	0.00;	224364.625; 183540.265625;	600	High	0.002358	0.0188	2.19	72.43
	3	High	[R].VLPPNINVTDPYAEHVQNQLK.[M]	1×HexNAc [N/T]	FALSE	0.0018	0.0065	1	1	1	2	P11046	P11046 [226-246]		0	2592.33		NoQuanValues	High	High
6	1	High	[R].TGQVGELLSNNSR.[S]	1×HexNAc [S12(92)]	FALSE	0.0044	0.0011	1	2	1	1	P18173	P18173 [433-445]	P18173 1×HexNAc [S444(92)]	0	1577.78	100.000;	;	; 68527.109375;	1009	High	0.0008681	0.004239	2.21	54
	2	High	[R].TGQVGELLSNNSR.[S]	1×HexNAc [S/N/T]	FALSE	0.0012	0.0031	1	2	1	3	P18173	P18173 [433-445]		0	1577.78	0.010; 0.010	;	540395.5625; ;	555	High	0.002237	0.0004298	3.92	54.06
	3	High	[R].TGQVGELLSNNSR.[S]	1×HexNAc [S/N/T]	FALSE	0.017	0.0065	1	2	1	4	P18173	P18173 [433-445]		0	1577.78	223436		High	High	43.57
7	1	High	[R].TEFAGSGDNSSDLLLK.[S]	1×HexNAc [N/S/T]	FALSE	0.05	0.0028	1	1	1	1	Q7KTG2	Q7KTG2 [62-77]		0	1856.88	0.010; 0.010	;	122109.078125; ;	997	High	0.001999	0.04352	1.48	69.57
	2	High	[R].TEFAGSGDNSSDLLLK.[S]	1×HexNAc [N/S/T]	FALSE	0.009	0.0031	1	1	1	2	Q7KTG2	Q7KTG2 [62-77]		0	1856.88				544	High	0.002237	0.00412	2.32
8	1	High	[R].NNGSCLYVPPGIFK.[S]	1×Carbamidomethyl [C5]; 1×HexNAc [N/S]	FALSE	0.054	0.0037	1	4	1	1	Q9VWI9	Q9VWI9 [169-182]		0	1768.86				399	High	0.002358	0.03025	2.88
9	1	High	[R].NGTVTSPAFGLADYPK.[N]	1×HexNAc [N1(98.2)]	FALSE	0.0013	0.0011	1	2	1	1	E1JHA6	E1JHA6 [447-462]	E1JHA6 1×HexNAc [N447(98.2)]	0	1840.9	0.010; 0.010	;	248249.375; ;	732	High	0.0008681	0.001321	2.71	73.39
	2	High	[R].NGTVTSPAFGLADYPK.[N]	1×HexNAc [N/T/S]	FALSE	5.2e-05	0.0031	1	2	1	3	E1JHA6	E1JHA6 [447-462]		0	1840.9	0.010; 0.010	;	574900.3125; ;	369	High	0.002237	1.317e-05	3.84	73.58
10	1	High	[R].NGTAIAGEFLDSIR.[N]	1×HexNAc [N1(94.7)]	FALSE	0.047	0.0037	1	1	1	1	Q9VK00	Q9VK00 [53-66]	Q9VK00 1×HexNAc [N53(94.7)]	0	1666.83				364	High	0.002358	0.02604	3.28
	2	High	[R].NGTAIAGEFLDSIR.[N]	1×HexNAc [N1(94.4)]	FALSE	0.073	0.0065	1	1	1	2	Q9VK00	Q9VK00 [53-66]	Q9VK00 1×HexNAc [N53(94.4)]	0	1666.83		NoQuanValues	High	High
11	1	High	[R].NEVNVQVNQNVSK.[V]	1×HexNAc [N8(96.6)]	FALSE	0.0032	0.0031	1	1	1	1	Q9VFC9	Q9VFC9 [127-139]	Q9VFC9 1×HexNAc [N134(96.6)]	0	1674.83	0.010; 0.010	;	132747.546875; ;	360	High	0.002237	0.001278	3.29	44.63
12	1	High	[R].NAANVYGGNTTTPASDVTTVR.[V]	1×HexNAc [T/S/N]	FALSE	0.00053	0.0011	1	3	1	2	Q7KTJ7	Q7KTJ7 [573-593]		0	2312.1	0.010; 0.010	;	100949.234375; ;	709	High	0.0008681	0.0005464	2.77	57.5
	2	High	[R].NAANVYGGNTTTPASDVTTVR.[V]	1×HexNAc [S15(98.2)]	FALSE	0.00099	0.0065	1	3	2	8	Q8IPG9	Q8IPG9 [198-218]	Q8IPG9 1×HexNAc [S212(98.2)]	0	2312.1	379576		High	High	46.51
13	1	High	[R].LSPENINQALNQTR.[N]	1×HexNAc [N11(100)]	FALSE	3.9e-05	0.0011	1	2	1	3	Q9VKM7	Q9VKM7 [643-656]	Q9VKM7 1×HexNAc [N653(100)]	0	1800.91	0.010; 0.026	; 0.00	1023583.25; ; 27116.908203125	666	High	0.0008681	4.492e-05	3.96	64.94
	2	High	[R].LSPENINQALNQTR.[N]	1×HexNAc [N11(100)]	FALSE	9.3e-05	0.0031	1	2	1	6	Q9VKM7	Q9VKM7 [643-656]	Q9VKM7 1×HexNAc [N653(100)]	0	1800.91	0.010; 0.010	; 0.00	2983687.125; ; 23284.36328125	326	High	0.002237	2.529e-05	4.01	65.25
	3	High	[R].LSPENINQALNQTR.[N]	1×HexNAc [N11(100)]	FALSE	0.00048	0.0065	1	2	1	14	Q9VKM7	Q9VKM7 [643-656]	Q9VKM7 1×HexNAc [N653(100)]	0	1800.91	844920		High	High	52.84
14	1	High	[R].LLTEQNNSLLLR.[N]	1×HexNAc [N/S/T]	FALSE	0.014	0.0011	1	1	1	1	P10333	P10333 [133-144]		0	1616.89	0.010; 0.010	;	74568.984375; ;	612	High	0.0008681	0.01325	1.64	69.39
	2	High	[R].LLTEQNNSLLLR.[N]	1×HexNAc [N/S/T]	FALSE	0.0024	0.0031	1	1	1	3	P10333	P10333 [133-144]		0	1616.89	0.010; 0.010	;	451489.40625; ;	291	High	0.002237	0.0009285	3.62	69.56
	3	High	[R].LLTEQNNSLLLR.[N]	1×HexNAc [N/S/T]	FALSE	0.0013	0.0065	1	1	1	6	P10333	P10333 [133-144]		0	1616.89	331206		High	High	57.46
15	1	High	[R].LIPGNANTFPNSSLTR.[V]	1×HexNAc [S/T/N]	FALSE	0.00027	0.0031	1	2	1	1	Q0E8V8	Q0E8V8 [127-142]		0	1904.97	0.010; 0.010	;	167735.296875; ;	288	High	0.002237	8.39e-05	2.64	66.33
	2	High	[R].LIPGNANTFPNSSLTR.[V]	1×HexNAc [S/T/N]	FALSE	0.0047	0.0065	1	2	1	2	Q0E8V8	Q0E8V8 [127-142]		0	1904.97	120819		High	High	53.97
16	1	High	[R].LALNNNSTDLAYK.[F]	1×HexNAc [N/S/T]	FALSE	0.036	0.0065	1	1	1	2	M9NFY9	M9NFY9 [59-71]		0	1639.82	76790.5		High	High	48.22
17	1	High	[R].IPDSAINATSERPNYEAK.[N]	1×HexNAc [N7(93.4)]	FALSE	0.0071	0.0011	1	2	1	1	E1JHA6	E1JHA6 [1311-1328]	E1JHA6 1×HexNAc [N1317(93.4)]	0	2179.05	0.010; 0.010	;	405281.375; ;	624	High	0.0008681	0.006699	2.84	50.61
	2	High	[R].IPDSAINATSERPNYEAK.[N]	1×HexNAc [N7(94.3)]	FALSE	0.0014	0.0031	1	2	1	1	E1JHA6	E1JHA6 [1311-1328]	E1JHA6 1×HexNAc [N1317(94.3)]	0	2179.05	0.010; 0.010	;	165823.0625; ;	308	High	0.002237	0.0005319	3.49	50.77
18	1	High	[R].GVLVSNSTDAGDKLSPK.[Q]	1×HexNAc [S/T/N]	FALSE	0.0027	0.0011	1	1	1	1	P12080	P12080 [954-970]		1	1890.97	0.010; 0.010	;	86655.4765625; ;	451	High	0.0008681	0.002621	4.05	49.18
19	1	High	[R].FTGQPSNVTGQAK.[V]	1×HexNAc [N/T/S]	FALSE	0.0013	0.0011	1	2	1	1	Q8SXR1	Q8SXR1 [90-102]		0	1537.75	0.010; 0.010	;	1284600.375; ;	334	High	0.0008681	0.00127	2.44	40.05
	2	High	[R].FTGQPSNVTGQAK.[V]	1×HexNAc [N/T/S]	FALSE	0.017	0.0037	1	2	1	2	Q8SXR1	Q8SXR1 [90-102]		0	1537.75	0.010; 0.010	;	2176820.25; ;	157	High	0.002358	0.008228	2.93	40.06
20	1	High	[R].FTGQPSNVTGQAK.[V]	1×HexNAc [N/T/S]	FALSE	0.029	0.0065	1	2	1	3	Q8SXR1	Q8SXR1 [90-102]	1537.75	939688		High	High	0.001362	0.005146
21	1	High	[R].ASVNLTAIR.[E]	1×HexNAc [N4(98.7)]	FALSE	0.021	0.0011	1	1	2	3	Q9U4G1	Q9U4G1 [108-116]	Q9U4G1 1×HexNAc [N111(98.7)]	0	1147.63	0.010; 0.010	;	1075286.125; ;	123	High	0.0008681	0.01892	1.79	55.59
	2	High	[R].ASVNLTAIR.[E]	1×HexNAc [N4(97.2)]	FALSE	0.071	0.0037	1	1	1	1	Q9U4G1	Q9U4G1 [108-116]	Q9U4G1 1×HexNAc [N111(97.2)]	0	1147.63	0.010; 0.010	;	319802.5; ;	53	High	0.002358	0.04141	1.6	55.69
	3	High	[R].ASVNLTAIR.[E]	1×HexNAc [N/T/S]	FALSE	0.099	0.0065	1	1	1	3	Q9U4G1	Q9U4G1 [108-116]		0	1147.63	152043		High	High	44.46
22	1	High	[K].YTNYSAVQETAR.[K]	1×HexNAc [N3(94.9)]	FALSE	0.012	0.0031	1	1	2	3	Q9VW34	Q9VW34 [244-255]	Q9VW34 1×HexNAc [N246(94.9)]	0	1605.74	0.010; 0.010	;	808597.3125; ;	662	High	0.002237	0.005433	2.27	45.94
	2	High	[K].YTNYSAVQETAR.[K]	1×HexNAc [N/S/T]	FALSE	0.077	0.0065	1	1	1	2	Q9VW34	Q9VW34 [244-255]		0	1605.74		NoQuanValues	High	High
23	1	High	[K].YSNLIAQNVSK.[C]	1×HexNAc [N/S]	FALSE	0.0025	0.0031	1	1	1	3	A1Z6H7	A1Z6H7 [1564-1574]		0	1439.74	0.010; 0.010	;	1513346.375; ;	658	High	0.002237	0.0009959	3.19	51.02
24	2	High	[K].YILAQDSVDNNFTIIGQLTNGK.[L]	1×HexNAc [S/N/T]	FALSE	0.21	0.0065	1	1	1	1	Q9V496	Q9V496 [2812-2833]		0	2627.32		NoQuanValues	High	High
25	1	High	[K].VYNGSAEAPYTNPK.[A]	1×HexNAc [N/S/T]	FALSE	0.0024	0.0011	1	1	1	1	Q9VZ58	Q9VZ58 [359-372]		0	1713.8	0.010; 0.010	;	280855.3125; ;	1166	High	0.0008681	0.002381	1.7	46.13
	2	High	[K].VYNGSAEAPYTNPK.[A]	1×HexNAc [N/S/T]	FALSE	0.0055	0.0031	1	1	1	3	Q9VZ58	Q9VZ58 [359-372]		0	1713.8	0.010; 0.010	;	436322.4375; ;	630	High	0.002237	0.002354	2.63	46.25
	3	High	[K].VYNGSAEAPYTNPK.[A]	1×HexNAc [N/S/T]	FALSE	0.037	0.0065	1	1	1	4	Q9VZ58	Q9VZ58 [359-372]		0	1713.8	178249		High	High	37.06
26	1	High	[K].VINETKTEER.[Q]	1×HexNAc [N/T]	FALSE	0.033	0.0019	1	1	1	1	B5RIR1	B5RIR1 [209-218]		1	1421.71	0.010; 0.010	;	121097.2890625; ;	1109	High	0.001448	0.02963	1.66	26.4
	2	High	[K].VINETKTEER.[Q]	1×HexNAc [T7(97.7)]	FALSE	0.034	0.0037	1	1	1	1	B5RIR1	B5RIR1 [209-218]	B5RIR1 1×HexNAc [T215(97.7)]	1	1421.71	0.010; 0.010	;	454715.875; ;	597	High	0.002358	0.0182	2.25	26.44
	3	High	[K].VINETKTEER.[Q]	1×HexNAc [N/T]	FALSE	0.13	0.0065	1	1	1	5	B5RIR1	B5RIR1 [209-218]		1	1421.71	151636		High	High	21.26
27	1	High	[K].TFVNQSSDR.[Y]	1×HexNAc [N/S/T]	FALSE	0.11	0.0049	1	1	1	1	A1Z7M8	A1Z7M8 [28-36]		0	1256.58	0.010; 0.010	;	82579.5078125; ;	550	High	0.003064	0.06614	1.26	34.36
28	2	High	[K].TCANSTEGSVLLR.[K]	1×Carbamidomethyl [C2]; 1×HexNAc [N/S/T]	FALSE	0.17	0.0089	1	1	1	1	Q95RA9	Q95RA9 [154-166]		0	1610.77	0.010; 0.010	;	52206.7890625; ;	538	High	0.005401	0.1133	1.12	52.8
29	1	High	[K].SVTPQGNATHPK.[G]	1×HexNAc [N/T/S]	FALSE	0.042	0.0019	1	1	1	1	Q9VY04	Q9VY04 [193-204]		0	1439.71	0.010; 0.010	;	36450.25390625; ;	978	High	0.001448	0.03732	1.72	26.02
	2	High	[K].SVTPQGNATHPK.[G]	1×HexNAc [N/T/S]	FALSE	0.061	0.0037	1	1	1	1	Q9VY04	Q9VY04 [193-204]		0	1439.71	0.010; 0.010	;	265047.78125; ;	532	High	0.002358	0.03498	1.57	26.07
	3	High	[K].SVTPQGNATHPK.[G]	1×HexNAc [N/T/S]	FALSE	0.1	0.0065	1	1	1	2	Q9VY04	Q9VY04 [193-204]		0	1439.71	298237		High	High	20.43
30	1	High	[K].SNTSINIDQLLK.[L]	1×HexNAc [S/N/T]	FALSE	0.0013	0.0065	1	1	2	4	E2QCS7	E2QCS7 [291-302]		0	1548.81	768072		High	High	64.72
31	1	High	[K].SGADNITVINPQGVR.[S]	1×HexNAc [S/N/T]	FALSE	0.19	0.0089	1	5	1	1	Q9VZ96	Q9VZ96 [1747-1761]		0	1743.89				492	High	0.005401	0.1289	1.32
32	1	High	[K].SAAIQNVTVTK.[F]	1×HexNAc [N/T/S]	FALSE	0.00068	0.0011	1	6	1	1	Q9VNP2	Q9VNP2 [246-256]		0	1334.72	100.000;	;	; 66484.8125;	859	High	0.0008681	0.0006995	2.06	43.8
	2	High	[K].SAAIQNVTVTK.[F]	1×HexNAc [N/T/S]	FALSE	0.0065	0.0031	1	6	1	1	Q9VNP2	Q9VNP2 [246-256]		0	1334.72	0.010; 0.010	;	353154.625; ;	476	High	0.002237	0.002854	2.5	43.98
	3	High	[K].SAAIQNVTVTK.[F]	1×HexNAc [N/T/S]	FALSE	0.0051	0.0065	1	6	1	3	Q9VNP2	Q9VNP2 [246-256]		0	1334.72	382719		High	High	35.08
33	1	High	[K].QVNQTLANAFDIR.[E]	1×HexNAc [N/T]	FALSE	0.0012	0.0011	1	1	1	4	Q00174	Q00174 [2194-2206]		0	1692.86	0.010; 0.010	;	457282.1875; ;	845	High	0.0008681	0.001174	3	74.69
	2	High	[K].QVNQTLANAFDIR.[E]	1×HexNAc [N/T]	FALSE	0.0053	0.0031	1	1	2	7	Q00174	Q00174 [2194-2206]		0	1692.86	0.010; 0.010	;	1285941.875; ;	464	High	0.002237	0.002273	3.52	74.79
	3	High	[K].QVNQTLANAFDIR.[E]	1×HexNAc [N/T]	FALSE	0.007	0.0065	1	1	2	4	Q00174	Q00174 [2194-2206]		0	1692.86		NoQuanValues	High	High
34	1	High	[K].QPNDTTFDVNK.[N]	1×HexNAc [N10(93.6)]	FALSE	0.011	0.0011	1	1	1	2	Q9VN14	Q9VN14 [367-377]	Q9VN14 1×HexNAc [N376(93.6)]	0	1481.68	0.010; 0.010	;	404111.125; ;	825	High	0.0008681	0.01029	2.07	46.68
	2	High	[K].QPNDTTFDVNK.[N]	1×HexNAc [N10(94.9)]	FALSE	0.019	0.0037	1	1	2	3	Q9VN14	Q9VN14 [367-377]	Q9VN14 1×HexNAc [N376(94.9)]	0	1481.68	0.010; 0.015	; 0.00	813217.3125; ; 12500.9521484375	449	High	0.002358	0.009319	2.21	46.84
	3	High	[K].QPNDTTFDVNK.[N]	1×HexNAc [N/T]	FALSE	0.0093	0.0065	1	1	2	6	Q9VN14	Q9VN14 [367-377]		0	1481.68	275742		High	High	36.78
35	1	High	[K].NSTQESLDLHRK.[Y]	1×HexNAc [N/S/T]	FALSE	0.0056	0.0011	1	1	1	3	P08171	P08171 [420-431]		1	1630.8	0.010; 0.010	;	168706.6171875; ;	772	High	0.0008681	0.005256	2.66	33.76
	2	High	[K].NSTQESLDLHRK.[Y]	1×HexNAc [T/S/N]	FALSE	0.00084	0.0031	1	1	2	7	P08171	P08171 [420-431]		1	1630.8	0.010; 0.010	;	1109369.03125; ;	414	High	0.002237	0.0002912	3.55	33.75
	3	High	[K].NSTQESLDLHRK.[Y]	1×HexNAc [T/S/N]	FALSE	0.0019	0.0065	1	1	2	22	P08171	P08171 [420-431]		1	1630.8	643149		High	High	35.32
36	1	High	[K].NSNANASDALEILK.[N]	1×HexNAc [N/S]	FALSE	0.00018	0.0011	1	1	1	2	Q00174	Q00174 [2565-2578]		0	1662.82	0.010; 0.010	;	1105964; ;	766	High	0.0008681	0.0001935	3.96	69.09
	2	High	[K].NSNANASDALEILK.[N]	1×HexNAc [N/S]	FALSE	0.0068	0.0031	1	1	1	4	Q00174	Q00174 [2565-2578]		0	1662.82	0.010; 0.010	;	869002.875; ;	410	High	0.002237	0.003008	3.56	69.32
	3	High	[K].NSNANASDALEILK.[N]	1×HexNAc [N5(97.2)]	FALSE	0.00035	0.0065	1	1	2	8	Q00174	Q00174 [2565-2578]	Q00174 1×HexNAc [N2569(97.2)]	0	1662.82	674465		High	High	56.73
37	1	High	[K].NGTAVTDVPSLR.[G]	1×HexNAc [N1(96.4)]	FALSE	0.0026	0.0011	1	3	2	4	Q7KTJ7	Q7KTJ7 [442-453]	Q7KTJ7 1×HexNAc [N442(96.4)]	0	1432.73	0.010; 0.010	;	833098.875; ;	731	High	0.0008681	0.002574	2.42	57.36
	2	High	[K].NGTAVTDVPSLR.[G]	1×HexNAc [N1(98.3)]	FALSE	0.006	0.0031	1	3	2	4	Q8IPG9	Q8IPG9 [67-78]	Q8IPG9 1×HexNAc [N67(98.3)]	0	1432.73	0.010; 0.010	;	1111230.12890625; ;	365	High	0.002237	0.0026	2.21	57.55
	3	High	[K].NGTAVTDVPSLR.[G]	1×HexNAc [N1(98.3)]	FALSE	0.002	0.0065	1	3	2	7	Q8IPG9	Q8IPG9 [67-78]	Q8IPG9 1×HexNAc [N67(98.3)]	0	1432.73	909337		High	High	46.58
38	1	High	[K].LTNITFSGPQFTNLNER.[I]	1×HexNAc [T2(98.9)]	FALSE	6.1e-06	0.0011	1	5	2	4	A0A0B4KHG5	A0A0B4KHG5 [1110-1126]	A0A0B4KHG5 1×HexNAc [T1111(98.9)]	0	2155.07	0.010; 0.010	;	1663838; ;	675	High	0.0008681	7.383e-06	4.59	79.78
	2	High	[K].LTNITFSGPQFTNLNER.[I]	1×HexNAc [T2(98.9)]	FALSE	0.00013	0.0031	1	5	1	6	A0A0B4KHG5	A0A0B4KHG5 [1110-1126]	A0A0B4KHG5 1×HexNAc [T1111(98.9)]	0	2155.07	0.010; 0.010	;	6562662.5; ;	333	High	0.002237	3.622e-05	5.32	79.97
	3	High	[K].LTNITFSGPQFTNLNER.[I]	1×HexNAc [T2(99.1)]	FALSE	0.002	0.0065	1	5	1	9	A0A0B4KHG5	A0A0B4KHG5 [1110-1126]	A0A0B4KHG5 1×HexNAc [T1111(99.1)]	0	2155.07	506671		High	High	65.68
39	1	High	[K].LSQDAISAAGNATDKTDGIEER.[A]	1×HexNAc [N/T/S]	FALSE	0.00069	0.0011	1	1	1	1	Q00174	Q00174 [2472-2493]		1	2465.16	0.010; 0.010	;	51375.55859375; ;	667	High	0.0008681	0.0007077	3.08	54.92
40	1	High	[K].LPPLEAGEYNLTAEGVK.[G]	1×HexNAc [N/T]	FALSE	0.00043	0.0011	1	4	2	2	Q9VIT9	Q9VIT9 [89-105]		0	2004.02	0.010; 0.010	;	238763.953125; ;	629	High	0.0008681	0.0004455	3.23	76.81
	2	High	[K].LPPLEAGEYNLTAEGVK.[G]	1×HexNAc [T12(99.1)]	FALSE	0.0001	0.0031	1	4	2	3	Q9VIT9	Q9VIT9 [89-105]	Q9VIT9 1×HexNAc [T100(99.1)]	0	2004.02	0.010; 0.010	;	276644.84375; ;	311	High	0.002237	2.857e-05	4.69	76.93
	3	High	[K].LPPLEAGEYNLTAEGVK.[G]	1×HexNAc [N/T]	FALSE	0.007	0.0065	1	4	1	2	Q9VIT9	Q9VIT9 [89-105]		0	2004.02		NoQuanValues	High	High
41	1	High	[K].LNASEAYEK.[A]	1×HexNAc [N/S]	FALSE	0.011	0.0011	1	1	1	4	P11046	P11046 [1472-1480]		0	1227.57	0.010; 0.010	;	1637104.75; ;	617	High	0.0008681	0.009848	1.81	38.91
	2	High	[K].LNASEAYEK.[A]	1×HexNAc [N/S]	FALSE	0.04	0.0037	1	1	1	3	P11046	P11046 [1472-1480]		0	1227.57	0.010; 0.010	;	6428495; ;	293	High	0.002358	0.02148	2.19	38.93
	3	High	[K].LNASEAYEK.[A]	1×HexNAc [N/S]	FALSE	0.011	0.0065	1	1	2	8	P11046	P11046 [1472-1480]		0	1227.57	1.47307e+06		High	High	31.08
42	1	High	[K].KNGTAVTDVPSLR.[G]	1×HexNAc [N/T/S]	FALSE	0.0045	0.0031	1	3	2	3	Q8IPG9	Q8IPG9 [66-78]		1	1560.82	0.010; 0.010	;	977366.90625; ;	229	High	0.002237	0.001872	3.64	48.14
43	1	High	[K].IYNWIPEIYNDSK.[T]	1×HexNAc [N/S]	FALSE	0.0053	0.0065	1	2	2	15	M9PDX8	M9PDX8 [188-200]		0	1857.89	1.93562e+06		High	High	73.98
	2	High	[K].IYNWIPEIYNDSK.[T]	1×HexNAc [S12(98.7)]	FALSE	0.0095	0.0031	1	2	1	3	M9PDX8	M9PDX8 [188-200]	M9PDX8 1×HexNAc [S199(98.7)]	0	1857.89	0.010; 0.029	; 0.00	1655968.15625; ; 48063.984375	346	High	0.002237	0.004359	3.63	88.47
44	1	High	[K].IYNWIPEIYNDSK.[T]	1×HexNAc [N/S]	FALSE	0.00067	0.0011	1	2	1	4	M9PDX8	M9PDX8 [188-200]	1857.89	0.010; 0.010	;	2469506.71875; ;	691		Light	0.0006828	3.51	88.33
	2	High	[K].IYNWIPEIYNDSK.[T]	1×HexNAc [N/S]	FALSE	0.00067	0.0011	1	2	1	4	M9PDX8	M9PDX8 [188-200]	1857.89	0.010; 0.010	;	2469506.71875; ;	691		Light	0.0006828	3.51	88.33
45	1	High	[K].IYGWIPEYYNR.[S]	1×HexNAc [N10(100)]	FALSE	0.00015	0.0011	1	2	1	5	A4V0B5	A4V0B5 [197-207]	A4V0B5 1×HexNAc [N206(100)]	0	1676.8	0.010; 0.010	; 0.00	1363747.703125; ; 8475.080078125	689	High	0.0008681	0.0001638	3.09	82.31
	2	High	[K].IYGWIPEYYNR.[S]	1×HexNAc [N10(100)]	FALSE	0.013	0.0031	1	2	1	3	A4V0B5	A4V0B5 [197-207]	A4V0B5 1×HexNAc [N206(100)]	0	1676.8	0.010; 0.010	;	1577762.25; ;	344	High	0.002237	0.006206	3.08	82.48
	3	High	[K].IYGWIPEYYNR.[S]	1×HexNAc [N10(100)]	FALSE	0.0032	0.0065	1	2	1	10	A4V0B5	A4V0B5 [197-207]	A4V0B5 1×HexNAc [N206(100)]	0	1676.8	383703		High	High	67.48
46	1	High	[K].ISAVNNATEHQLK.[D]	1×HexNAc [N/T/S]	FALSE	0.0029	0.0011	1	1	1	2	Q00174	Q00174 [2533-2545]		0	1627.83	0.010; 0.010	;	485368.125; ;	652	High	0.0008681	0.002821	2.2	38.49
	2	High	[K].ISAVNNATEHQLK.[D]	1×HexNAc [N/T/S]	FALSE	0.0021	0.0031	1	1	1	3	Q00174	Q00174 [2533-2545]	1627.83	0.010; 0.010	;	1516103.875; ;	319		Light	0.0008266	3.87	38.47
	3	High	[K].ISAVNNATEHQLK.[D]	1×HexNAc [N/T/S]	FALSE	0.00081	0.0065	1	1	1	11	Q00174	Q00174 [2533-2545]	1627.83	1.2468e+06		High	High	0.001362	3.911e-05
	4	High	[K].ISAVNNATEHQLK.[D]	1×HexNAc [N/T/S]	FALSE	0.0021	0.0031	1	1	1	3	Q00174	Q00174 [2533-2545]	1627.83	0.010; 0.010	;	1516103.875; ;	319		Light	0.0008266	3.87	38.47
	5	High	[K].ISAVNNATEHQLK.[D]	1×HexNAc [N/T/S]	FALSE	0.00081	0.0065	1	1	1	11	Q00174	Q00174 [2533-2545]	1627.83	1.2468e+06		High	High	0.001362	3.911e-05
47	1	High	[K].IINGTTQK.[V]	1×HexNAc [N/T]	FALSE	0.065	0.0037	1	2	1	1	Q8IMC1	Q8IMC1 [202-209]		0	1077.58	0.010; 0.010	;	539170.3125; ;	285	High	0.002358	0.03705	1.19	27.57
48	1	High	[K].GFVNVTSNDPNAFK.[L]	1×HexNAc [N11(93.2)]	FALSE	0.00057	0.0011	1	1	2	5	Q9V3U6	Q9V3U6 [442-455]	Q9V3U6 1×HexNAc [N452(93.2)]	0	1712.81	0.010; 0.010	;	2069206; ;	367	High	0.0008681	0.0005875	3.35	64.75
	2	High	[K].GFVNVTSNDPNAFK.[L]	1×HexNAc [N/T/S]	FALSE	0.0023	0.0031	1	1	1	4	Q9V3U6	Q9V3U6 [442-455]		0	1712.81	0.010; 0.010	;	1710619.875; ;	170	High	0.002237	0.0009009	3.13	65.05
	3	High	[K].GFVNVTSNDPNAFK.[L]	1×HexNAc [N/T/S]	FALSE	0.022	0.0065	1	1	1	6	Q9V3U6	Q9V3U6 [442-455]		0	1712.81	427371		High	High	52.82
49	1	High	[K].EALNPDWSTAYNR.[S]	1×HexNAc [N12(99.9)]	FALSE	0.018	0.0037	1	5	1	1	P34082	P34082 [565-577]	P34082 1×HexNAc [N576(99.9)]	0	1739.79				106	High	0.002358	0.008613	2.52
50	1	High	[K].DGLNTVQEGLQKLNETFLQAPAAST.[-]	1×HexNAc [S/T/N]	FALSE	0.11	0.0065	1	1	1	1	Q9VU58	Q9VU58 [62-86]		1	2848.42		NoQuanValues	High	High
Number	Sample_name	Confidence	Annotated Sequence	Modifications	Contaminant	Qvality PEP	Qvality q-value	# Protein Groups	# Proteins	# Isoforms	# PSMs	Master Protein Accessions	Positions in Master Proteins	Modifications in Master Proteins	# Missed Cleavages	Theo. MH+ [Da]	Abundance Ratios	Abundance Ratio Variabilities [%]	Abundances (Grouped)	Precursor Quan Result ID	Confidence (by Search Engine)	Percolator q-Value (by Search Engine)	Percolator PEP (by Search Engine)	XCorr (by Search Engine)	Top Apex RT [min]
1	1	High	[RK].HVNPINGTITEK.[H]	1×HexNAc [N6(98.9)]	FALSE	0.00025	0.0031	1	3	2	5	Q9VAL7	Q9VAL7 [213-224]	Q9VAL7 1×HexNAc [N218(98.9)]	0	1525.79	0.010; 0.010	;	2835677.625; ;	216	High	0.002237	7.568e-05	3.61	44.09
	2	High	[RK].HVNPINGTITEK.[H]	1×HexNAc [N/T]	FALSE	0.017	0.0011	1	3	1	2	Q9VAL7	Q9VAL7 [213-224]	1525.79	0.010; 0.010	;	519982.015625; ;	474		Light	0.01505	1.81	44.01
	3	High	[RK].HVNPINGTITEK.[H]	1×HexNAc [N/T]	FALSE	0.06	0.0065	1	3	2	5	Q9VAL7	Q9VAL7 [213-224]	1525.79	439664		High	High	0.001362	0.01421
2	1	High	[R].YGGTNITGFR.[L]	1×HexNAc [N5(97.8)]	FALSE	0.023	0.0037	1	1	2	3	Q9VDH5	Q9VDH5 [258-267]	Q9VDH5 1×HexNAc [N262(97.8)]	0	1288.62	0.010; 0.010	;	1497930.625; ;	641	High	0.002358	0.01163	2.44	55.43
	2	High	[R].YGGTNITGFR.[L]	1×HexNAc [N/T]	FALSE	0.0065	0.0011	1	1	2	2	Q9VDH5	Q9VDH5 [258-267]	1288.62	0.010; 0.010	;	591591.125; ;	1186		Light	0.006083	1.15	55.34
3	1	High	[R].YFNGTFDFK.[W]	1×HexNAc [N3(98.3)]	FALSE	0.15	0.0089	1	1	1	1	Q9VLT3	Q9VLT3 [481-489]	Q9VLT3 1×HexNAc [N483(98.3)]	0	1341.6	0.010; 0.010	;	922170.6875; ;	640	High	0.005401	0.09948	2.03	74.51
	2	High	[R].YFNGTFDFK.[W]	1×HexNAc [N/T]	FALSE	0.094	0.007	1	1	1	1	Q9VLT3	Q9VLT3 [481-489]	1341.6	0.010; 0.010	;	97541.7578125; ;	1184		Light	0.08077	1.05	74.4
4	1	High	[R].YANNTNETYTFHGPPGSEENPGPIK.[F]	2×HexNAc [N3(91.9); T/N/S]	FALSE	6e-05	0.0031	1	1	1	2	Q8IN49	Q8IN49 [242-266]	Q8IN49 2×HexNAc [N244(91.9); T/N/S]	0	3140.4	0.010; 0.010	;	191734.65625; ;	635	High	0.002237	1.554e-05	5.09	59.84
5	1	High	[R].VRNISLDIR.[Y]	1×HexNAc [N3(98.4)]	FALSE	0.077	0.0055	1	5	2	3	A0A0B4KHG5	A0A0B4KHG5 [1159-1167]	A0A0B4KHG5 1×HexNAc [N1161(98.4)]	1	1288.72	0.010; 0.010	;	2032248; ;	1145	High	0.003829	0.06661	1.49	53.01
	2	High	[R].VRNISLDIR.[Y]	1×HexNAc [N3(98.7)]	FALSE	0.018	0.0037	1	5	2	9	A0A0B4KHG5	A0A0B4KHG5 [1159-1167]	A0A0B4KHG5 1×HexNAc [N1161(98.7)]	1	1288.72	0.010; 0.019	0.00; 0.00	13120207.2382813; 15732.4072265625; 252331.671875	617	High	0.002358	0.009142	2.1	52.93
	3	High	[R].VRNISLDIR.[Y]	1×HexNAc [N3(98.8)]	FALSE	0.21	0.0065	1	5	2	13	A0A0B4KHG5	A0A0B4KHG5 [1159-1167]	A0A0B4KHG5 1×HexNAc [N1161(98.8)]	1	1288.72	1.43551e+06		High	High	44.65
6	1	High	[R].VNATVQSPNCAQFPELDR.[L]	1×Carbamidomethyl [C10]; 1×HexNAc [N2(99.9)]	FALSE	0.00034	0.0031	1	1	2	2	P33438	P33438 [114-131]	P33438 1×HexNAc [N115(99.9)]	0	2249.05	0.010; 0.010	;	84984.171875; ;	608	High	0.002237	0.0001058	3.34	69.26
	2	High	[R].VNATVQSPNCAQFPELDR.[L]	1×Carbamidomethyl [C10]; 1×HexNAc [N/T/S]	FALSE	0.042	0.0019	1	1	1	1	P33438	P33438 [114-131]	2249.05	0.010; 0.010	;	91205.1875; ;	1125		Light	0.0366	1.51	69.03
	3	High	[R].VNATVQSPNCAQFPELDR.[L]	1×Carbamidomethyl [C10]; 1×HexNAc [N/T/S]	FALSE	0.042	0.0019	1	1	1	1	P33438	P33438 [114-131]	2249.05	0.010; 0.010	;	91205.1875; ;	1125		Light	0.0366	1.51	69.03
7	1	High	[R].VMANFTSGLPVR.[G]	1×Oxidation [M2]; 1×HexNAc [N4(96.4)]	FALSE	0.097	0.0049	1	1	1	1	Q9VLT3	Q9VLT3 [351-362]	Q9VLT3 1×HexNAc [N354(96.4)]	0	1510.76				607	High	0.003064	0.05883	1.63
	2	High	[R].VMANFTSGLPVR.[G]	1×Oxidation [M2]; 1×HexNAc [N/T/S]	FALSE	0.022	0.0011	1	1	1	1	Q9VLT3	Q9VLT3 [351-362]		0	1510.76	0.010; 0.010	;	226036.71875; ;	1123	High	0.0008681	0.02004	1.04	65.33
	3	High	[R].VMANFTSGLPVR.[G]	1×HexNAc [N/T/S]	FALSE	0.0048	0.0011	1	1	1	1	Q9VLT3	Q9VLT3 [351-362]	1494.76				1122	NoQuanValues	Light	0.004588	1.52
8	1	High	[R].TTLVDNNTWNNSHIALVGK.[A]	1×HexNAc [N10(97)]	FALSE	2.2e-05	0.0031	1	1	2	2	Q9XZ53	Q9XZ53 [570-588]	Q9XZ53 1×HexNAc [N579(97)]	0	2300.15	0.010; 0.010	;	1410711.625; ;	574	High	0.002237	5.139e-06	6.48	69.24
9	1	High	[R].TTEPSGFLLYLGNDNK.[T]	1×HexNAc [N15(98.5)]	FALSE	0.0025	0.0011	1	1	1	1	Q00174	Q00174 [2706-2721]	Q00174 1×HexNAc [N2720(98.5)]	0	1971.95	0.010; 0.010	;	105454.0703125; ;	1050	High	0.0008681	0.002457	2.56	86.74
10	1	High	[R].TINETGAIYR.[C]	1×HexNAc [N3(97.1)]	FALSE	0.026	0.0037	1	1	2	2	O44386	O44386 [80-89]	O44386 1×HexNAc [N82(97.1)]	0	1340.67	0.010; 0.010	;	408707.59375; ;	563	High	0.002358	0.01334	2.23	49.37
	2	High	[R].TINETGAIYR.[C]	1×HexNAc [N/T]	FALSE	0.14	0.0098	1	1	1	1	O44386	O44386 [80-89]	1340.67	0.010; 0.010	;	107799.9140625; ;	1024		Light	0.1155	0.95	49.19
	3	High	[R].TINETGAIYR.[C]	1×HexNAc [N/T]	FALSE	0.084	0.0065	1	1	1	4	O44386	O44386 [80-89]	1340.67	154357		High	High	0.001362	0.02262
11	1	High	[R].SLYSWNTSR.[H]	1×HexNAc [N6(96.2)]	FALSE	0.012	0.0011	1	1	1	1	Q9VKZ7	Q9VKZ7 [66-74]	Q9VKZ7 1×HexNAc [N71(96.2)]	0	1316.61				916	High	0.0008681	0.01143	1.32
	2	High	[R].SLYSWNTSR.[H]	1×HexNAc [N6(98.2)]	FALSE	0.013	0.0031	1	1	1	3	Q9VKZ7	Q9VKZ7 [66-74]	Q9VKZ7 1×HexNAc [N71(98.2)]	0	1316.61	0.010; 0.010	;	383298.03125; ;	502	High	0.002237	0.00626	2.4	59.85
12	1	High	[R].RLDIYLDTNGNR.[S]	1×HexNAc [N11(97.9)]	FALSE	0.039	0.0037	1	1	1	2	Q7KTG2	Q7KTG2 [1155-1166]	Q7KTG2 1×HexNAc [N1165(97.9)]	1	1652.82	0.010; 0.010	;	47251.89453125; ;	472	High	0.002358	0.02082	1.9	59.73
13	1	High	[R].QVTWHGRGDYLATVMPEGANR.[S]	1×HexNAc [N20(85.6)]	FALSE	0.089	0.007	1	1	1	1	Q7K0Y1	Q7K0Y1 [577-597]	Q7K0Y1 1×HexNAc [N596(85.6)]	1	2561.22	0.010; 0.202	; 0.00	51565.58984375; ; 10394.1728515625	847	High	0.004802	0.07665	1.5	29.17
14	1	High	[R].QNYTILDQITENAKK.[E]	1×HexNAc [N2(98.4)]	FALSE	1.8e-05	0.0031	1	1	2	4	P15215	P15215 [1155-1169]	P15215 1×HexNAc [N1156(98.4)]	1	1982.01	0.010; 0.010	;	923808.125; ;	448	High	0.002237	4.089e-06	5.81	69.9
15	1	High	[R].NQTHILENTLTNR.[I]	1×HexNAc [N8(91.7)]	FALSE	0.0044	0.0031	1	4	1	1	M9PFD6	M9PFD6 [136-148]	M9PFD6 1×HexNAc [N143(91.7)]	0	1756.88	0.010; 0.010	;	89996.890625; ;	408	High	0.002237	0.001828	2.54	53.22
16	1	High	[R].NISVTPIPPNR.[G]	1×HexNAc [N1(97.8)]	FALSE	0.058	0.0037	1	1	3	5	Q09101	Q09101 [525-535]	Q09101 1×HexNAc [N525(97.8)]	0	1410.76	0.010; 0.010	;	145701.296875; ;	383	High	0.002358	0.03321	1.82	57.84
	2	High	[R].NISVTPIPPNR.[G]	1×HexNAc [N10(99.9)]	FALSE	0.19	0.0065	1	1	2	2	Q09101	Q09101 [525-535]	Q09101 1×HexNAc [N534(99.9)]	0	1410.76	177681		High	High	46.34
	3	High	[R].NISVTPIPPNR.[G]	1×HexNAc [N/S/T]	FALSE	0.075	0.0055	1	1	1	2	Q09101	Q09101 [525-535]	1410.76	0.010; 0.010	;	84513.10546875; ;	747		Light	0.06498	1.05	57.59
17	1	High	[R].NHIAGGLNANLSAACR.[M]	1×Carbamidomethyl [C15]; 1×HexNAc [N1(99.9)]	FALSE	0.0038	0.0031	1	1	1	1	Q9VY18	Q9VY18 [71-86]	Q9VY18 1×HexNAc [N71(99.9)]	0	1841.89	0.010; 0.010	;	55718.80078125; ;	371	High	0.002237	0.001576	2.82	52.05
18	1	High	[R].NATAIYANADYR.[K]	1×HexNAc [N1(98.7)]	FALSE	0.002	0.0031	1	5	2	3	A8JV19	A8JV19 [713-724]	A8JV19 1×HexNAc [N713(98.7)]	0	1545.72	0.010; 0.036	; 0.00	627856.125; ; 22293.7578125	352	High	0.002237	0.0007592	2.87	53.5
	2	High	[R].NATAIYANADYR.[K]	1×HexNAc [N/T]	FALSE	0.013	0.0011	1	5	1	2	A8JV19	A8JV19 [713-724]	1545.72	0.010; 0.010	;	284774.78125; ;	714		Light	0.01192	1.76	53.36
19	1	High	[R].LLKDIPLENCTKEDSFLR.[D]	1×Carbamidomethyl [C10]; 1×HexNAc [N9(95.7)]	FALSE	0.019	0.0037	1	6	1	1	Q8MLQ5	Q8MLQ5 [303-320]	Q8MLQ5 1×HexNAc [N311(95.7)]	2	2394.22	0.010; 0.010	;	80284.5390625; ;	282	High	0.002358	0.009428	2.89	70.65
20	1	High	[R].LGEHNIDVLEGNEQFINAAK.[I]	1×HexNAc [N17(100)]	TRUE	3e-07	0.0011	1	1	1	1	cRAP112	cRAP112 [58-77]	cRAP112 1×HexNAc [N74(100)]	0	2414.18	0.010; 0.010	;	445897.5; ;	561	High	0.0008681	4.147e-07	6.26	73.75
	2	High	[R].LGEHNIDVLEGNEQFINAAK.[I]	1×HexNAc [N17(100)]	TRUE	0.007	0.0031	1	1	1	1	cRAP112	cRAP112 [58-77]	cRAP112 1×HexNAc [N74(100)]	0	2414.18				262	High	0.002237	0.003108	4.55
21	1	High	[R].ISYKNATNNLK.[G]	1×HexNAc [N9(92.2)]	FALSE	0.11	0.0085	1	1	1	1	Q7KTG2	Q7KTG2 [2654-2664]	Q7KTG2 1×HexNAc [N2662(92.2)]	1	1468.76	0.010; 0.010	;	103667.96875; ;	671	High	0.005784	0.09817	1.66	40.27
	2	High	[R].ISYKNATNNLK.[G]	1×HexNAc [N9(98.3)]	FALSE	0.031	0.0037	1	1	1	2	Q7KTG2	Q7KTG2 [2654-2664]	Q7KTG2 1×HexNAc [N2662(98.3)]	1	1468.76	0.010; 0.010	;	277700.5; ;	329	High	0.002358	0.01659	2.07	40.23
22	1	High	[R].HNCTEPEICGCSK.[G]	3×Carbamidomethyl [C3; C9; C11]; 1×HexNAc [N2(97.7)]	FALSE	0.022	0.0037	1	1	1	1	Q9VJU6	Q9VJU6 [224-236]	Q9VJU6 1×HexNAc [N225(97.7)]	0	1794.71	0.010; 0.010	;	784289.0625; ;	210	High	0.002358	0.01109	2.04	35.42
23	1	High	[R].GPYFVKQPNDTTFDVNK.[N]	1×HexNAc [N16(94)]	FALSE	0.004	0.0011	1	1	1	1	Q9VN14	Q9VN14 [361-377]	Q9VN14 1×HexNAc [N376(94)]	1	2173.04	0.010; 0.010	;	69369.0625; ;	421	High	0.0008681	0.003863	3.03	62.47
	2	High	[R].GPYFVKQPNDTTFDVNK.[N]	1×HexNAc [N16(94.7)]	FALSE	0.0008	0.0031	1	1	2	2	Q9VN14	Q9VN14 [361-377]	Q9VN14 1×HexNAc [N376(94.7)]	1	2173.04	0.010; 0.010	;	151039.453125; ;	200	High	0.002237	0.0002766	4.07	62.66
24	1	High	[R].GINGTSYVGSR.[F]	1×HexNAc [N3(94.9)]	FALSE	0.014	0.0031	1	1	2	2	P15425	P15425 [66-76]	P15425 1×HexNAc [N68(94.9)]	0	1313.63	0.010; 0.010	;	733783.5; ;	191	High	0.002237	0.006711	1.84	43.71
	2	High	[R].GINGTSYVGSR.[F]	1×HexNAc [N/T/S]	FALSE	0.0018	0.0011	1	1	1	2	P15425	P15425 [66-76]	1313.63	0.010; 0.010	;	986472; ;	405		Light	0.0018	1.87	43.58
	3	High	[R].GINGTSYVGSR.[F]	1×HexNAc [N/T/S]	FALSE	0.1	0.0065	1	1	1	5	P15425	P15425 [66-76]	1313.63	202010		High	High	0.001362	0.02889
25	1	High	[R].GHNVTVINTFGSDKNEPNFR.[V]	1×HexNAc [N3(97.7)]	FALSE	0.0014	0.0031	1	1	1	1	Q9VGS9	Q9VGS9 [60-79]	Q9VGS9 1×HexNAc [N62(97.7)]	1	2449.17	0.010; 0.010	;	44596.43359375; ;	184	High	0.002237	0.0005021	3.08	59.16
26	1	High	[R].GGNWSVSYIPK.[C]	1×HexNAc [N3(98.1)]	FALSE	0.052	0.0037	1	2	1	1	E1JHA6	E1JHA6 [598-608]	E1JHA6 1×HexNAc [N600(98.1)]	0	1410.69	0.010; 0.010	;	398060.78125; ;	176	High	0.002358	0.02887	2.08	66.89
27	1	High	[R].GCAVDLDNATR.[N]	1×Carbamidomethyl [C2]; 1×HexNAc [N8(98.6)]	FALSE	0.0063	0.0031	1	2	2	3	Q9W3F3	Q9W3F3 [64-74]	Q9W3F3 1×HexNAc [N71(98.6)]	0	1394.62	0.010; 0.010	;	412563.09375; ;	162	High	0.002237	0.002769	2.15	46.57
28	1	High	[R].FSQPAQNQTQLHDGTASFTR.[T]	1×HexNAc [N7(97.2)]	FALSE	0.071	0.0037	1	4	1	1	Q9VYN8	Q9VYN8 [2299-2318]	Q9VYN8 1×HexNAc [N2305(97.2)]	0	2437.14	0.010; 0.010	;	106175.203125; ;	156	High	0.002358	0.04144	2.63	52.39
29	1	High	[R].DVYTSVFNR.[S]	1×HexNAc [N8(98.1)]	FALSE	0.012	0.0011	1	4	1	1	Q9VYN8	Q9VYN8 [2771-2779]	Q9VYN8 1×HexNAc [N2778(98.1)]	0	1303.62	0.010; 0.010	;	69916.6171875; ;	217	High	0.0008681	0.01072	1.52	70.86
	1	High	[R].DVYTSVFNR.[S]	1×HexNAc [N8(100)]	FALSE	0.039	0.0037	1	4	1	1	Q9VYN8	Q9VYN8 [2771-2779]	Q9VYN8 1×HexNAc [N2778(100)]	0	1303.62	0.010; 0.326	; 0.00	94618.890625; ; 30832.791015625	102	High	0.002358	0.02113	2.57	71.06
30	1	High	[R].DTNGNISTSNMNAVR.[D]	1×Oxidation [M11]; 1×HexNAc [N12(82.9)]	FALSE	0.026	0.0019	1	1	1	1	Q76NQ0	Q76NQ0 [283-297]	Q76NQ0 1×HexNAc [N294(82.9)]	0	1812.8	0.010; 0.010	;	33173.14453125; ;	207	High	0.001448	0.02311	1.95	39.05
	2	High	[R].DTNGNISTSNMNAVR.[D]	1×HexNAc [T/N/S]	FALSE	0.083	0.0063	1	1	1	1	Q76NQ0	Q76NQ0 [283-297]		0	1796.81	0.010; 0.010	;	163966.75; ;	208	High	0.004375	0.0714	1.25	49.95
	3	High	[R].DTNGNISTSNMNAVR.[D]	1×Oxidation [M11]; 1×HexNAc [T/N/S]	FALSE	0.089	0.0037	1	1	1	1	Q76NQ0	Q76NQ0 [283-297]	1812.8	0.010; 0.010	;	35473.51171875; ;	95		Light	0.05315	1.06	39.08
	4	High	[R].DTNGNISTSNMNAVR.[D]	1×HexNAc [T/N/S]	FALSE	0.1	0.0049	1	1	1	1	Q76NQ0	Q76NQ0 [283-297]	1796.81	0.010; 0.010	;	124687.140625; ;	94		Light	0.06077	1.74	50.13
31	1	High	[R].DNVTITCGSPGR.[Q]	1×Carbamidomethyl [C7]; 1×HexNAc [N2(98.2)]	FALSE	0.0022	0.0011	1	2	1	2	E1JHA6	E1JHA6 [1138-1149]	E1JHA6 1×HexNAc [N1139(98.2)]	0	1479.67	0.010; 0.154	; 0.00	209800.40625; ; 32268.294921875	191	High	0.0008681	0.002119	2.16	45.41
	2	High	[R].DNVTITCGSPGR.[Q]	1×Carbamidomethyl [C7]; 1×HexNAc [N2(98.5)]	FALSE	0.013	0.0031	1	2	2	2	E1JHA6	E1JHA6 [1138-1149]	E1JHA6 1×HexNAc [N1139(98.5)]	0	1479.67	0.010; 0.010	;	191235.3125; ;	88	High	0.002237	0.006024	2.29	45.52
32	1	High	[R].ARQNYTILDQITENAK.[K]	1×HexNAc [N4(98.3)]	FALSE	0.0081	0.0031	1	1	2	2	P15215	P15215 [1153-1168]	P15215 1×HexNAc [N1156(98.3)]	1	2081.05	0.010; 0.010	;	108899.2578125; ;	49	High	0.002237	0.003669	5.03	69.53
33	1	High	[R].ARGEANNLQSATSATNQTLTDR.[A]	1×HexNAc [N16(93.6)]	FALSE	0.00049	0.0011	1	1	1	1	P11046	P11046 [1688-1709]	P11046 1×HexNAc [N1703(93.6)]	1	2522.21	0.010; 0.010	;	123072.15625; ;	112	High	0.0008681	0.0005105	4.62	50.14
	2	High	[R].ARGEANNLQSATSATNQTLTDR.[A]	1×HexNAc(1)dHex(1) [T/N/S]	FALSE	0.019	0.0037	1	1	1	1	P11046	P11046 [1688-1709]	2668.27	0.010; 0.422	; 0.00	141092.09375; ; 59585.01953125	48		Light	0.009211	2.89	50.22
	3	High	[R].ARGEANNLQSATSATNQTLTDR.[A]	1×HexNAc [N/T/S]	FALSE	7.9e-05	0.0031	1	1	1	1	P11046	P11046 [1688-1709]	2522.21	0.010; 0.010	;	551709.75; ;	47		Light	2.121e-05	5.82	50.2
34	1	High	[K].YFDTVNR.[T]	1×HexNAc [N6(100)]	FALSE	0.0076	0.0011	1	5	1	8	A0A0B4KHG5	A0A0B4KHG5 [293-299]	A0A0B4KHG5 1×HexNAc [N298(100)]	0	1117.52	0.010; 0.010	0.00; 0.00	17841596.328125; 10147.443359375; 21674.130859375	1182	High	0.0008681	0.007131	2.2	45.9
	2	High	[K].YFDTVNR.[T]	1×HexNAc [N6(100)]	FALSE	0.062	0.0037	1	5	2	8	A0A0B4KHG5	A0A0B4KHG5 [293-299]	A0A0B4KHG5 1×HexNAc [N298(100)]	0	1117.52	0.010; 0.010	;	6021048.33203125; ;	639	High	0.002358	0.03534	1.73	46.03
	3	High	[K].YFDTVNR.[T]	1×HexNAc [N6(100)]	FALSE	0.076	0.0065	1	5	1	10	A0A0B4KHG5	A0A0B4KHG5 [293-299]	A0A0B4KHG5 1×HexNAc [N298(100)]	0	1117.52	6.71074e+06		High	High	36.35
35	1	High	[K].YDDAWYHVEANR.[T]	1×HexNAc [N11(100)]	FALSE	0.00056	0.0031	1	3	1	1	Q8IP51	Q8IP51 [2472-2483]	Q8IP51 1×HexNAc [N2482(100)]	0	1741.75				637	High	0.002237	0.0001862	2.95
36	1	High	[K].TTAYNLLGEPLLLNR.[T]	1×HexNAc [N14(100)]	FALSE	0.0063	0.0031	1	7	1	1	Q9VGE9	Q9VGE9 [449-463]	Q9VGE9 1×HexNAc [N462(100)]	0	1891.02				573	High	0.002237	0.002739	4.2
37	1	High	[K].TPLQLGVNR.[T]	1×HexNAc [N8(100)]	FALSE	0.079	0.0055	1	3	1	1	Q9W490	Q9W490 [438-446]	Q9W490 1×HexNAc [N445(100)]	0	1200.66	0.010; 0.010	;	62873.78125; ;	1033	High	0.003829	0.06781	1.16	54.45
	2	High	[K].TPLQLGVNR.[T]	1×HexNAc [N8(100)]	FALSE	0.031	0.0037	1	3	1	1	Q9W490	Q9W490 [438-446]	Q9W490 1×HexNAc [N445(100)]	0	1200.66	0.010; 0.928	; 0.00	155178.4375; ; 143944.0625	568	High	0.002358	0.01638	2.08	54.54
38	1	High	[K].QNQVNCSFEHPPQDDK.[V]	1×Carbamidomethyl [C6]; 1×HexNAc [N2(97.3)]	FALSE	0.0026	0.0031	1	2	2	2	M9PDX8	M9PDX8 [139-154]	M9PDX8 1×HexNAc [N140(97.3)]	0	2145.91	0.010; 0.010	;	171710.421875; ;	447	High	0.002237	0.001048	3.88	42.38
39	1	High	[K].LNDSNWHK.[V]	1×HexNAc [N5(97)]	FALSE	0.028	0.0037	1	3	1	1	P10040	P10040 [1099-1106]	P10040 1×HexNAc [N1103(97)]	0	1216.56	0.010; 0.010	;	279993.25; ;	295	High	0.002358	0.01433	1.45	32.79
40	1	High	[K].LGLENISLSTVPEIR.[L]	1×HexNAc [N5(95)]	FALSE	0.0041	0.0031	1	5	2	6	A0A0B4KHG5	A0A0B4KHG5 [922-936]	A0A0B4KHG5 1×HexNAc [N926(95)]	0	1844	0.010; 0.010	;	7459421.5; ;	265	High	0.002237	0.001695	3.42	89.03
	2	High	[K].LGLENISLSTVPEIR.[L]	1×HexNAc [N/S/T]	FALSE	0.0008	0.0065	1	5	3	11	A0A0B4KHG5	A0A0B4KHG5 [922-936]	1844	829696		High	High	0.001362	3.859e-05
41	1	High	[K].KEDTVLESVCVNPIIANR.[T]	1×Carbamidomethyl [C10]; 1×HexNAc [N17(100)]	FALSE	0.011	0.0031	1	4	1	1	O76268	O76268 [288-305]	O76268 1×HexNAc [N304(100)]	1	2260.15	0.010; 0.221	; 0.00	136038.8125; ; 30023.521484375	224	High	0.002237	0.005157	4.64	73.77
42	1	High	[K].IGTWNSTLPDGINFTR.[T]	2×HexNAc [N13(97.3); N/S/T]	FALSE	0.01	0.0031	1	1	1	1	Q9VDH5	Q9VDH5 [385-400]	Q9VDH5 2×HexNAc [N397(97.3); N/S/T]	0	2198.06				271	High	0.002237	0.004592	3.37
43	1	High	[K].HCSVCNR.[T]	2×Carbamidomethyl [C2; C5]; 1×HexNAc [N6(100)]	FALSE	0.13	0.0064	1	2	1	1	R9PY60	R9PY60 [88-94]	R9PY60 1×HexNAc [N93(100)]	0	1135.46	0.010; 0.575	; 0.00	39796.8984375; ; 22884.896484375	209	High	0.003949	0.08498	1.41	20.77
44	1	High	[K].GNVTFTQNDCGQNVHVR.[V]	1×Carbamidomethyl [C10]; 1×HexNAc [N2(94.3)]	FALSE	0.0018	0.0011	1	2	1	1	A1Z8K9	A1Z8K9 [45-61]	A1Z8K9 1×HexNAc [N46(94.3)]	0	2148.97	0.010; 0.010	;	144757.96875; ;	417	High	0.0008681	0.001754	3.65	46.5
	2	High	[K].GNVTFTQNDCGQNVHVR.[V]	1×Carbamidomethyl [C10]; 1×HexNAc [N2(100)]	FALSE	4.5e-05	0.0031	1	2	2	4	A1Z8K9	A1Z8K9 [45-61]	A1Z8K9 1×HexNAc [N46(100)]	0	2148.97	0.010; 0.010	;	1597387.875; ;	199	High	0.002237	1.113e-05	5.5	46.62
45	1	High	[K].GNFSENCPK.[D]	1×Carbamidomethyl [C7]; 1×HexNAc [N6(96.8)]	FALSE	0.1	0.0049	1	3	2	2	Q8T3W8	Q8T3W8 [38-46]	Q8T3W8 1×HexNAc [N43(96.8)]	0	1255.53	0.010; 0.010	;	795148.375; ;	193	High	0.003064	0.06256	1.85	32.4
46	1	High	[K].GIAQVLANR.[T]	1×HexNAc [N8(100)]	FALSE	0.0039	0.0011	1	1	1	4	P08171	P08171 [449-457]	P08171 1×HexNAc [N456(100)]	0	1144.63	0.010; 0.010	;	960381.5625; ;	400	High	0.0008681	0.003703	2.61	57.48
	2	High	[K].GIAQVLANR.[T]	1×HexNAc [N8(100)]	FALSE	0.0097	0.0031	1	1	1	2	P08171	P08171 [449-457]	P08171 1×HexNAc [N456(100)]	0	1144.63	0.010; 0.010	;	282584.125; ;	186	High	0.002237	0.004433	2.4	57.59
	3	High	[K].GIAQVLANR.[T]	1×HexNAc [N8(100)]	FALSE	0.021	0.0065	1	1	1	7	P08171	P08171 [449-457]	P08171 1×HexNAc [N456(100)]	0	1144.63	320056		High	High	46.4
47	1	High	[K].GFDPYHLPDVNR.[T]	1×HexNAc [N11(100)]	FALSE	0.039	0.0019	1	1	1	1	Q9VQR0	Q9VQR0 [263-274]	Q9VQR0 1×HexNAc [N273(100)]	0	1632.77	0.010; 0.010	;	22606.03125; ;	365	High	0.001448	0.03469	1.82	67.64
	2	High	[K].GFDPYHLPDVNR.[T]	1×HexNAc [N11(100)]	FALSE	0.022	0.0037	1	1	1	1	Q9VQR0	Q9VQR0 [263-274]	Q9VQR0 1×HexNAc [N273(100)]	0	1632.77	0.314; 0.010	0.00;	36280.90234375; 11382.0205078125;	169	High	0.002358	0.01092	2.08	67.73
48	1	High	[K].GCGSDGFQNR.[S]	1×Carbamidomethyl [C2]; 1×HexNAc [N9(100)]	FALSE	0.018	0.0011	1	1	1	1	Q868Z9	Q868Z9 [411-420]	Q868Z9 1×HexNAc [N419(100)]	0	1300.52	0.231; 0.010	0.00;	92618.8359375; 21361.328125;	354	High	0.0008681	0.01636	2.12	31.72
	2	High	[K].GCGSDGFQNR.[S]	1×Carbamidomethyl [C2]; 1×HexNAc [N9(100)]	FALSE	0.01	0.0031	1	1	1	2	Q868Z9	Q868Z9 [411-420]	Q868Z9 1×HexNAc [N419(100)]	0	1300.52	0.010; 0.010	;	881361.9375; ;	163	High	0.002237	0.004621	3.2	31.39
49	1	High	[K].FSGNRSDEFGLIGNER.[Q]	1×HexNAc [N4(96.9)]	FALSE	0.00064	0.0031	1	1	2	3	Q9W2L6	Q9W2L6 [147-162]	Q9W2L6 1×HexNAc [N150(96.9)]	1	2000.93	0.010; 0.010	;	281891.71875; ;	153	High	0.002237	0.0002151	3.63	61.94
50	1	High	[K].EINVNPVFPNR.[T]	1×HexNAc [N10(100)]	FALSE	0.00062	0.0011	1	1	1	3	Q8IN49	Q8IN49 [72-82]	Q8IN49 1×HexNAc [N81(100)]	0	1501.76	0.010; 0.010	;	365023.375; ;	270	High	0.0008681	0.0006359	2.76	67.06
	2	High	[K].EINVNPVFPNR.[T]	1×HexNAc [N10(100)]	FALSE	0.004	0.0031	1	1	1	3	Q8IN49	Q8IN49 [72-82]	Q8IN49 1×HexNAc [N81(100)]	0	1501.76	0.010; 0.010	;	1262042.375; ;	128	High	0.002237	0.001658	3.6	67.34
	3	High	[K].EINVNPVFPNR.[T]	1×HexNAc [N10(100)]	FALSE	0.023	0.0065	1	1	1	6	Q8IN49	Q8IN49 [72-82]	Q8IN49 1×HexNAc [N81(100)]	0	1501.76	564135		High	High	55.05
51	1	High	[K].EDTVLESVCVNPIIANR.[T]	1×Carbamidomethyl [C9]; 1×HexNAc [N16(99.9)]	FALSE	0.0035	0.0011	1	4	1	1	O76268	O76268 [289-305]	O76268 1×HexNAc [N304(99.9)]	0	2132.05				232	High	0.0008681	0.003349	1.56
52	1	High	[K].DYEAYLKNNSEVIGNR.[L]	1×HexNAc [N15(95.3)]	FALSE	0.0031	0.0031	1	1	1	2	Q7JRC3	Q7JRC3 [49-64]	Q7JRC3 1×HexNAc [N63(95.3)]	1	2087.99	0.010; 0.010	;	351702.25; ;	103	High	0.002237	0.001244	4.33	65.09
	2	High	[K].DYEAYLKNNSEVIGNR.[L]	1×HexNAc [N/S]	FALSE	0.016	0.0011	1	1	1	2	Q7JRC3	Q7JRC3 [49-64]	2087.99	0.010; 0.010	;	363079.46875; ;	219		Light	0.0145	1.99	64.75
53	1	High	[K].DTQGVFNATAFNK.[M]	1×HexNAc [N7(96.5)]	FALSE	0.0029	0.0031	1	3	2	3	Q9VIJ0	Q9VIJ0 [258-270]	Q9VIJ0 1×HexNAc [N264(96.5)]	0	1615.76	0.010; 0.010	;	167545.453125; ;	97	High	0.002237	0.001173	2.93	68.17
	2	High	[K].DTQGVFNATAFNK.[M]	1×HexNAc [N7(97)]	FALSE	0.0064	0.0065	1	3	2	4	Q9VIJ0	Q9VIJ0 [258-270]	Q9VIJ0 1×HexNAc [N264(97)]	0	1615.76	112146		High	High	55.37
	3	High	[K].DTQGVFNATAFNK.[M]	1×HexNAc [N/T]	FALSE	0.0017	0.0011	1	3	1	1	Q9VIJ0	Q9VIJ0 [258-270]	1615.76	0.010; 0.010	;	154232.390625; ;	210		Light	0.001673	1.39	67.92
	4	High	[K].DTQGVFNATAFNK.[M]	1×HexNAc [N/T]	FALSE	0.0017	0.0011	1	3	1	1	Q9VIJ0	Q9VIJ0 [258-270]	1615.76	0.010; 0.010	;	154232.390625; ;	210		Light	0.001673	1.39	67.92
54	1	High	[K].DIPLENCTKEDSFLR.[D]	1×Carbamidomethyl [C7]; 1×HexNAc [N6(95.8)]	FALSE	0.032	0.0037	1	6	1	1	Q8MLQ5	Q8MLQ5 [306-320]	Q8MLQ5 1×HexNAc [N311(95.8)]	1	2039.96	0.010; 0.010	;	205995.96875; ;	83	High	0.002358	0.01681	2.34	70.18
	2	High	[K].DIPLENCTKEDSFLR.[D]	1×Carbamidomethyl [C7]; 1×HexNAc [N/T/S]	FALSE	0.022	0.0011	1	6	1	1	Q8MLQ5	Q8MLQ5 [306-320]	2039.96	0.010; 0.010	;	267588.53125; ;	180		Light	0.01969	1.61	70
55	1	High	[K].CQNLTVAIER.[D]	1×Carbamidomethyl [C1]; 1×HexNAc [N3(98.5)]	FALSE	0.012	0.0031	1	1	2	2	Q9VTZ5	Q9VTZ5 [46-55]	Q9VTZ5 1×HexNAc [N48(98.5)]	0	1406.69	0.010; 0.010	;	579797.75; ;	67	High	0.002237	0.005887	1.88	55.45
	2	High	[K].CQNLTVAIER.[D]	1×Carbamidomethyl [C1]; 1×HexNAc [N/T]	FALSE	0.0096	0.0011	1	1	1	1	Q9VTZ5	Q9VTZ5 [46-55]	1406.69	0.010; 0.010	;	102352.8515625; ;	145		Light	0.008871	1.37	55.32
56	1	High	[K].CGPSLTGGVCYCKPGQSLAPDNR.[T]	3×Carbamidomethyl [C1; C10; C12]; 1×HexNAc [N22(100)]	FALSE	0.091	0.0049	1	1	1	1	A8JTM7	A8JTM7 [426-448]	A8JTM7 1×HexNAc [N447(100)]	0	2697.21				64	High	0.003064	0.05454	1.8
57	1	High	[K].ANYTYGKPVNGK.[V]	1×HexNAc [N10(97.2)]	FALSE	0.0015	0.0031	1	4	2	3	Q9VIT9	Q9VIT9 [271-282]	Q9VIT9 1×HexNAc [N280(97.2)]	0	1514.75	0.010; 0.010	;	773256.21875; ;	41	High	0.002237	0.0005556	3.39	34.14
	2	High	[K].ANYTYGKPVNGK.[V]	1×HexNAc [N/T]	FALSE	0.046	0.0028	1	4	1	2	Q9VIT9	Q9VIT9 [271-282]	1514.75	0.010; 0.010	;	141631.34375; ;	93		Light	0.04086	1.87	34.12
58	1	High	[K].AINFTLEVDEPNCYK.[W]	1×Carbamidomethyl [C13]; 1×HexNAc [N3(96.7)]	FALSE	0.0082	0.0031	1	1	1	1	A1Z6H7	A1Z6H7 [37-51]	A1Z6H7 1×HexNAc [N39(96.7)]	0	2015.93				29	High	0.002237	0.003716	3.16
59	1	High	[R].ENIPLLNR.[Q]	1×HexNAc [N7(100)]	FALSE	0.22	0.0065	1	1	1	2	Q9VK04	Q9VK04 [17-24]	Q9VK04 1×HexNAc [N23(100)]	0	1171.63	212717		High	High	45.88
60	1	High	[K].FNFTQR.[G]	1×HexNAc [N2(98.9)]	FALSE	0.13	0.0065	1	1	3	5	Q9VCI4	Q9VCI4 [414-419]	Q9VCI4 1×HexNAc [N415(98.9)]	0	1015.48	356586		High	High	39.44
61	1	High	[K].INATGPNVVR.[V]	1×HexNAc [N2(96.4)]	FALSE	0.093	0.0065	1	1	2	4	Q9VHF7	Q9VHF7 [90-99]	Q9VHF7 1×HexNAc [N91(96.4)]	0	1243.66	474618		High	High	34.65
	2	High	[K].INATGPNVVR.[V]	1×HexNAc [N/T]	FALSE	0.12	0.0049	1	1	1	1	Q9VHF7	Q9VHF7 [90-99]	1243.66	0.010; 0.010	;	212985.15625; ;	294		Light	0.0773	0.99	43.53
62	1	High	[R].WYPVANMSR.[Y]	1×Oxidation [M7]; 1×HexNAc [S8(97.8)]	FALSE	0.12	0.0091	1	1	1	1	Q9VLT3	Q9VLT3 [1670-1678]	Q9VLT3 1×HexNAc [S1677(97.8)]	0	1342.61	0.010; 0.010	;	127961.4765625; ;	1172	High	0.006194	0.1055	1.2	52.92
63	1	High	[R].TNLSTYFR.[T]	1×HexNAc [T1(98.4)]	FALSE	0.1	0.0078	1	1	2	2	Q00174	Q00174 [2698-2705]	Q00174 1×HexNAc [T2698(98.4)]	0	1204.58	0.010; 0.010	;	231537.859375; ;	1030	High	0.005332	0.08802	1.51	64.1
	2	High	[R].TNLSTYFR.[T]	1×HexNAc [T1(98.4)]	FALSE	0.039	0.0065	1	1	2	5	Q00174	Q00174 [2698-2705]	Q00174 1×HexNAc [T2698(98.4)]	0	1204.58	122298		High	High	51.39
	3	High	[R].TNLSTYFR.[T]	1×HexNAc [T1(98.4)]	FALSE	0.049	0.0037	1	1	2	2	Q00174	Q00174 [2698-2705]	Q00174 1×HexNAc [T2698(98.4)]	0	1204.58	0.010; 0.010	;	454709.46875; ;	565	High	0.002358	0.02747	2.33	64.33
64	1	High	[R].TFNLTFR.[S]	1×HexNAc [T5(97.6)]	FALSE	0.13	0.0091	1	1	1	1	Q9VF33	Q9VF33 [1240-1246]	Q9VF33 1×HexNAc [T1244(97.6)]	0	1101.56				1002	High	0.006194	0.1091	0.9
	2	High	[R].TFNLTFR.[S]	1×HexNAc [T5(98.6)]	FALSE	0.11	0.0049	1	1	1	1	Q9VF33	Q9VF33 [1240-1246]	Q9VF33 1×HexNAc [T1244(98.6)]	0	1101.56				548	High	0.003064	0.07009	1.62
65	1	High	[R].SSYKDPVANLTK.[W]	1×HexNAc [T11(98.5)]	FALSE	0.1	0.0049	1	1	1	1	Q0KI00	Q0KI00 [151-162]	Q0KI00 1×HexNAc [T161(98.5)]	1	1525.77	100.000;	;	; 41736.65625;	525	High	0.003064	0.06292	1.8	47.31
	2	High	[R].SSYKDPVANLTK.[W]	1×HexNAc [N/T/S]	FALSE	0.13	0.0091	1	1	1	1	Q0KI00	Q0KI00 [151-162]	1525.77	0.010; 0.010	;	64169.19921875; ;	962		Light	0.1073	1.63	47.24
66	1	High	[R].SNWTALEIGHR.[G]	2×HexNAc [S1(98.6); N/T]	FALSE	0.039	0.0037	1	1	1	1	Q9W2L6	Q9W2L6 [340-350]	Q9W2L6 2×HexNAc [S340(98.6); N/T]	0	1689.81	0.010; 0.010	;	22087.0703125; ;	507	High	0.002358	0.02104	1.5	61.86
	2	High	[R].SNWTALEIGHR.[G]	1×HexNAc(1)dHex(1) [S/N/T]	FALSE	0.011	0.0031	1	1	1	1	Q9W2L6	Q9W2L6 [340-350]	1632.79	0.010; 0.010	;	97266.6796875; ;	506		Light	0.005365	2.41	59.95
	3	High	[R].SNWTALEIGHR.[G]	1×HexNAc [S/N/T]	FALSE	0.022	0.0037	1	1	1	2	Q9W2L6	Q9W2L6 [340-350]	1486.73	0.010; 0.010	;	130629.578125; ;	505		Light	0.01124	2.08	60.14
67	1	High	[R].SLSGGSSSSTSASASTSNLGK.[S]	1×HexNAc [S15]; 2×HexNAc(1)dHex(1) [T10; T16]	FALSE	0.12	0.0049	1	8	1	1	Q8IQZ6	Q8IQZ6 [1286-1306]	Q8IQZ6 1×HexNAc [S1300]; 2×HexNAc(1)dHex(1) [T1295; T1301]	0	2774.23	0.010; 0.010	;	773529.9375; ;	500	High	0.003064	0.07474	2.77	69.6
68	1	High	[R].SDCADGSDEPKHCSVCNR.[T]	3×Carbamidomethyl [C3; C13; C16]; 1×HexNAc [S14(98.2)]	FALSE	0.11	0.0049	1	2	1	1	R9PY60	R9PY60 [77-94]	R9PY60 1×HexNAc [S90(98.2)]	1	2296.89	0.010; 0.010	;	90433.234375; ;	482	High	0.003064	0.06832	2	29.52
69	1	High	[R].NSSAQYTHETLEFAQK.[I]	1×HexNAc [S3(95.4)]	FALSE	0.0003	0.0031	1	1	1	2	Q9VK00	Q9VK00 [67-82]	Q9VK00 1×HexNAc [S69(95.4)]	0	2056.95	0.010; 0.010	;	231032.078125; ;	411	High	0.002237	9.44e-05	3.46	53.98
70	1	High	[R].NNLHILLNTTATK.[I]	1×HexNAc [T12(99.8)]	FALSE	0.068	0.0037	1	2	2	2	P18173	P18173 [273-285]	P18173 1×HexNAc [T284(99.8)]	0	1655.9	0.010; 0.010	;	123534.9453125; ;	401	High	0.002358	0.03926	2.21	57.4
71	1	High	[R].LLMNSNISK.[Q]	1×HexNAc [S5(92.4)]	FALSE	0.11	0.0085	1	2	1	1	Q9VI13	Q9VI13 [114-122]	Q9VI13 1×HexNAc [S118(92.4)]	0	1222.63	0.010; 0.010	;	45190.58203125; ;	603	High	0.005784	0.09662	1.43	30.38
72	1	High	[R].LATVEGEINRVNLTGR.[I]	1×HexNAc [T14(96)]	FALSE	0.18	0.0089	1	1	1	1	P15215	P15215 [1573-1588]	P15215 1×HexNAc [T1586(96)]	1	1945.03				242	High	0.005401	0.1189	1.54
73	1	High	[R].LADTISGK.[N]	1×HexNAc [S6(98.2)]	FALSE	0.034	0.0019	1	1	1	1	Q9W1X7	Q9W1X7 [1068-1075]	Q9W1X7 1×HexNAc [S1073(98.2)]	0	1007.53				511	High	0.001448	0.03013	1.31
74	1	High	[R].LAANVTFPAHK.[F]	1×HexNAc [T6(97.4)]	FALSE	0.16	0.0089	1	1	1	1	Q8IRK0	Q8IRK0 [309-319]	Q8IRK0 1×HexNAc [T314(97.4)]	0	1371.73				234	High	0.005401	0.102	1.14
75	1	High	[R].KIGTWNSTLPDGINFTR.[T]	2×HexNAc [T4(90.4); N/T/S]	FALSE	0.033	0.0037	1	1	1	1	Q9VDH5	Q9VDH5 [384-400]	Q9VDH5 2×HexNAc [T387(90.4); N/T/S]	1	2326.16	0.480; 0.010	0.00;	133505.40625; 64017.546875;	228	High	0.002358	0.0176	3.66	75.93
76	1	High	[R].IADDIIDHPQNYHIYEGLSTLTNISR.[Y]	1×HexNAc [S25(96.3)]	FALSE	0.0019	0.0031	1	2	1	1	Q8I0D4	Q8I0D4 [844-869]	Q8I0D4 1×HexNAc [S868(96.3)]	0	3201.57	0.010; 0.010	;	549071.625; ;	235	High	0.002237	0.0007343	8.59	85.83
77	1	High	[R].GNTTTTIEVR.[L]	1×HexNAc [T6(98.5)]	FALSE	0.016	0.0037	1	2	1	3	A0A0B4LHZ4	A0A0B4LHZ4 [887-896]	A0A0B4LHZ4 1×HexNAc [T892(98.5)]	0	1294.65	0.010; 0.010	;	460066.4375; ;	198	High	0.002358	0.007551	2.03	41.1
	2	High	[R].GNTTTTIEVR.[L]	1×HexNAc [T6(93.7)]	FALSE	0.012	0.0065	1	2	2	5	A0A0B4LHZ4	A0A0B4LHZ4 [887-896]	A0A0B4LHZ4 1×HexNAc [T892(93.7)]	0	1294.65	255409		High	High	32.34
	3	High	[R].GNTTTTIEVR.[L]	1×HexNAc [T6(93.7)]	FALSE	0.012	0.0065	1	2	2	5	A0A0B4LHZ4	A0A0B4LHZ4 [887-896]	A0A0B4LHZ4 1×HexNAc [T892(93.7)]	0	1294.65	255409		High	High	32.34
78	1	High	[R].GINSTVEIWGR.[-]	1×HexNAc [T5(97.4)]	FALSE	0.032	0.0037	1	1	1	2	Q4V4H7	Q4V4H7 [102-112]	Q4V4H7 1×HexNAc [T106(97.4)]	0	1434.72	0.010; 0.010	;	1225856; ;	192	High	0.002358	0.0169	2.43	69.88
	2	High	[R].GINSTVEIWGR.[-]	1×HexNAc [N/S/T]	FALSE	0.0077	0.0065	1	1	1	2	Q4V4H7	Q4V4H7 [102-112]	1434.72	43290.9		High	High	0.001362	0.0008453
	3	High	[R].GIDSTVEIWGR.[-]	1×HexNAc [T5(97.8)]	FALSE	0.15	0.0089	1	1	1	1	A1Z979	A1Z979 [102-112]	A1Z979 1×HexNAc [T106(97.8)]	0	1435.71				187	High	0.005401	0.09689	1.98
79	1	High	[R].DVLVANTTETEFK.[Q]	1×HexNAc [T10(96.5)]	FALSE	0.0071	0.0031	1	2	1	1	Q8IMH4	Q8IMH4 [222-234]	Q8IMH4 1×HexNAc [T231(96.5)]	0	1669.82	0.010; 0.294	; 0.00	140498.375; ; 41247.5078125	99	High	0.002237	0.003145	2.71	66.1
80	1	High	[K].WNLDVNGSAEYK.[S]	1×HexNAc [S8(98.3)]	FALSE	0.18	0.0089	1	1	1	1	Q7KTG2	Q7KTG2 [2583-2594]	Q7KTG2 1×HexNAc [S2590(98.3)]	0	1598.73				632	High	0.005401	0.1162	2.08
81	1	High	[K].TGPWEGGTNITIR.[G]	1×HexNAc [T11(95)]	FALSE	0.018	0.0037	1	3	1	1	Q9V491	Q9V491 [894-906]	Q9V491 1×HexNAc [T904(95)]	0	1604.79	0.010; 0.010	;	168440.765625; ;	554	High	0.002358	0.008726	3.14	67.66
82	1	High	[K].QGAGLGQQQQFQSQPQQR.[T]	1×HexNAc(1)dHex(1) [S13(100)]	FALSE	0.18	0.0089	1	1	1	1	Q9VMD0	Q9VMD0 [682-699]	Q9VMD0 1×HexNAc(1)dHex(1) [S694(100)]	0	2363.12	0.010; 0.010	;	98233.890625; ;	430	High	0.005401	0.1209	1.34	30.96
83	1	High	[K].NLTIDESQITLR.[Q]	1×HexNAc [T10(97.7)]	FALSE	0.14	0.0064	1	1	2	2	Q0KI00	Q0KI00 [82-93]	Q0KI00 1×HexNAc [T91(97.7)]	0	1605.83				386	High	0.003949	0.08698	1.92
	2	High	[K].NLTIDESQITLR.[Q]	1×HexNAc [N/T/S]	FALSE	0.11	0.0085	1	1	1	1	Q0KI00	Q0KI00 [82-93]	1605.83	0.010; 0.010	;	282981.40625; ;	749		Light	0.09307	1.24	72.6
	3	High	[K].NLTIDESQITLR.[Q]	1×HexNAc [N/T/S]	FALSE	0.11	0.0085	1	1	1	1	Q0KI00	Q0KI00 [82-93]	1605.83	0.010; 0.010	;	282981.40625; ;	749		Light	0.09307	1.24	72.6
84	1	High	[K].NGTSSDRVTVNTGVDDIRR.[Y]	1×HexNAc [S5(81.1)]	FALSE	0.017	0.0037	1	3	1	1	Q9W0X0	Q9W0X0 [254-272]	Q9W0X0 1×HexNAc [S258(81.1)]	2	2265.11	0.010; 0.010	;	362503; ;	368	High	0.002358	0.008086	3.28	46.13
85	1	High	[K].NASVGQPLSER.[R]	1×HexNAc [S9(95.9)]	FALSE	0.021	0.0037	1	4	1	2	A8DYJ6	A8DYJ6 [223-233]	A8DYJ6 1×HexNAc [S231(95.9)]	0	1360.67	0.010; 0.010	;	378449.875; ;	351	High	0.002358	0.01062	1.8	41.74
86	1	High	[K].IETKYANGEVYGK.[Y]	1×HexNAc [T3(99.9)]	FALSE	0.093	0.007	1	1	1	1	Q9VB81	Q9VB81 [57-69]	Q9VB81 1×HexNAc [T59(99.9)]	1	1674.82	0.122; 0.010	0.00;	69705.0390625; 8484.1533203125;	551	High	0.004802	0.0799	2.22	44.15
87	1	High	[K].EEIAALGSLNVTK.[V]	1×HexNAc [N/T/S]	FALSE	0.18	0.0089	1	1	1	1	O46067	O46067 [488-500]	1547.82				111	NoQuanValues	Light	0.1161	2.52
	2	High	[K].EEIAALGSLNVTK.[V]	1×HexNAc [T12(94.6)]	FALSE	0.038	0.0019	1	1	1	1	O46067	O46067 [488-500]	O46067 1×HexNAc [T499(94.6)]	0	1547.82	0.010; 0.010	;	49927.87109375; ;	236	High	0.001448	0.03345	1.43	71.72
	3	High	[K].EEIAALGSLNVTK.[V]	1×HexNAc [N/T/S]	FALSE	0.18	0.0089	1	1	1	1	O46067	O46067 [488-500]	1547.82				111	NoQuanValues	Light	0.1161	2.52
88	1	High	[K].HSLNETPLPK.[V]	1×HexNAc [S2(99.8)]; 1×HexNAc(1)dHex(1) [T6(96.1)]	FALSE	0.11	0.0049	1	1	1	1	Q9VDW6	Q9VDW6 [1821-1830]	Q9VDW6 1×HexNAc [S1822(99.8)]; 1×HexNAc(1)dHex(1) [T1826(96.1)]	0	1687.83	0.010; 0.010	;	64493.67578125; ;	214	High	0.003064	0.07045	1.52	52.69
89	1	High	[K].GSLSYLNVTR.[K]	1×HexNAc [T9(97.9)]	TRUE	0.033	0.0019	1	1	1	1	cRAP018	cRAP018 [257-266]	cRAP018 1×HexNAc [T265(97.9)]	0	1312.67	0.010; 0.010	;	71692.7421875; ;	438	High	0.001448	0.0295	1.4	61.88
90	1	High	[K].GHNVTVVSSVPPK.[V]	1×HexNAc [T5(98.4)]	FALSE	0.0098	0.0031	1	1	2	6	Q9VJH8	Q9VJH8 [61-73]	Q9VJH8 1×HexNAc [T65(98.4)]	0	1523.81	0.647; 0.094	0.00; 0.00	78912.7109375; 51068.060546875; 7383.4755859375	185	High	0.002237	0.004493	1.84	40.7
	2	High	[K].GHNVTVVSSVPPK.[V]	1×HexNAc [T5(93.7)]	FALSE	0.22	0.0065	1	1	2	2	Q9VJH8	Q9VJH8 [61-73]	Q9VJH8 1×HexNAc [T65(93.7)]	0	1523.81		NoQuanValues	High	High
91	1	High	[K].AFGYFNFTAAEVSYK.[A]	1×HexNAc [S13(95.6)]	FALSE	0.022	0.0037	1	1	1	1	Q9VUZ0	Q9VUZ0 [104-118]	Q9VUZ0 1×HexNAc [S116(95.6)]	0	1917.89				16	High	0.002358	0.01097	3.59
92	1	High	[K].AENSTSPSHLSLYK.[Q]	1×HexNAc [S11(91.5)]	FALSE	0.0033	0.0031	1	1	1	1	A1Z7F1	A1Z7F1 [489-502]	A1Z7F1 1×HexNAc [S499(91.5)]	0	1736.83	0.010; 0.010	;	193019.71875; ;	15	High	0.002237	0.001335	2.74	46.54
	2	High	[K].AENSTSPSHLSLYK.[Q]	1×HexNAc [N/S/T]	FALSE	0.0039	0.0011	1	1	1	1	A1Z7F1	A1Z7F1 [489-502]	1736.83	0.010; 0.010	;	69073.8984375; ;	46		Light	0.003767	3.16	46.45
93	1	High	[R].LNETTTIVDR.[M]	1×HexNAc [T6(95.8)]	FALSE	0.047	0.0065	1	1	2	4	Q9VCZ0	Q9VCZ0 [5-14]	Q9VCZ0 1×HexNAc [T10(95.8)]	0	1364.69	160748		High	High	38.37
	2	High	[R].LNETTTIVDR.[M]	1×HexNAc [N/T]	FALSE	0.02	0.0037	1	1	2	2	Q9VCZ0	Q9VCZ0 [5-14]	1364.69	0.010; 0.029	; 0.00	572870.125; ; 16694.19921875	298		Light	0.01014	2.2	48.36
	3	High	[R].LNETTTIVDR.[M]	1×HexNAc [N/T]	FALSE	0.02	0.0037	1	1	2	2	Q9VCZ0	Q9VCZ0 [5-14]	1364.69	0.010; 0.029	; 0.00	572870.125; ; 16694.19921875	298		Light	0.01014	2.2	48.36
Number	Sample_name	Confidence	Annotated Sequence	Modifications	Contaminant	Qvality PEP	Qvality q-value	# Protein Groups	# Proteins	# Isoforms	# PSMs	Master Protein Accessions	Positions in Master Proteins	Modifications in Master Proteins	# Missed Cleavages	Theo. MH+ [Da]	Abundance Ratios	Abundance Ratio Variabilities [%]	Abundances (Grouped)	Precursor Quan Result ID	Confidence (by Search Engine)	Percolator q-Value (by Search Engine)	Percolator PEP (by Search Engine)	XCorr (by Search Engine)	Top Apex RT [min]
1	1	High	[R].YVNPNAENVTATISVTSDNPLEVDQHVK.[V]	1×HexNAc [N/T/S]	FALSE	6.9e-08	0.0031	1	1	1	2	Q00174	Q00174 [890-917]	3257.58	0.010; 0.010	;	270230.1875; ;	664		Light	8.265e-09	7.36	76.31
2	1	High	[R].YTNESLIVQCR.[S]	1×Carbamidomethyl [C10]; 1×HexNAc [T/N/S]	FALSE	0.11	0.0049	1	1	1	1	Q9VR25	Q9VR25 [37-47]	1585.75				660	NoQuanValues	Light	0.06956	1.05
3	1	High	[R].YSKEEIAALGSLNVTK.[V]	1×HexNAc [N/T/S]	FALSE	0.0012	0.0031	1	1	1	3	O46067	O46067 [485-500]	1926.01	0.010; 0.113	; 0.00	207546.421875; ; 23459.056640625	657		Light	0.0004364	5.12	67.38
4	1	High	[R].YNTTTTPFTR.[I]	1×HexNAc [N/T]	FALSE	0.099	0.0049	1	1	1	1	Q9VHU7	Q9VHU7 [278-287]	1404.66	0.010; 0.010	;	115747.9296875; ;	652		Light	0.06036	1.36	52.57
5	1	High	[R].YNLTILTR.[L]	1×HexNAc [N/T]	FALSE	0.13	0.0064	1	1	1	1	Q9VTL4	Q9VTL4 [27-34]	1196.65	0.010; 0.010	;	134251.53125; ;	651		Light	0.08537	1.33	70.31
6	1	High	[R].YNCSVTDTK.[K]	1×Carbamidomethyl [C3]; 1×HexNAc [N/S/T]	FALSE	0.062	0.0037	1	1	1	1	Q9VTH0	Q9VTH0 [679-687]	1290.55	0.010; 0.010	;	153779.15625; ;	648		Light	0.03549	1.23	33.57
7	1	High	[R].YLYNDSFVDKSNAR.[T]	1×HexNAc [S/N]	FALSE	0.1	0.0078	1	1	1	1	Q9VIM0	Q9VIM0 [59-72]		1	1894.88				1193	High	0.005332	0.08811	1.53
	2	High	[R].YLYNDSFVDKSNAR.[T]	1×HexNAc [S/N]	FALSE	0.01	0.0031	1	1	1	2	Q9VIM0	Q9VIM0 [59-72]	1894.88	0.010; 0.010	;	131246.96875; ;	647		Light	0.004734	2.97	55.86
8	1	High	[R].YLYNDSFVDK.[S]	1×HexNAc [N/S]	FALSE	0.031	0.0037	1	1	1	1	Q9VIM0	Q9VIM0 [59-68]	1466.67	0.010; 0.010	;	172136.59375; ;	646		Light	0.0161	1.77	64.32
9	1	High	[R].YLSHLNTSVVK.[T]	1×HexNAc [N/T/S]	FALSE	0.14	0.0098	1	6	1	1	Q9VAU1	Q9VAU1 [488-498]	1463.77	0.010; 0.010	;	198992.0625; ;	1191		Light	0.1153	1.67	49.92
	2	High	[R].YLSHLNTSVVK.[T]	1×HexNAc [N/T/S]	FALSE	0.019	0.0037	1	6	1	2	Q9VAU1	Q9VAU1 [488-498]	1463.77	0.010; 0.010	;	788730.4375; ;	645		Light	0.009411	2.45	49.93
10	1	High	[R].WYYDNETDICRPFTYGGCK.[G]	2×Carbamidomethyl [C10; C18]; 1×HexNAc [N/T]	FALSE	0.00022	0.0031	1	1	2	2	Q868Z9	Q868Z9 [1746-1764]	2648.11	0.010; 0.010	;	866891.5; ;	633		Light	6.478e-05	4.85	75.05
11	1	High	[R].WNETLVWATR.[H]	1×HexNAc [N/T]	FALSE	0.035	0.0019	1	2	1	1	A0A0B4LEV0	A0A0B4LEV0 [20-29]	1478.73				1170	NoQuanValues	Light	0.03057	1.28
12	1	High	[R].VYNVSLLK.[H]	1×HexNAc [N/S]	FALSE	0.0085	0.0011	1	1	1	2	Q00174	Q00174 [1581-1588]	1138.64	0.010; 0.010	;	933957.9375; ;	1167		Light	0.007873	1.37	62.74
	2	High	[R].VYNVSLLK.[H]	1×HexNAc [N/S]	FALSE	0.1	0.0049	1	1	1	2	Q00174	Q00174 [1581-1588]	1138.64	0.010; 0.010	;	648317.25; ;	631		Light	0.06204	1.39	62.91
14	1	High	[R].VTFQQHEITNNTIIK.[L]	1×HexNAc [T/N]	FALSE	0.11	0.0049	1	1	1	1	Q9W2V9	Q9W2V9 [401-415]	1989.03	0.010; 0.010	;	192742.3125; ;	623		Light	0.06813	1.36	57.65
15	1	High	[R].VSNLSTLKDEANELASNTDRNCK.[R]	1×Carbamidomethyl [C22]; 1×HexNAc [S/N/T]	FALSE	0.00096	0.0031	1	1	2	3	P11046	P11046 [1339-1361]	2782.32	0.010; 0.010	;	248574.359375; ;	621		Light	0.0003383	6.48	66.06
16	1	High	[R].VSNLSTLKDEANELASNTDR.[N]	1×HexNAc [S/N/T]	FALSE	0.00054	0.0031	1	1	1	2	P11046	P11046 [1339-1358]	2380.15	0.010; 0.010	;	265813.25; ;	620		Light	0.0001776	4.56	71.2
17	1	High	[R].VREVLCLSNGTK.[S]	1×Carbamidomethyl [C6]; 1×HexNAc [S/N/T]	FALSE	0.029	0.0019	1	1	1	2	Q868Z9	Q868Z9 [661-672]	1578.82	0.010; 0.010	;	174435.359375; ;	1144		Light	0.02574	1.94	48.13
	2	High	[R].VREVLCLSNGTK.[S]	1×Carbamidomethyl [C6]; 1×HexNAc [S/N/T]	FALSE	0.017	0.0037	1	1	2	3	Q868Z9	Q868Z9 [661-672]	1578.82	0.010; 0.010	;	875827.75; ;	616		Light	0.00822	2.67	48.11
18	1	High	[R].VQIGGINSTDSR.[F]	1×HexNAc [T/S/N]	FALSE	0.057	0.0028	1	5	1	1	Q9VZ96	Q9VZ96 [1701-1712]		0	1449.72	0.010; 0.010	;	113397.5546875; ;	1136	High	0.001999	0.04942	2.07	48.68
	2	High	[R].VQIGGINSTDSR.[F]	1×HexNAc [T/S/N]	FALSE	0.068	0.0037	1	5	1	2	Q9VZ96	Q9VZ96 [1701-1712]	1449.72	0.010; 0.010	;	166942.453125; ;	612		Light	0.03928	1.74	48.83
19	1	High	[R].VPIVNQTACR.[N]	1×Carbamidomethyl [C9]; 1×HexNAc [N/T]	FALSE	0.00077	0.0011	1	1	1	2	Q9VAG3	Q9VAG3 [169-178]	1360.69	0.010; 0.010	;	370828.1875; ;	1132		Light	0.0007846	2.13	45.33
	2	High	[R].VPIVNQTACR.[N]	1×Carbamidomethyl [C9]; 1×HexNAc [N/T]	FALSE	0.014	0.0031	1	1	1	1	Q9VAG3	Q9VAG3 [169-178]	1360.69	0.010; 0.010	;	887241.8125; ;	611		Light	0.006645	2.73	45.42
20	1	High	[R].VLVANVTK.[V]	1×HexNAc [N/T]	FALSE	0.032	0.0019	1	1	1	1	Q7KTG2	Q7KTG2 [1116-1123]	1046.61	100.000;	;	; 39092.8046875;	1119		Light	0.02813	1.29	43.13
	2	High	[R].VLVANVTK.[V]	1×HexNAc [N/T]	FALSE	0.068	0.0037	1	1	1	1	Q7KTG2	Q7KTG2 [1116-1123]	1046.61	0.010; 0.010	;	278388.0625; ;	604		Light	0.03918	1.6	43.23
21	1	High	[R].VLNETSNITLHYR.[Q]	2×HexNAc [S/N/T]	FALSE	0.086	0.0037	1	1	1	1	Q8SWX4	Q8SWX4 [92-104]	1965.98	0.010; 0.010	;	54662.984375; ;	598		Light	0.05108	1.41	55.88
22	1	High	[R].VLIIQNATTNDNGEYSCTITNPR.[K]	1×Carbamidomethyl [C17]; 1×HexNAc [N/T/S]	FALSE	4.1e-05	0.0031	1	1	1	2	Q9VN14	Q9VN14 [624-646]	2797.33	0.010; 0.010	;	224471.65625; ;	596		Light	1.025e-05	4.44	70.27
23	1	High	[R].VGNSSADLQR.[N]	1×HexNAc [N/S]	FALSE	0.079	0.0037	1	1	1	1	Q9VYR4	Q9VYR4 [195-204]	1249.6	0.010; 0.010	;	198901.609375; ;	592		Light	0.04691	1.25	32.04
24	1	High	[R].VAQASNFTVK.[E]	1×HexNAc [S/N/T]	FALSE	0.067	0.0037	1	1	1	1	Q9VH64	Q9VH64 [294-303]		0	1267.65	0.010; 0.010	;	110629.625; ;	1077	High	0.00262	0.05844	1.1	43.23
	2	High	[R].VAQASNFTVK.[E]	1×HexNAc [S/N/T]	FALSE	0.02	0.0037	1	1	1	2	Q9VH64	Q9VH64 [294-303]	1267.65	0.010; 0.010	;	410079.4375; ;	584		Light	0.009858	2.06	43.37
	3	High	[R].VAQASNFTVK.[E]	1×HexNAc [S/N/T]	FALSE	0.0073	0.0065	1	1	1	3	Q9VH64	Q9VH64 [294-303]	1267.65	268985		High	High	0.001362	0.000779
25	1	High	[R].TWVNVSTHVQAR.[E]	1×HexNAc [N/S/T]	FALSE	0.00071	0.0031	1	1	1	1	Q9VN14	Q9VN14 [988-999]	1600.81	0.010; 0.010	;	531640.25; ;	580		Light	0.0002436	4.07	50.88
26	1	High	[R].TTLVDNNTWNNSHIALVGK.[A]	1×HexNAc [N/T/S]	FALSE	0.017	0.0011	1	1	1	1	Q9XZ53	Q9XZ53 [570-588]	2300.15	0.010; 0.010	;	206930.953125; ;	1052		Light	0.01532	3.29	69.1
27	1	High	[R].TPYNITLVHDR.[K]	1×HexNAc [T/N]	FALSE	0.015	0.0031	1	1	1	2	Q9VTL4	Q9VTL4 [170-180]	1531.78	100.000;	;	; 18011.15625;	569		Light	0.007364	1.49	56.1
28	1	High	[R].TNYSCYAYNEGGK.[G]	1×Carbamidomethyl [C5]; 1×HexNAc [T/N/S]	FALSE	0.014	0.0031	1	6	1	2	Q9VNP2	Q9VNP2 [644-656]	1729.7	0.010; 0.010	;	58237.1953125; ;	567		Light	0.006675	2.1	49.55
29	1	High	[R].TNCSADGLEIQEQAVK.[F]	1×Carbamidomethyl [C3]; 1×HexNAc [T/N/S]	FALSE	0.038	0.0037	1	1	1	2	Q7K0P4	Q7K0P4 [41-56]	1965.91	0.641; 0.239	0.00; 0.00	81854.130859375; 52473.4375; 19591.8515625	564		Light	0.02063	1.84	57.83
30	1	High	[R].TKPDLDRVNNLQSIANATK.[E]	1×HexNAc [N/T/S]	FALSE	0.0081	0.0031	1	1	3	5	P11046	P11046 [1566-1584]	2301.2	0.010; 0.030	; 0.00	637029.921875; ; 18836.939453125	558		Light	0.003623	2.84	59.32
31	1	High	[R].TILVDNNTWNNTHISR.[V]	1×HexNAc [N/T/S]	FALSE	0.00029	0.0031	1	1	1	2	Q9VRE0	Q9VRE0 [550-565]	2101.03	0.010; 0.010	;	432741.71875; ;	560		Light	8.869e-05	3.52	62.07
32	1	High	[R].TFNTTK.[F]	1×HexNAc [N/T]	FALSE	0.13	0.0064	1	1	1	2	Q9W2L6	Q9W2L6 [141-146]	914.447	0.010; 0.010	;	173944.390625; ;	549		Light	0.08297	1.08	25.01
	2	High	[R].TFNTTK.[F]	1×HexNAc [N/T]	FALSE	0.15	0.0065	1	1	1	5	Q9W2L6	Q9W2L6 [141-146]	914.447	933804		High	High	0.001362	0.05223
33	1	High	[R].TETNFTSNIK.[L]	1×HexNAc [T/N/S]	FALSE	0.021	0.0037	1	1	1	2	A0A126GUP6	A0A126GUP6 [293-302]	1357.65	0.010; 0.010	;	314894.09375; ;	546		Light	0.01052	2.11	46.94
	2	High	[R].TETNFTSNIK.[L]	1×HexNAc [T/N/S]	FALSE	0.083	0.0065	1	1	1	1	A0A126GUP6	A0A126GUP6 [293-302]	1357.65	92661.2		High	High	0.001362	0.02196
34	1	High	[R].TCAYQNQTSTNYCYQR.[A]	2×Carbamidomethyl [C2; C13]; 1×HexNAc(1)dHex(1) [T/N/S]	FALSE	0.011	0.0031	1	1	1	1	Q9VLP2	Q9VLP2 [86-101]	2406.98				539	NoQuanValues	Light	0.004906	2.34
	2	High	[R].TCAYQNQTSTNYCYQR.[A]	2×Carbamidomethyl [C2; C13]; 1×HexNAc [N/T/S]	FALSE	0.00062	0.0031	1	1	1	3	Q9VLP2	Q9VLP2 [86-101]	2260.92	0.010; 0.010	;	292514.8125; ;	540		Light	0.0002095	3.37	47.34
35	1	High	[R].SVQVEVANLSR.[A]	1×HexNAc [N/S]	FALSE	0.016	0.0011	1	2	1	2	B7Z0B3	B7Z0B3 [193-203]	1404.73	0.010; 0.010	;	125960.234375; ;	975		Light	0.01424	1.69	57.14
36	1	High	[R].SSTTLGNITVAYDEAVK.[S]	1×HexNAc [N/T/S]	FALSE	0.00031	0.0011	1	1	1	2	Q00174	Q00174 [2209-2225]	1971.98	0.010; 0.010	;	214355.71875; ;	961		Light	0.0003212	2.33	76.1
	2	High	[R].SSTTLGNITVAYDEAVK.[S]	1×HexNAc [N/T/S]	FALSE	0.00063	0.0031	1	1	2	5	Q00174	Q00174 [2209-2225]	1971.98	0.010; 0.073	; 0.00	400200.83984375; ; 29385.349609375	524		Light	0.0002127	2.97	76.23
	3	High	[R].SSTTLGNITVAYDEAVK.[S]	1×HexNAc [N/T/S]	FALSE	0.0052	0.0065	1	1	1	4	Q00174	Q00174 [2209-2225]	1971.98		NoQuanValues	High	High	0.001362	0.0004998
37	1	High	[R].SSPNASVVK.[F]	1×HexNAc [N/S]	FALSE	0.031	0.0037	1	1	1	1	Q9VZ58	Q9VZ58 [60-68]	1091.56	0.010; 0.047	; 0.00	308257.4375; ; 14499.2451171875	521		Light	0.01636	1.36	30.31
	2	High	[R].SSPNASVVK.[F]	1×HexNAc [N/S]	FALSE	0.062	0.0065	1	1	1	3	Q9VZ58	Q9VZ58 [60-68]	1091.56	635033		High	High	0.001362	0.01489
38	1	High	[R].SSNISVLDAK.[T]	1×HexNAc [S/N]	FALSE	0.006	0.0011	1	3	1	2	A0A0B4K709	A0A0B4K709 [218-227]		0	1236.63	100.000;	;	; 66455.6171875;	952	High	0.0008681	0.005683	1.13	49.98
	2	High	[R].SSNISVLDAK.[T]	1×HexNAc [S/N]	FALSE	0.014	0.0031	1	3	1	2	A0A0B4K709	A0A0B4K709 [218-227]	1236.63	0.010; 0.010	;	267660.09375; ;	520		Light	0.00651	1.95	50.16
	3	High	[R].SSNISVLDAK.[T]	1×HexNAc [S/N]	FALSE	0.015	0.0065	1	3	1	4	A0A0B4K709	A0A0B4K709 [218-227]	1236.63	224083		High	High	0.001362	0.002058
39	1	High	[R].SRPNGTDLQHVVK.[D]	1×HexNAc [S/N/T]	FALSE	0.096	0.007	1	1	1	1	A8JTM7	A8JTM7 [2251-2263]		0	1653.86	0.374; 0.010	0.00;	44217.86328125; 16544.251953125;	945	High	0.004802	0.08285	1.21	40.84
	2	High	[R].SRPNGTDLQHVVK.[D]	1×HexNAc [S/N/T]	FALSE	0.096	0.007	1	1	1	1	A8JTM7	A8JTM7 [2251-2263]		0	1653.86	0.374; 0.010	0.00;	44217.86328125; 16544.251953125;	945	High	0.004802	0.08285	1.21	40.84
	3	High	[R].SRPNGTDLQHVVK.[D]	1×HexNAc [S/N/T]	FALSE	0.0043	0.0031	1	1	1	5	A8JTM7	A8JTM7 [2251-2263]	1653.86	0.010; 0.010	;	250599.078125; ;	516		Light	0.001815	3.01	40.72
40	1	High	[R].SQSLNGSVSR.[L]	1×HexNAc [N/S]	FALSE	0.093	0.007	1	2	1	1	A0A0B4KFD1	A0A0B4KFD1 [711-720]	1237.6	0.010; 0.010	;	31460.8671875; ;	939		Light	0.08002	0.95	32.58
	2	High	[R].SQSLNGSVSR.[L]	1×HexNAc [S/N]	FALSE	0.093	0.0049	1	2	1	1	A0A0B4KFD1	A0A0B4KFD1 [711-720]	1237.6	0.010; 0.010	;	146326.046875; ;	512		Light	0.05614	1.52	32.63
41	1	High	[R].SNVTAAQVR.[Y]	1×HexNAc [S/N/T]	FALSE	0.12	0.0049	1	1	1	1	Q86B58	Q86B58 [110-118]	1148.59	0.010; 0.010	;	205799.796875; ;	504		Light	0.07736	1.48	31.51
	2	High	[R].SNVTAAQVR.[Y]	1×HexNAc [S/N/T]	FALSE	0.1	0.0065	1	1	1	4	Q86B58	Q86B58 [110-118]	1148.59	316891		High	High	0.001362	0.03043
42	1	High	[R].SNISEIISLVPEIER.[R]	1×HexNAc [S/N]	FALSE	0.066	0.0037	1	4	1	1	Q0KHQ2	Q0KHQ2 [149-163]		0	1902.01				923	High	0.001999	0.05696	1.34
43	1	High	[R].SGNGCENCLCDPVGSYNSTCDR.[Y]	4×Carbamidomethyl [C5; C8; C10; C20]; 1×HexNAc [N/S/T]	FALSE	0.0017	0.0031	1	1	1	1	P15215	P15215 [949-970]	2725.02	0.010; 0.315	; 0.00	99560.5703125; ; 31392.36328125	494		Light	0.0006218	4.76	59.65
44	1	High	[R].SFNASGNLIK.[K]	1×HexNAc [N/S]	FALSE	0.044	0.0037	1	3	1	2	A0A0B4LGB0	A0A0B4LGB0 [679-688]	1253.64	0.010; 0.010	;	297749.40625; ;	489		Light	0.02414	1.74	54.13
45	1	High	[R].SFINGSLR.[M]	1×HexNAc [N/S]	FALSE	0.047	0.0028	1	1	1	1	Q9VCW2	Q9VCW2 [392-399]	1096.56	0.010; 0.010	;	192731.5; ;	886		Light	0.0414	0.97	56.48
46	1	High	[R].SDVSINGTGFR.[A]	1×HexNAc [N/T/S]	FALSE	0.053	0.0037	1	1	1	1	Q9VTP0	Q9VTP0 [2079-2089]	1355.64				484	NoQuanValues	Light	0.03006	1.58
47	1	High	[R].RGPIGLAGQSGDPGLNGSR.[G]	1×HexNAc [N/S]	FALSE	0.0055	0.0031	1	1	1	1	Q9VMV5	Q9VMV5 [387-405]	2012.02	0.010; 0.010	;	35878.98828125; ;	470		Light	0.002379	2.75	54.74
48	1	High	[R].QVVTVNYTK.[M]	1×HexNAc [N/T]	FALSE	0.18	0.0089	1	1	1	1	M9MRH9	M9MRH9 [29-37]	1254.66	0.010; 0.010	;	82715.1640625; ;	466		Light	0.1195	1.49	45.71
49	1	High	[R].QNYTILDQITENAKK.[E]	1×HexNAc [N/T]	FALSE	0.00047	0.0011	1	1	1	1	P15215	P15215 [1155-1169]	1982.01	0.010; 0.010	;	207059.640625; ;	824		Light	0.0004849	2.96	69.72
	2	High	[R].QNYTILDQITENAKK.[E]	1×HexNAc [N/T]	FALSE	0.02	0.0065	1	1	1	4	P15215	P15215 [1155-1169]	1982.01		NoQuanValues	High	High	0.001362	0.003111
50	1	High	[R].QNQTASVAQKPEK.[E]	1×HexNAc [N/T/S]	FALSE	0.015	0.0011	1	2	1	1	M9PCV1	M9PCV1 [778-790]	1631.82	0.010; 0.010	;	62428.0859375; ;	823		Light	0.01381	1.81	25.52
51	1	High	[R].QLMYNSSWSGR.[N]	1×Oxidation [M3]; 1×HexNAc [N/S]	FALSE	0.0037	0.0011	1	5	1	3	A0A0B4KHG5	A0A0B4KHG5 [678-688]		0	1547.68	0.010; 0.010	;	954313.33984375; ;	816	High	0.0008681	0.003549	3.03	55.37
	2	High	[R].QLMYNSSWSGR.[N]	1×HexNAc [N/S]	FALSE	0.00052	0.0011	1	5	1	1	A0A0B4KHG5	A0A0B4KHG5 [678-688]	1531.68	0.010; 0.010	;	260622.734375; ;	815		Light	0.0005364	2.52	60.94
	3	High	[R].QLMYNSSWSGR.[N]	1×Oxidation [M3]; 1×HexNAc [N/S]	FALSE	0.0069	0.0031	1	5	1	1	A0A0B4KHG5	A0A0B4KHG5 [678-688]	1547.68	0.010; 0.010	;	109927.375; ;	440		Light	0.003051	2.1	55.45
	4	High	[R].QLMYNSSWSGR.[N]	1×HexNAc [N/S]	FALSE	0.021	0.0037	1	5	1	1	A0A0B4KHG5	A0A0B4KHG5 [678-688]	1531.68				439	NoQuanValues	Light	0.01072	2.24
52	1	High	[R].QLLLWANTSK.[S]	1×HexNAc [N/T/S]	FALSE	0.092	0.0049	1	2	2	2	X2JFT2	X2JFT2 [169-178]	1376.74	0.010; 0.010	;	344839.59375; ;	438		Light	0.0552	3.1	72.85
53	1	High	[R].QLLEDNITQR.[L]	1×HexNAc [N/T]	FALSE	0.097	0.0049	1	1	1	1	Q9VIL5	Q9VIL5 [83-92]	1432.73	0.010; 0.010	;	77599.7109375; ;	437		Light	0.05889	1.57	55.64
54	1	High	[R].QGSCQAGFSAAINGNGSR.[L]	1×Carbamidomethyl [C4]; 1×HexNAc [N/S]	FALSE	0.0041	0.0031	1	1	1	3	P12080	P12080 [195-212]	1984.88	0.010; 0.357	; 0.00	126778.38671875; ; 45263.68359375	434		Light	0.001732	2.41	52.13
55	1	High	[R].QASGGGPQTTTAGPSAGNVANATTALAGGK.[S]	1×HexNAc [S/T/N]	FALSE	0.0072	0.0011	1	7	1	1	Q86NK8	Q86NK8 [7-36]		0	2816.37	0.010; 0.010	;	52459.6796875; ;	791	High	0.0008681	0.006748	2.45	62.98
56	1	High	[R].QAENGSFTEHGEYFYSSQR.[S]	1×HexNAc [N/S/T]	FALSE	8.2e-05	0.0031	1	4	1	4	Q9VIT9	Q9VIT9 [1101-1119]	2440.03	1.082; 0.010	0.00;	90951.625; 98392.421875;	424		Light	2.179e-05	3.5	56.99
57	1	High	[R].NYTWSK.[T]	1×HexNAc [N/T/S]	FALSE	0.16	0.0089	1	1	1	1	Q9VDT5	Q9VDT5 [152-157]	1001.46	0.010; 0.010	;	337076.71875; ;	422		Light	0.1055	1.06	42.07
58	1	High	[R].NWTSYQTGFGDLK.[G]	1×HexNAc [N/T/S]	FALSE	0.026	0.0037	1	2	1	1	A0A0B4K7T3	A0A0B4K7T3 [88-100]	1719.79				420	NoQuanValues	Light	0.01353	2.52
59	1	High	[R].NWTLADYGVACK.[Q]	1×Carbamidomethyl [C11]; 1×HexNAc [N/T]	FALSE	0.054	0.0037	1	1	1	1	M9NDE3	M9NDE3 [221-232]	1600.73				419	NoQuanValues	Light	0.03063	2.63
60	1	High	[R].NVSDYIDVVLR.[H]	1×HexNAc [N/S]	FALSE	0.044	0.0065	1	1	1	4	P33438	P33438 [402-412]	1495.76	160398		High	High	0.001362	0.009272
61	1	High	[R].NTQNFNLTGELHSR.[A]	1×HexNAc [N/T/S]	FALSE	0.0015	0.0031	1	1	1	2	Q7KTG2	Q7KTG2 [2916-2929]	1833.87	0.010; 0.010	;	472479.9375; ;	416		Light	0.0005721	3.74	57.09
62	1	High	[R].NTNVSIEDIKR.[I]	1×HexNAc [N/T/S]	FALSE	0.018	0.0011	1	1	1	1	Q9V3I0	Q9V3I0 [53-63]	1491.76	0.010; 0.010	;	29243.8125; ;	776		Light	0.01627	1.75	46.21
	2	High	[R].NTNVSIEDIKR.[I]	1×HexNAc [N/T/S]	FALSE	0.0018	0.0031	1	1	2	2	Q9V3I0	Q9V3I0 [53-63]	1491.76	0.010; 0.010	;	183959.78125; ;	415		Light	0.0006959	2.46	46.32
	3	High	[R].NTNVSIEDIKR.[I]	1×HexNAc [N/T/S]	FALSE	0.0003	0.0065	1	1	1	13	Q9V3I0	Q9V3I0 [53-63]	1491.76	295443		High	High	0.001362	9.908e-06
63	1	High	[R].NSSELYNLR.[T]	1×HexNAc [N/S]	FALSE	0.037	0.0037	1	1	1	2	A0A0B4K692	A0A0B4K692 [315-323]	1298.62	0.010; 0.010	;	194421.34375; ;	412		Light	0.02012	1.38	54.16
64	1	High	[R].NQTLVQVK.[L]	1×HexNAc [N/T]	FALSE	0.066	0.0037	1	3	1	1	P10040	P10040 [1352-1359]	1132.62	0.010; 0.010	;	567697.6875; ;	409		Light	0.03789	1.7	41.48
	2	High	[R].NQTLVQVK.[L]	1×HexNAc [N/T]	FALSE	0.13	0.0065	1	3	1	1	P10040	P10040 [1352-1359]	1132.62	103183		High	High	0.001362	0.04051
65	1	High	[R].NQSSEVCTLR.[Q]	1×Carbamidomethyl [C7]; 1×HexNAc [N/S/T]	FALSE	0.035	0.0037	1	1	1	2	Q9VPX0	Q9VPX0 [337-346]	1396.64	0.010; 0.010	;	216706.953125; ;	407		Light	0.01859	1.34	39.33
66	1	High	[R].NNSVSGGCYGPHWR.[R]	1×Carbamidomethyl [C8]; 1×HexNAc [S/N]	FALSE	0.0044	0.0031	1	2	1	1	Q95R73	Q95R73 [88-101]	1793.77	0.010; 0.010	;	108081.8046875; ;	404		Light	0.001848	2.51	50.19
67	1	High	[R].NNGTAYHLAVQGGSLIR.[I]	1×HexNAc [N/T/S]	FALSE	0.029	0.0037	1	1	1	1	Q9U4G1	Q9U4G1 [138-154]	1974				400	NoQuanValues	Light	0.01485	1.9
68	1	High	[R].NNFTVYINNRK.[A]	1×HexNAc [N/T]	FALSE	0.072	0.0047	1	1	1	1	Q9VLT3	Q9VLT3 [760-770]	1585.8				758	NoQuanValues	Light	0.06258	1.6
	2	High	[R].NNFTVYINNRK.[A]	1×HexNAc [T/N]	FALSE	0.035	0.0037	1	1	1	1	Q9VLT3	Q9VLT3 [760-770]	1585.8	0.010; 0.010	;	88282.421875; ;	398		Light	0.01875	2.09	51.67
	3	High	[R].NNFTVYINNR.[K]	1×HexNAc [N/T]	FALSE	0.063	0.0037	1	1	1	2	Q9VLT3	Q9VLT3 [760-769]	1457.7	0.010; 0.010	;	223593.28125; ;	397		Light	0.03588	2.29	62.25
69	1	High	[R].NNFTQYDHHDYPGVVPR.[T]	1×HexNAc [N/T]	FALSE	0.07	0.0037	1	1	1	1	Q9VH78	Q9VH78 [38-54]	2262.02	0.010; 0.010	;	64676.7109375; ;	396		Light	0.04086	1.94	57.29
70	1	High	[R].NNDTQHELVFK.[A]	1×HexNAc [N/T]	FALSE	0.0026	0.0031	1	2	1	2	Q9VLH9	Q9VLH9 [534-544]	1547.73	0.010; 0.010	;	390035.1875; ;	394		Light	0.001016	3.11	46.46
	2	High	[R].NNDTQHELVFK.[A]	1×HexNAc [N/T]	FALSE	0.076	0.0065	1	2	1	3	Q9VLH9	Q9VLH9 [534-544]	1547.73	147753		High	High	0.001362	0.01959
71	1	High	[R].NNCVPTCPLGCPHGR.[C]	3×Carbamidomethyl [C3; C7; C11]; 1×HexNAc [N/T]	FALSE	0.018	0.0037	1	1	1	2	Q9VJU8	Q9VJU8 [171-185]	1941.84	0.010; 0.010	;	186031.09375; ;	393		Light	0.008629	2.56	46.21
72	1	High	[R].NLTSQEGLLR.[V]	1×HexNAc [N/T/S]	FALSE	0.044	0.0037	1	1	1	1	Q9VZZ4	Q9VZZ4 [962-971]	1333.7	0.010; 0.010	;	172743.859375; ;	389		Light	0.02427	1.94	57.52
73	1	High	[R].NLNSCSHR.[E]	1×Carbamidomethyl [C5]; 1×HexNAc [N/S]	FALSE	0.18	0.0089	1	1	1	1	Q9V496	Q9V496 [188-195]	1190.52	0.010; 0.010	;	17919.84765625; ;	380		Light	0.1158	1.01	20.77
74	1	High	[R].NITGETGQVAFDDNGDR.[I]	1×HexNAc [N/T]	FALSE	0.0056	0.0031	1	1	1	1	Q24418	Q24418 [345-361]	2011.88				385	NoQuanValues	Light	0.002403	2.63
75	1	High	[R].NISLDIR.[Y]	1×HexNAc [N/S]	FALSE	0.026	0.0019	1	5	1	2	A0A0B4KHG5	A0A0B4KHG5 [1161-1167]	1033.55	0.010; 0.010	;	2801776.25; ;	746		Light	0.02292	1.4	60.62
	2	High	[R].NISLDIR.[Y]	1×HexNAc [N/S]	FALSE	0.14	0.0064	1	5	1	3	A0A0B4KHG5	A0A0B4KHG5 [1161-1167]	1033.55	0.010; 0.010	;	12930964; ;	381		Light	0.08943	1.49	60.75
	3	High	[R].NISLDIR.[Y]	1×HexNAc [N/S]	FALSE	0.06	0.0065	1	5	1	5	A0A0B4KHG5	A0A0B4KHG5 [1161-1167]	1033.55	2.53215e+06		High	High	0.001362	0.01428
76	1	High	[R].NGTQSQLFIDREQVPLSEFAAR.[V]	1×HexNAc [N/T/S]	FALSE	0.17	0.0089	1	5	1	1	Q9VZ96	Q9VZ96 [1667-1688]	2709.35				367	NoQuanValues	Light	0.1099	4.07
77	1	High	[R].NGTQSQLFIDR.[E]	1×HexNAc [N/T/S]	FALSE	0.086	0.0037	1	5	1	2	Q9VZ96	Q9VZ96 [1667-1677]	1481.72	100.000; 100.000	;	; 9377.232421875; 335271.28125	366		Light	0.05154	1.5	58.44
78	1	High	[R].NFTRPQSVTSTR.[E]	1×HexNAc [N/T/S]	FALSE	0.15	0.0089	1	1	1	1	M9NDE3	M9NDE3 [523-534]	1596.8	0.010; 0.010	;	325185.46875; ;	362		Light	0.09509	1.34	38.91
79	1	High	[R].NFSFESASNR.[T]	1×HexNAc [S/N]	FALSE	0.065	0.0028	1	1	1	1	Q7PLT4	Q7PLT4 [160-169]		0	1361.6	0.010; 0.433	; 0.00	45128.16015625; ; 19553.646484375	726	High	0.001999	0.05657	1.42	54.42
	2	High	[R].NFSFESASNR.[T]	1×HexNAc [S/N]	FALSE	0.19	0.0089	1	1	1	1	Q7PLT4	Q7PLT4 [160-169]	1361.6	0.010; 0.010	;	45879.1875; ;	361		Light	0.1233	1.18	54.47
80	1	High	[R].NDTELLNYRK.[Y]	1×HexNAc [N/T]	FALSE	0.0022	0.0011	1	1	1	4	Q9VLT3	Q9VLT3 [917-926]	1468.73	0.010; 0.010	;	333321.8125; ;	722		Light	0.002192	2.56	47.03
	2	High	[R].NDTELLNYRK.[Y]	1×HexNAc [N/T]	FALSE	0.00066	0.0031	1	1	2	4	Q9VLT3	Q9VLT3 [917-926]	1468.73	0.010; 0.010	;	1197453.375; ;	358		Light	0.0002217	3.42	47.16
	3	High	[R].NDTELLNYR.[K]	1×HexNAc [N/T]	FALSE	0.017	0.0011	1	1	1	1	Q9VLT3	Q9VLT3 [917-925]	1340.63	0.010; 0.010	;	214887.96875; ;	721		Light	0.01566	1.41	59.01
	4	High	[R].NDTELLNYR.[K]	1×HexNAc [N/T]	FALSE	0.037	0.0037	1	1	1	3	Q9VLT3	Q9VLT3 [917-925]	1340.63	0.010; 0.010	;	489676.3125; ;	357		Light	0.01977	1.94	59.2
81	1	High	[R].NATAIYANADYRK.[R]	1×HexNAc [N/T]	FALSE	0.048	0.0037	1	5	1	2	A8JV19	A8JV19 [713-725]	1673.81	0.010; 0.010	;	127374.8046875; ;	353		Light	0.02674	2.19	44.37
82	1	High	[R].MTLDPEGNLWFSNVTR.[E]	1×Oxidation [M1]; 1×HexNAc [S/N/T]	FALSE	0.0061	0.0011	1	3	1	1	M9NEZ5	M9NEZ5 [186-201]		0	2098.97	0.010; 0.010	;	92154.171875; ;	707	High	0.0008681	0.005775	2.36	85.67
	2	High	[R].MTLDPEGNLWFSNVTR.[E]	1×HexNAc [S/N/T]	FALSE	0.0057	0.0011	1	3	1	1	M9NEZ5	M9NEZ5 [186-201]		0	2082.98				708	High	0.0008681	0.005426	2.38
83	1	High	[R].LVEHTLNTTR.[I]	1×HexNAc [N/T]	FALSE	0.14	0.0098	1	1	1	1	Q9VKZ7	Q9VKZ7 [407-416]	1386.72	0.010; 0.010	;	33640.6640625; ;	681		Light	0.1182	1.33	36.23
	2	High	[R].LVEHTLNTTR.[I]	1×HexNAc [N/T]	FALSE	0.052	0.0037	1	1	1	2	Q9VKZ7	Q9VKZ7 [407-416]	1386.72	0.010; 0.010	;	239483.0625; ;	338		Light	0.02879	2.33	36.13
84	1	High	[R].LTVHNTSMR.[D]	1×Oxidation [M8]; 1×HexNAc [N/T/S]	FALSE	0.12	0.0091	1	1	1	1	Q9VN14	Q9VN14 [908-916]		0	1277.62				680	High	0.006194	0.102	1.54
	2	High	[R].LTVHNTSMR.[D]	1×Oxidation [M8]; 1×HexNAc [N/T/S]	FALSE	0.13	0.0064	1	1	1	1	Q9VN14	Q9VN14 [908-916]	1277.62	0.010; 0.010	;	84240.15625; ;	337		Light	0.08466	1.53	25.76
85	1	High	[R].LTKNLTLSR.[K]	1×HexNAc [T/N/S]	FALSE	0.017	0.0037	1	1	1	1	Q9VAG3	Q9VAG3 [120-128]	1248.72	0.010; 0.010	;	68241.5703125; ;	332		Light	0.00857	1.95	40.07
86	1	High	[R].LNLSATGAHELPEGLFKK.[Q]	1×HexNAc [N/S/T]	FALSE	0.0025	0.0031	1	1	1	1	Q9VBR3	Q9VBR3 [323-340]	2128.13	0.010; 0.010	;	55686.015625; ;	301		Light	0.0009686	3.35	69.89
	2	High	[R].LNLSATGAHELPEGLFK.[K]	1×HexNAc [N/S/T]	FALSE	0.0015	0.0031	1	1	1	1	Q9VBR3	Q9VBR3 [323-339]	2000.03	0.010; 0.010	;	76266.78125; ;	300		Light	0.0005648	4.54	76.98
87	1	High	[R].LNISHNYVDK.[I]	1×HexNAc [N/S]	FALSE	0.12	0.0049	1	2	1	1	M9MSI4	M9MSI4 [284-293]	1405.7	0.010; 0.010	;	27888.126953125; ;	302		Light	0.07318	0.89	43.99
88	1	High	[R].LNGNVIQPQSNTGNR.[Q]	1×HexNAc(1)dHex(1) [N/S/T]	FALSE	0.12	0.0091	1	1	1	1	Q9W260	Q9W260 [168-182]		0	1960.96	0.010; 0.010	;	286774.03125; ;	620	High	0.006194	0.1065	1.5	43.36
89	1	High	[R].LNETCTSSK.[F]	1×Carbamidomethyl [C5]; 1×HexNAc [N/T/S]	FALSE	0.15	0.0089	1	4	1	1	M9PGX9	M9PGX9 [449-457]	1242.55	0.010; 0.010	;	33655.33984375; ;	296		Light	0.09381	0.98	24.39
90	1	High	[R].LNASAGK.[V]	1×HexNAc [N/S]	FALSE	0.15	0.0065	1	1	1	3	Q00174	Q00174 [2523-2529]	863.447	349397		High	High	0.001362	0.05256
91	1	High	[R].LLQSNLFNHSK.[L]	1×HexNAc [N/S]	FALSE	0.026	0.0037	1	1	1	1	M9NDE3	M9NDE3 [2224-2234]	1503.78	0.010; 0.010	;	131808.375; ;	289		Light	0.0132	1.81	54.41
92	1	High	[R].LLPAFNTSTGIPHAR.[V]	1×HexNAc [N/T/S]	FALSE	0.041	0.0037	1	2	1	1	M9PCV1	M9PCV1 [188-202]	1797.95	0.010; 0.010	;	103145.8515625; ;	287		Light	0.02211	1.56	66.32
93	1	High	[R].LLNDTFGECGRPR.[V]	1×Carbamidomethyl [C9]; 1×HexNAc [N/T]	FALSE	0.0081	0.0031	1	2	1	2	Q9VKV1	Q9VKV1 [162-174]	1737.82	0.010; 0.010	;	943162.5625; ;	284		Light	0.003659	3.09	53.64
94	1	High	[R].LHAVNSTLLPK.[D]	1×HexNAc [N/S/T]	FALSE	0.17	0.0089	1	1	1	2	A1Z6H7	A1Z6H7 [878-888]	1395.78	0.010; 0.010	;	322271.40625; ;	272		Light	0.1127	1.18	52.03
95	1	High	[R].LGYNELPSIPQELAHNMSNLR.[M]	1×Oxidation [M17]; 1×HexNAc [N/S]	FALSE	0.051	0.0028	1	5	1	1	A0A0B4KHG5	A0A0B4KHG5 [945-965]		0	2615.28	0.010; 0.010	;	198585; ;	576	High	0.001999	0.04418	2.2	76.6
96	1	High	[R].LFTDILFKNSTQESLDLHRK.[Y]	1×HexNAc [T/N/S]	FALSE	0.0004	0.0031	1	1	1	2	P08171	P08171 [412-431]	2608.36				260	NoQuanValues	Light	0.0001291	3.73
	2	High	[R].LFTDILFKNSTQESLDLHR.[K]	1×HexNAc [N/S/T]	FALSE	0.0013	0.0031	1	1	1	1	P08171	P08171 [412-430]	2480.27				259	NoQuanValues	Light	0.0004765	6.55
97	1	High	[R].LEAGTSNVSVHISNLAAQSGVSR.[F]	1×HexNAc [S/N/T]	FALSE	0.0072	0.0031	1	1	1	2	Q9VH78	Q9VH78 [371-393]	2500.26				248	NoQuanValues	Light	0.003211	3.13
98	1	High	[R].LAQCTPAADCHCQDAWNNTYACLR.[N]	4×Carbamidomethyl [C4; C10; C12; C22]; 1×HexNAc [N/T]	FALSE	0.048	0.0037	1	2	1	1	Q95R73	Q95R73 [405-428]	3099.28	0.010; 0.010	;	71951.40625; ;	239		Light	0.02638	2.46	64.74
99	1	High	[R].KANLTQLLSNDSR.[S]	2×HexNAc [N/T/S]	FALSE	0.077	0.0037	1	7	1	1	Q9VGE9	Q9VGE9 [675-687]	1865.95	0.010; 0.010	;	114297.5234375; ;	221		Light	0.045	1.67	56.95
100	1	High	[R].IVLNETNIVESR.[N]	1×HexNAc [N/T/S]	FALSE	0.00057	0.0011	1	1	1	4	M9PBU9	M9PBU9 [1858-1869]	1589.84	0.010; 0.010	;	4074735.75; ;	684		Light	0.0005914	2.36	64.96
	2	High	[R].IVLNETNIVESR.[N]	1×HexNAc [N/T/S]	FALSE	0.0071	0.0031	1	1	1	4	M9PBU9	M9PBU9 [1858-1869]	1589.84	0.010; 0.010	;	1725950; ;	341		Light	0.003167	2.6	65.25
	3	High	[R].IVLNETNIVESR.[N]	1×HexNAc [N/T/S]	FALSE	0.042	0.0065	1	1	1	4	M9PBU9	M9PBU9 [1858-1869]	1589.84	418438		High	High	0.001362	0.008571
101	1	High	[R].ITAGDGVKAHDLAGKAEISNTTNGQVFR.[L]	2×HexNAc [T/S/N]; 2×HexNAc(1)dHex(1) [S/N/T]	FALSE	0.1	0.0049	1	2	1	1	Q9I7S8	Q9I7S8 [44-71]	3974.91				330	NoQuanValues	Light	0.06381	4.71
102	1	High	[R].IRPNVTVVLDVNCQEKK.[Y]	1×Carbamidomethyl [C13]; 1×HexNAc [N/T]	FALSE	0.0099	0.0031	1	1	1	4	A1Z7Z6	A1Z7Z6 [140-156]	2215.18	0.010; 0.100	; 0.00	98300.0078125; ; 9827.2802734375	318		Light	0.004561	2.74	58.93
103	1	High	[R].IPPVNQTIR.[E]	1×HexNAc [N/T]	FALSE	0.0023	0.0011	1	1	1	3	Q9U4G1	Q9U4G1 [155-163]	1240.69	0.010; 0.010	;	1038047; ;	632		Light	0.002262	1.99	48.81
	2	High	[R].IPPVNQTIR.[E]	1×HexNAc [N/T]	FALSE	0.019	0.0037	1	1	1	3	Q9U4G1	Q9U4G1 [155-163]	1240.69	0.010; 0.010	;	611306.6875; ;	312		Light	0.009324	2.03	48.91
	3	High	[R].IPPVNQTIR.[E]	1×HexNAc [N/T]	FALSE	0.016	0.0065	1	1	1	4	Q9U4G1	Q9U4G1 [155-163]	1240.69	583199		High	High	0.001362	0.002251
104	1	High	[R].INVTTEFFGTNYNVFEASVR.[Q]	1×HexNAc [N/T/S]	FALSE	0.085	0.0037	1	1	1	1	Q9V496	Q9V496 [643-662]	2511.2				306	NoQuanValues	Light	0.05092	5.9
105	1	High	[R].INLDGSNR.[T]	1×HexNAc [S/N]	FALSE	0.13	0.0064	1	1	1	1	Q95RU0	Q95RU0 [184-191]	1091.53	0.594; 0.010	0.00;	19462.48828125; 11567.6474609375;	299		Light	0.08533	1.07	39.24
106	1	High	[R].ILDASDIHPDSNNTVAAINNAIVK.[A]	1×HexNAc [S/N/T]	FALSE	0.014	0.0031	1	1	1	1	Q9VSC3	Q9VSC3 [203-226]	2708.37				278	NoQuanValues	Light	0.006452	3.15
107	1	High	[R].IINGTTVDIAR.[H]	1×HexNAc [N/T]	FALSE	0.041	0.0037	1	1	1	1	A1Z8J7	A1Z8J7 [26-36]	1375.74	0.010; 0.010	;	89125.7109375; ;	286		Light	0.02232	1.74	57.06
108	1	High	[R].IDFSNSTGAEIECK.[A]	1×Carbamidomethyl [C13]; 1×HexNAc [S/N/T]	FALSE	0.036	0.0019	1	75	1	1	Q0E9L6	Q0E9L6 [49-62]	1773.78				534	NoQuanValues	Light	0.03171	1.03
109	1	High	[R].IAPQTNFTHVLVVRPK.[A]	1×HexNAc [T/N]	FALSE	0.14	0.0098	1	1	1	1	Q9VUZ0	Q9VUZ0 [88-103]		0	2023.13	0.010; 0.010	;	104640.4921875; ;	521	High	0.006652	0.1195	1.78	62.05
	2	High	[R].IAPQTNFTHVLVVRPK.[A]	1×HexNAc [T/N]	FALSE	0.00029	0.0031	1	1	1	4	Q9VUZ0	Q9VUZ0 [88-103]	2023.13	0.010; 0.010	;	1612581.15625; ;	238		Light	9.111e-05	4.43	61.52
	3	High	[R].IAPQTNFTHVLVVRPK.[A]	1×HexNAc [T/N]	FALSE	0.052	0.0065	1	1	1	3	Q9VUZ0	Q9VUZ0 [88-103]	2023.13	50925.6		High	High	0.001362	0.01158
110	1	High	[R].HVNPLNGNITEK.[H]	1×HexNAc [N/T]	FALSE	0.02	0.0037	1	1	1	2	Q9VXF6	Q9VXF6 [198-209]	1538.78	0.010; 0.010	;	103402.890625; ;	215		Light	0.009707	1.5	45.15
111	1	High	[R].HNETGEYQQK.[Y]	1×HexNAc [N/T]	FALSE	0.14	0.008	1	1	1	2	Q8IN49	Q8IN49 [618-627]	1436.63	0.010; 0.010	;	157205.5625; ;	211		Light	0.09143	1.38	22.47
112	1	High	[R].HAVDNGTLYPDTR.[C]	1×HexNAc [N/T]	FALSE	0.1	0.0049	1	1	1	2	B7Z031	B7Z031 [308-320]	1661.78	0.826; 0.010	0.00;	24480.212890625; 20228.677734375;	208		Light	0.06284	0.87	43.5
113	1	High	[R].GNITEQR.[N]	1×HexNAc [N/T]	FALSE	0.056	0.0037	1	1	1	2	Q9VF24	Q9VF24 [810-816]	1020.5	0.010; 0.010	;	94153.1484375; ;	196		Light	0.03169	0.82	25.84
114	1	High	[R].GEANNLQSATSATNQTLTDR.[A]	1×HexNAc [N/S/T]	FALSE	0.04	0.0037	1	1	1	1	P11046	P11046 [1690-1709]	2295.07				166	NoQuanValues	Light	0.02191	1.27
115	1	High	[R].FVVCPENISLAR.[D]	1×Carbamidomethyl [C4]; 1×HexNAc [N/S]	FALSE	0.0015	0.0011	1	1	1	1	A8DYL2	A8DYL2 [756-767]	1607.81	0.010; 0.059	; 0.00	682786.125; ; 40172.53515625	336		Light	0.001526	2.31	74.61
	2	High	[R].FVVCPENISLAR.[D]	1×Carbamidomethyl [C4]; 1×HexNAc [N/S]	FALSE	0.012	0.0031	1	1	1	2	A8DYL2	A8DYL2 [756-767]	1607.81	0.010; 0.010	;	278476.125; ;	159		Light	0.005687	3.35	74.7
116	1	High	[R].FTNITR.[H]	1×HexNAc [N/T]	FALSE	0.19	0.0089	1	1	1	1	Q9VWZ7	Q9VWZ7 [494-499]	954.489	0.010; 0.010	;	225699.125; ;	158		Light	0.1251	1.34	36.98
117	1	High	[R].FTGQPSNVTGQAK.[V]	1×HexNAc [N/T/S]	FALSE	0.029	0.0065	1	2	1	3	Q8SXR1	Q8SXR1 [90-102]	1537.75	939688		High	High	0.001362	0.005146
118	1	High	[R].FINVTKEEFISVPR.[D]	1×HexNAc [N/T/S]	FALSE	0.0044	0.0031	1	1	1	1	Q24298	Q24298 [947-960]	1882				149	NoQuanValues	Light	0.00183	3.15
119	1	High	[R].FHEEFLSGYNYNTNVTEANR.[Q]	1×HexNAc [T/N/S]	FALSE	0.01	0.0031	1	1	1	1	M9PCE8	M9PCE8 [49-68]	2608.16	0.010; 0.010	;	164162.03125; ;	147		Light	0.004663	3.98	69.55
120	1	High	[R].FGINSTIR.[D]	1×HexNAc [N/S/T]	FALSE	0.056	0.0037	1	1	1	2	Q7KTG2	Q7KTG2 [1725-1732]	1110.58	0.010; 0.010	;	224786.34375; ;	146		Light	0.03161	1.19	55.73
	2	High	[R].FGINSTIR.[D]	1×HexNAc [N/S/T]	FALSE	0.22	0.0065	1	1	1	1	Q7KTG2	Q7KTG2 [1725-1732]	1110.58	110927		High	High	0.001362	0.08798
121	1	High	[R].EVLCLSNGTK.[S]	1×Carbamidomethyl [C4]; 1×HexNAc [N/T/S]	FALSE	0.0098	0.0011	1	1	1	3	Q868Z9	Q868Z9 [663-672]	1323.65	0.010; 0.010	;	1119720.75; ;	309		Light	0.009106	2.53	49.9
	2	High	[R].EVLCLSNGTK.[S]	1×Carbamidomethyl [C4]; 1×HexNAc [N/T/S]	FALSE	0.019	0.0037	1	1	1	4	Q868Z9	Q868Z9 [663-672]	1323.65	0.010; 0.010	;	3983288.5; ;	143		Light	0.009425	2.69	50.04
122	1	High	[R].ENLSQFVNDPK.[Y]	1×HexNAc [N/S]	FALSE	0.0079	0.0011	1	1	1	1	P11997	P11997 [241-251]	1493.71	0.010; 0.010	;	182165.34375; ;	281		Light	0.007424	1.76	62.6
123	1	High	[R].ENITQPR.[G]	1×HexNAc [N/T]	FALSE	0.023	0.0011	1	1	1	3	A8JTM7	A8JTM7 [1671-1677]	1060.53	0.010; 0.010	;	102631.78125; ;	282		Light	0.0209	1.08	31.9
	2	High	[R].ENITQPR.[G]	1×HexNAc [N/T]	FALSE	0.17	0.0089	1	1	1	1	A8JTM7	A8JTM7 [1671-1677]	1060.53	0.010; 0.010	;	615913.75; ;	134		Light	0.11	1.03	31.88
	3	High	[R].ENITQPR.[G]	1×HexNAc [N/T]	FALSE	0.071	0.0065	1	1	1	5	A8JTM7	A8JTM7 [1671-1677]	1060.53	255283		High	High	0.001362	0.01789
124	1	High	[R].EEFHEFSGLNDSR.[L]	1×HexNAc [N/S]	FALSE	0.15	0.0089	1	5	1	1	Q9W581	Q9W581 [765-777]	1769.76	0.010; 0.010	;	122148.6484375; ;	108		Light	0.09454	1.72	58.01
125	1	High	[R].EDCNTTLHSR.[A]	1×Carbamidomethyl [C3]; 1×HexNAc [N/T/S]	FALSE	0.097	0.0049	1	1	1	2	Q9VJ45	Q9VJ45 [110-119]	1435.61	0.010; 0.010	;	137452.046875; ;	107		Light	0.05913	1.7	25.66
126	1	High	[R].DSAVDDSVDDSVEVTTVTPSHEPK.[H]	2×HexNAc [T/S]	FALSE	0.0035	0.0011	1	1	1	1	Q09332	Q09332 [1521-1544]		0	2935.31	0.010; 0.010	;	65509.84375; ;	198	High	0.0008681	0.003375	2.75	57.64
127	1	High	[R].DQENNTLFR.[Q]	1×HexNAc [N/T]	FALSE	0.12	0.0085	1	3	1	1	M9PBK6	M9PBK6 [573-581]	1339.61	100.000; 100.000	;	; 16445.447265625; 44863.17578125	194		Light	0.09868	0.98	54.38
128	1	High	[R].DNNTHVGCAALR.[F]	1×Carbamidomethyl [C8]; 1×HexNAc [N/T]	FALSE	0.001	0.0031	1	1	1	3	Q9VT84	Q9VT84 [197-208]	1530.7	0.086; 0.010	0.00;	249579.734375; 21339.408203125;	87		Light	0.0003709	2.6	38.11
129	1	High	[R].DNHTSLELK.[T]	1×HexNAc [N/T/S]	FALSE	0.14	0.0098	1	1	1	1	P22815	P22815 [484-492]	1259.61	0.010; 0.010	;	96094.7734375; ;	188		Light	0.1164	1.22	40.22
130	1	High	[R].DNGSYYSYESIPYAEPPTGDLR.[F]	1×HexNAc [N/S/T]	FALSE	0.059	0.0028	1	1	1	1	P08171	P08171 [41-62]	2697.18				187	NoQuanValues	Light	0.05124	1.48
131	1	High	[R].DENGGVLPVNFTEPTAVDNSGSIAR.[L]	1×HexNAc [N/T/S]	FALSE	0.041	0.0019	1	2	1	1	E1JHA6	E1JHA6 [1483-1507]	2762.31	0.010; 0.010	;	33565.02734375; ;	157		Light	0.03639	1.24	87.07
132	1	High	[R].DALHNITDTHISGAIK.[G]	1×HexNAc [N/T/S]	FALSE	0.034	0.0037	1	1	1	4	M9NDE3	M9NDE3 [2310-2325]	1908.97	0.010; 0.010	;	165116.75; ;	69		Light	0.01837	1.56	58.44
133	1	High	[R].CNVTNTNFNGNYK.[C]	1×Carbamidomethyl [C1]; 1×HexNAc [N/T]	FALSE	0.057	0.0037	1	2	1	1	M9PCE5	M9PCE5 [332-344]	1748.75	0.010; 0.010	;	36455.30078125; ;	66		Light	0.03244	1.55	47.5
134	1	High	[R].CGDPFEPYSIGEVNCSK.[Q]	2×Carbamidomethyl [C1; C15]; 1×HexNAc [N/S]	FALSE	0.0001	0.0011	1	1	1	1	Q7K188	Q7K188 [37-53]		0	2161.91	0.010; 0.010	;	327292.0625; ;	142	High	0.0008681	0.0001128	3.6	75.29
135	1	High	[R].CFATGNPAPNITWSLK.[N]	1×Carbamidomethyl [C1]; 1×HexNAc [N/T/S]	FALSE	0.1	0.0078	1	1	1	1	Q868Z9	Q868Z9 [2543-2558]	1979.95				141	NoQuanValues	Light	0.08691	1.14
	1	High	[R].CFATGNPAPNITWSLK.[N]	1×Carbamidomethyl [C1]; 1×HexNAc [N/T/S]	FALSE	0.0016	0.0031	1	1	1	1	Q868Z9	Q868Z9 [2543-2558]	1979.95				63	NoQuanValues	Light	0.0005981	3.57
136	1	High	[R].AYFTSATMIIAVPTGIK.[I]	2×HexNAc(1)dHex(1) [T/S]	FALSE	0.1	0.007	1	1	1	1	P00399	P00399 [301-317]		0	2482.24	0.010; 0.010	;	27054.423828125; ;	136	High	0.004802	0.08611	1.29	36.93
137	1	High	[R].ARQNYTILDQITENAKK.[E]	1×HexNAc [N/T]	FALSE	0.013	0.0031	1	1	1	3	P15215	P15215 [1153-1169]	2209.15	0.010; 0.044	; 0.00	227688.640625; ; 10072.73046875	50		Light	0.006416	4.32	63.38
138	1	High	[R].APAVTTNR.[T]	1×HexNAc [T/N]	FALSE	0.052	0.0028	1	1	1	1	Q9VR48	Q9VR48 [288-295]		0	1032.53	0.010; 0.010	;	23532.037109375; ;	96	High	0.001999	0.04555	1.22	27.7
139	1	High	[R].ANKWNGSDVQVLQR.[T]	1×HexNAc [N/S]	FALSE	0.039	0.0037	1	2	1	1	A0A0B4KFD1	A0A0B4KFD1 [1603-1616]	1817.91	0.010; 0.010	;	59681.01171875; ;	39		Light	0.02087	2.03	53.34
140	1	High	[R].AEYVLPNITSK.[Y]	1×HexNAc [N/T/S]	FALSE	0.085	0.0063	1	1	1	1	Q7KJ08	Q7KJ08 [651-661]	1437.75	0.010; 0.010	;	108334.6640625; ;	47		Light	0.07313	0.73	67.24
141	1	High	[R].ACDCGAASNSTQCDPHTGHCACK.[S]	5×Carbamidomethyl [C2; C4; C13; C20; C22]; 1×HexNAc [S/N/T]	FALSE	0.0072	0.0031	1	1	1	1	Q00174	Q00174 [2016-2038]	2768.02	0.010; 0.010	;	393520.75; ;	9		Light	0.003226	3.47	29.14
142	1	High	[R].AAPGGCCDVVLDREQFLNATKK.[D]	2×Carbamidomethyl [C6; C7]; 1×HexNAc [N/T]	FALSE	0.041	0.0037	1	7	1	2	E1JGP2	E1JGP2 [62-83]	2652.28	0.010; 0.010	;	439463.59375; ;	7		Light	0.02207	2.53	61.31
143	1	High	[R].AAPGGCCDVVLDREQFLNATK.[K]	2×Carbamidomethyl [C6; C7]; 1×HexNAc [N/T]	FALSE	0.12	0.0049	1	7	1	1	E1JGP2	E1JGP2 [62-82]	2524.18	0.010; 0.010	;	99242.875; ;	6		Light	0.07139	1.46	67.67
144	1	High	[K].YTNYSAVQDLHR.[R]	1×HexNAc [T/N/S]	FALSE	0.0077	0.0011	1	3	1	2	E1JI40	E1JI40 [258-269]		0	1669.78	0.010; 0.010	;	219491.46875; ;	1206	High	0.0008681	0.00714	2.32	49.15
	2	High	[K].YTNYSAVQDLHR.[R]	1×HexNAc [T/N/S]	FALSE	0.00025	0.0031	1	3	1	6	E1JI40	E1JI40 [258-269]	1669.78	0.010; 0.010	;	992047.1953125; ;	661		Light	7.62e-05	3.7	49.28
145	1	High	[K].YNFSNYR.[A]	1×HexNAc [N/S]	FALSE	0.17	0.0089	1	1	1	1	Q9VZ58	Q9VZ58 [217-223]	1166.51	0.010; 0.010	;	122551.8046875; ;	649		Light	0.1129	1.17	52.34
146	1	High	[K].YGSSSSYDFYWEANSTNLEKPGSEYDNKIR.[Q]	1×HexNAc [N/S/T]	FALSE	0.099	0.0049	1	1	1	1	P12080	P12080 [770-799]	3710.64				642	NoQuanValues	Light	0.06061	3.1
147	1	High	[K].YENDTLPNKPPNLHIR.[K]	1×HexNAc [N/T]	FALSE	0.016	0.0037	1	1	1	2	Q9VJ45	Q9VJ45 [328-343]	2124.07	0.010; 0.010	;	84313; ;	638		Light	0.008033	3.14	55.91
148	1	High	[K].VYGNETFPLHLDHGR.[G]	1×HexNAc [N/T]	FALSE	0.025	0.0037	1	2	1	1	A0A4D6K5D6	A0A4D6K5D6 [869-883]	1957.94	100.000;	;	; 20680.1796875;	629		Light	0.01271	1.86	61.93
149	1	High	[K].VVLPENGTAR.[G]	1×HexNAc [N/T]	FALSE	0.12	0.0091	1	1	1	1	Q9VPQ8	Q9VPQ8 [196-205]	1258.66	0.010; 0.010	;	239780.5; ;	1160		Light	0.1029	1.41	44.1
150	1	High	[K].VSLNGPSYNETK.[Q]	1×HexNAc [N/T/S]	FALSE	0.013	0.0031	1	5	1	1	Q8IPH5	Q8IPH5 [54-65]	1511.72	0.010; 0.010	;	318824.0625; ;	619		Light	0.006169	2.52	48.2
151	1	High	[K].VSGVSNYTVR.[S]	1×HexNAc [N/T/S]	FALSE	0.03	0.0019	1	1	1	1	Q9VC10	Q9VC10 [236-245]	1284.64	0.010; 0.010	;	87565.171875; ;	1148		Light	0.02686	1.22	44.65
	2	High	[K].VSGVSNYTVR.[S]	1×HexNAc [N/T/S]	FALSE	0.0039	0.0031	1	1	1	2	Q9VC10	Q9VC10 [236-245]	1284.64	0.010; 0.010	;	482320.34375; ;	618		Light	0.001618	2.18	44.79
152	1	High	[K].VNIVENDNGTLSYNLRK.[I]	1×HexNAc [N/T/S]	FALSE	0.052	0.0037	1	3	1	1	Q9W0X0	Q9W0X0 [142-158]	2152.09	0.010; 0.111	; 0.00	121240.7734375; ; 13459.2744140625	609		Light	0.02923	2.06	61.25
153	1	High	[K].VKEEVCTNKTQR.[A]	1×Carbamidomethyl [C6]; 1×HexNAc [T/N]	FALSE	0.11	0.0049	1	1	1	1	Q7JW48	Q7JW48 [157-168]	1694.84	0.010; 0.010	;	63028.5234375; ;	594		Light	0.06599	1.58	25
154	1	High	[K].VKEEVCTNK.[T]	1×Carbamidomethyl [C6]; 1×HexNAc [T/N]	FALSE	0.068	0.0037	1	1	1	1	Q7JW48	Q7JW48 [157-165]	1309.63	0.010; 0.010	;	300693.3125; ;	593		Light	0.03934	1.54	23.87
155	1	High	[K].VEDLNSTAVR.[I]	1×HexNAc [N/S/T]	FALSE	0.06	0.0037	1	1	1	2	Q9VFE2	Q9VFE2 [494-503]	1306.65	0.010; 0.010	;	71269.6015625; ;	590		Light	0.03415	1.4	43.09
156	1	High	[K].VEAINSTAAR.[C]	1×HexNAc [N/S/T]	FALSE	0.13	0.0091	1	4	1	1	X2JDR3	X2JDR3 [810-819]	1234.63				1087	NoQuanValues	Light	0.1119	1.14
157	1	High	[K].VDTNASDHVR.[R]	1×HexNAc [T/N/S]	FALSE	0.065	0.0037	1	1	1	1	Q9VAR7	Q9VAR7 [316-325]	1316.61	0.010; 0.010	;	241349.734375; ;	588		Light	0.0373	1.75	28.1
158	1	High	[K].VCVLLGANESDAR.[A]	1×Carbamidomethyl [C2]; 1×HexNAc [N/S]	FALSE	0.049	0.0037	1	1	1	2	Q9W5Y0	Q9W5Y0 [298-310]	1606.77	0.010; 0.010	;	59975.4765625; ;	586		Light	0.02723	2.28	59.95
159	1	High	[K].VAYNNITK.[L]	1×HexNAc [N/T]	FALSE	0.086	0.0063	1	1	1	1	Q9VS84	Q9VS84 [445-452]	1125.58				1079	NoQuanValues	Light	0.07387	1.06
160	1	High	[K].TYLQSLNSTKK.[A]	1×HexNAc [S/N/T]	FALSE	0.15	0.0089	1	1	1	1	Q7KK54	Q7KK54 [551-561]	1485.78	0.010; 0.010	;	51889.26171875; ;	581		Light	0.0933	1.33	42.27
161	1	High	[K].TTPAAPTPTSNSATVPTGTAATAGGATGTTPVVKK.[H]	1×HexNAc [T/S/N]	FALSE	0.066	0.0037	1	2	1	1	A0A0B4LH64	A0A0B4LH64 [761-795]		1	3385.73	0.010; 0.010	;	131249.59375; ;	1054	High	0.00262	0.05753	2.62	55.35
162	1	High	[K].TDFNFTTNNGK.[S]	1×HexNAc [T/N]	FALSE	0.1	0.0078	1	1	1	1	Q7KTG2	Q7KTG2 [2771-2781]		0	1461.65	0.010; 0.215	; 0.00	100759.8984375; ; 21699.15625	995	High	0.005332	0.08744	1.16	54.9
	2	High	[K].TDFNFTTNNGK.[S]	1×HexNAc [N/T]	FALSE	0.023	0.0037	1	1	1	3	Q7KTG2	Q7KTG2 [2771-2781]	1461.65	0.010; 0.010	;	145912.625; ;	542		Light	0.01177	2.05	55.08
163	1	High	[K].TCVANCTAGQHLCGGRDEK.[C]	3×Carbamidomethyl [C2; C6; C13]; 1×HexNAc [T/N]	FALSE	0.002	0.0031	1	1	1	2	A8JTM7	A8JTM7 [3658-3676]	2337	0.010; 0.010	;	257435.5; ;	541		Light	0.0007668	3.22	37.15
164	1	High	[K].TAPAGEQQSPWYNATR.[S]	1×HexNAc [N/T/S]	FALSE	0.0015	0.0031	1	1	1	2	Q9VLY7	Q9VLY7 [1132-1147]	1979.91	0.010; 0.010	;	65955.0703125; ;	535		Light	0.0005471	2.41	57.32
165	1	High	[K].STFNETLR.[S]	1×HexNAc [N/T/S]	FALSE	0.13	0.0049	1	1	1	1	Q9Y136	Q9Y136 [402-409]	1170.56	0.010; 0.010	;	136202.34375; ;	528		Light	0.08056	1.18	47.33
166	1	High	[K].STEKEDIGNYSCQLSNNIGK.[G]	1×Carbamidomethyl [C12]; 1×HexNAc [S/T/N]	FALSE	0.12	0.0049	1	6	1	1	Q9VNP2	Q9VNP2 [441-460]	2460.12	0.010; 0.010	;	46901.703125; ;	526		Light	0.07307	2.38	58.32
167	1	High	[K].SSNFSGIPLLTGVTK.[H]	1×HexNAc [S/N/T]	FALSE	0.023	0.0011	1	1	1	1	Q9VPZ5	Q9VPZ5 [361-375]		0	1723.91	0.010; 0.010	;	63902.640625; ;	950	High	0.0008681	0.02042	1.52	85.56
168	1	High	[K].SRNITGETGQVAFDDNGDR.[I]	1×HexNAc [S/N/T]	FALSE	0.0047	0.0031	1	1	1	1	Q24418	Q24418 [343-361]	2255.02	0.568; 0.010	0.00;	72374.8984375; 41139.1328125;	515		Light	0.001993	3	51.44
169	1	High	[K].SQSHCNLTIDNNVYK.[E]	1×Carbamidomethyl [C5]; 1×HexNAc [S/N/T]	FALSE	0.013	0.0031	1	1	1	2	Q7KTG2	Q7KTG2 [264-278]	1995.91	0.010; 0.069	; 0.00	176720.859375; ; 12175.66015625	511		Light	0.005931	2.69	48.45
170	1	High	[K].SNYTLNLR.[W]	1×HexNAc [S/N/T]	FALSE	0.058	0.0028	1	2	1	1	Q0KI25	Q0KI25 [227-234]		0	1183.6	0.010; 0.010	;	496049.28125; ;	930	High	0.001999	0.05081	1.43	55.36
	2	High	[K].SNYTLNLR.[W]	1×HexNAc [S/N/T]	FALSE	0.058	0.0028	1	2	1	1	Q0KI25	Q0KI25 [227-234]		0	1183.6	0.010; 0.010	;	496049.28125; ;	930	High	0.001999	0.05081	1.43	55.36
	3	High	[K].SNYTLNLR.[W]	1×HexNAc [S/N/T]	FALSE	0.1	0.0049	1	2	1	2	Q0KI25	Q0KI25 [227-234]	1183.6	0.010; 0.010	;	1176707; ;	508		Light	0.06077	1.48	55.48
	4	High	[K].SNYTLNLR.[W]	1×HexNAc [S/N/T]	FALSE	0.056	0.0065	1	2	1	3	Q0KI25	Q0KI25 [227-234]	1183.6	322136		High	High	0.001362	0.01276
171	1	High	[K].SFNTTLTPIVAAHASQGASAK.[Q]	1×HexNAc [S/N/T]	FALSE	6e-06	0.0031	1	1	2	3	E2QCS7	E2QCS7 [956-976]	2275.16	0.010; 0.010	;	1776125.125; ;	490		Light	1.198e-06	6.48	63.29
172	1	High	[K].SEESTKQDTEAKNETIK.[L]	1×HexNAc [N/T/S]	FALSE	0.12	0.0049	1	1	1	1	O46067	O46067 [613-629]	2141.01	0.010; 0.010	;	153703.265625; ;	487		Light	0.07438	1.1	26.86
173	1	High	[K].SCDCNGNVDPNAVGNCNR.[T]	3×Carbamidomethyl [C2; C4; C16]; 1×HexNAc [N/S]	FALSE	0.18	0.0089	1	1	1	3	P15215	P15215 [846-863]	2225.86	0.010; 0.010	;	140259.5625; ;	481		Light	0.1217	1.75	42.44
174	1	High	[K].RNFTLLLEPASK.[S]	1×HexNAc [N/T/S]	FALSE	0.04	0.0037	1	1	1	1	Q7KTG2	Q7KTG2 [3791-3802]	1591.87	0.010; 0.010	;	115611.203125; ;	473		Light	0.02147	2.33	67.57
175	1	High	[K].QVNQTLNHLK.[S]	1×HexNAc [N/T]	FALSE	0.046	0.0019	1	4	1	2	A0A0B4LGM0	A0A0B4LGM0 [735-744]	1397.74	0.010; 0.010	;	609219.125; ;	846		Light	0.04002	2.02	36.79
	2	High	[K].QVNQTLNHLK.[S]	1×HexNAc [N/T]	FALSE	0.12	0.0049	1	4	1	2	A0A0B4LGM0	A0A0B4LGM0 [735-744]	1397.74	0.010; 0.010	;	246003; ;	465		Light	0.07612	1.15	36.64
	3	High	[K].QVNQTLNHLK.[S]	1×HexNAc [N/T]	FALSE	0.19	0.0065	1	4	1	1	A0A0B4LGM0	A0A0B4LGM0 [735-744]	1397.74	69299.7		High	High	0.001362	0.06814
176	1	High	[K].QTCNLTLR.[S]	1×Carbamidomethyl [C3]; 1×HexNAc [N/T]	FALSE	0.035	0.0037	1	1	1	2	Q9VJ46	Q9VJ46 [115-122]	1208.59	0.010; 0.010	;	1845897.625; ;	458		Light	0.0189	1.73	44.17
177	1	High	[K].QSLRPNETNVVWVSCEGENPADVENIKAR.[D]	1×Carbamidomethyl [C15]; 1×HexNAc [S/N/T]	FALSE	0.00073	0.0031	1	2	1	2	M9PDX8	M9PDX8 [218-246]	3514.69	0.010; 0.010	;	155585.421875; ;	455		Light	0.0002493	4.56	68.6
178	1	High	[K].QSLRPNETNVVWVSCEGENPADVENIK.[A]	1×Carbamidomethyl [C15]; 1×HexNAc [S/N/T]	FALSE	2.9e-07	0.0011	1	2	1	2	M9PDX8	M9PDX8 [218-244]	3287.55	0.010; 0.010	;	673729.375; ;	835		Light	3.954e-07	6.43	73.31
	2	High	[K].QSLRPNETNVVWVSCEGENPADVENIK.[A]	1×Carbamidomethyl [C15]; 1×HexNAc [S/N/T]	FALSE	6.5e-06	0.0031	1	2	1	1	M9PDX8	M9PDX8 [218-244]	3287.55	0.010; 0.010	;	911461.1875; ;	454		Light	1.292e-06	7.93	73.38
179	1	High	[K].QPNDTTFDVNKNR.[L]	1×HexNAc [N/T]	FALSE	0.0035	0.0011	1	1	1	1	Q9VN14	Q9VN14 [367-379]	1751.82	0.010; 0.244	; 0.00	82056.1015625; ; 20061.55859375	826		Light	0.003408	2.31	40.24
	2	High	[K].QPNDTTFDVNKNR.[L]	1×HexNAc [N/T]	FALSE	0.00098	0.0031	1	1	1	1	Q9VN14	Q9VN14 [367-379]	1751.82	0.010; 0.010	;	157730.046875; ;	450		Light	0.0003471	2.94	40.18
180	1	High	[K].QNISDLSVCDTDQK.[E]	1×Carbamidomethyl [C9]; 1×HexNAc [N/S/T]	FALSE	0.0099	0.0011	1	1	1	1	Q9VCI4	Q9VCI4 [444-457]	1825.81	0.337; 0.329	0.00; 0.00	67010.7890625; 22571.828125; 22074.150390625	822		Light	0.009156	1.62	55.65
	2	High	[K].QNISDLSVCDTDQK.[E]	1×Carbamidomethyl [C9]; 1×HexNAc [S/T/N]	FALSE	0.004	0.0031	1	1	1	2	Q9VCI4	Q9VCI4 [444-457]	1825.81	0.010; 0.010	;	86944.6875; ;	445		Light	0.001663	2.33	55.81
181	1	High	[K].QNATATVVLHQQR.[Y]	1×HexNAc [N/T]	FALSE	0.17	0.0089	1	5	1	1	Q8IPH5	Q8IPH5 [317-329]	1668.87	0.010; 0.010	;	55018.4140625; ;	444		Light	0.1108	0.98	40.33
182	1	High	[K].QLSNVAANASVSVSSLR.[Q]	1×HexNAc [S/N]	FALSE	0.088	0.0037	1	1	1	1	Q7K1H9	Q7K1H9 [133-149]	1905.99				443	NoQuanValues	Light	0.05276	1.57
183	1	High	[K].NYVFNVTNAEEFR.[S]	1×HexNAc [N/T]	FALSE	0.0039	0.0031	1	1	1	1	Q9W0X1	Q9W0X1 [62-74]	1805.83				423	NoQuanValues	Light	0.001618	2.99
184	1	High	[K].NTVNALLTR.[T]	1×HexNAc [N/T]	FALSE	0.17	0.0089	1	1	1	1	Q5BIG2	Q5BIG2 [175-183]	1204.65	0.010; 0.010	;	103640.84375; ;	417		Light	0.112	1.15	56.23
185	1	High	[K].NTHEIATPDGNLTTSVLTFTPTIDDR.[G]	1×HexNAc [S/T/N]	FALSE	0.0043	0.0011	1	4	1	1	A8DYJ6	A8DYJ6 [322-347]		0	3032.47				775	High	0.0008681	0.004149	2.51
186	1	High	[K].NSTQESLDLHR.[K]	1×HexNAc [T/S/N]	FALSE	0.00024	0.0011	1	1	1	3	P08171	P08171 [420-430]		0	1502.71	0.010; 0.010	;	697952.25; ;	771	High	0.0008681	0.000256	3.39	39.97
	2	High	[K].NSTQESLDLHR.[K]	1×HexNAc [T/S/N]	FALSE	0.00072	0.0031	1	1	1	5	P08171	P08171 [420-430]	1502.71	0.010; 0.010	;	1970645.875; ;	413		Light	0.0002457	3.7	39.98
	3	High	[K].NSTQESLDLHR.[K]	1×HexNAc [N/S/T]	FALSE	0.00081	0.0065	1	1	1	14	P08171	P08171 [420-430]	1502.71	1.159e+06		High	High	0.001362	3.874e-05
187	1	High	[K].NNSGASPSLYSGGPGYR.[F]	1×HexNAc [N/S]	FALSE	0.096	0.007	1	2	1	1	A1Z979	A1Z979 [73-89]	1886.85	0.010; 0.010	;	68119.125; ;	759		Light	0.08258	1.31	54.42
	2	High	[K].NNSGASPSLYSGGPGYR.[F]	1×HexNAc [N/S]	FALSE	0.012	0.0031	2	2	1	2	A1Z979; Q4V4H7	A1Z979 [73-89]; Q4V4H7 [73-89]	1886.85	0.010; 0.010	;	240961.296875; ;	403	NotUnique	Light	0.005605	2.59	54.52
188	1	High	[K].NNSEVIGNR.[L]	1×HexNAc [N/S]	FALSE	0.15	0.0089	1	1	1	2	Q7JRC3	Q7JRC3 [56-64]	1205.58	0.010; 0.010	;	131213.8125; ;	402		Light	0.09906	1.3	31.97
189	1	High	[K].NLTYSVR.[E]	1×HexNAc [N/T/S]	FALSE	0.094	0.0049	1	1	1	1	Q8IN25	Q8IN25 [94-100]	1055.54	0.010; 0.010	;	231203.0625; ;	391		Light	0.05684	1.26	45.5
190	1	High	[K].NLTVDFLGNVKR.[G]	1×HexNAc [N/T]	FALSE	0.0067	0.0031	1	5	1	1	Q9VZ96	Q9VZ96 [1000-1011]	1578.85				390	NoQuanValues	Light	0.002957	2.53
191	1	High	[K].NLTSEVGVSR.[S]	1×HexNAc [N/T/S]	FALSE	0.0042	0.0011	1	4	1	1	A0A0B4LGM0	A0A0B4LGM0 [382-391]	1264.64	100.000;	;	; 34269.625;	751		Light	0.003983	1.53	49.27
192	1	High	[K].NLTLSR.[K]	1×HexNAc [N/T/S]	FALSE	0.1	0.0065	1	1	1	2	Q9VAG3	Q9VAG3 [123-128]	906.489	248210		High	High	0.001362	0.02931
193	1	High	[K].NLTIFQR.[L]	1×HexNAc [N/T]	FALSE	0.11	0.0049	1	7	1	2	Q9VGE9	Q9VGE9 [519-525]	1094.58	0.010; 0.010	;	390683.40625; ;	388		Light	0.0689	1.35	62.59
	2	High	[K].NLTIFQR.[L]	1×HexNAc [N/T]	FALSE	0.15	0.0065	1	7	1	4	Q9VGE9	Q9VGE9 [519-525]	1094.58	399413		High	High	0.001362	0.04893
194	1	High	[K].NLTIDESR.[I]	1×HexNAc [T/S/N]	FALSE	0.005	0.0011	1	1	1	1	Q95SR0	Q95SR0 [77-84]		0	1150.56	0.010; 0.010	;	98734.5078125; ;	750	High	0.0008681	0.004742	1.33	44
	2	High	[K].NLTIDESR.[I]	1×HexNAc [N/T/S]	FALSE	0.12	0.0049	1	1	1	1	Q95SR0	Q95SR0 [77-84]	1150.56	0.010; 0.010	;	146637.578125; ;	387		Light	0.07805	1.3	44.15
195	1	High	[K].NLTELGR.[H]	1×HexNAc [N/T]	FALSE	0.008	0.0011	1	1	1	3	Q7KMM4	Q7KMM4 [433-439]	1005.52	0.010; 0.010	;	999063.375; ;	748		Light	0.007468	1.25	45.85
	2	High	[K].NLTELGR.[H]	1×HexNAc [N/T]	FALSE	0.11	0.0049	1	1	1	2	Q7KMM4	Q7KMM4 [433-439]	1005.52	0.010; 0.010	;	1933464.5; ;	384		Light	0.0708	1.33	45.94
	3	High	[K].NLTELGR.[H]	1×HexNAc [N/T]	FALSE	0.039	0.0065	1	1	1	7	Q7KMM4	Q7KMM4 [433-439]	1005.52	990497		High	High	0.001362	0.007715
196	1	High	[K].NLSVSATGR.[G]	1×HexNAc [N/S/T]	FALSE	0.16	0.0089	1	1	1	1	Q9VLY7	Q9VLY7 [1249-1257]	1107.56	0.010; 0.010	;	249143.9375; ;	382		Light	0.1047	1.02	39.46
197	1	High	[K].NLSIPR.[N]	1×HexNAc [N/S]	FALSE	0.067	0.0065	1	1	2	2	Q961J5	Q961J5 [68-73]	902.494	192436		High	High	0.001362	0.0164
198	1	High	[K].NKTEQDDIKR.[A]	1×HexNAc [N/T]	FALSE	0.15	0.0089	1	2	1	1	Q8IMH4	Q8IMH4 [716-725]	1449.72	0.010; 0.010	;	45531.31640625; ;	374		Light	0.09733	1.18	22.17
199	1	High	[K].NCTAPITAK.[E]	1×Carbamidomethyl [C2]; 1×HexNAc [N/T]	FALSE	0.056	0.0028	1	3	1	1	P10040	P10040 [2066-2074]	1178.57	100.000;	;	; 25741.09765625;	717		Light	0.04915	0.99	33.7
	2	High	[K].NCTAPITAK.[E]	1×Carbamidomethyl [C2]; 1×HexNAc [N/T]	FALSE	0.037	0.0037	1	3	1	1	P10040	P10040 [2066-2074]	1178.57	0.010; 0.010	;	342023.8125; ;	355		Light	0.02011	1.29	33.71
200	1	High	[K].NATEYCQTIQTAGK.[Y]	1×Carbamidomethyl [C6]; 1×HexNAc [N/T]	FALSE	0.044	0.0019	1	1	1	1	Q9VSQ7	Q9VSQ7 [149-162]	1787.81				715	NoQuanValues	Light	0.0383	1.29
201	2	High	[K].NANLTEPGK.[H]	1×HexNAc [N/T]	FALSE	0.021	0.0065	1	2	1	4	Q9Y102	Q9Y102 [95-103]	1146.56	440667		High	High	0.001362	0.003404
202	1	High	[K].MSNFDEQTNGTYK.[H]	1×HexNAc [T/N/S]	FALSE	0.0052	0.0011	1	1	1	1	Q9VLT3	Q9VLT3 [816-828]		0	1737.73	0.010; 0.010	;	128718.796875; ;	705	High	0.0008681	0.004931	2.67	47.12
203	1	High	[K].MNGSLFFAK.[V]	1×Oxidation [M1]; 1×HexNAc [N/S]	FALSE	0.012	0.0011	1	1	2	2	Q9U4G1	Q9U4G1 [299-307]		0	1233.58	0.010; 0.010	;	217130.15625; ;	699	High	0.0008681	0.0107	1.27	62.92
204	1	High	[K].LYNDTLADISTR.[L]	1×HexNAc [N/T/S]	FALSE	0.0024	0.0011	1	1	1	2	Q9VV72	Q9VV72 [232-243]	1584.78	0.010; 0.010	;	300741.1875; ;	690		Light	0.002335	1.44	66.36
	2	High	[K].LYNDTLADISTR.[L]	1×HexNAc [N/T/S]	FALSE	0.023	0.0037	1	1	1	2	Q9VV72	Q9VV72 [232-243]	1584.78	0.010; 0.010	;	117929.203125; ;	345		Light	0.01181	1.96	66.64
	3	High	[K].LYNDTLADISTR.[L]	1×HexNAc [N/T/S]	FALSE	0.02	0.0065	1	1	1	5	Q9VV72	Q9VV72 [232-243]	1584.78	122765		High	High	0.001362	0.003096
205	1	High	[K].LSQNASAQYR.[G]	1×HexNAc [S/N]	FALSE	0.069	0.0037	1	1	1	1	Q8MM24	Q8MM24 [343-352]	1340.64	0.010; 0.010	;	59956.3125; ;	327		Light	0.03976	1.31	34.07
206	1	High	[K].LPTFAGQSCNGSR.[S]	1×Carbamidomethyl [C9]; 1×HexNAc [N/S/T]	FALSE	1e-05	0.0011	1	1	1	3	Q9W3L4	Q9W3L4 [287-299]	1597.73	0.010; 0.010	;	716007.125; ;	635		Light	1.197e-05	4	51.82
	2	High	[K].LPTFAGQSCNGSR.[S]	1×Carbamidomethyl [C9]; 1×HexNAc [N/S/T]	FALSE	0.00015	0.0031	1	1	1	5	Q9W3L4	Q9W3L4 [287-299]	1597.73	0.010; 0.010	;	1447062.4453125; ;	313		Light	4.261e-05	4.07	51.97
207	1	High	[K].LPNCTGMTLVVGR.[K]	1×Carbamidomethyl [C4]; 1×Oxidation [M7]; 1×HexNAc [N/T]	FALSE	0.026	0.0019	1	1	1	1	Q9W3L4	Q9W3L4 [128-140]	1636.8	0.010; 0.010	;	193809.515625; ;	628		Light	0.02363	1.42	58.71
	2	High	[K].LPNCTGMTLVVGR.[K]	1×Carbamidomethyl [C4]; 1×HexNAc [N/T]	FALSE	0.01	0.0011	1	1	1	1	Q9W3L4	Q9W3L4 [128-140]	1620.81				627	NoQuanValues	Light	0.00955	1.26
208	1	High	[K].LNTIEVSAENGSNR.[L]	1×HexNAc [N/S/T]	FALSE	0.1	0.0078	1	1	1	1	A8JTM7	A8JTM7 [1652-1665]	1706.82	0.010; 0.010	;	235805.109375; ;	622		Light	0.08861	1.39	49.39
	2	High	[K].LNTIEVSAENGSNR.[L]	1×HexNAc [N/S/T]	FALSE	0.0017	0.0031	1	1	1	3	A8JTM7	A8JTM7 [1652-1665]	1706.82	0.010; 0.010	;	358604.1328125; ;	305		Light	0.0006504	3.57	49.53
	3	High	[K].LNTIEVSAENGSNR.[L]	1×HexNAc [N/S/T]	FALSE	0.022	0.0065	1	1	1	1	A8JTM7	A8JTM7 [1652-1665]	1706.82	43771.9		High	High	0.001362	0.003484
209	1	High	[K].LNSTYELGVQR.[T]	1×HexNAc [N/S/T]	FALSE	0.049	0.0037	1	1	1	1	Q9VMZ9	Q9VMZ9 [223-233]	1482.74	0.010; 0.010	;	76692.4765625; ;	304		Light	0.02703	1.5	56.22
210	1	High	[K].LNETGGVQLYPYR.[Y]	1×HexNAc [N/T]	FALSE	0.035	0.0037	1	4	1	2	Q9VIT9	Q9VIT9 [360-372]	1712.85				297	NoQuanValues	Light	0.01865	2.34
211	1	High	[K].LFNLSQTLDEIAR.[T]	1×HexNAc [N/S/T]	FALSE	0.0024	0.0011	1	1	1	1	P15215	P15215 [1068-1080]	1722.89	0.010; 0.010	;	119749.6796875; ;	556		Light	0.002314	1.95	97.49
212	1	High	[K].LEASKNETDVEVK.[L]	1×HexNAc [S/N/T]	FALSE	0.029	0.0019	1	1	2	2	Q9VWB4	Q9VWB4 [243-255]		1	1664.82	0.010; 0.010	;	212567.84375; ;	541	High	0.001448	0.02631	2	36.86
213	1	High	[K].LDDRQDIYNASGR.[I]	1×HexNAc [N/S]	FALSE	0.024	0.0011	1	2	1	1	A0A0B4K7Z1	A0A0B4K7Z1 [837-849]	1725.8	0.010; 0.010	;	141930.53125; ;	527		Light	0.02199	1.85	44.35
	2	High	[K].LDDRQDIYNASGR.[I]	1×HexNAc [N/S]	FALSE	0.0097	0.0031	1	2	1	2	A0A0B4K7Z1	A0A0B4K7Z1 [837-849]	1725.8	0.010; 0.010	;	191569.953125; ;	244		Light	0.004473	1.95	44.57
214	1	High	[K].LATGNYNLSAEGVSGVVFKNSTK.[L]	2×HexNAc [T/N/S]	FALSE	0.0022	0.0031	1	5	1	1	Q8IPH5	Q8IPH5 [84-106]	2762.37	0.010; 0.010	;	116202.6328125; ;	241		Light	0.0008413	2.96	70.63
215	1	High	[K].KDTPITCSPPTPENNHTLK.[C]	1×Carbamidomethyl [C7]; 1×HexNAc [N/T/S]	FALSE	0.00037	0.0031	1	1	1	3	P12080	P12080 [727-745]	2353.13	0.010; 0.010	;	493458.1796875; ;	223		Light	0.0001184	3.67	44.33
216	1	High	[K].ISAVNNATEHQLKDINK.[L]	1×HexNAc [N/T/S]	FALSE	0.0021	0.0011	1	1	1	1	Q00174	Q00174 [2533-2549]	2098.08	0.010; 0.010	;	370797.5; ;	653		Light	0.002092	3.82	46.16
	2	High	[K].ISAVNNATEHQLKDINK.[L]	1×HexNAc [S/N/T]	FALSE	0.0003	0.0031	1	1	1	6	Q00174	Q00174 [2533-2549]	2098.08	0.010; 0.010	;	1418580.8125; ;	320		Light	9.159e-05	5.13	46.12
217	1	High	[K].IPNDFECYNCTLR.[L]	2×Carbamidomethyl [C7; C10]; 1×HexNAc [N/T]	FALSE	0.099	0.0049	1	2	1	1	A0A0B4K7Z1	A0A0B4K7Z1 [130-142]	1904.82				310	NoQuanValues	Light	0.06002	1.59
218	1	High	[K].INNETGEREPPSNWNSEFR.[Y]	1×HexNAc [N/T/S]	FALSE	0.0026	0.0031	1	1	1	4	P07190	P07190 [149-167]	2479.11	0.010; 0.279	; 0.00	119177.046875; ; 33247.58203125	303		Light	0.001038	3.46	57.98
219	1	High	[K].IGSITNDCNVTTGECK.[C]	2×Carbamidomethyl [C8; C15]; 1×HexNAc [T/N/S]	FALSE	0.021	0.0011	1	1	1	1	Q00174	Q00174 [500-515]		0	1971.86	0.010; 0.010	;	189102.984375; ;	572	High	0.0008681	0.01895	1.9	48.66
	2	High	[K].IGSITNDCNVTTGECK.[C]	2×Carbamidomethyl [C8; C15]; 1×HexNAc [N/T/S]	FALSE	0.0018	0.0031	1	1	1	4	Q00174	Q00174 [500-515]	1971.86	0.010; 0.010	;	1351843.9375; ;	270		Light	0.0006634	3.79	48.84
220	1	High	[K].IGQEYQVILNSSRPLK.[Y]	1×HexNAc [N/S]	FALSE	0.0047	0.0031	1	4	1	2	Q9VIT9	Q9VIT9 [530-545]	2048.1	0.010; 0.010	;	141568.53125; ;	269		Light	0.002009	2.82	67.14
221	1	High	[K].IGNFENVTVTATDKYNNR.[A]	1×HexNAc [N/T]	FALSE	0.018	0.0011	1	2	1	1	E1JHA6	E1JHA6 [1605-1622]	2259.09	0.010; 0.010	;	66341.1484375; ;	569		Light	0.01653	3.09	60.21
	2	High	[K].IGNFENVTVTATDKYNNR.[A]	1×HexNAc [N/T]	FALSE	1.5e-05	0.0031	1	2	2	3	E1JHA6	E1JHA6 [1605-1622]	2259.09	0.010; 0.010	;	845896.25; ;	268		Light	3.25e-06	5.09	60.33
222	1	High	[K].IGNFENVTVTATDK.[Y]	1×HexNAc [N/T]	FALSE	0.034	0.0037	1	2	1	1	E1JHA6	E1JHA6 [1605-1618]	1711.84				267	NoQuanValues	Light	0.01799	1.7
223	1	High	[K].HPLESEVYAVYNGNTTIVCDPEAAPRPK.[F]	1×Carbamidomethyl [C19]; 1×HexNAc [N/T/S]	FALSE	0.00035	0.0031	1	1	1	1	Q9VN14	Q9VN14 [761-788]	3330.59				213	NoQuanValues	Light	0.0001098	4.35
224	1	High	[K].HNPTQTLNATYVQTDTWR.[C]	1×HexNAc [N/T]	FALSE	0.01	0.0031	1	2	1	1	M9PG87	M9PG87 [1090-1107]	2349.11				212	NoQuanValues	Light	0.004826	2.62
225	1	High	[K].GSVNASALSK.[S]	1×HexNAc [S/N]	FALSE	0.059	0.0065	1	1	1	3	Q9W5B4	Q9W5B4 [78-87]	1136.58	166083		High	High	0.001362	0.01381
226	1	High	[K].GNTTQYYYANPR.[T]	1×HexNAc [N/T]	FALSE	0.067	0.0037	1	2	1	1	M9PGF7	M9PGF7 [2830-2841]	1650.74	0.010; 0.010	;	36378.41796875; ;	197		Light	0.03843	1.58	48.47
227	1	High	[K].GNFSENCPKDVR.[E]	1×Carbamidomethyl [C7]; 1×HexNAc [N/S]	FALSE	0.16	0.0089	1	3	1	1	Q8T3W8	Q8T3W8 [38-49]	1625.72	0.010; 0.010	;	79323.078125; ;	194		Light	0.1021	1.12	35.95
228	1	High	[K].GIIENVNAPKNESAPGEK.[K]	1×HexNAc [N/S]	FALSE	0.032	0.0019	1	1	1	1	Q9VPQ7	Q9VPQ7 [15-32]	2070.03	0.010; 0.010	;	249345.328125; ;	403		Light	0.0282	3.05	47.73
	2	High	[K].GIIENVNAPKNESAPGEK.[K]	1×HexNAc [N/S]	FALSE	0.00082	0.0031	1	1	1	2	Q9VPQ7	Q9VPQ7 [15-32]	2070.03	0.010; 0.010	;	714267.75; ;	189		Light	0.0002834	4.98	47.78
	3	High	[K].GIIENVNAPKNESAPGEK.[K]	1×HexNAc [N/S]	FALSE	0.0082	0.0065	1	1	1	6	Q9VPQ7	Q9VPQ7 [15-32]	2070.03	40239.8		High	High	0.001362	0.0009178
229	1	High	[K].GGYTFYNVTSVK.[V]	1×HexNAc [N/T/S]	FALSE	0.018	0.0011	1	1	1	1	Q9VB77	Q9VB77 [171-182]	1538.74	0.010; 0.010	;	36344.703125; ;	396		Light	0.01669	1.28	67.33
230	1	High	[K].GGTKDQPTNATLSIIPR.[R]	1×HexNAc [T/N/S]	FALSE	0.028	0.0037	1	2	1	1	Q9VQW7	Q9VQW7 [202-218]	1972.03	0.010; 0.010	;	57237.7265625; ;	183		Light	0.01461	2.09	59.48
231	1	High	[K].GDTGNYGCNATNSLGYVYK.[D]	1×Carbamidomethyl [C8]; 1×HexNAc [N/T/S]	FALSE	0.00026	0.0011	1	3	1	2	M9NEZ5	M9NEZ5 [403-421]	2256.97	0.010; 0.010	;	141255.265625; ;	361		Light	0.0002792	3.44	65.27
	2	High	[K].GDTGNYGCNATNSLGYVYK.[D]	1×Carbamidomethyl [C8]; 1×HexNAc [N/T/S]	FALSE	5.2e-05	0.0031	1	3	2	6	M9NEZ5	M9NEZ5 [403-421]	2256.97	0.010; 0.010	;	370359.7890625; ;	165		Light	1.328e-05	4.21	65.56
232	1	High	[K].FSNASFEELDRLK.[Q]	1×HexNAc [S/N]	FALSE	0.00036	0.0011	1	3	1	1	Q0KHQ2	Q0KHQ2 [286-298]		1	1758.85	0.010; 0.010	;	57261.04296875; ;	330	High	0.0008681	0.0003733	2.72	67.86
	2	High	[K].FSNASFEELDRLK.[Q]	1×HexNAc [S/N]	FALSE	0.0004	0.0031	1	3	1	2	Q0KHQ2	Q0KHQ2 [286-298]	1758.85				155	NoQuanValues	Light	0.0001278	3.19	67.97
233	1	High	[K].FSHFNDQLNNTQR.[R]	1×HexNAc [N/T/S]	FALSE	0.0038	0.0011	1	7	1	2	A0A0B4KH94	A0A0B4KH94 [486-498]	1823.83	0.010; 0.010	;	755706.5625; ;	329		Light	0.003623	3.16	47.23
	2	High	[K].FSHFNDQLNNTQR.[R]	1×HexNAc [N/T/S]	FALSE	0.011	0.0031	1	7	2	3	A0A0B4KH94	A0A0B4KH94 [486-498]	1823.83	0.010; 0.010	;	1340331.421875; ;	154		Light	0.004958	3.36	47.31
	3	High	[K].FSHFNDQLNNTQR.[R]	1×HexNAc [N/T/S]	FALSE	0.026	0.0065	1	7	1	2	A0A0B4KH94	A0A0B4KH94 [486-498]	1823.83		NoQuanValues	High	High	0.001362	0.004445
234	1	High	[K].FNITGR.[S]	1×HexNAc [N/T]	FALSE	0.11	0.0085	1	1	1	1	M9PBU9	M9PBU9 [1470-1475]	910.463	0.010; 0.010	;	322159.125; ;	325		Light	0.09422	0.87	46.58
235	1	High	[K].FLCTNGTIFNQK.[E]	1×Carbamidomethyl [C3]; 1×HexNAc [T/N]	FALSE	0.028	0.0037	1	1	1	2	Q9VT02	Q9VT02 [107-118]	1645.79				148	NoQuanValues	Light	0.0146	2.01
236	1	High	[K].EYGVNCSDISWDR.[V]	1×Carbamidomethyl [C6]; 1×HexNAc [N/S]	FALSE	0.0053	0.0031	1	2	1	2	Q9VPD3	Q9VPD3 [201-213]	1803.75				144	NoQuanValues	Light	0.002293	2.12
237	1	High	[K].ETGTCNNYSVK.[Y]	1×Carbamidomethyl [C5]; 1×HexNAc [N/S/T]	FALSE	0.027	0.0037	1	1	1	2	Q868Z9	Q868Z9 [1617-1627]	1475.63	0.010; 0.010	;	260655.46875; ;	142		Light	0.01424	2.13	34.09
238	1	High	[K].ESNTTCLDYKYDK.[M]	1×Carbamidomethyl [C6]; 1×HexNAc [S/N/T]	FALSE	0.0036	0.0011	1	1	1	1	Q9VS02	Q9VS02 [336-348]	1839.8	0.010; 0.010	;	112668.109375; ;	295		Light	0.00351	2.45	44
	2	High	[K].ESNTTCLDYKYDK.[M]	1×Carbamidomethyl [C6]; 1×HexNAc [S/N/T]	FALSE	0.0029	0.0031	1	1	1	3	Q9VS02	Q9VS02 [336-348]	1839.8	0.010; 0.010	;	227843.3125; ;	141		Light	0.001172	2.62	44.29
239	1	High	[K].ENQTVQLITR.[S]	1×HexNAc [N/T]	FALSE	0.0028	0.0011	1	1	1	1	Q9V9S0	Q9V9S0 [206-215]	1404.73	0.010; 0.010	;	90948.953125; ;	284		Light	0.002763	1.67	53.58
	2	High	[K].ENQTVQLITR.[S]	1×HexNAc [N/T]	FALSE	0.067	0.0037	1	1	1	1	Q9V9S0	Q9V9S0 [206-215]	1404.73	0.010; 0.010	;	89572.9921875; ;	135		Light	0.03896	1.88	53.72
240	1	High	[K].ELTLLDLSNNTITQR.[L]	1×HexNAc [T/N/S]	FALSE	0.08	0.0037	1	2	1	1	Q9VU13	Q9VU13 [195-209]	1934.01				131	NoQuanValues	Light	0.04713	3.37
241	1	High	[K].ELNKTIIDGQGK.[V]	1×HexNAc [N/T]	FALSE	0.01	0.0011	1	1	1	2	Q9V496	Q9V496 [1977-1988]	1518.8	0.010; 0.010	;	150436.4375; ;	269		Light	0.009641	2.34	42.36
	2	High	[K].ELNKTIIDGQGK.[V]	1×HexNAc [N/T]	FALSE	0.084	0.0037	1	1	2	2	Q9V496	Q9V496 [1977-1988]	1518.8	0.010; 0.028	; 0.00	169151.71875; ; 4798.78857421875	127		Light	0.04986	1.95	42.51
242	1	High	[K].ELKENGIQLQESNIEGALNLTR.[H]	1×HexNAc [N/T/S]	FALSE	0.045	0.0019	1	1	1	1	P11046	P11046 [1312-1333]	2672.37				268	NoQuanValues	Light	0.03919	1.81
	2	High	[K].ELKENGIQLQESNIEGALNLTR.[H]	1×HexNAc [N/T/S]	FALSE	0.00022	0.0031	1	1	1	2	P11046	P11046 [1312-1333]	2672.37	0.010; 0.010	;	601767.375; ;	125		Light	6.68e-05	7.37	81.23
242	1	High	[K].DTPITCSPPTPENNHTLK.[C]	1×Carbamidomethyl [C6]; 1×HexNAc [N/T/S]	FALSE	0.038	0.0019	1	1	1	1	P12080	P12080 [728-745]	2225.04	0.010; 0.010	;	201790.875; ;	209		Light	0.03326	2.63	50.96
	2	High	[K].DTPITCSPPTPENNHTLK.[C]	1×Carbamidomethyl [C6]; 1×HexNAc [N/T/S]	FALSE	0.00037	0.0031	1	1	1	2	P12080	P12080 [728-745]	2225.04	0.010; 0.010	;	342433; ;	96		Light	0.000117	4.66	51.1
243	1	High	[K].CNNTEVTLIR.[K]	1×Carbamidomethyl [C1]; 1×HexNAc [N/T]	FALSE	0.12	0.0049	1	2	1	1	M9MSI4	M9MSI4 [27-36]	1422.69				65	NoQuanValues	Light	0.07414	1.23
244	1	High	[K].CDFQSLENATK.[T]	1×Carbamidomethyl [C1]; 1×HexNAc [N/T/S]	FALSE	0.0045	0.0031	1	5	1	1	Q9VZ96	Q9VZ96 [918-928]	1515.66	0.010; 0.010	;	117474.2421875; ;	62		Light	0.001906	2.41	57.54
245	1	High	[K].ATLNYTGR.[V]	1×HexNAc [N/T]	FALSE	0.028	0.0019	1	1	1	1	Q9W3G6	Q9W3G6 [130-137]	1098.54	0.010; 0.010	;	75778.90625; ;	127		Light	0.02503	1.12	40.6
	2	High	[K].ATLNYTGR.[V]	1×HexNAc [N/T]	FALSE	0.094	0.0049	1	1	2	3	Q9W3G6	Q9W3G6 [130-137]	1098.54	0.010; 0.010	;	1068375; ;	56		Light	0.05669	1.15	40.57
	3	High	[K].ATLNYTGR.[V]	1×HexNAc [N/T]	FALSE	0.073	0.0065	1	1	1	1	Q9W3G6	Q9W3G6 [130-137]	1098.54	86031.9		High	High	0.001362	0.01836
246	1	High	[K].AQEPTSHPAENENQQEQDAAVETPK.[A]	1×HexNAc [T/S/N]	FALSE	0.011	0.0011	1	1	1	1	Q7KMM4	Q7KMM4 [171-195]		0	2951.31	0.010; 0.010	;	59074.08984375; ;	100	High	0.0008681	0.01039	1.89	41.25
247	1	High	[K].ANVTLINTK.[I]	1×HexNAc [N/T]	FALSE	0.11	0.0049	1	1	1	1	Q9VC67	Q9VC67 [149-157]	1176.65	0.010; 0.010	;	227864.390625; ;	40		Light	0.06839	1.26	48.03
248	1	High	[K].ALNLSVEAK.[K]	1×HexNAc [N/S]	FALSE	0.019	0.0011	1	1	1	1	Q9VPS2	Q9VPS2 [125-133]	1147.62	0.010; 0.010	;	50940.2734375; ;	79		Light	0.01697	1.08	53.98
	2	High	[K].ALNLSVEAK.[K]	1×HexNAc [N/S]	FALSE	0.063	0.0037	1	1	1	2	Q9VPS2	Q9VPS2 [125-133]	1147.62	0.010; 0.010	;	438959.5; ;	30		Light	0.03626	1.54	54.08
	3	High	[K].ALNLSVEAK.[K]	1×HexNAc [N/S]	FALSE	0.077	0.0065	1	1	1	2	Q9VPS2	Q9VPS2 [125-133]	1147.62	69704.9		High	High	0.001362	0.02
249	1	High	[K].AHLNGSYQQR.[V]	1×HexNAc [N/S]	FALSE	0.13	0.0049	1	2	1	1	Q9VXM0	Q9VXM0 [980-989]	1376.66	0.010; 0.010	;	30158.0078125; ;	25		Light	0.07885	1.29	29.06
250	1	High	[K].AHIASGNK.[S]	1×HexNAc [S/N]	FALSE	0.17	0.0089	1	1	1	1	O77277	O77277 [90-97]	1000.51	0.010; 0.010	;	15545.1494140625; ;	24		Light	0.1113	0.97	20.59
251	1	High	[K].AFPLGSFNSSHR.[L]	1×HexNAc [S/N]	FALSE	0.033	0.0037	1	1	1	1	Q9VIH3	Q9VIH3 [495-506]	1522.73	0.299; 0.010	0.00;	42492.2265625; 12684.1318359375;	18		Light	0.01764	1.29	58.95
252	1	High	[K].AEDTPGVSDNSTRPGEDVFAR.[L]	1×HexNAc [N/S/T]	FALSE	0.049	0.0028	1	1	1	1	Q9VIF2	Q9VIF2 [135-155]	2423.1				41	NoQuanValues	Light	0.04338	1.47
	2	High	[K].AEDTPGVSDNSTRPGEDVFAR.[L]	1×HexNAc [N/S/T]	FALSE	0.14	0.008	1	1	1	1	Q9VIF2	Q9VIF2 [135-155]	2423.1				13	NoQuanValues	Light	0.09081	1.8
253	1	High	[R].YNYTLNPNGVYEAIK.[Y]	1×HexNAc [N/T]	FALSE	0.0076	0.0031	1	1	1	1	Q7KT70	Q7KT70 [517-531]	1961.95				653	NoQuanValues	Light	0.0034	2.25
254	1	High	[R].SALNTLQNVTDFR.[G]	1×HexNAc [N/T/S]	FALSE	0.17	0.0089	1	1	1	1	Q9VCU1	Q9VCU1 [130-142]	1681.84				479	NoQuanValues	Light	0.1091	2.62
